# Supplementary material
Source: bioRxiv or medRxiv preprint supplement (https://www.biorxiv.org/highwire/filestream/35388/field_highwire_adjunct_files/11/120170-6.pdf)

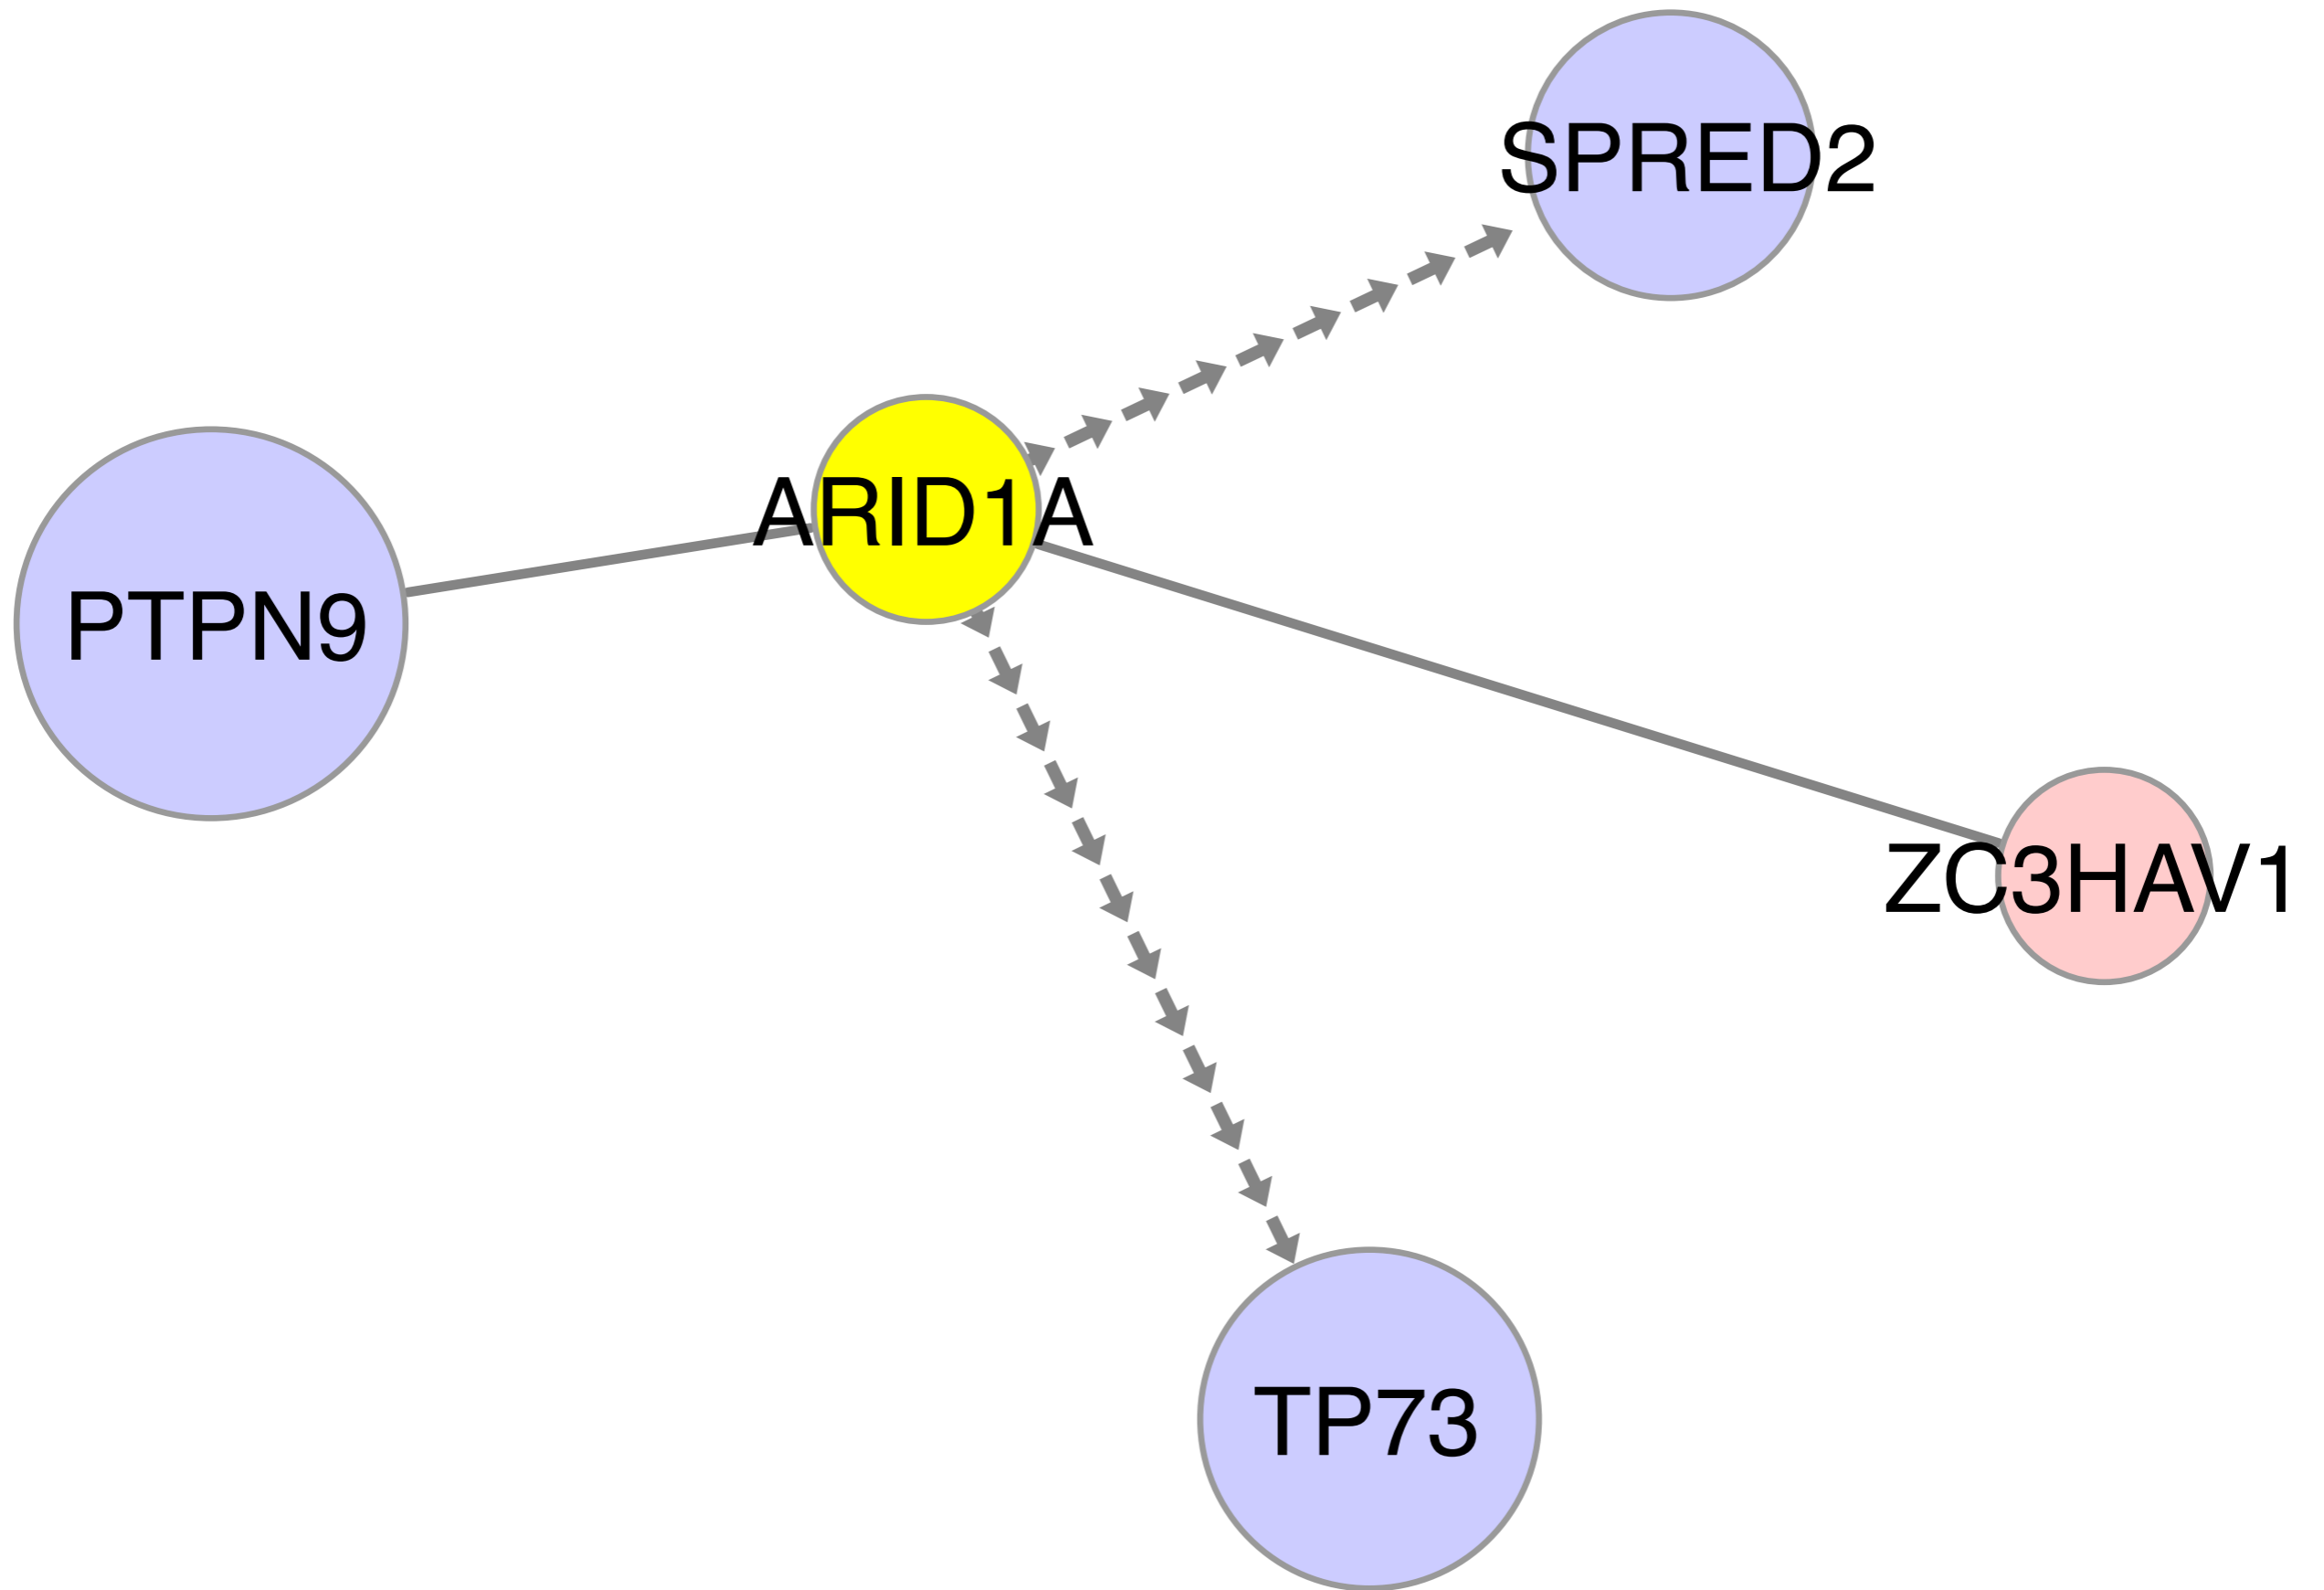

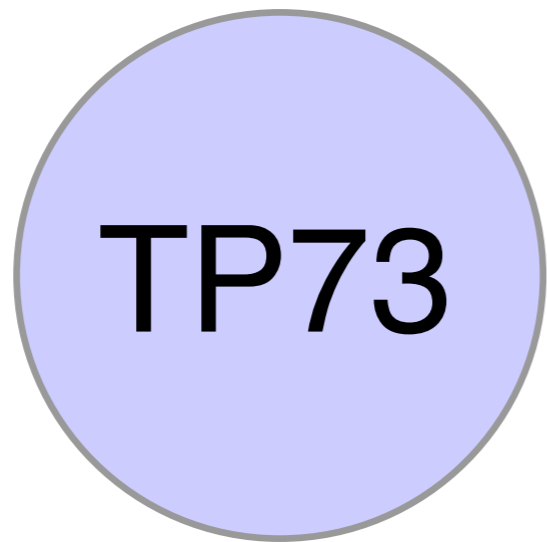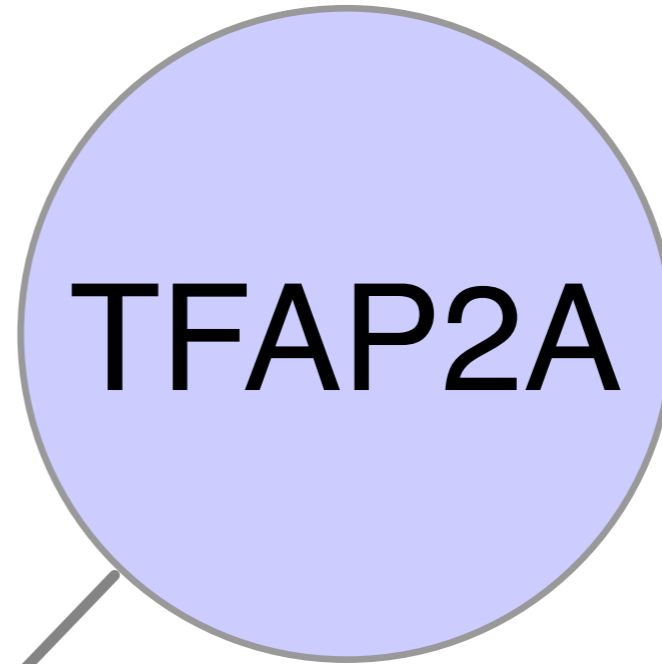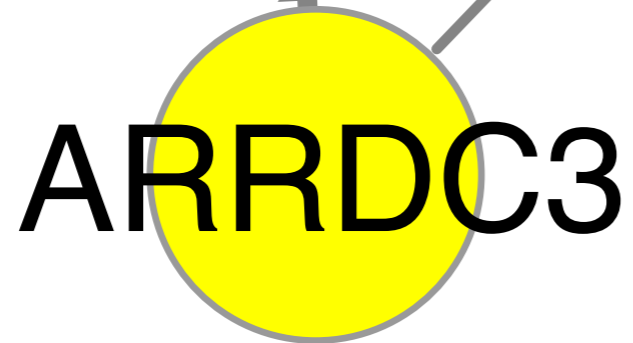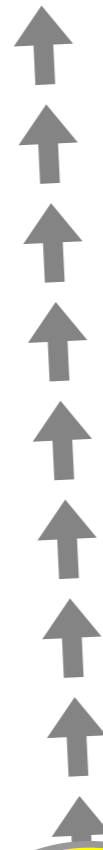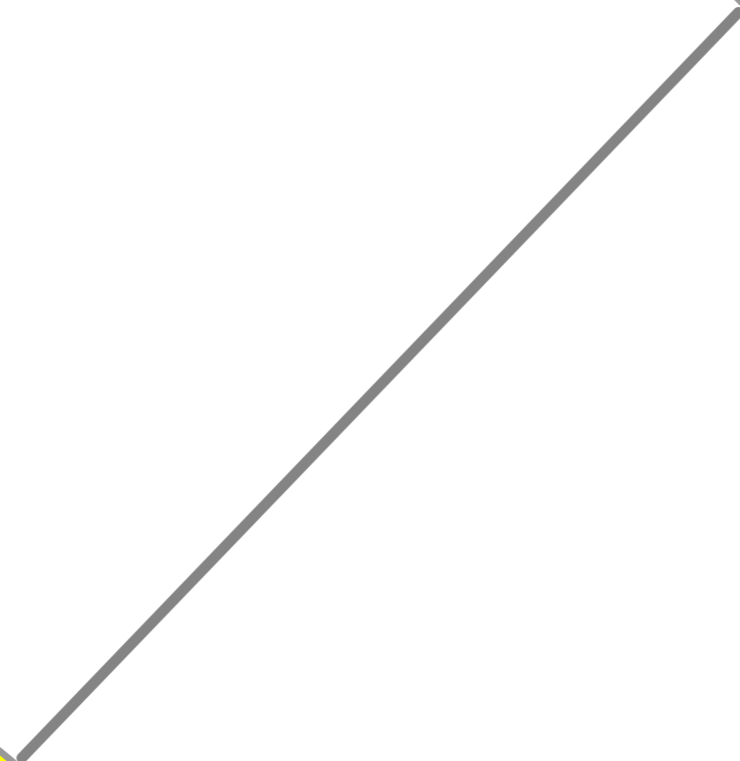

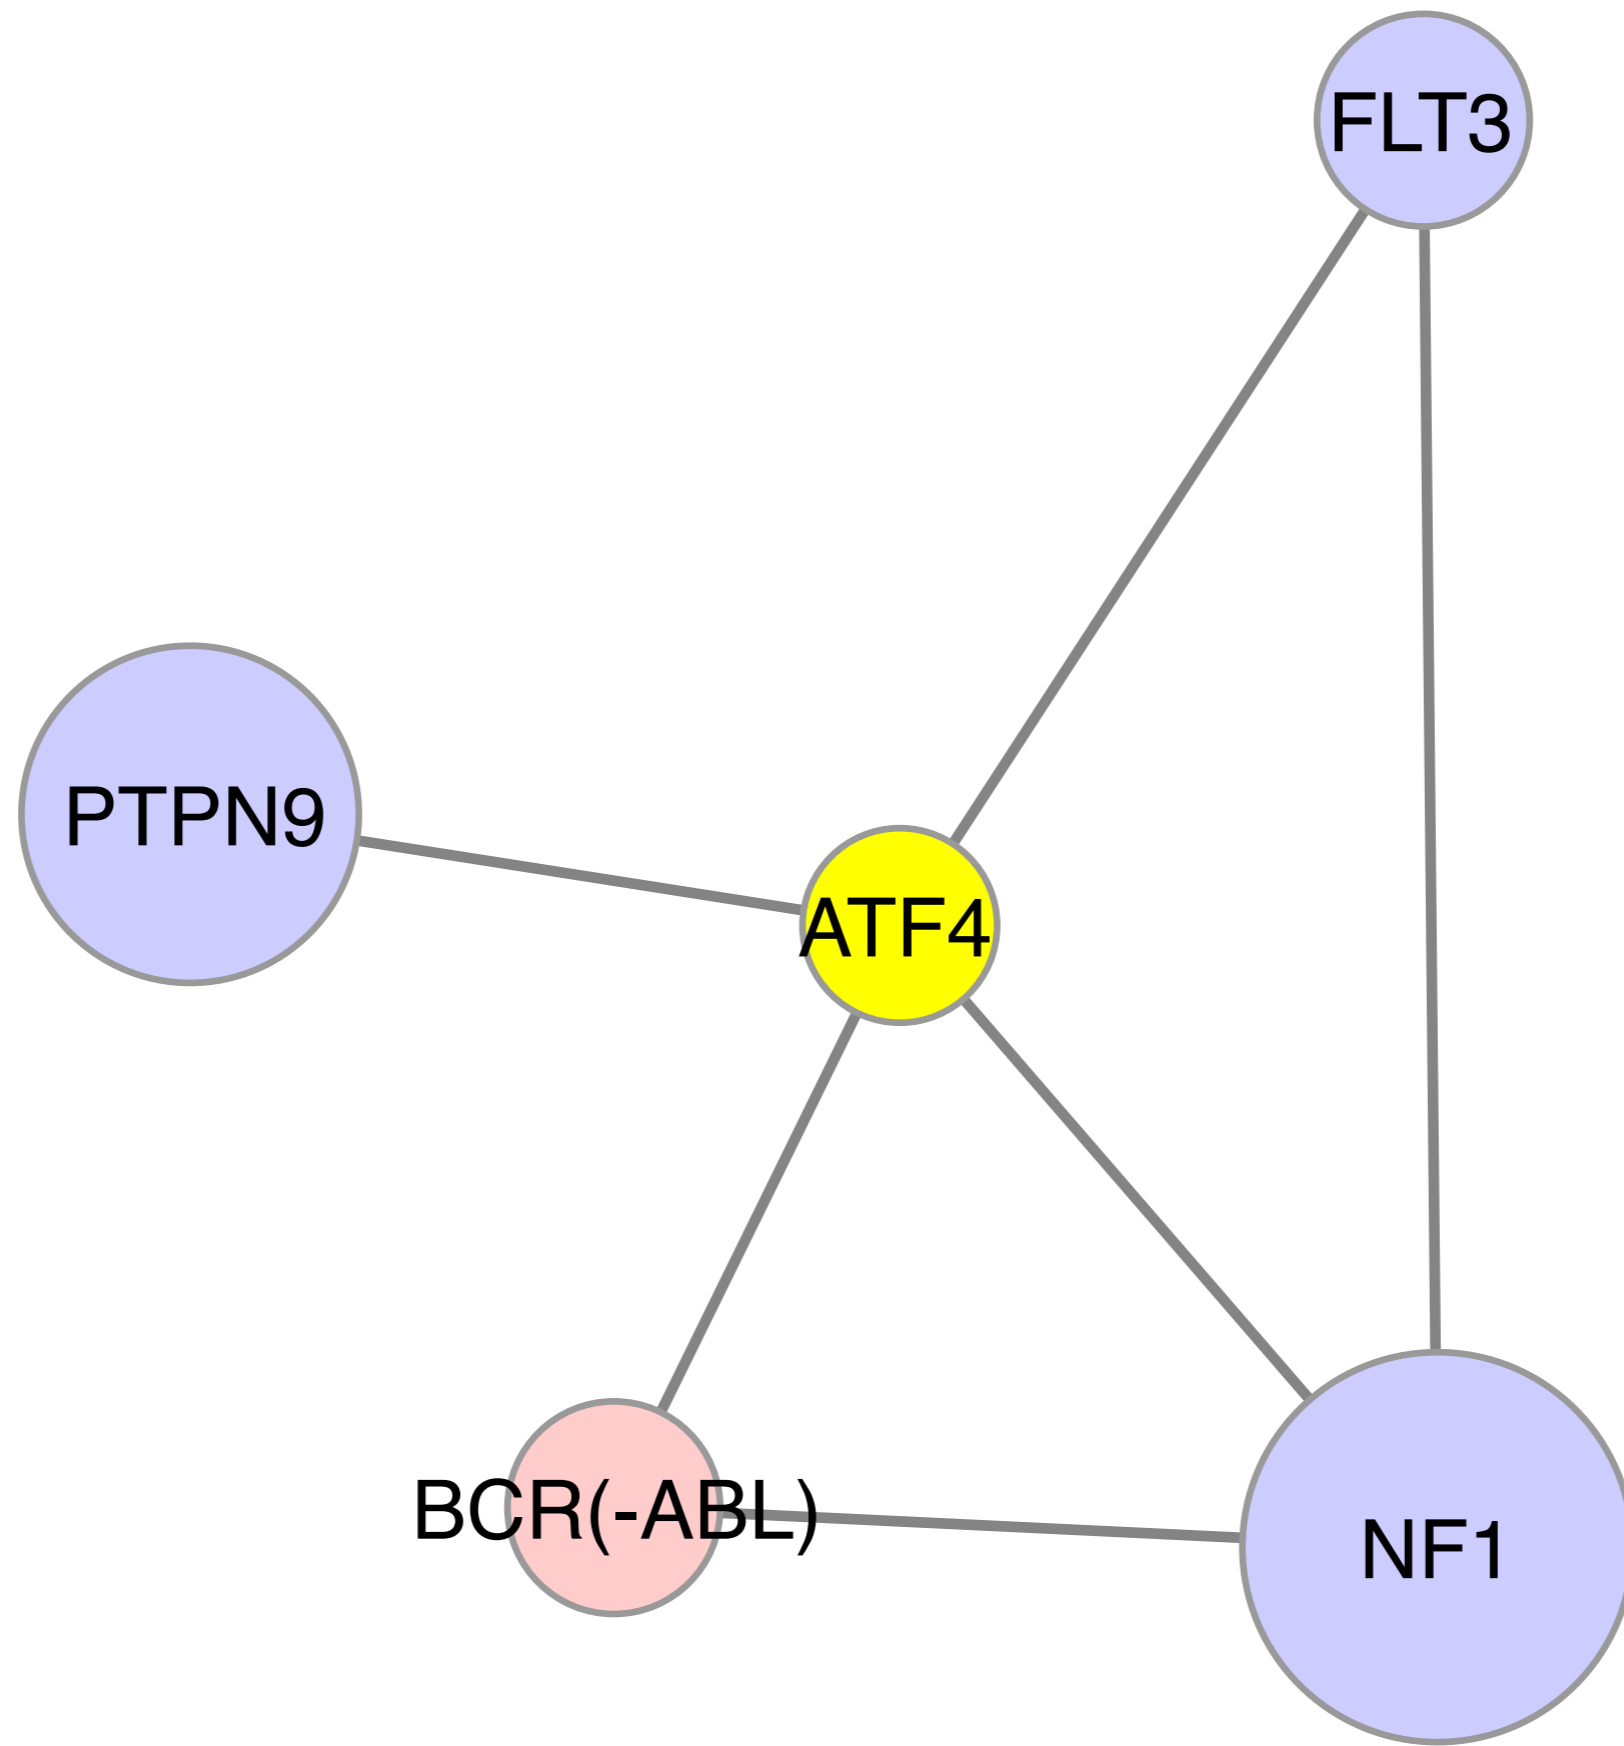

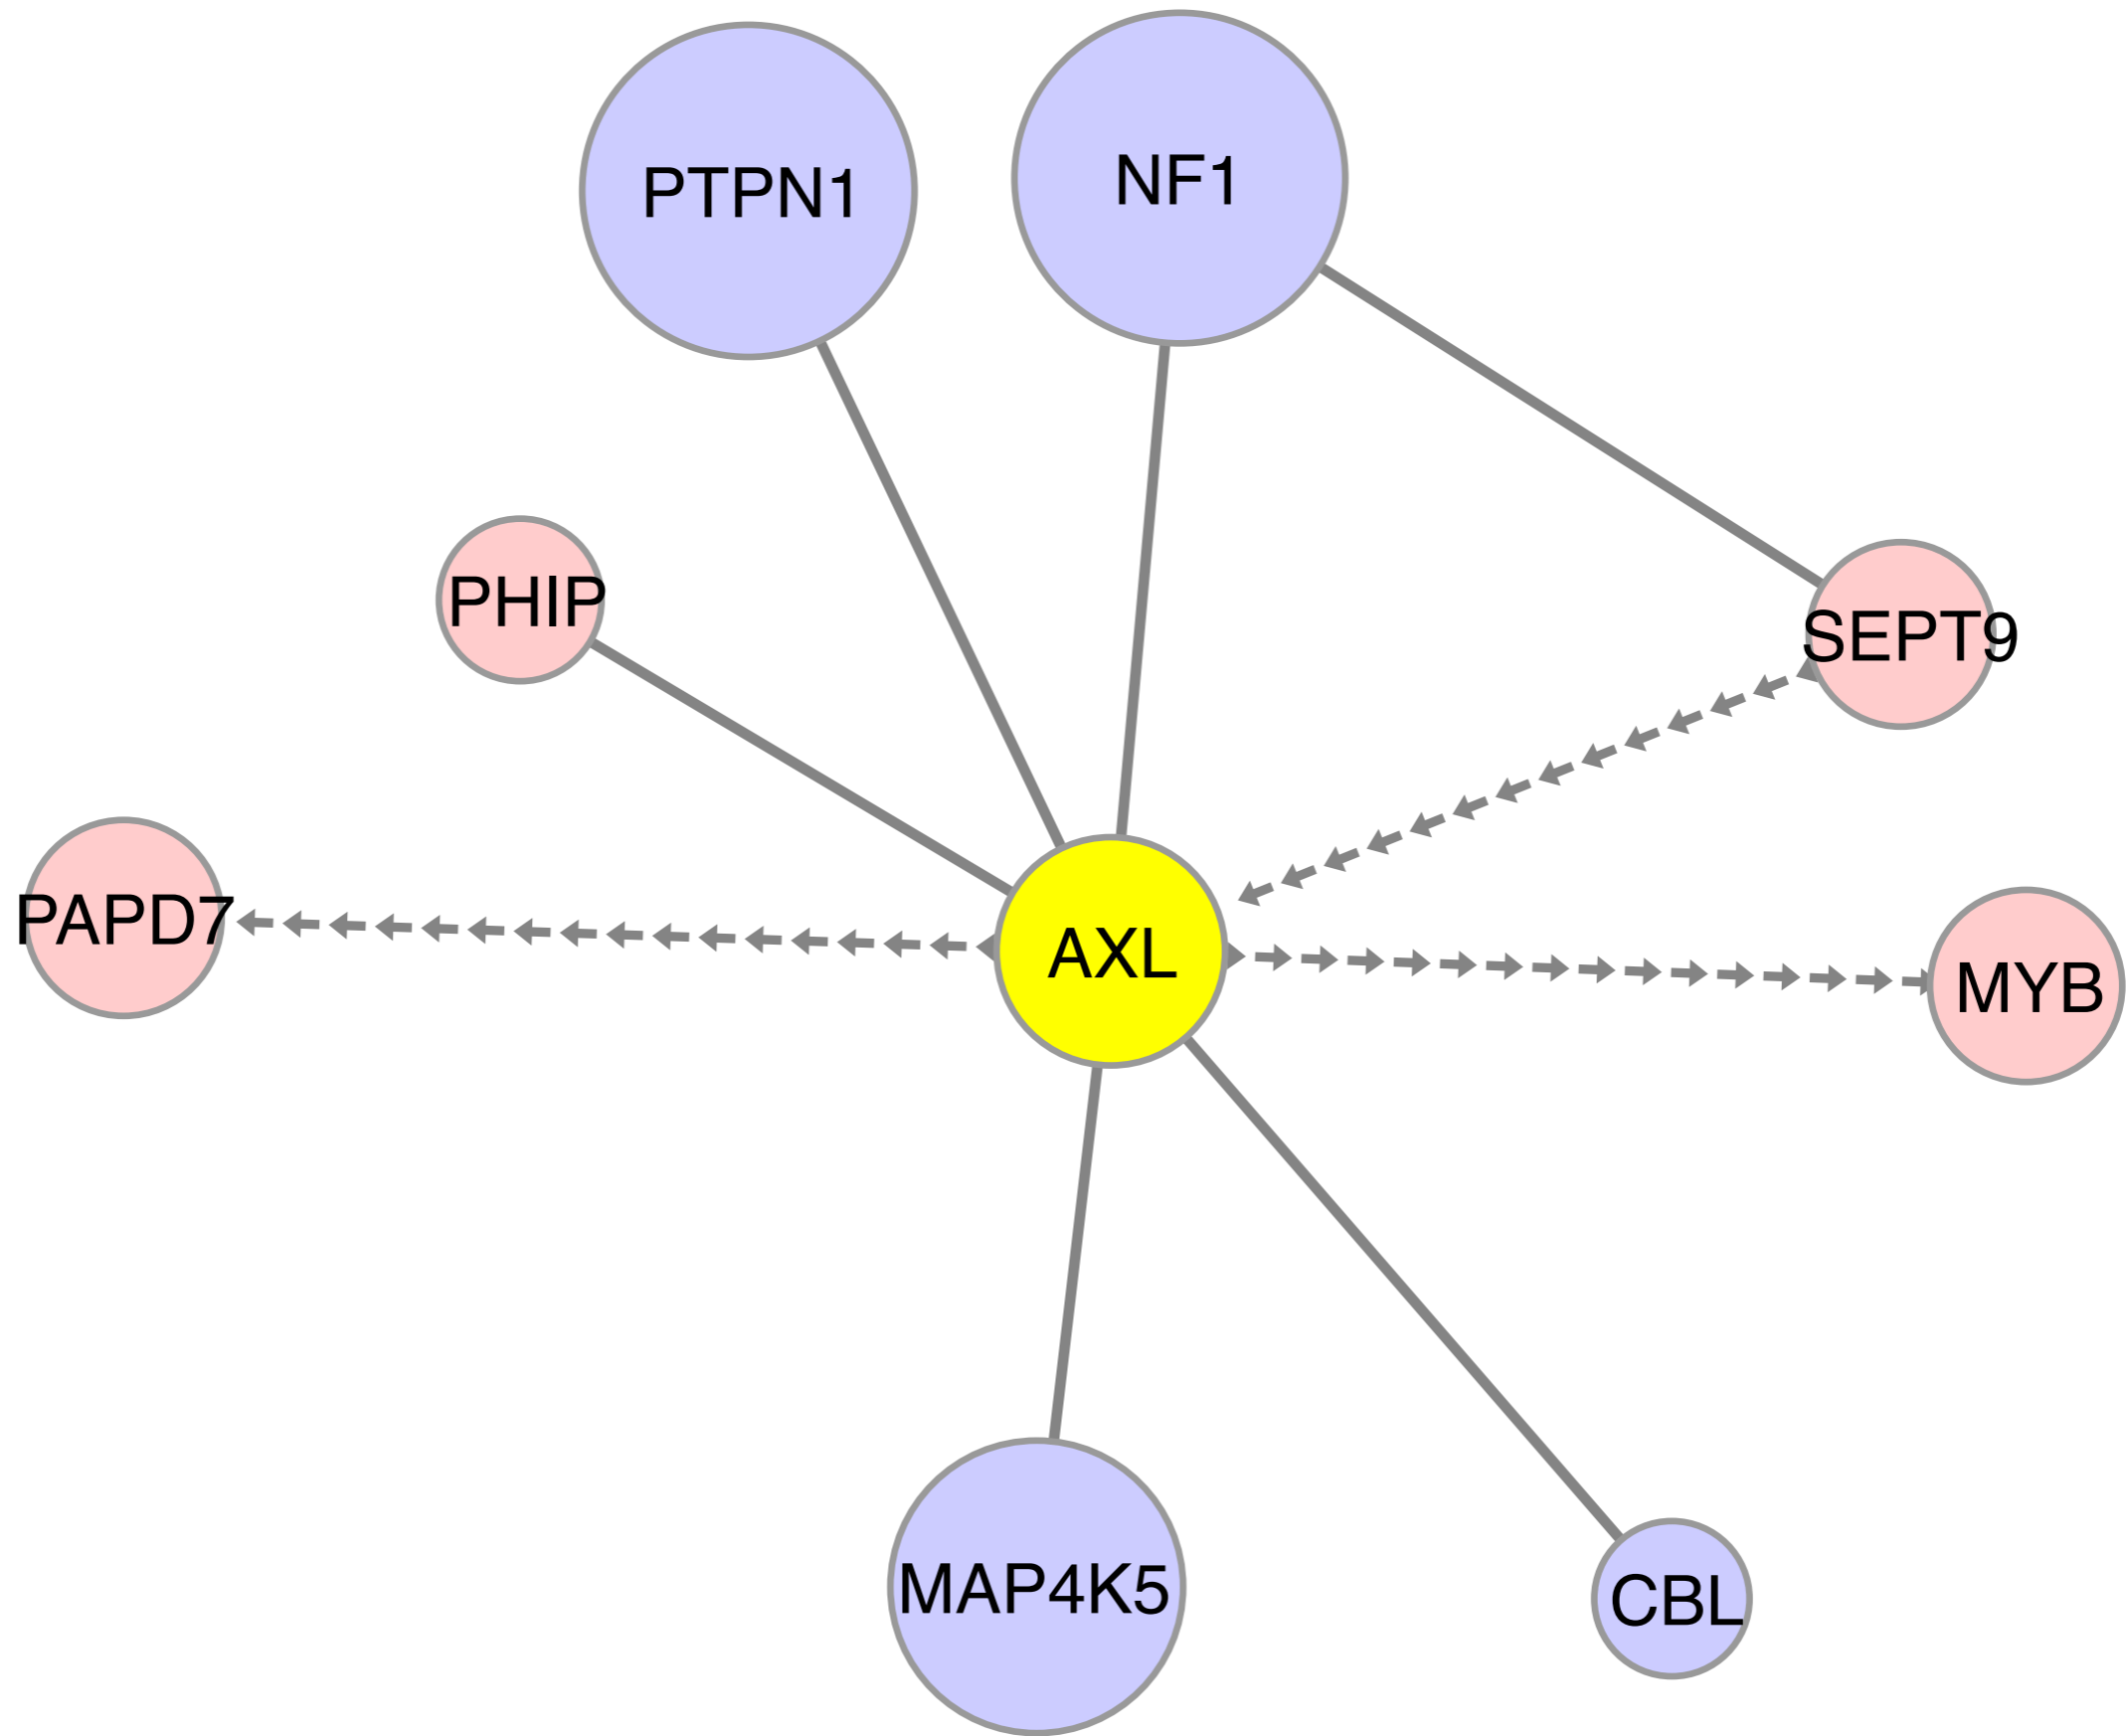

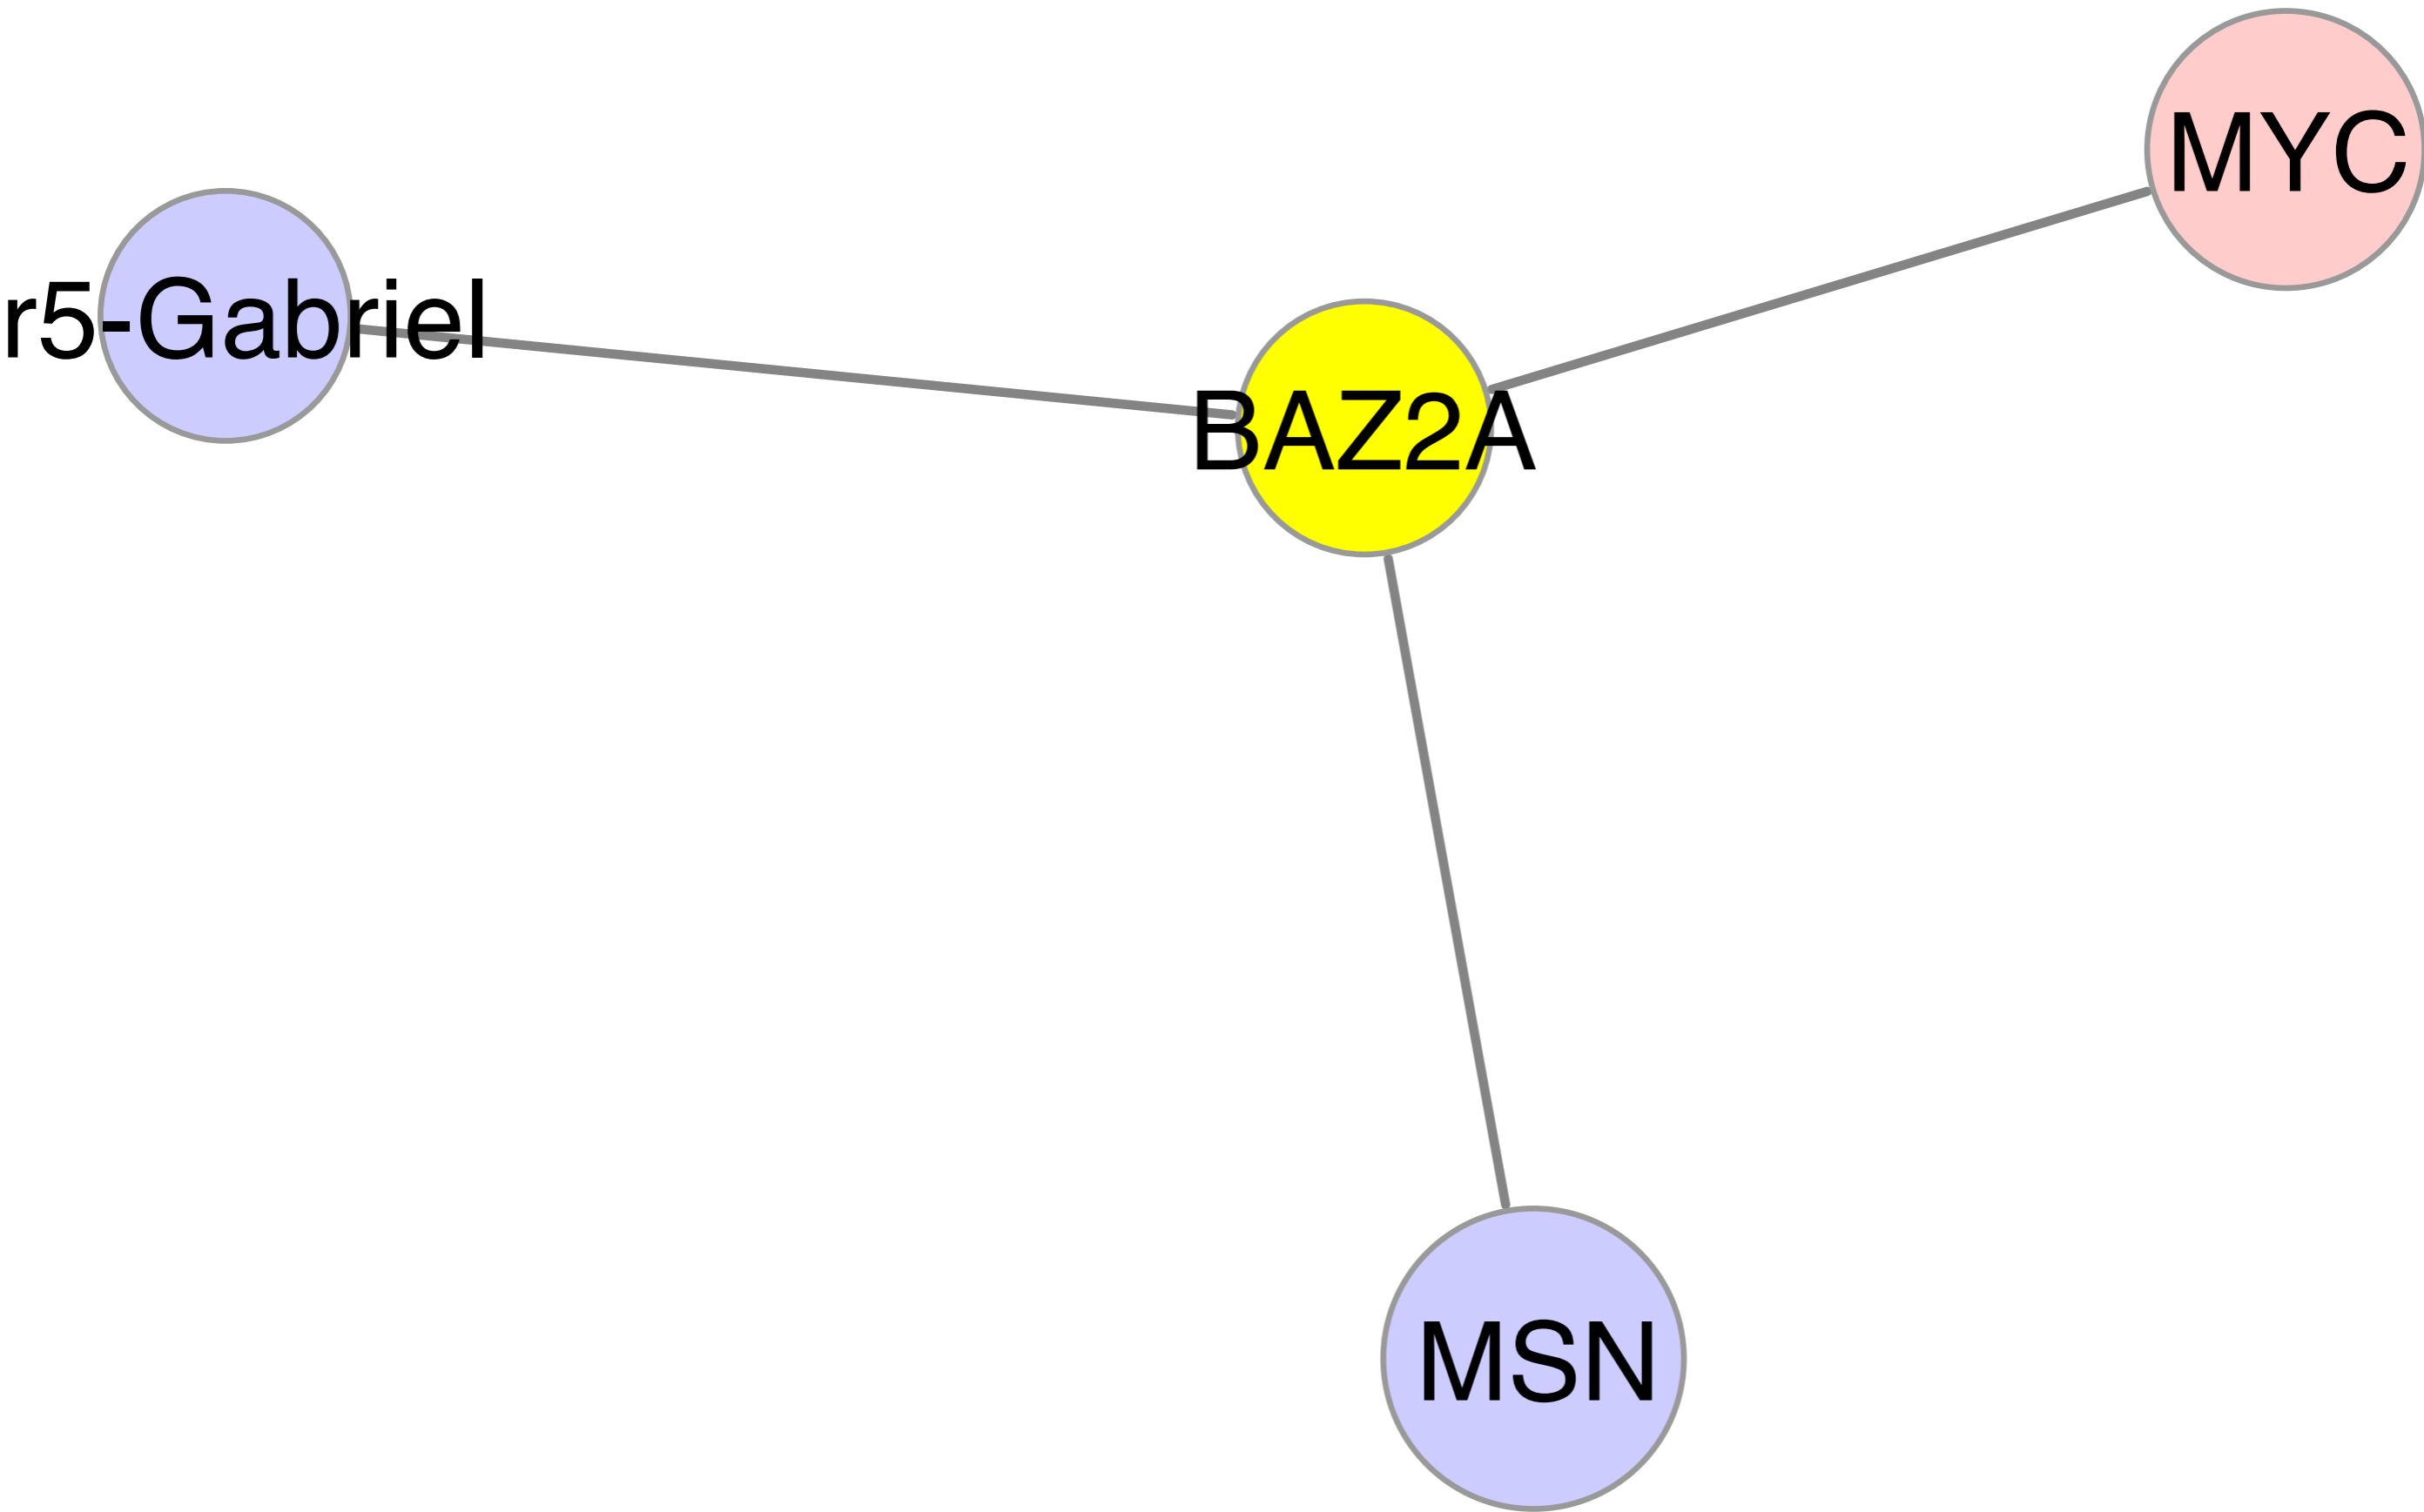

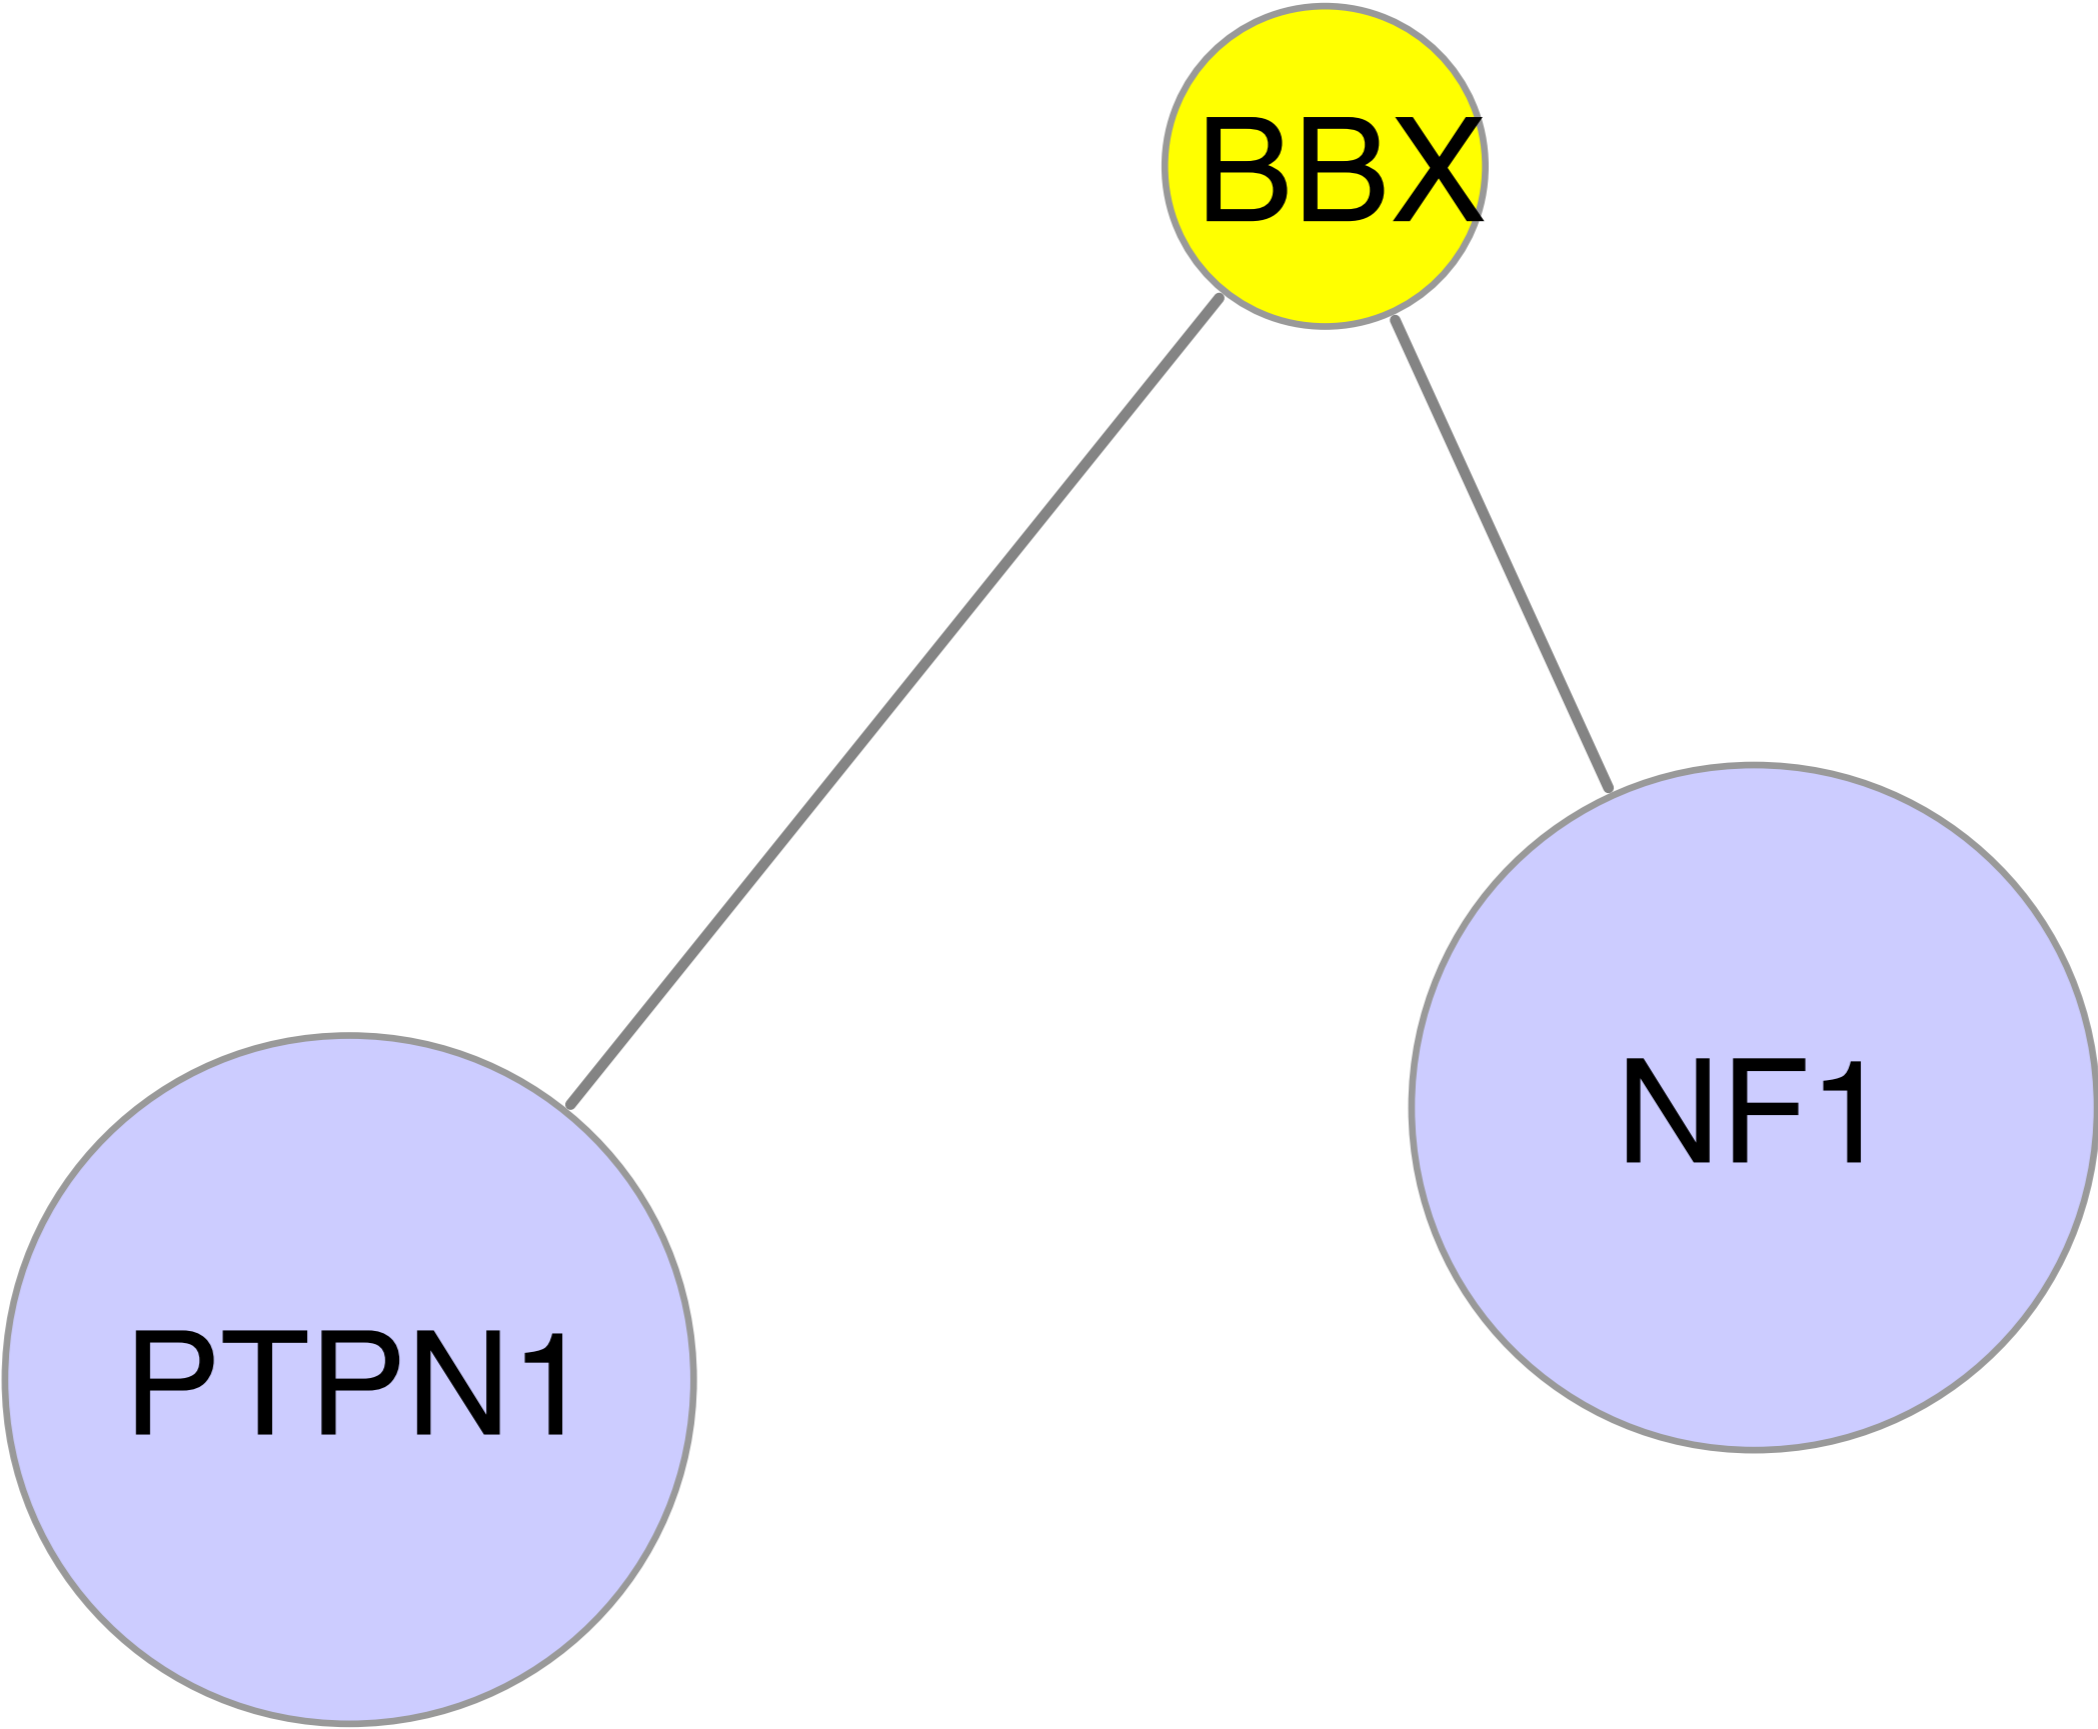

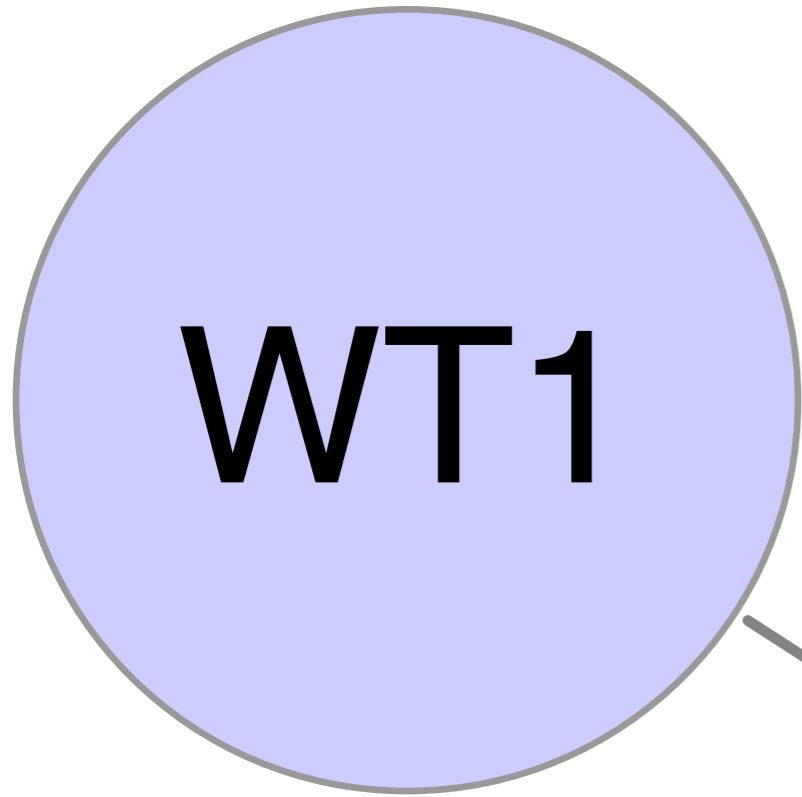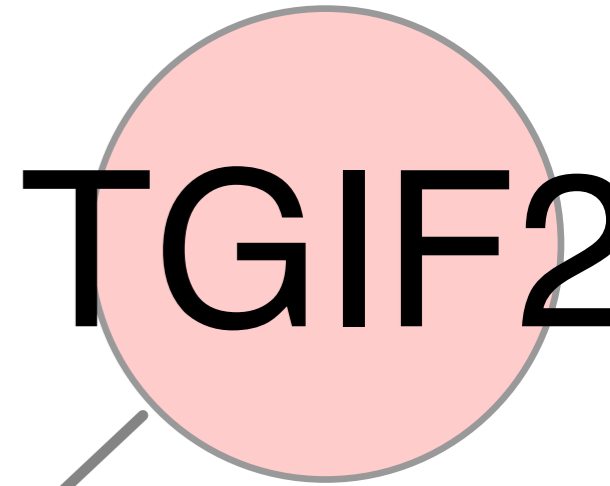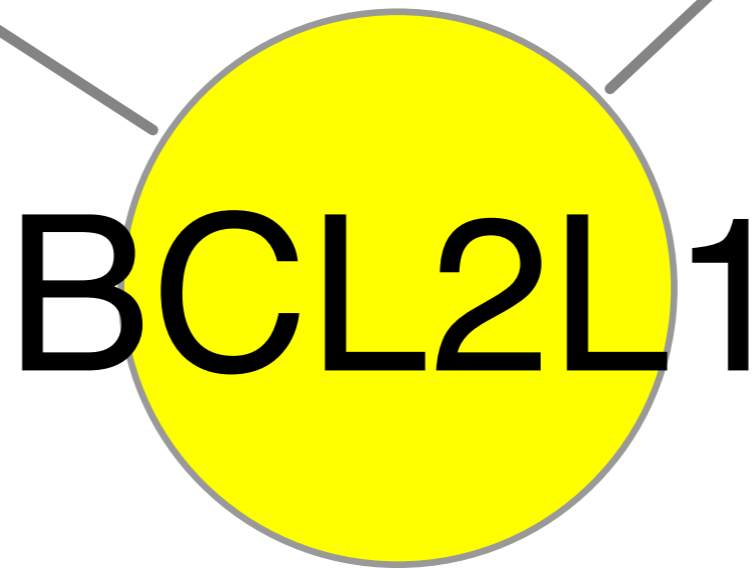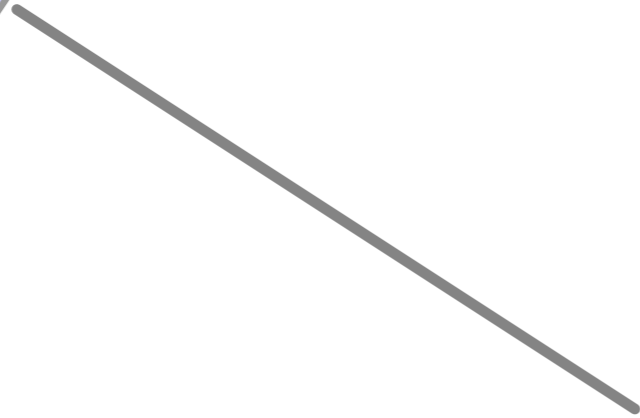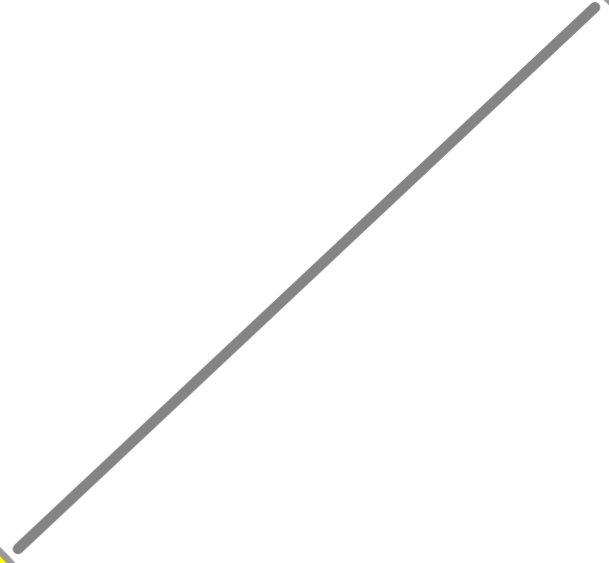

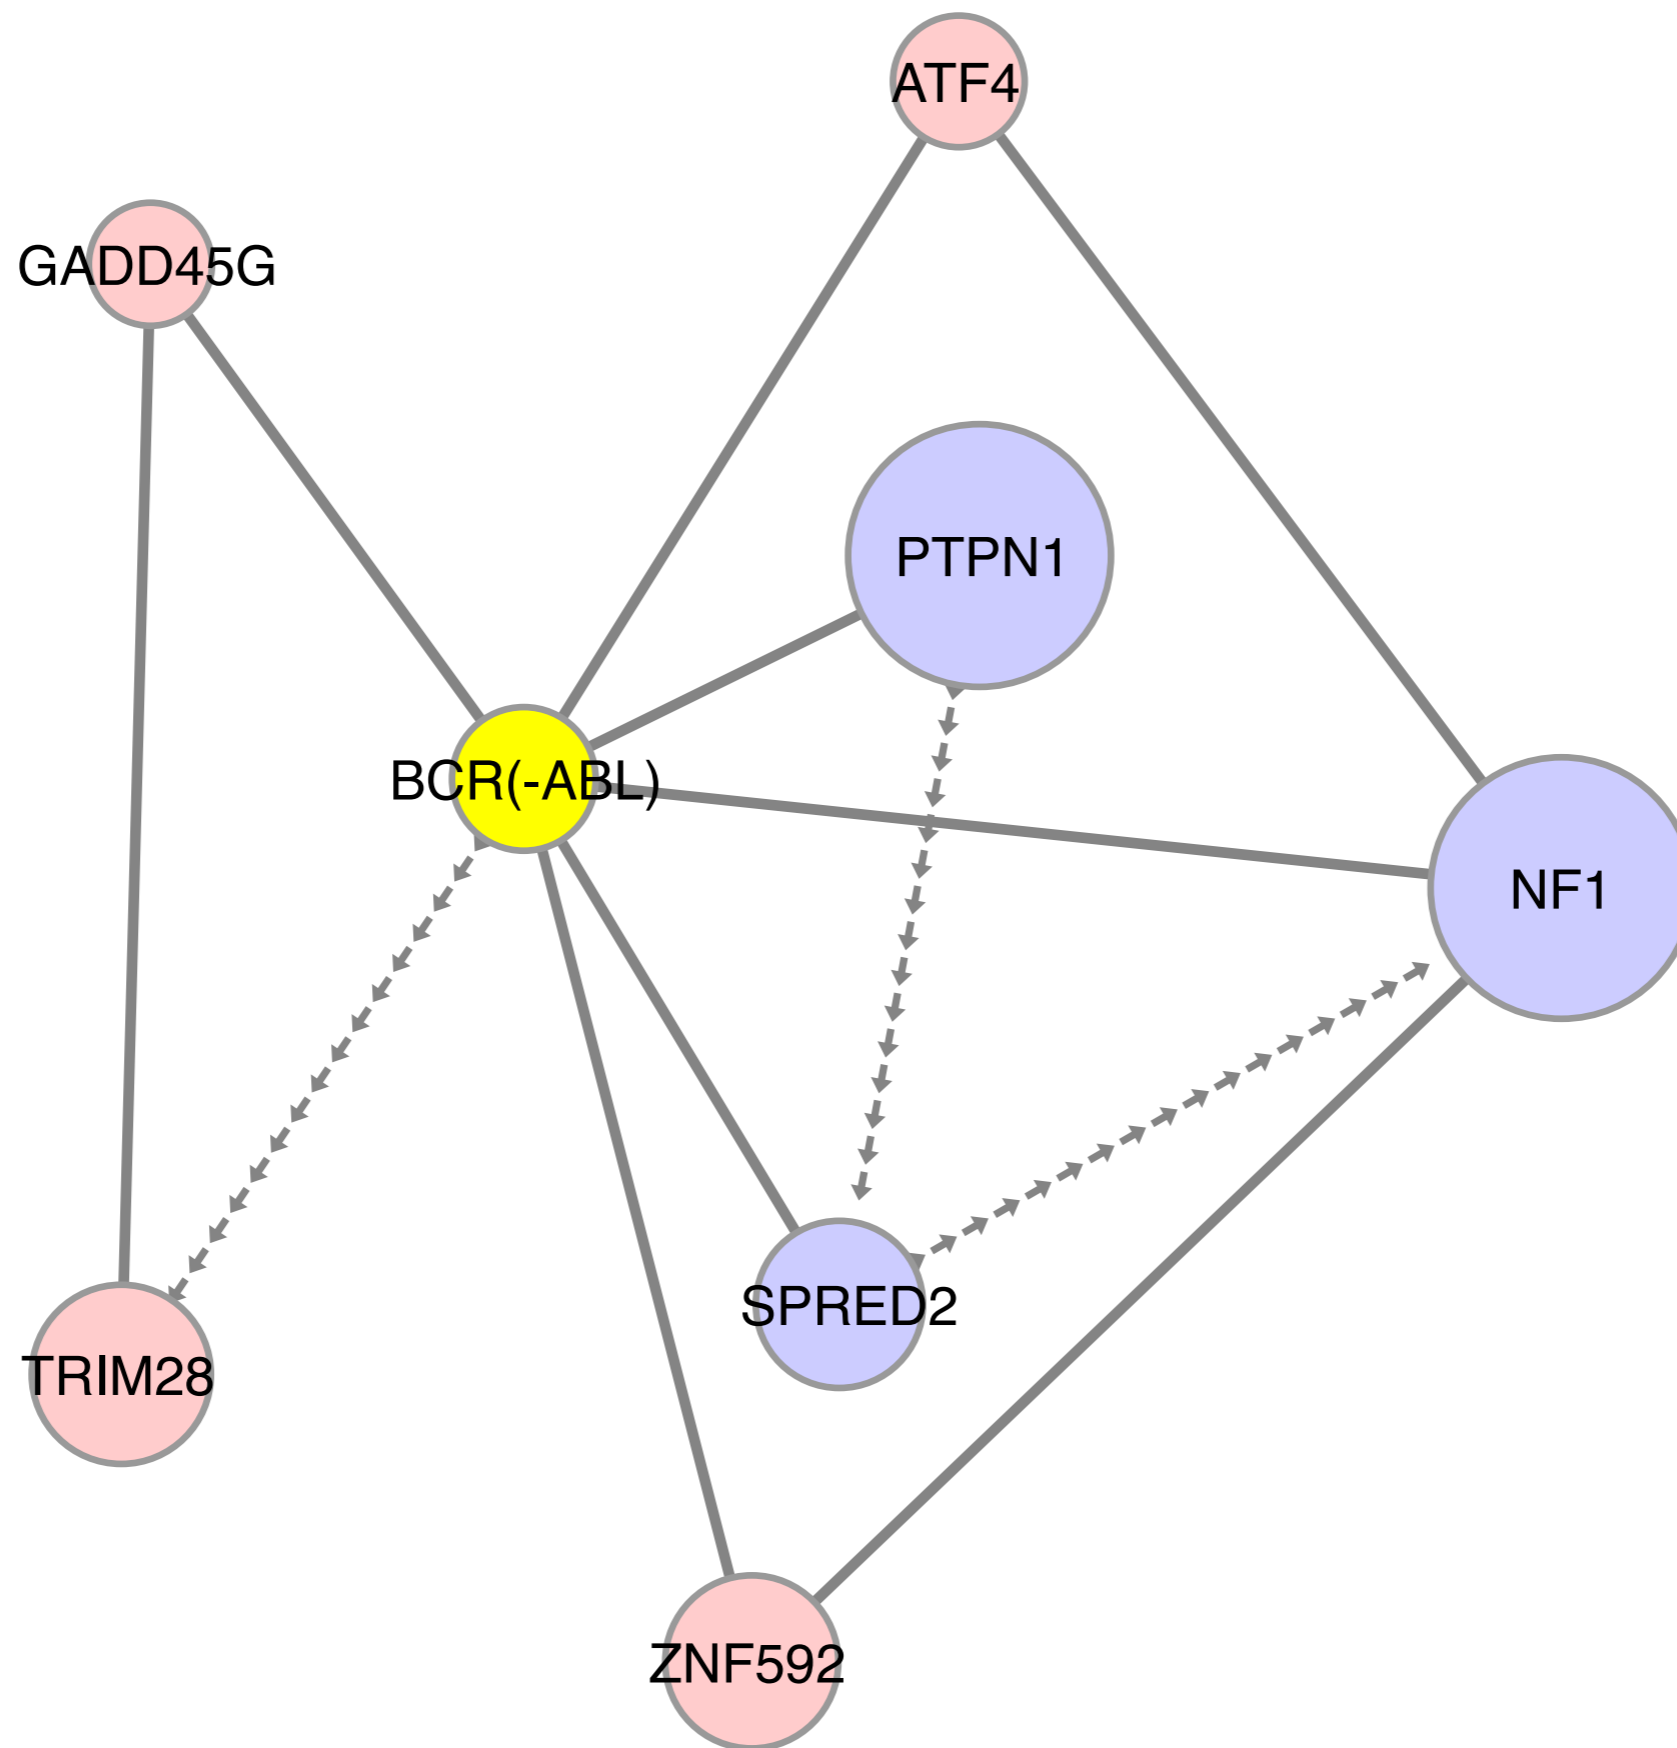



**CASZ1**



**PTPN1**

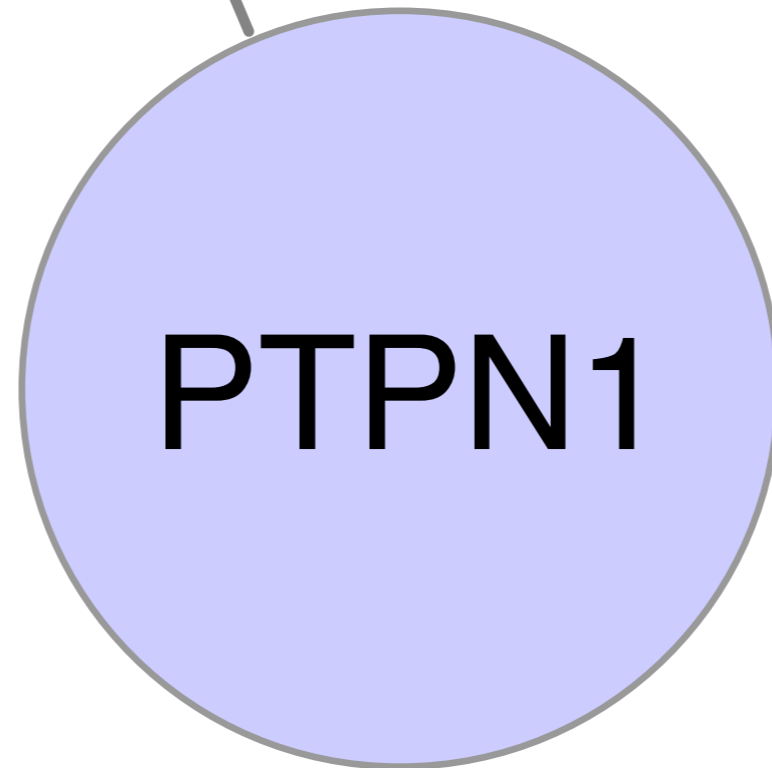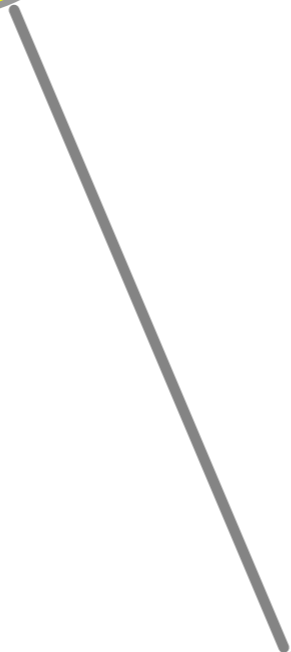

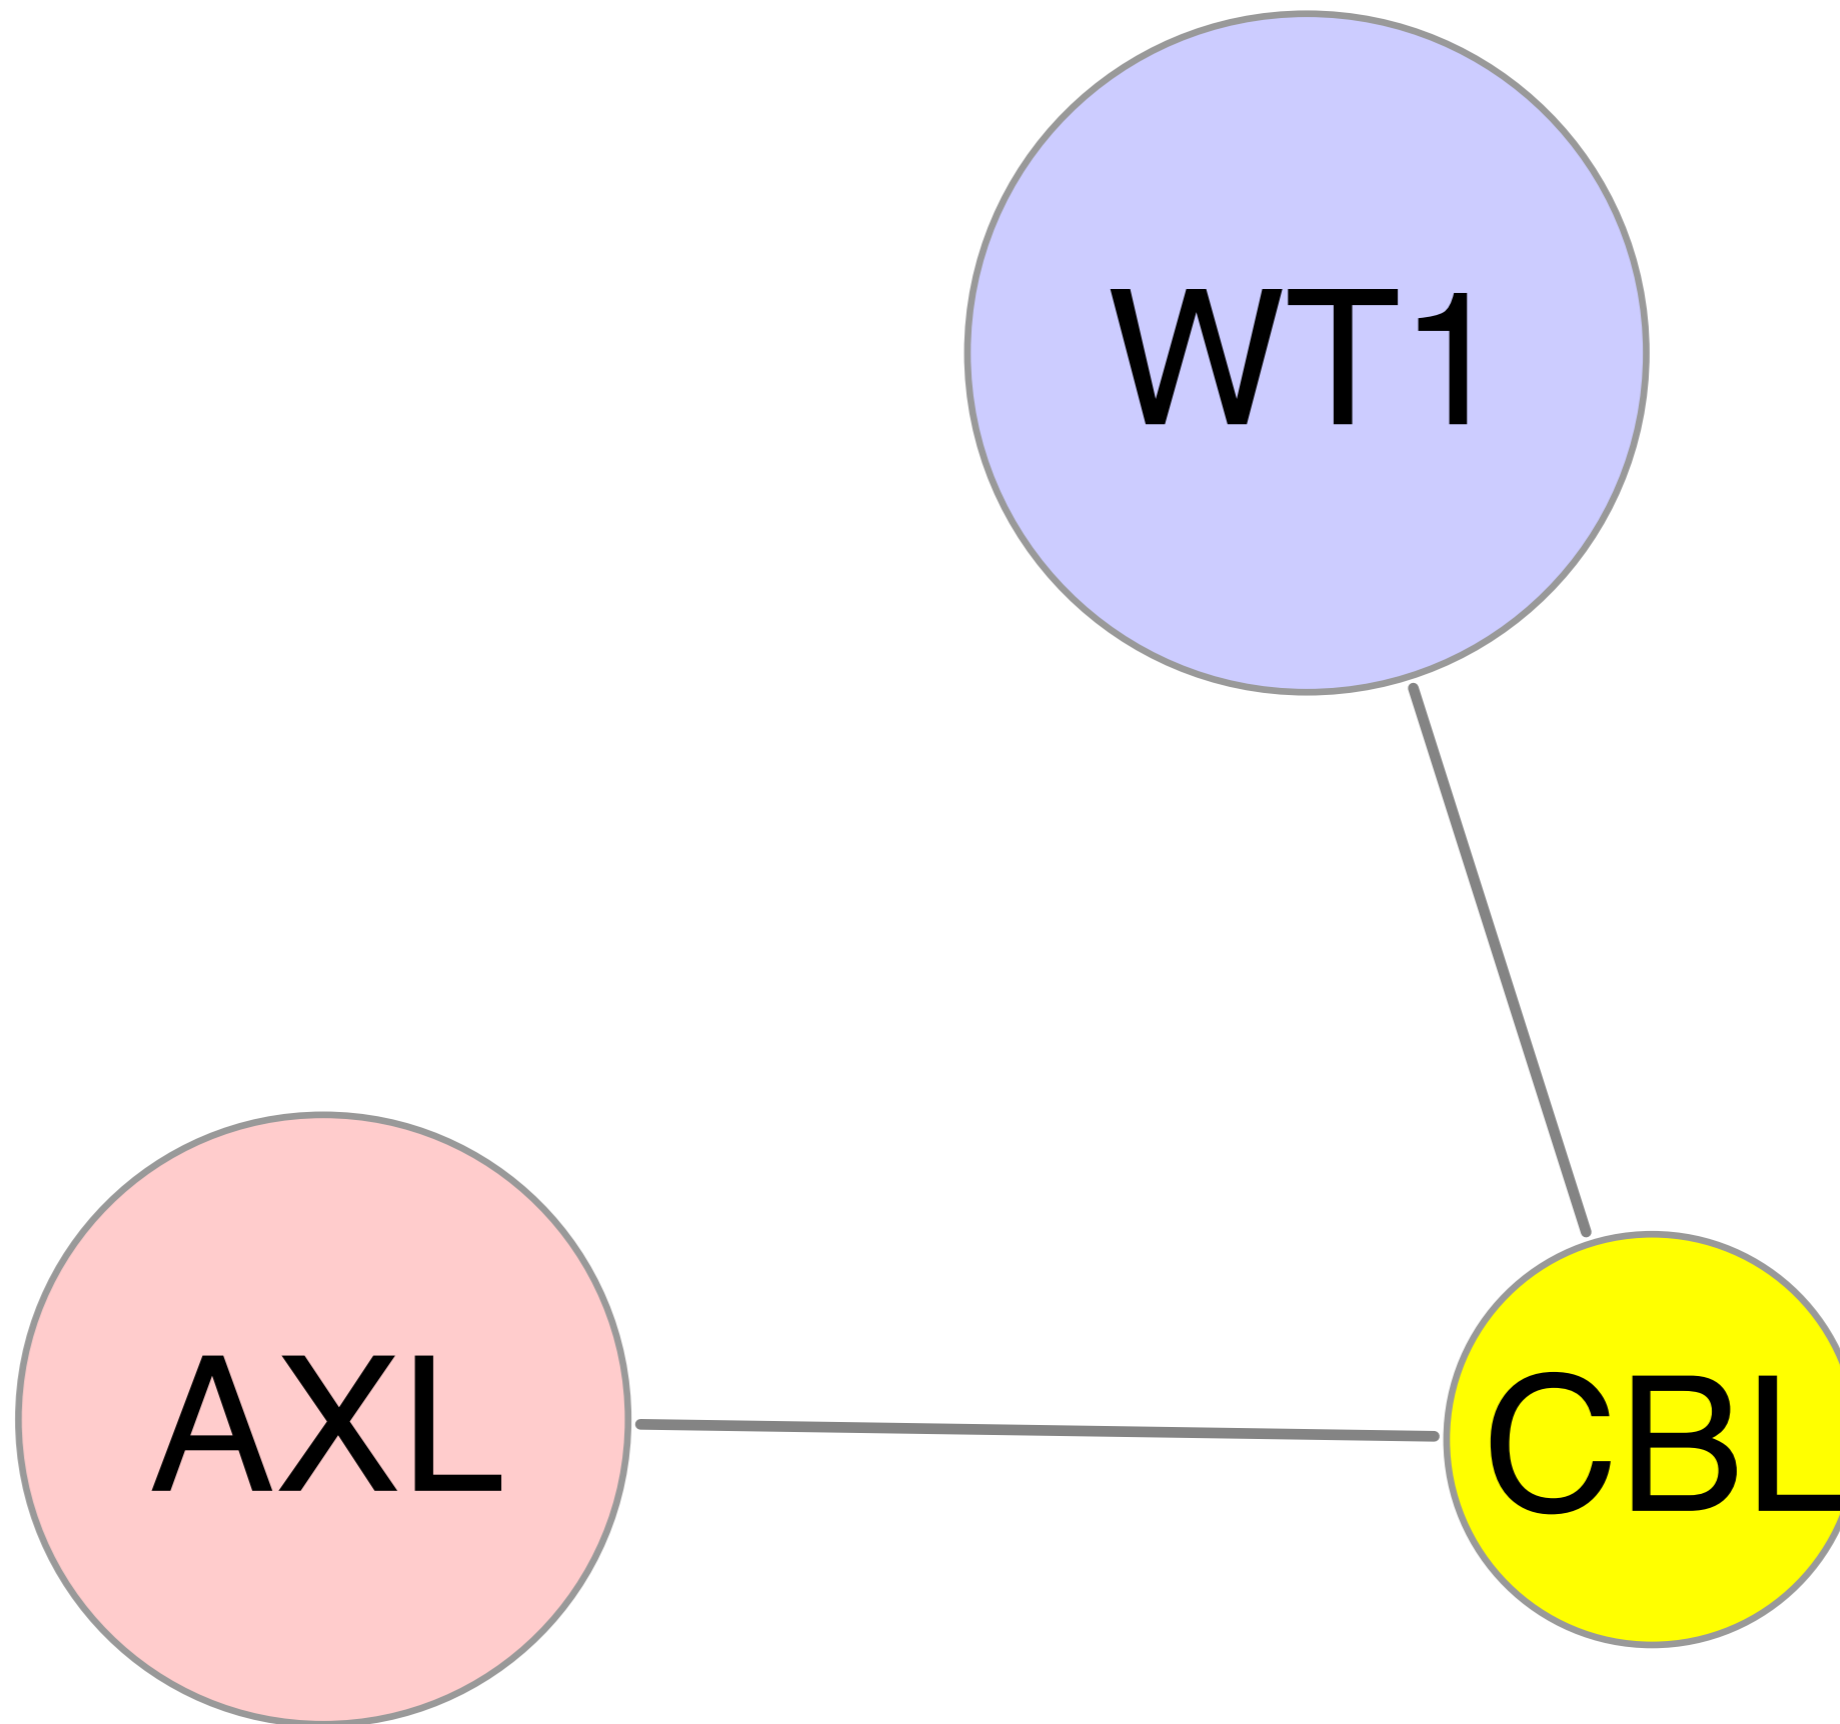

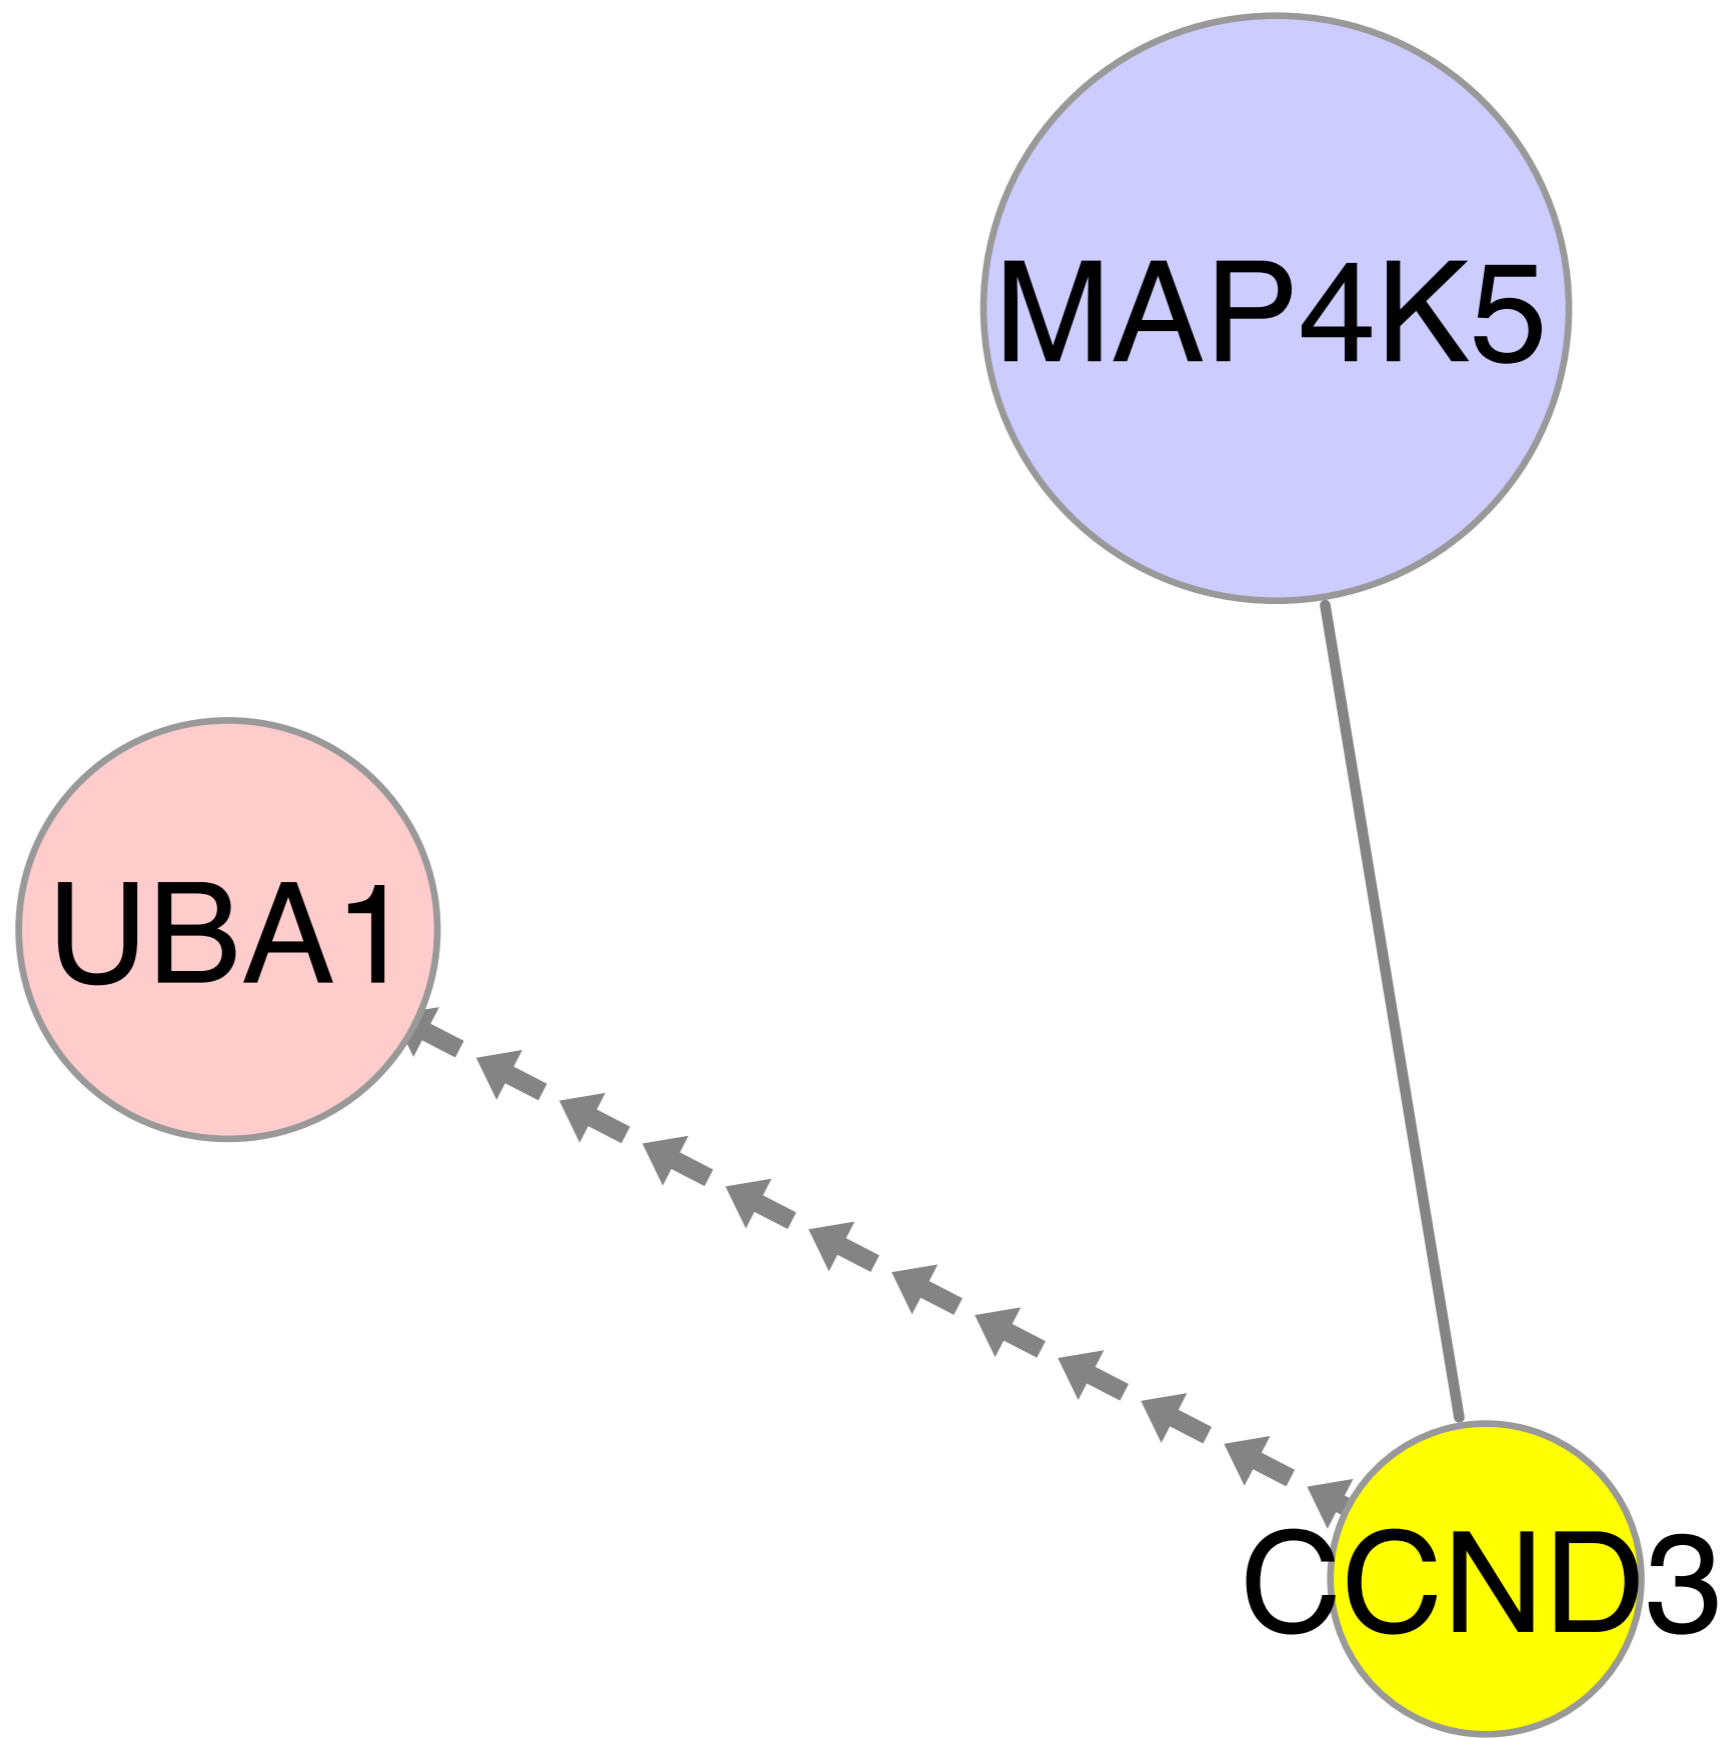

**CDKN1B**

**PTPN9**

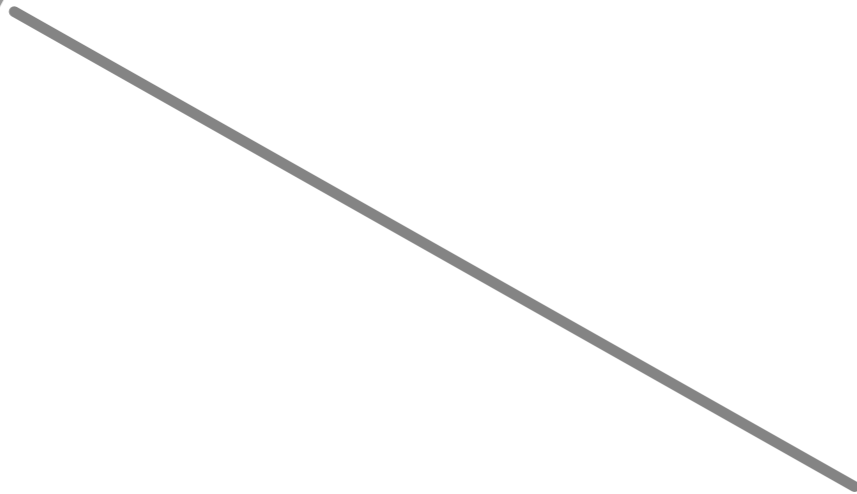

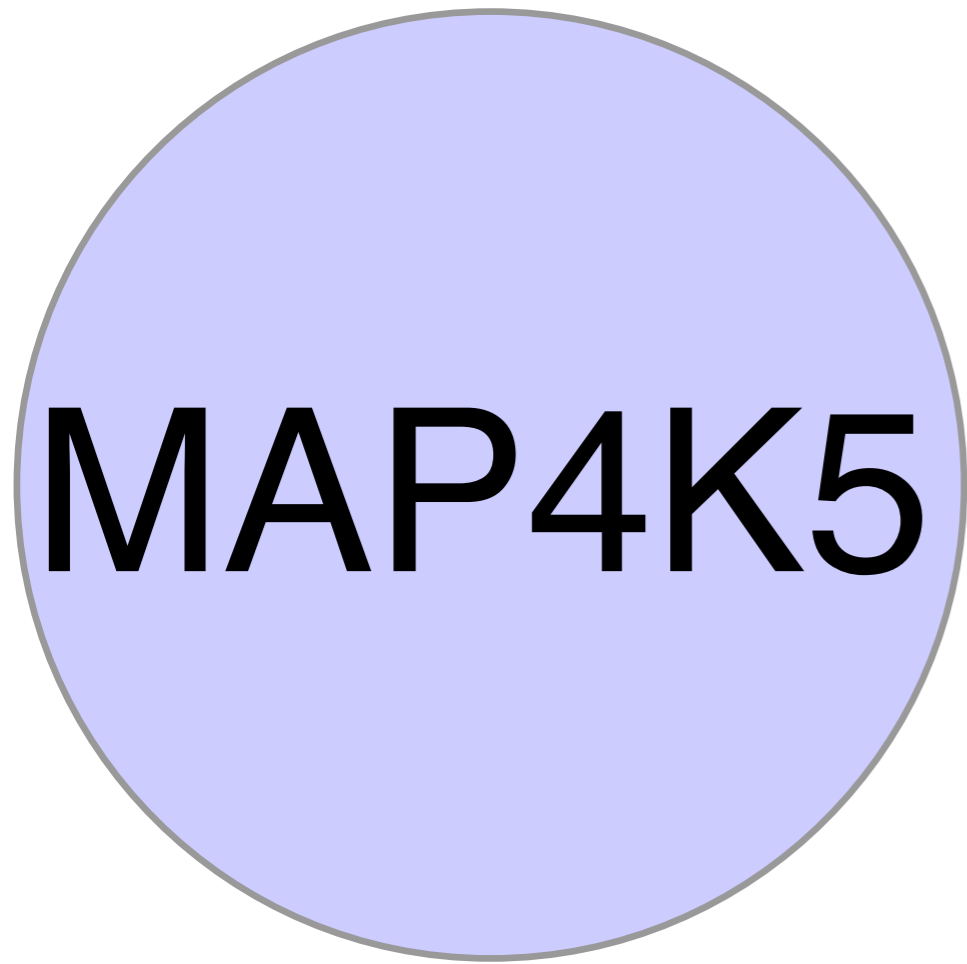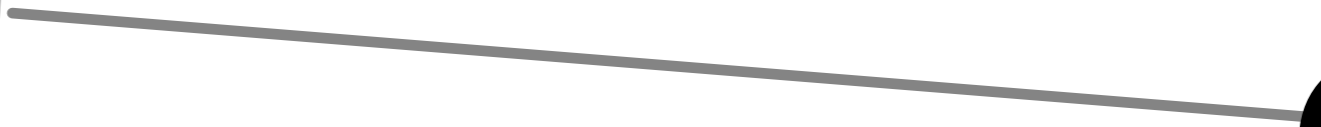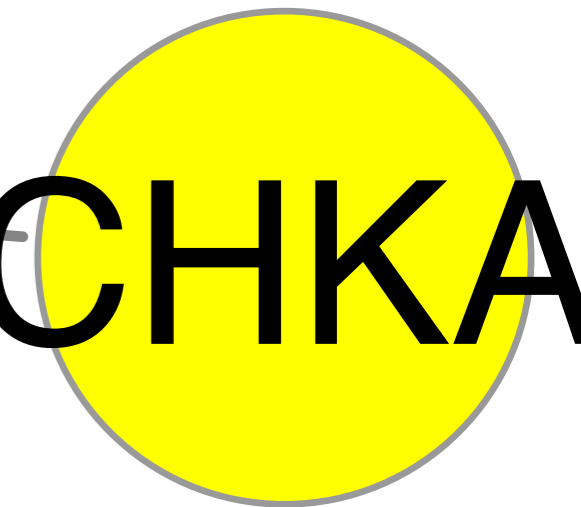

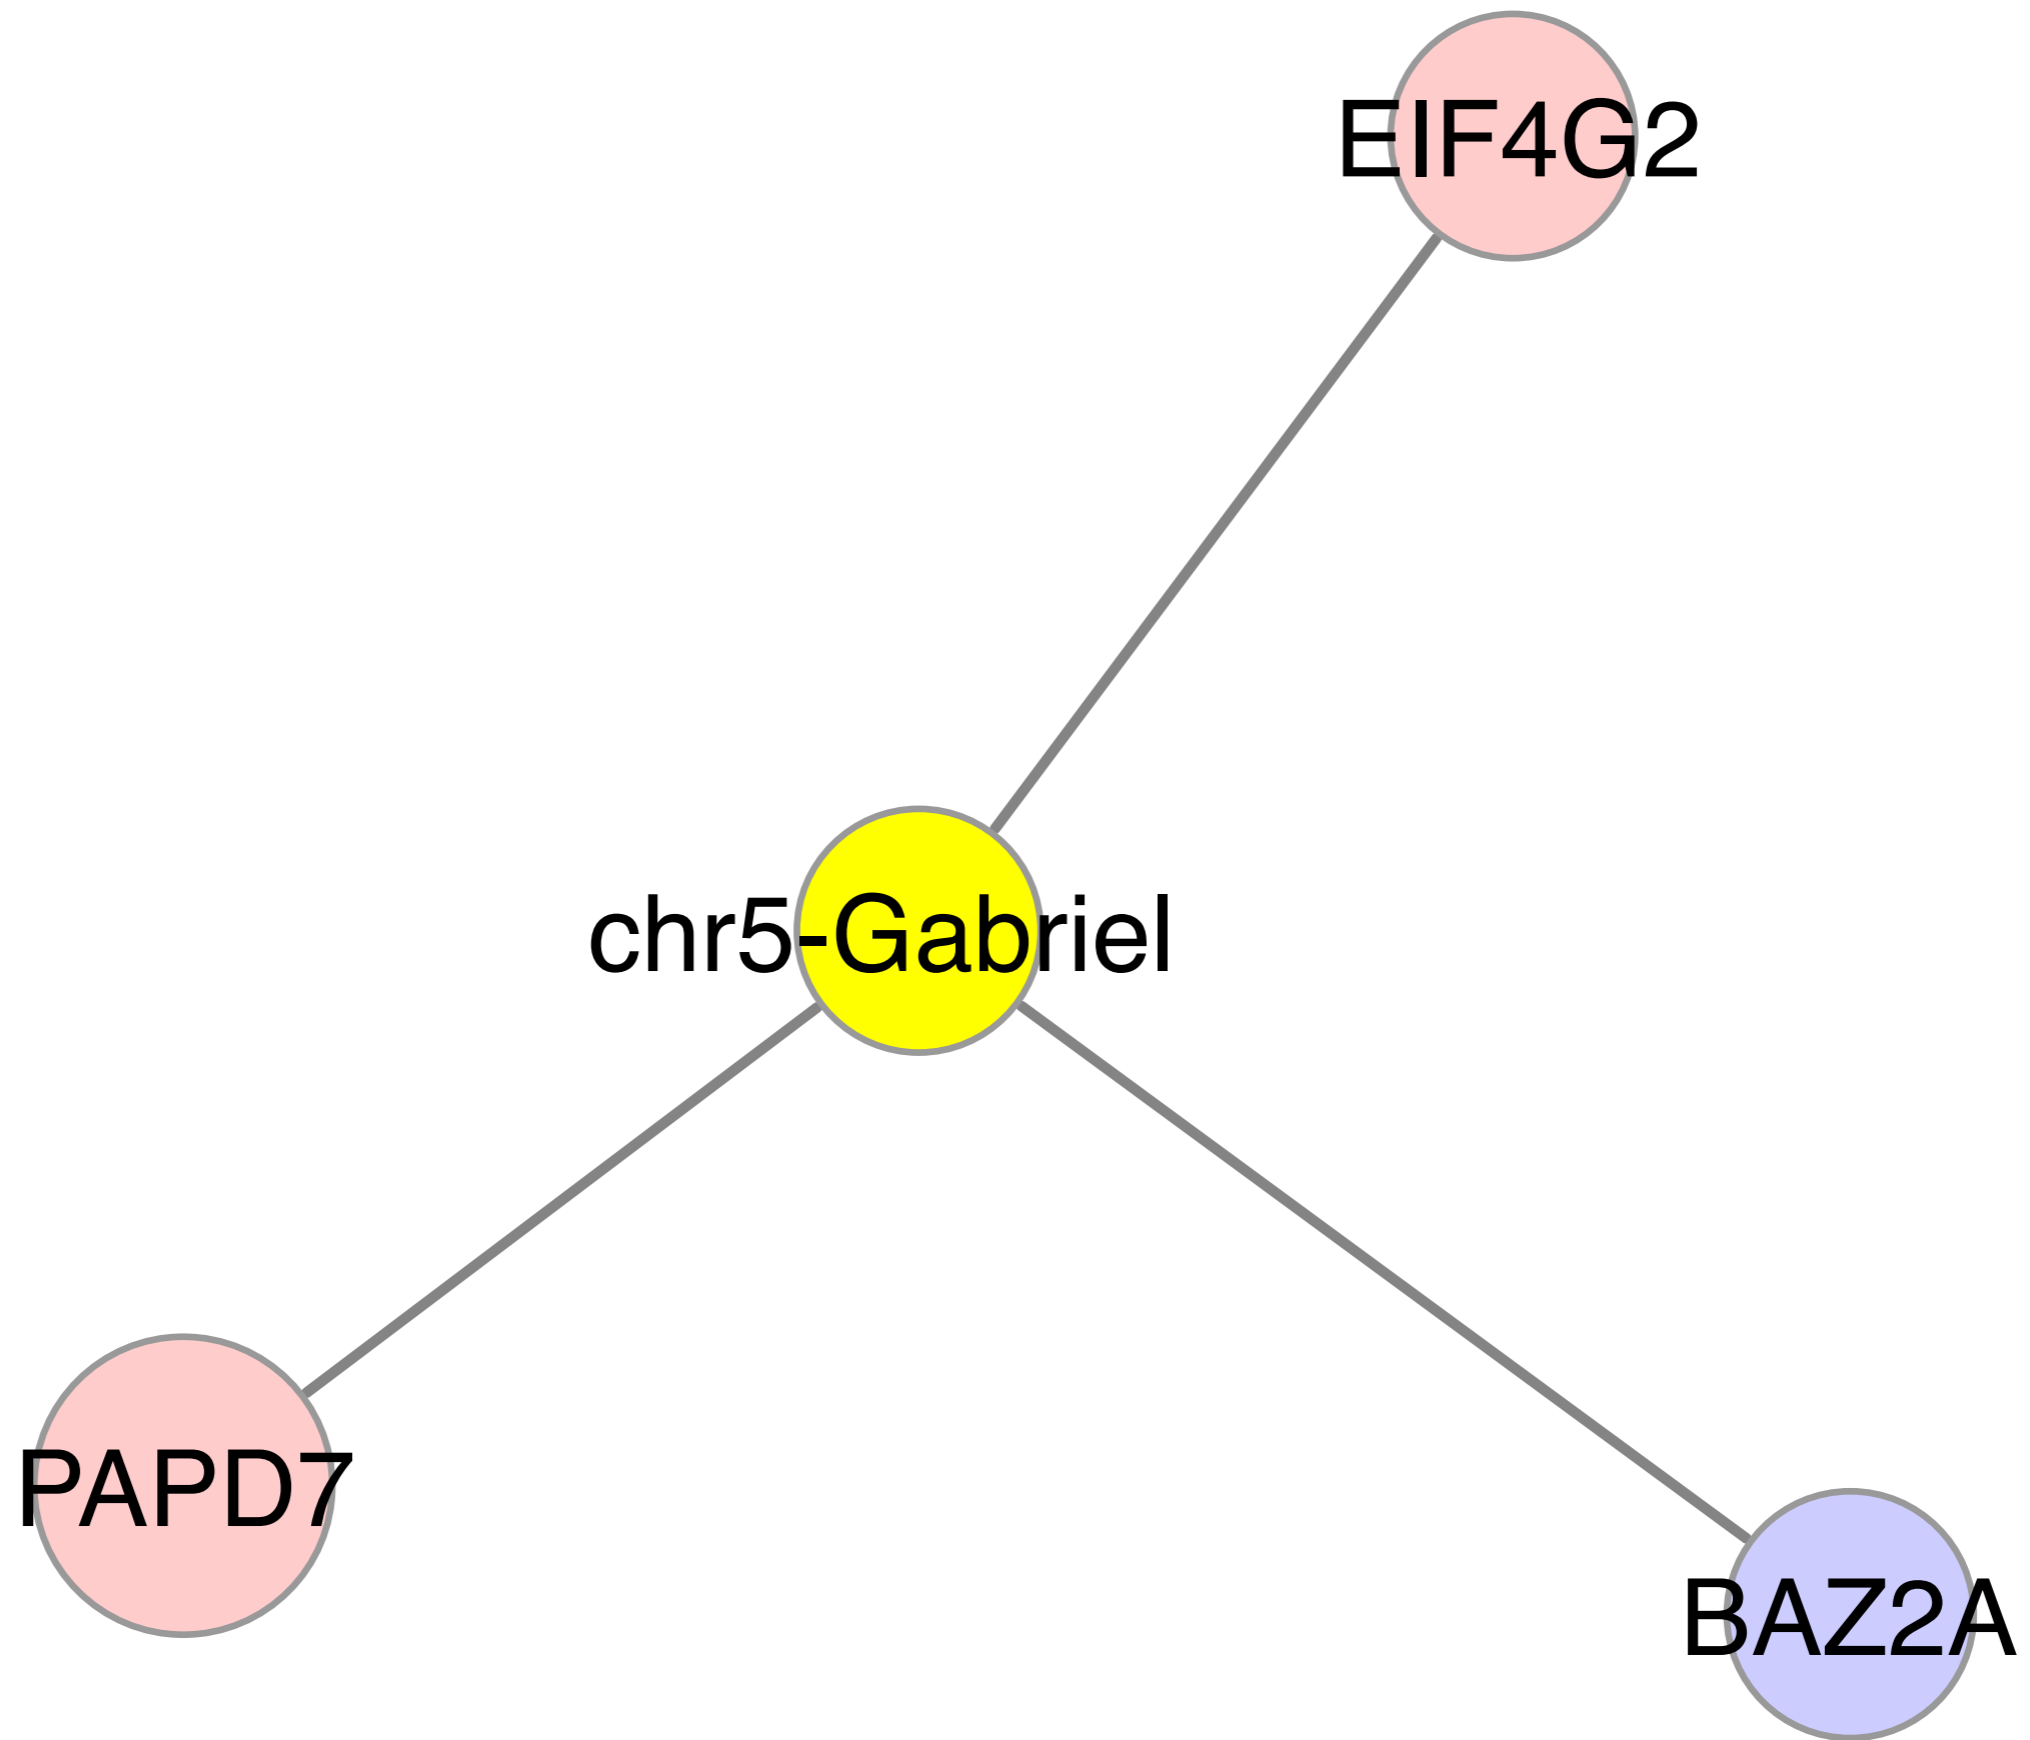

**CPSF2**

A yellow circle with a thin grey border, containing the text 'CPSF2' in bold black font.

**REST**

A pink circle with a thin grey border, containing the text 'REST' in bold black font.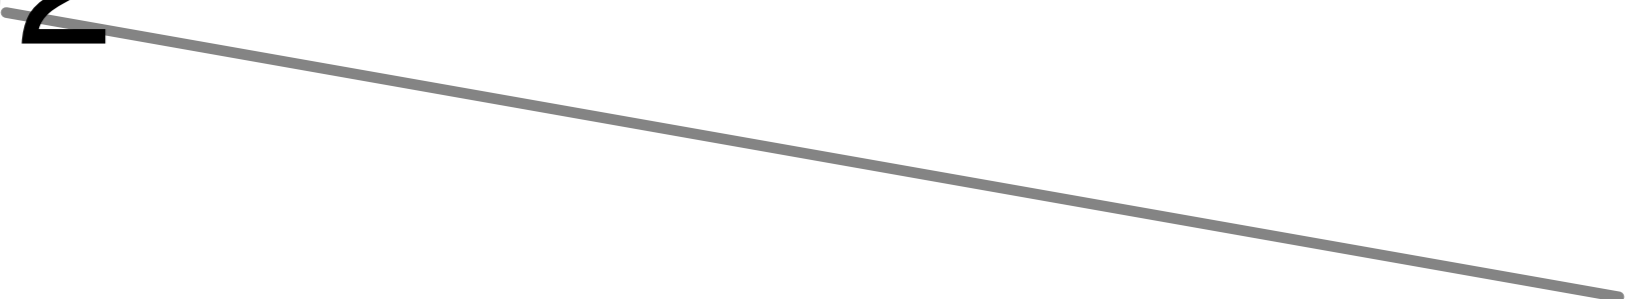

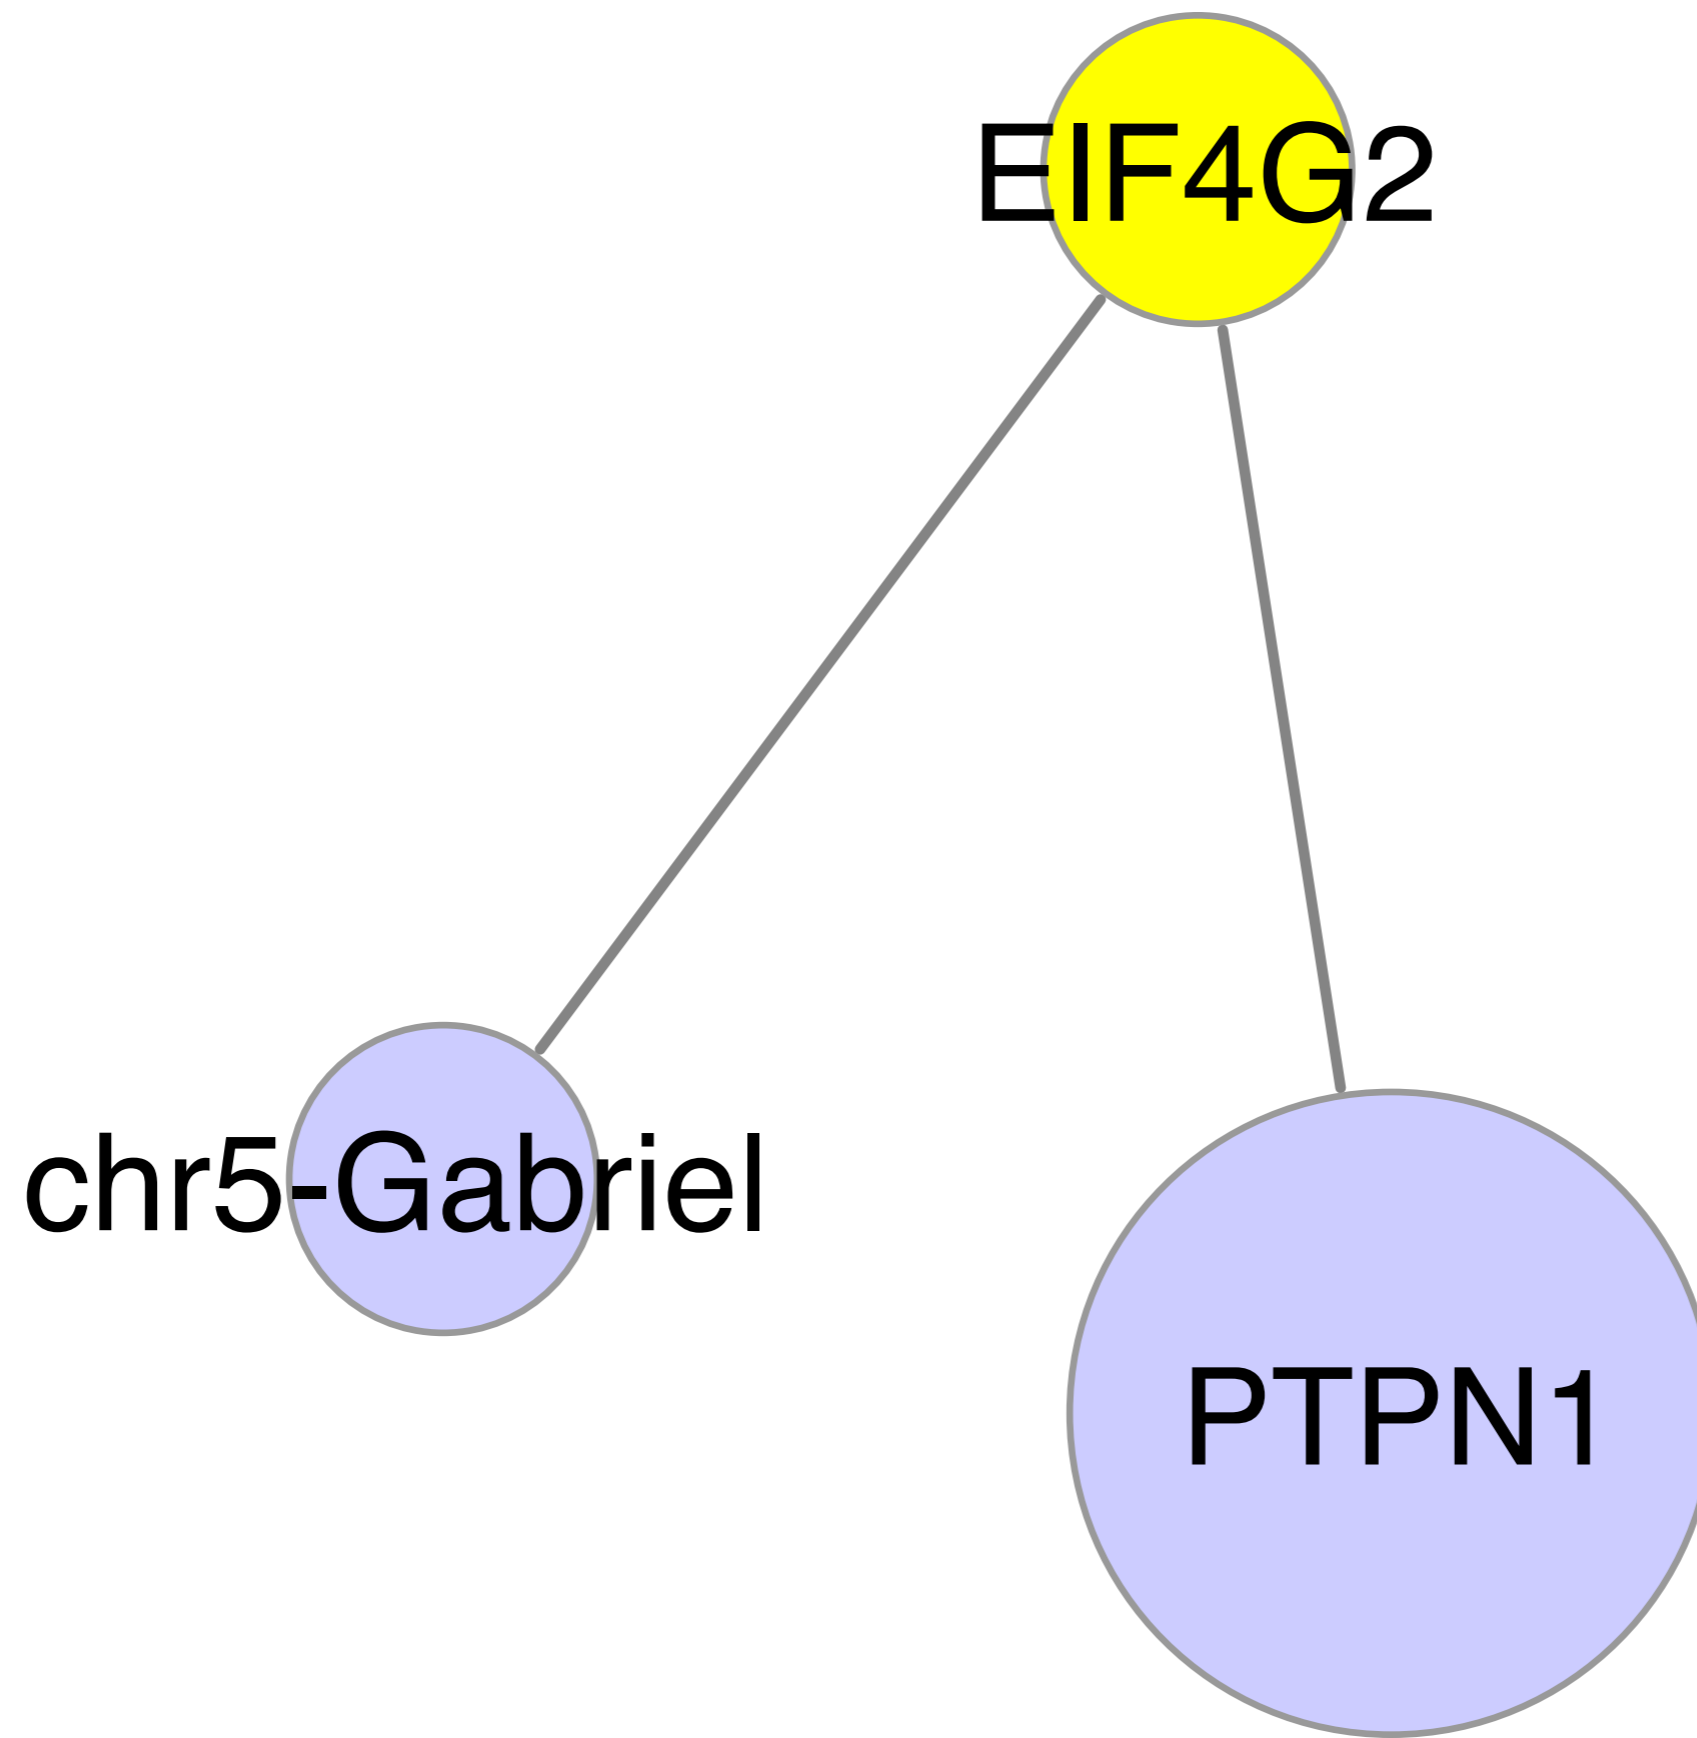



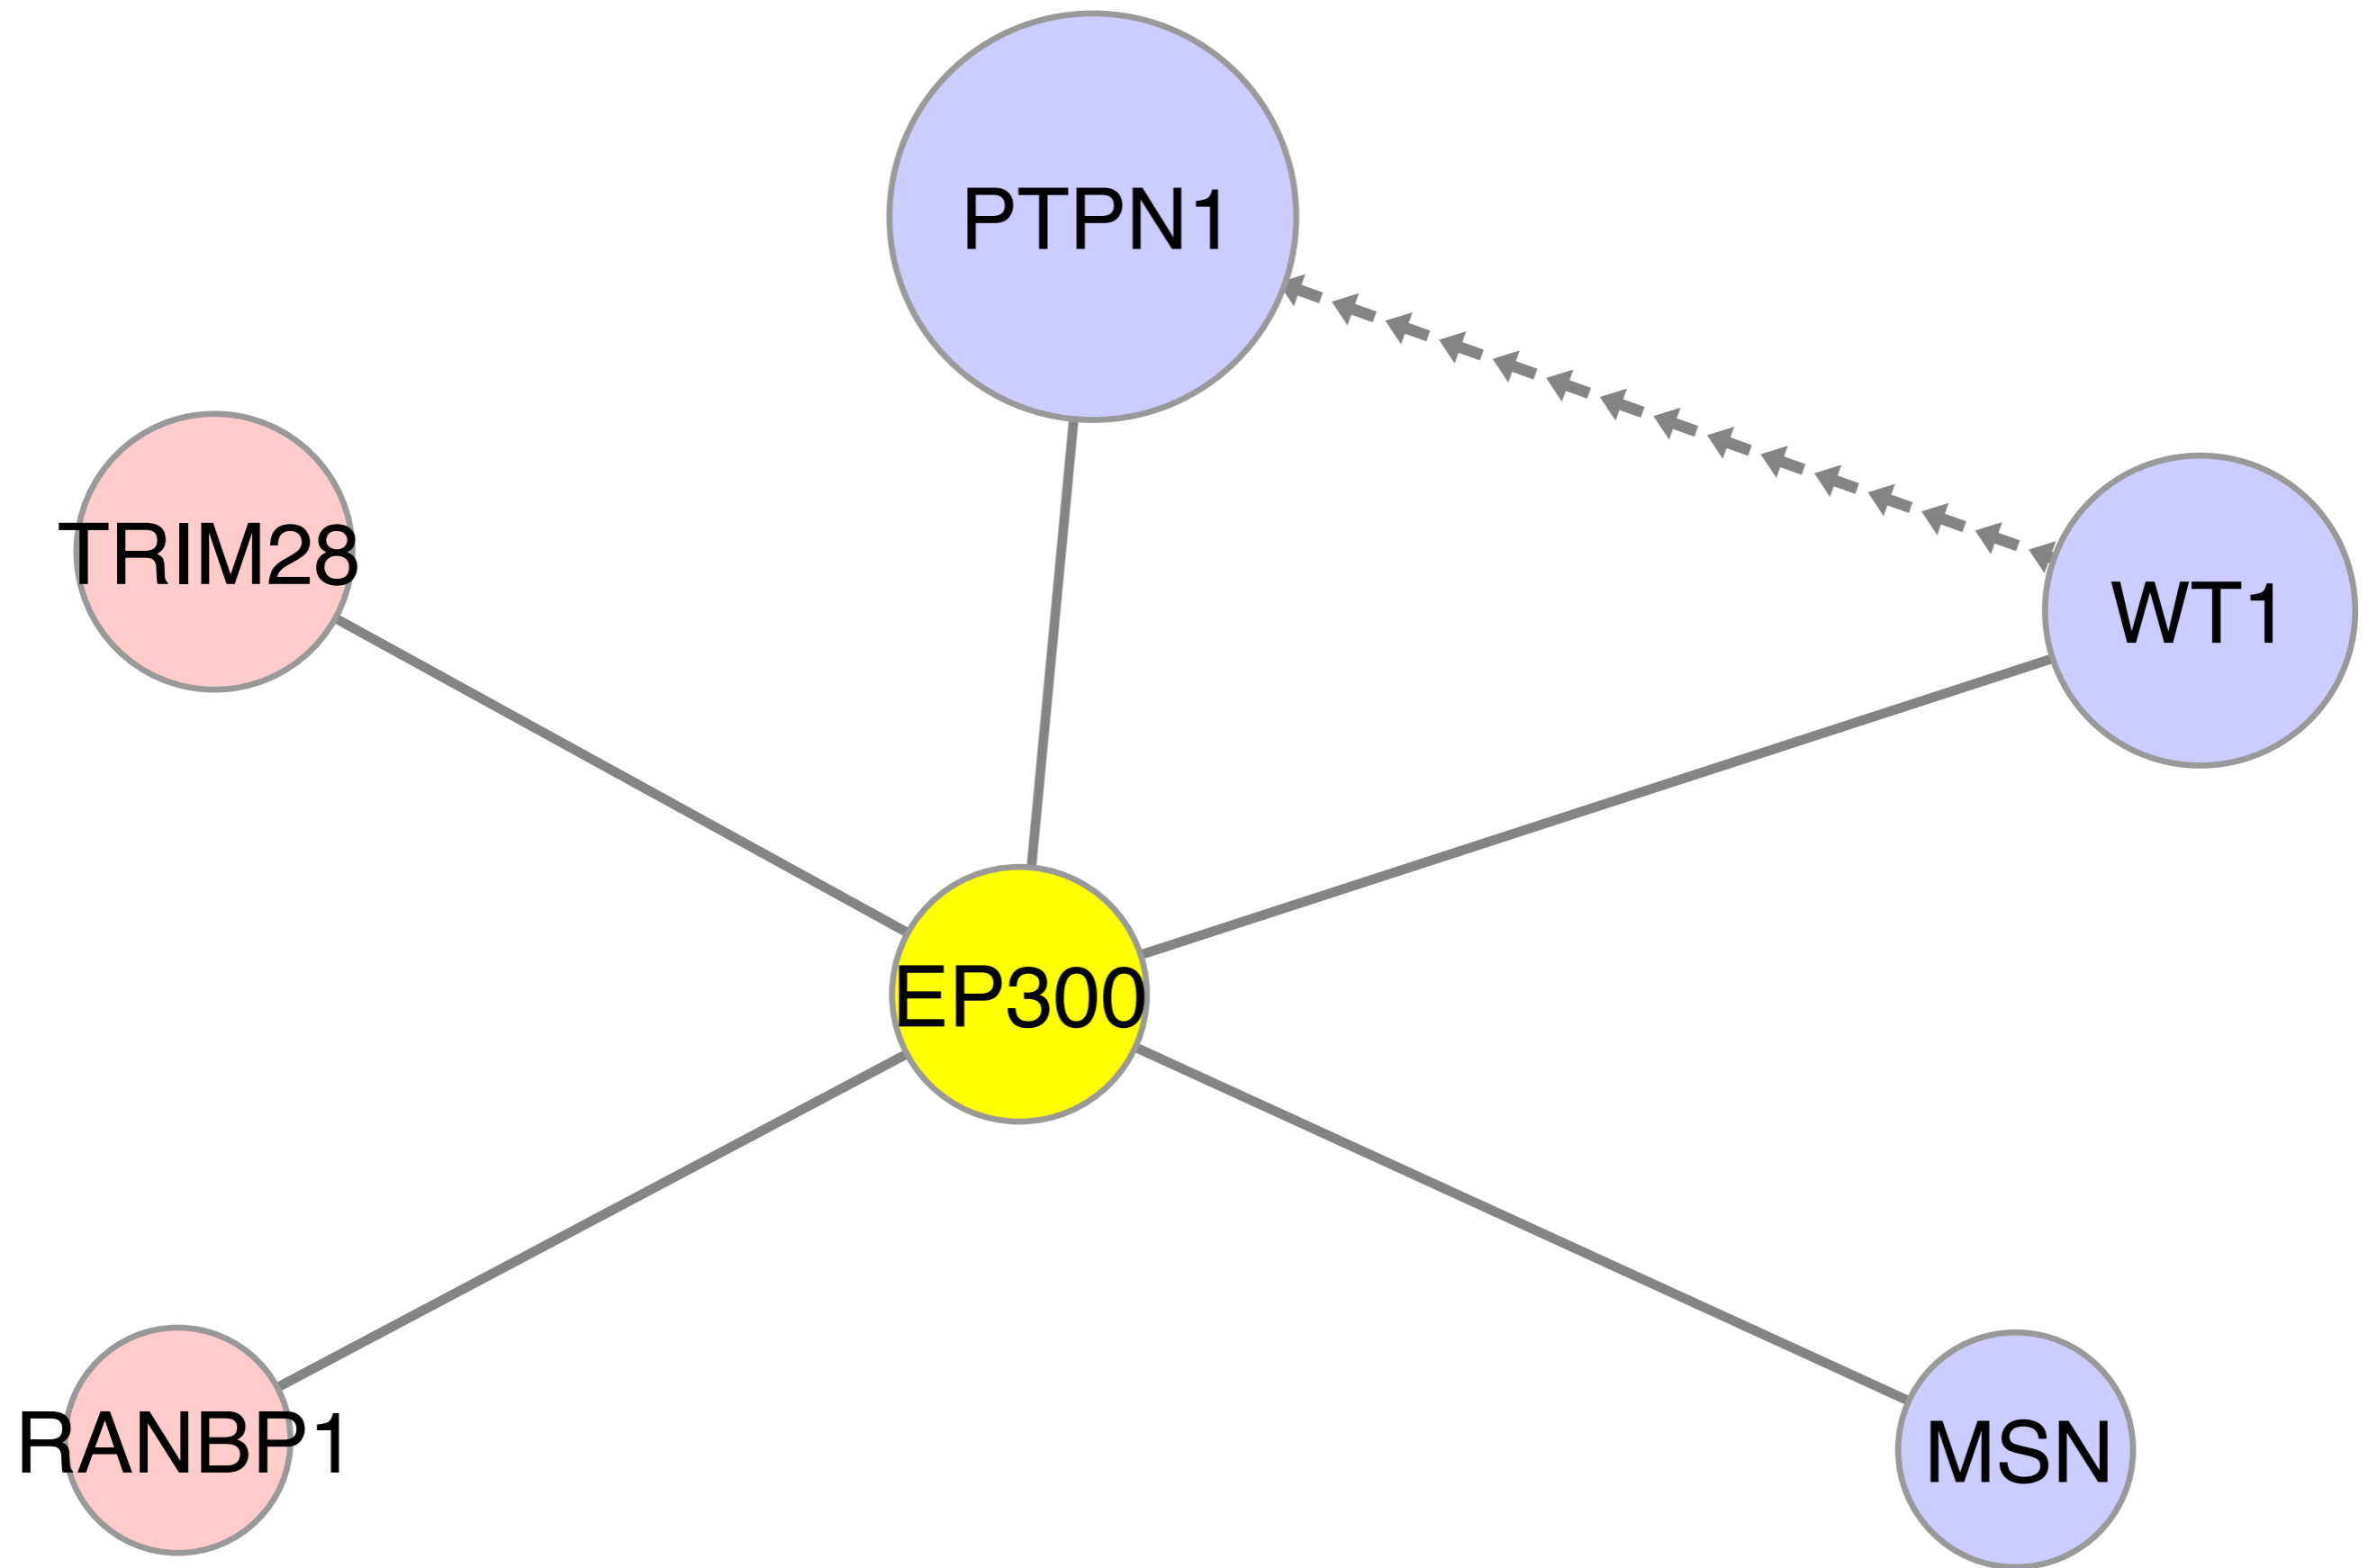

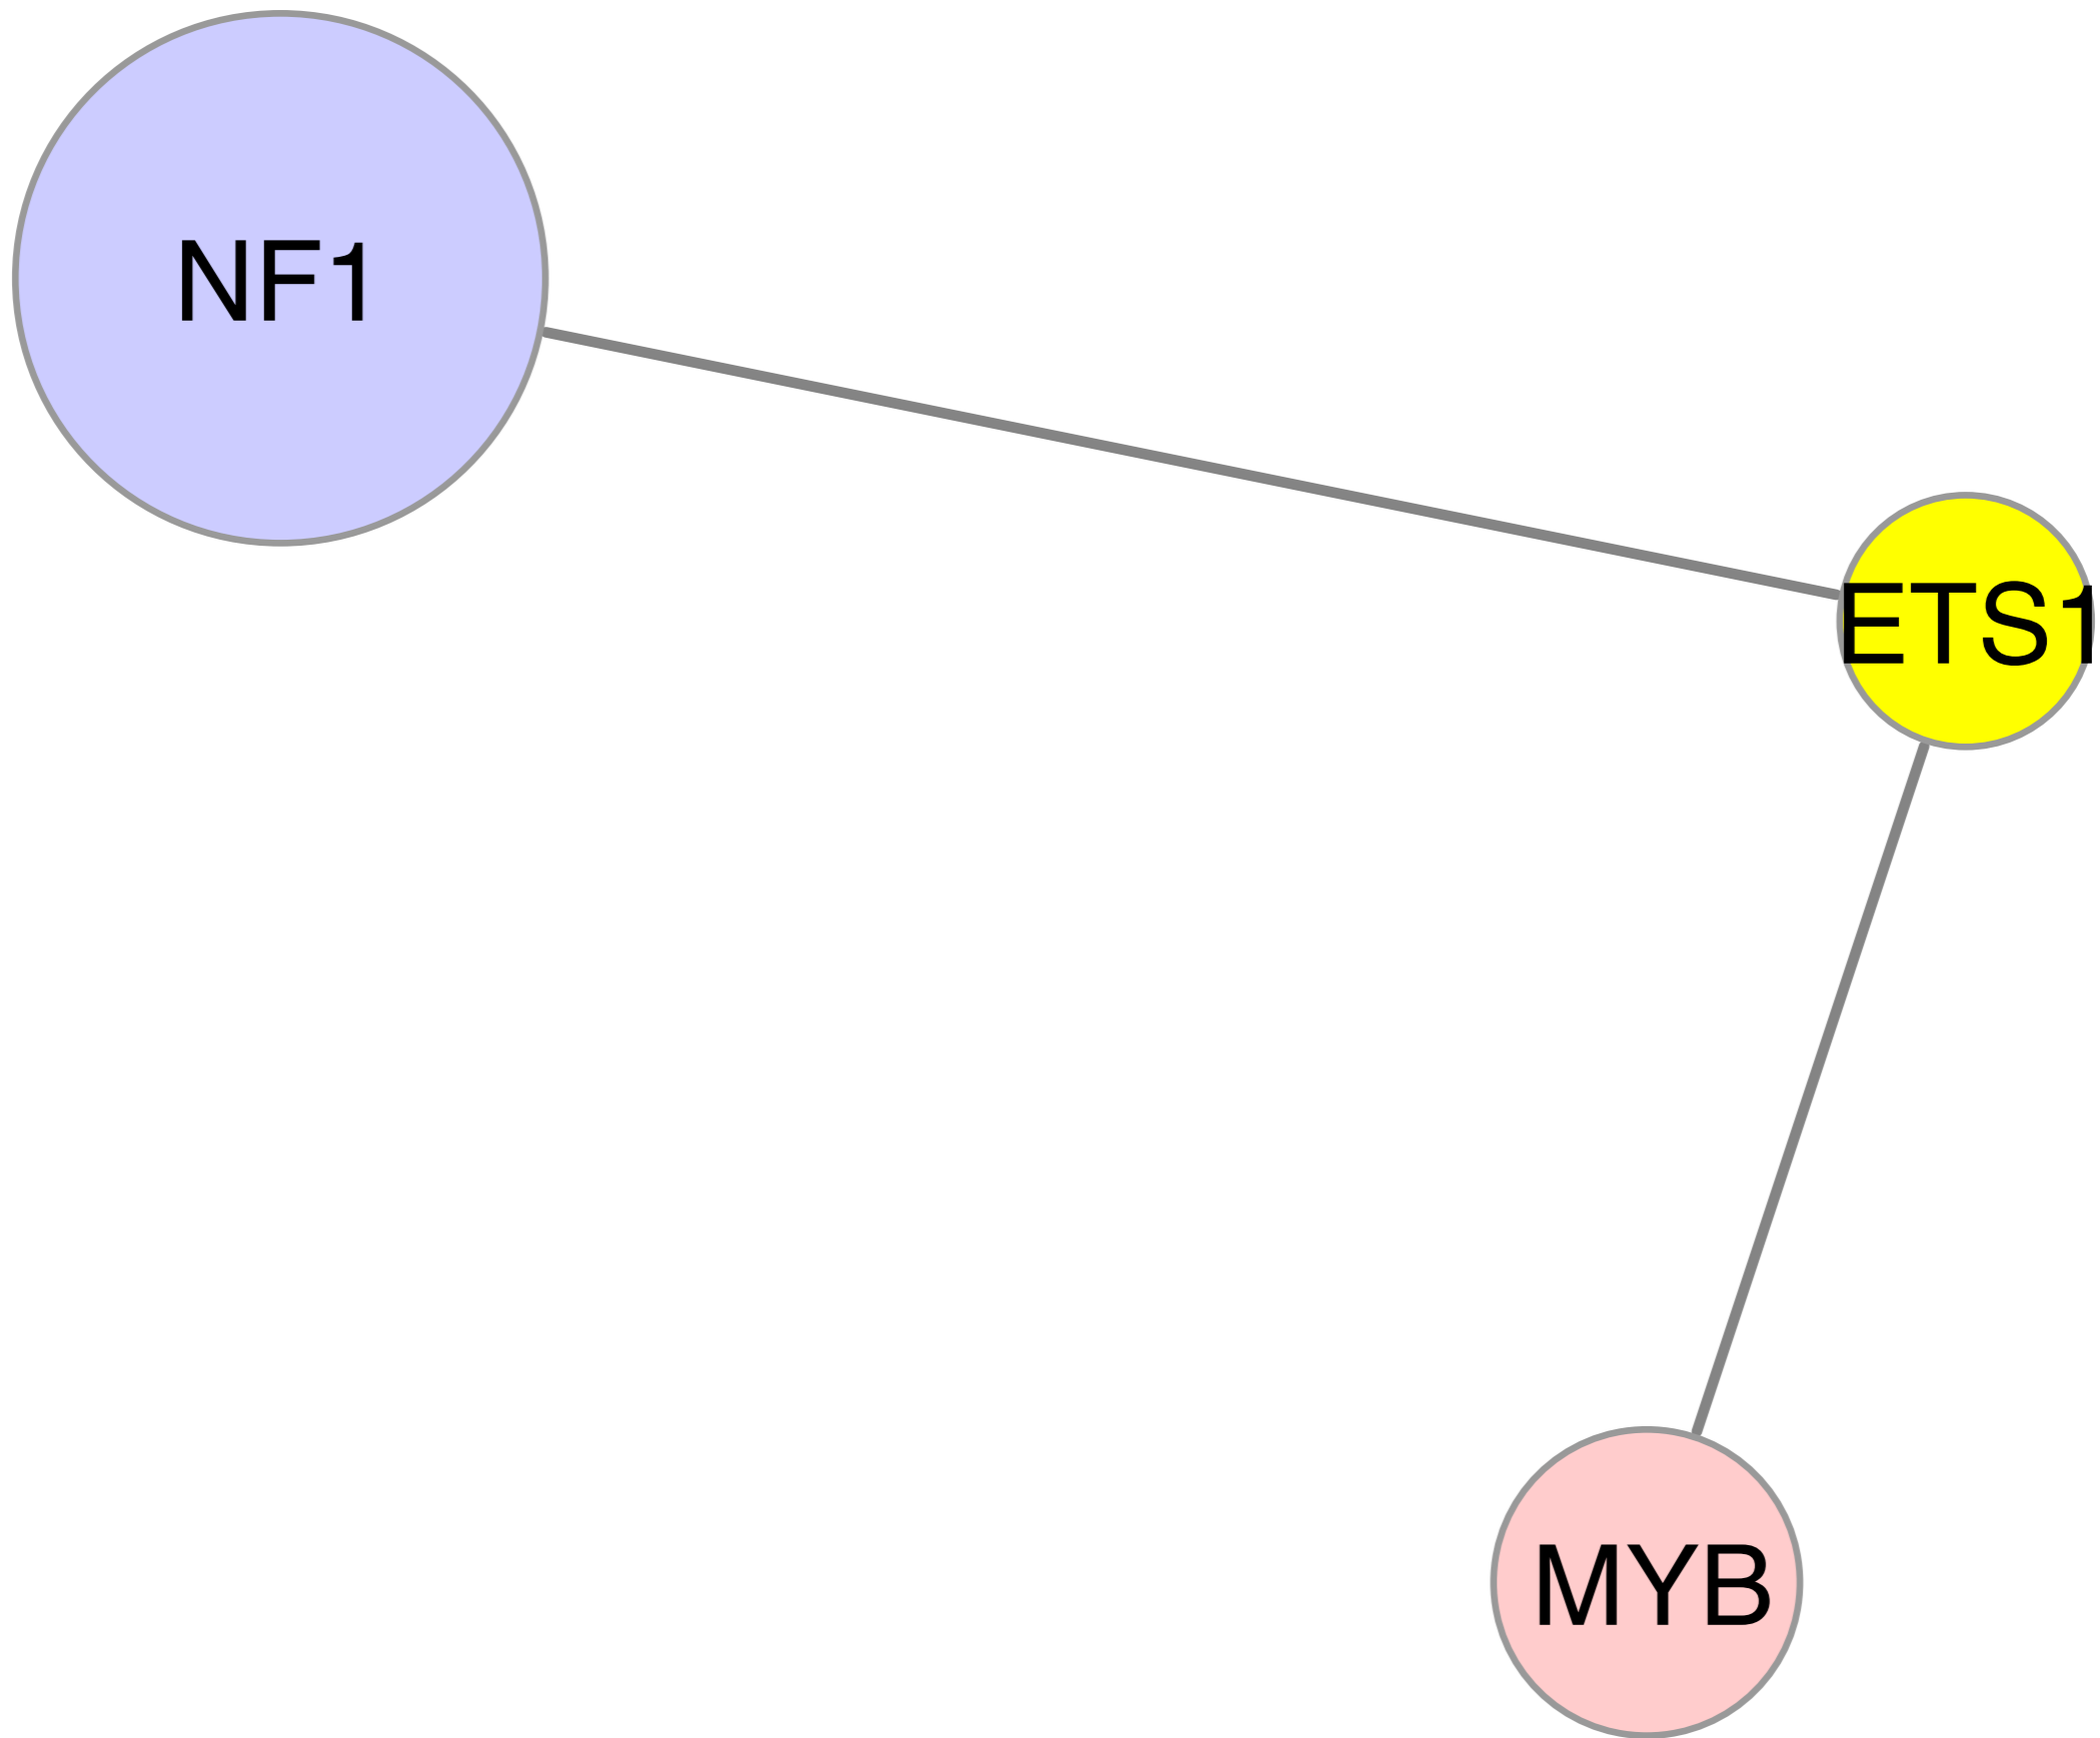

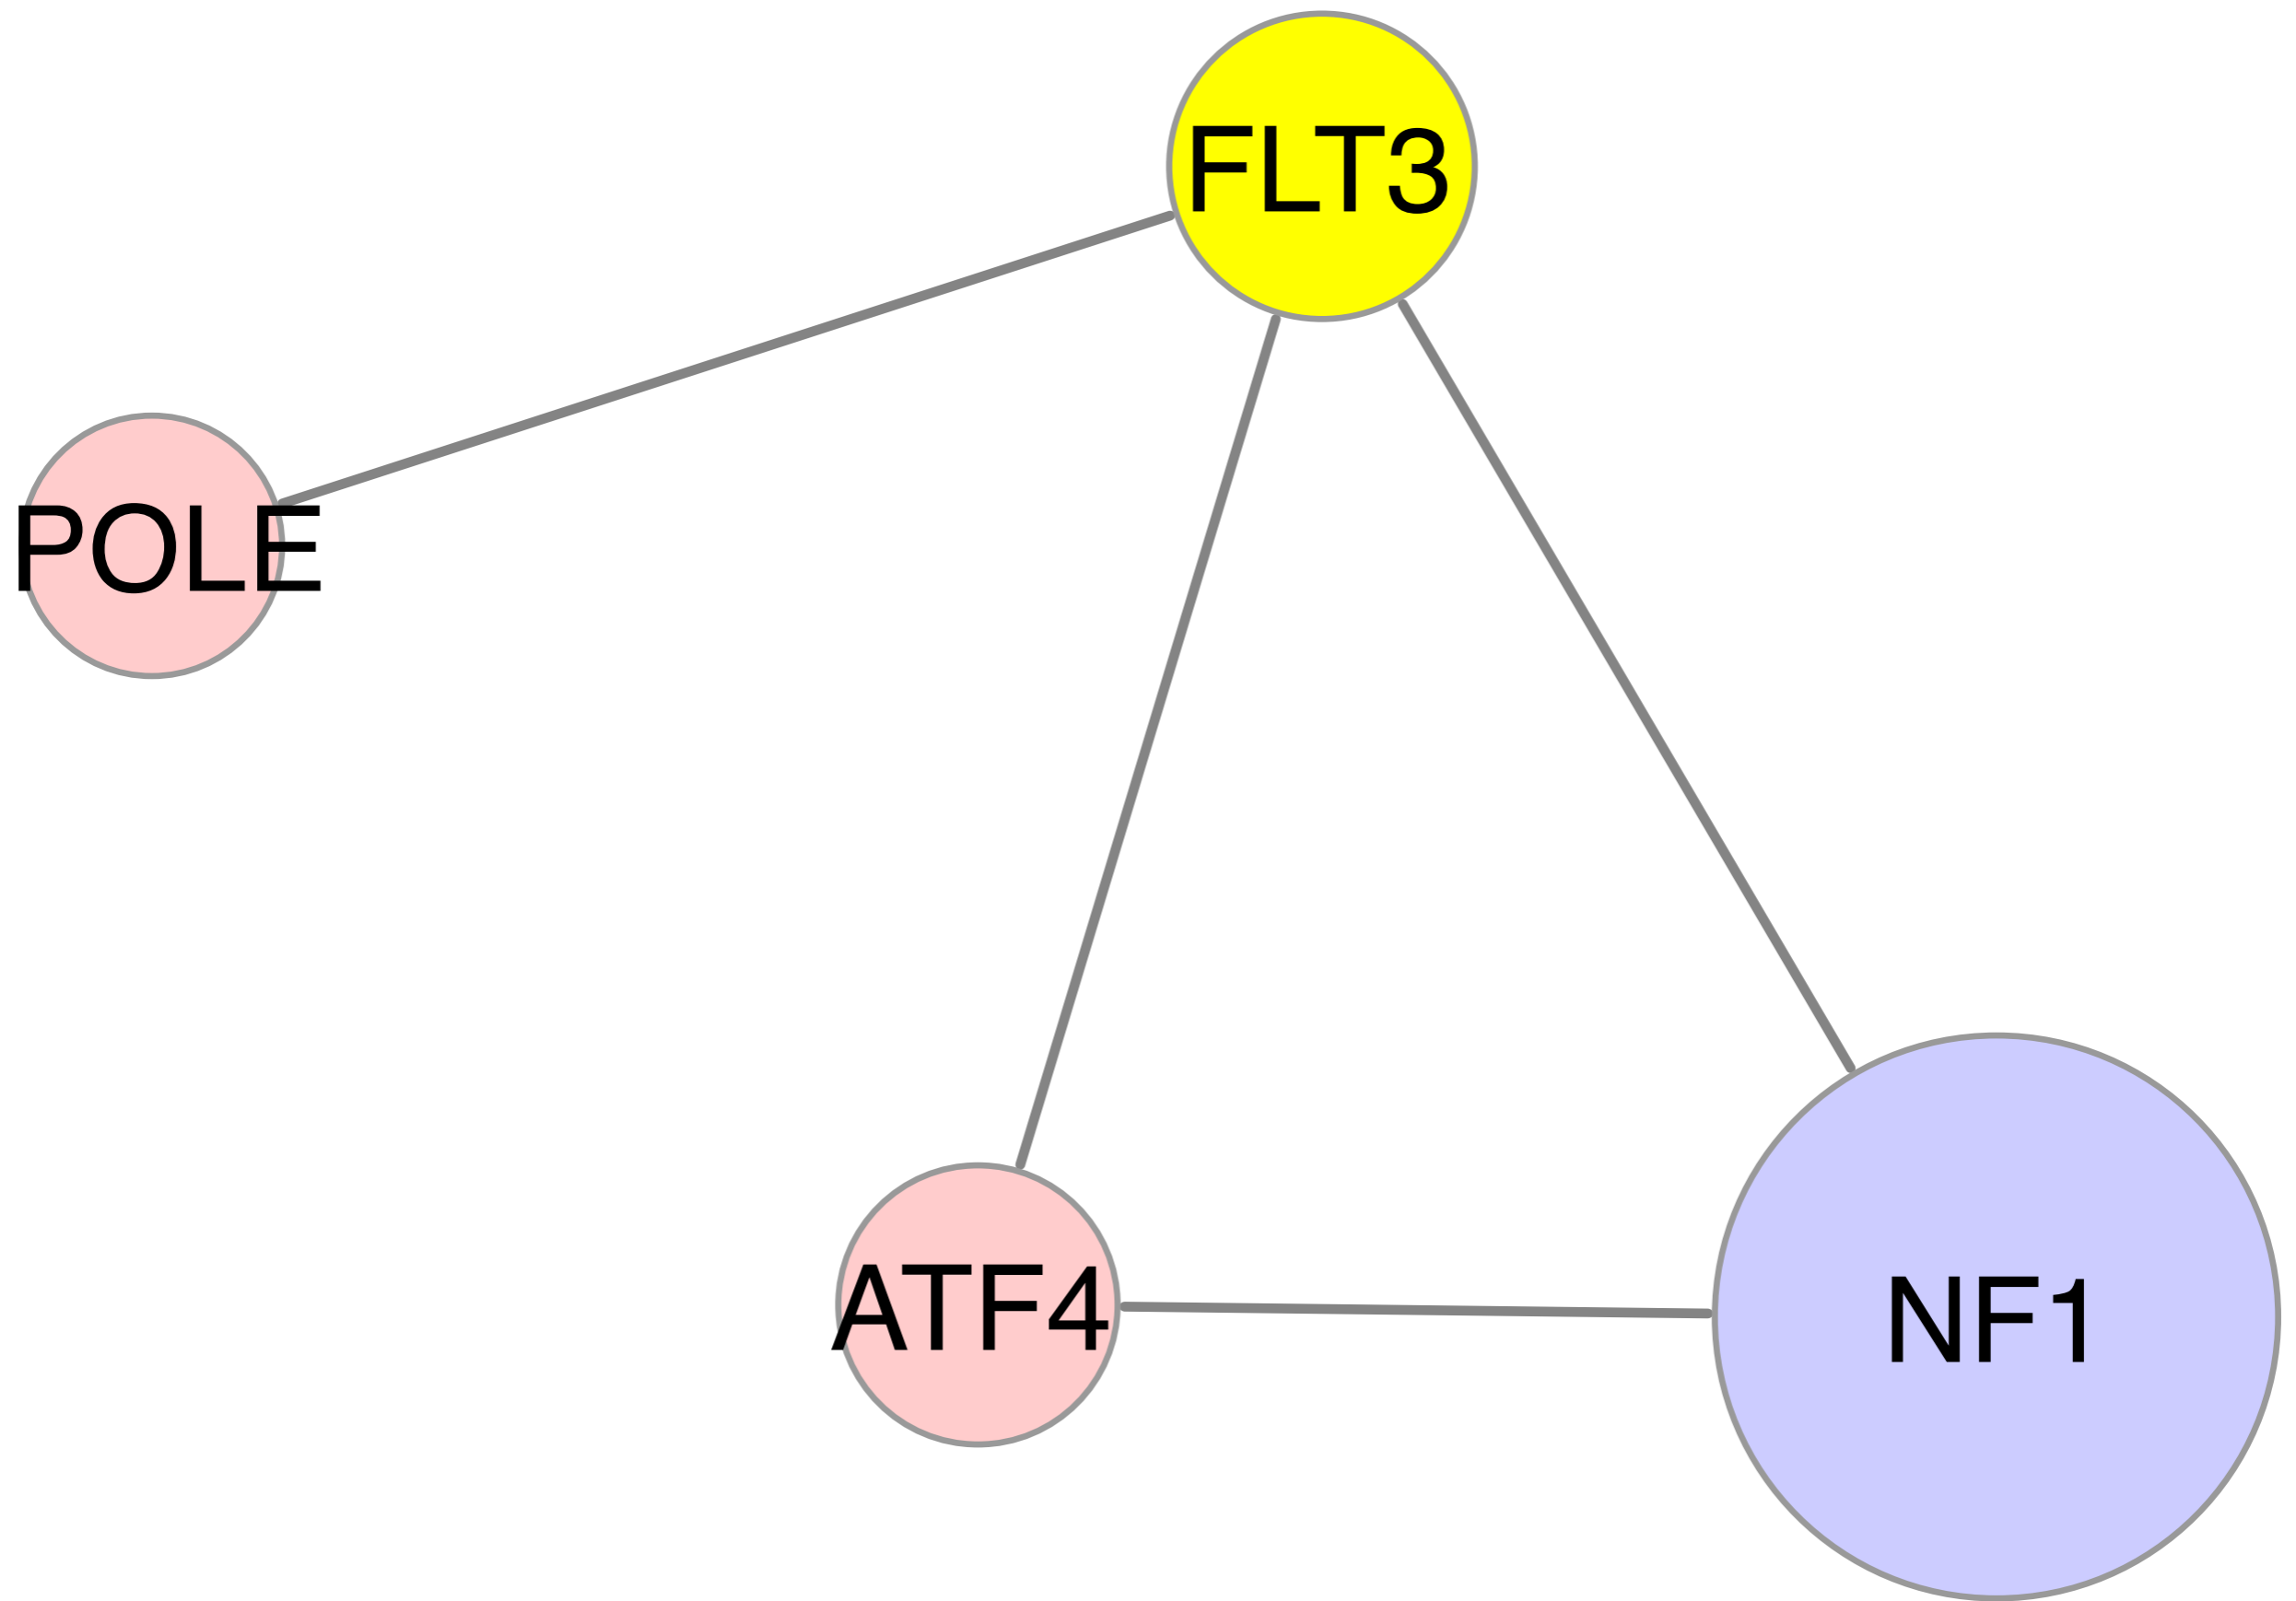

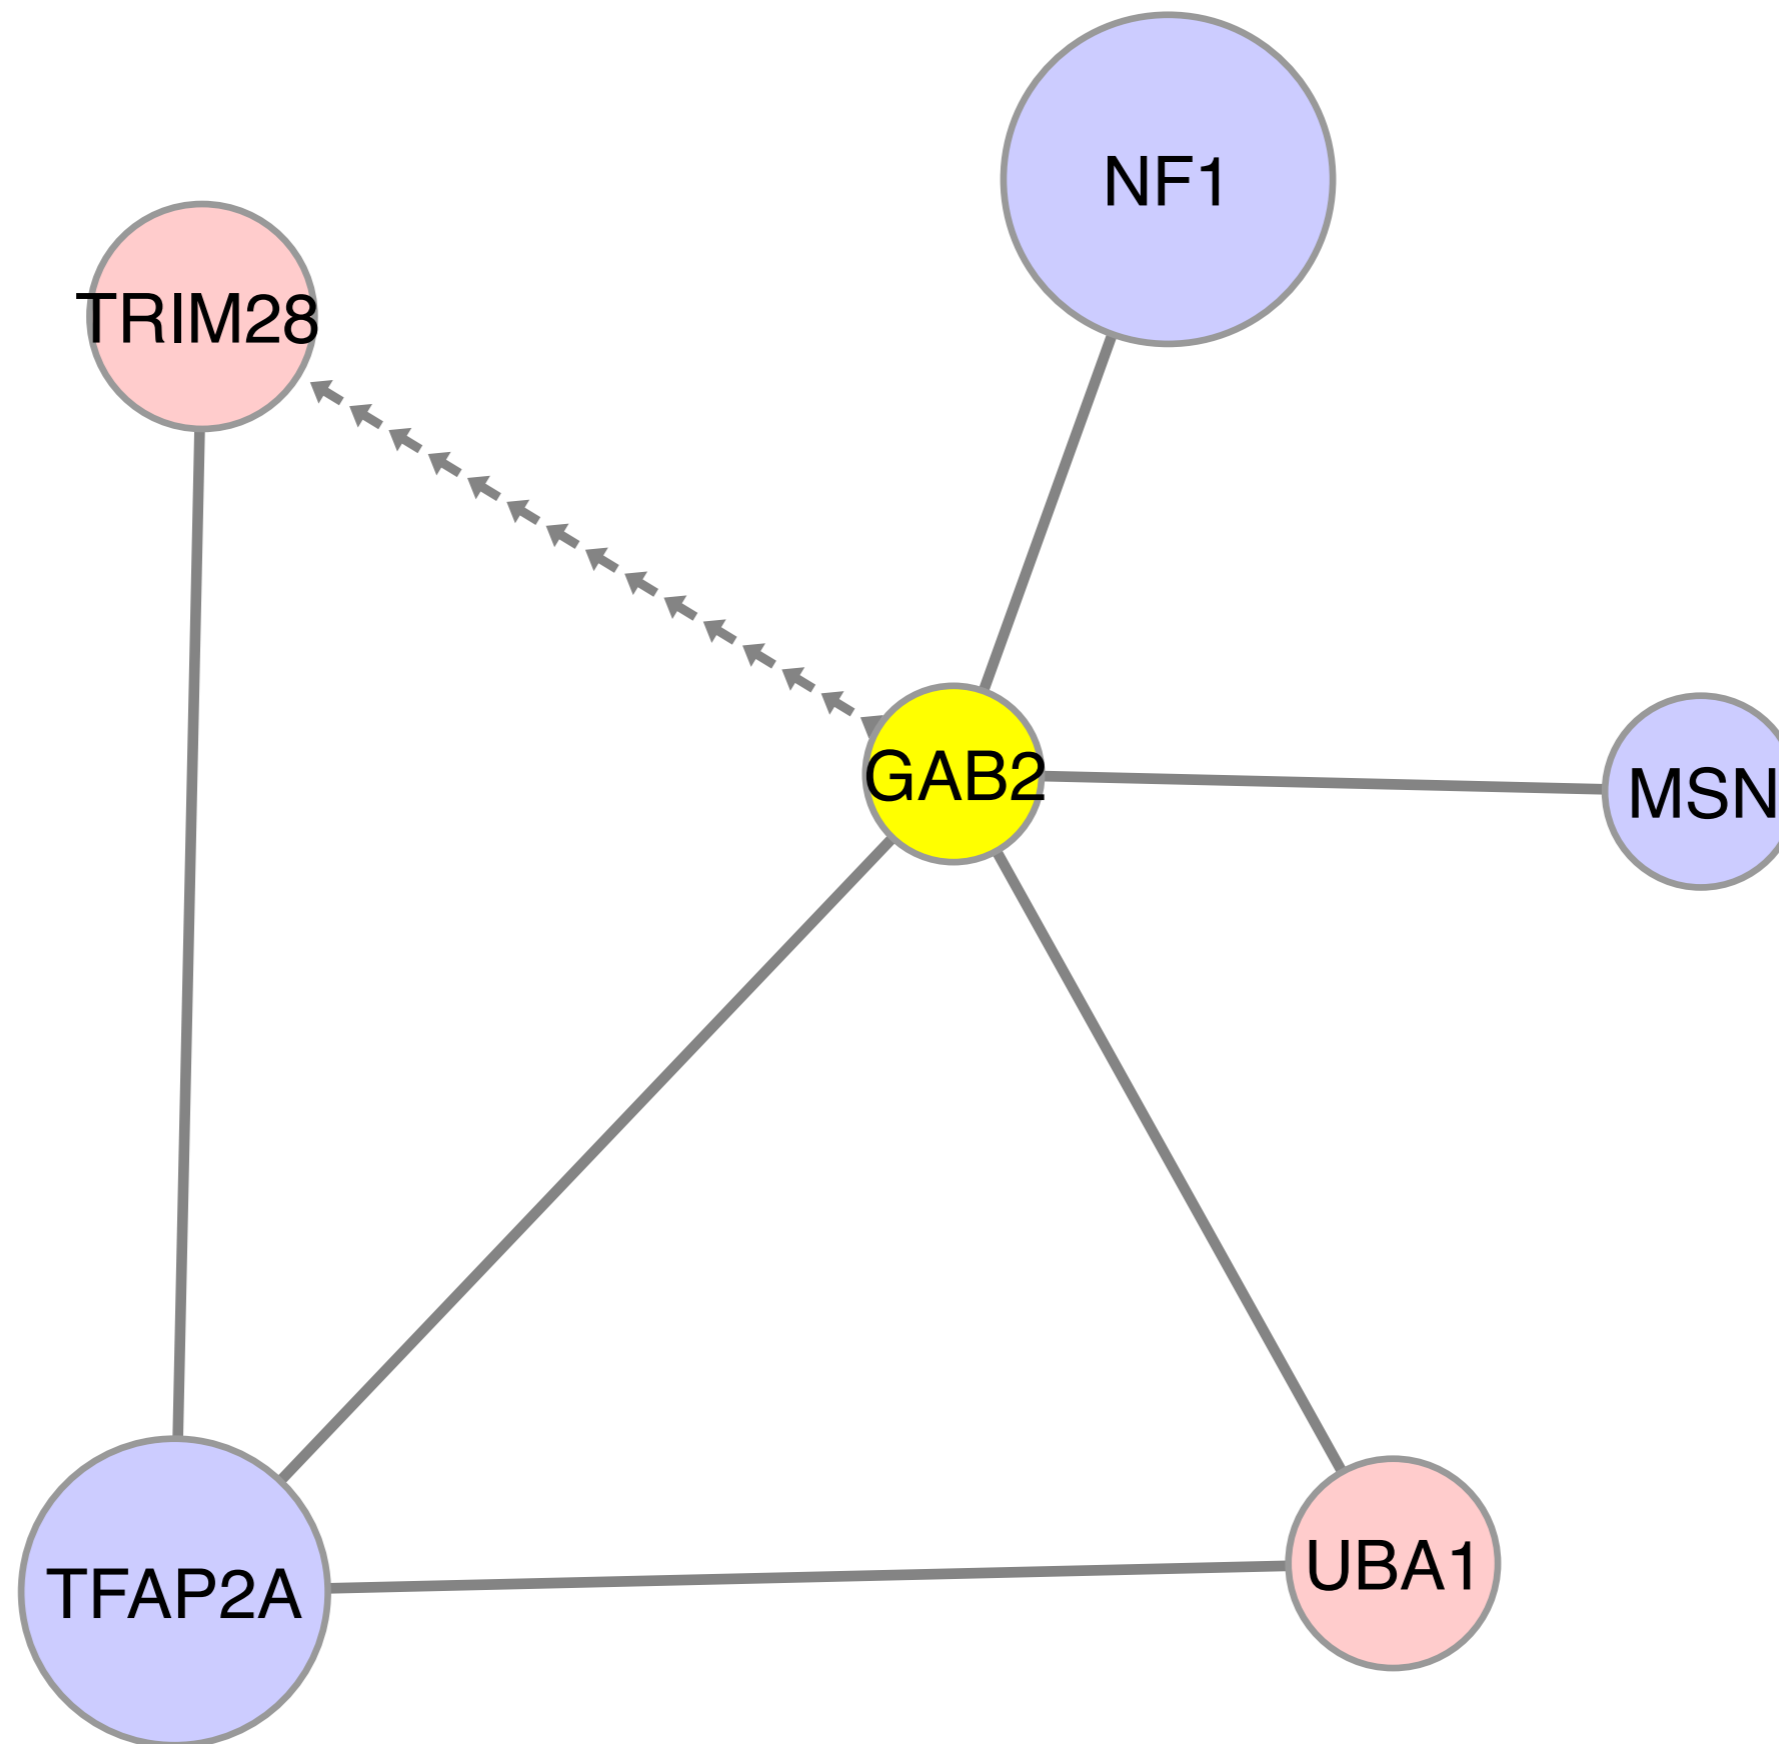

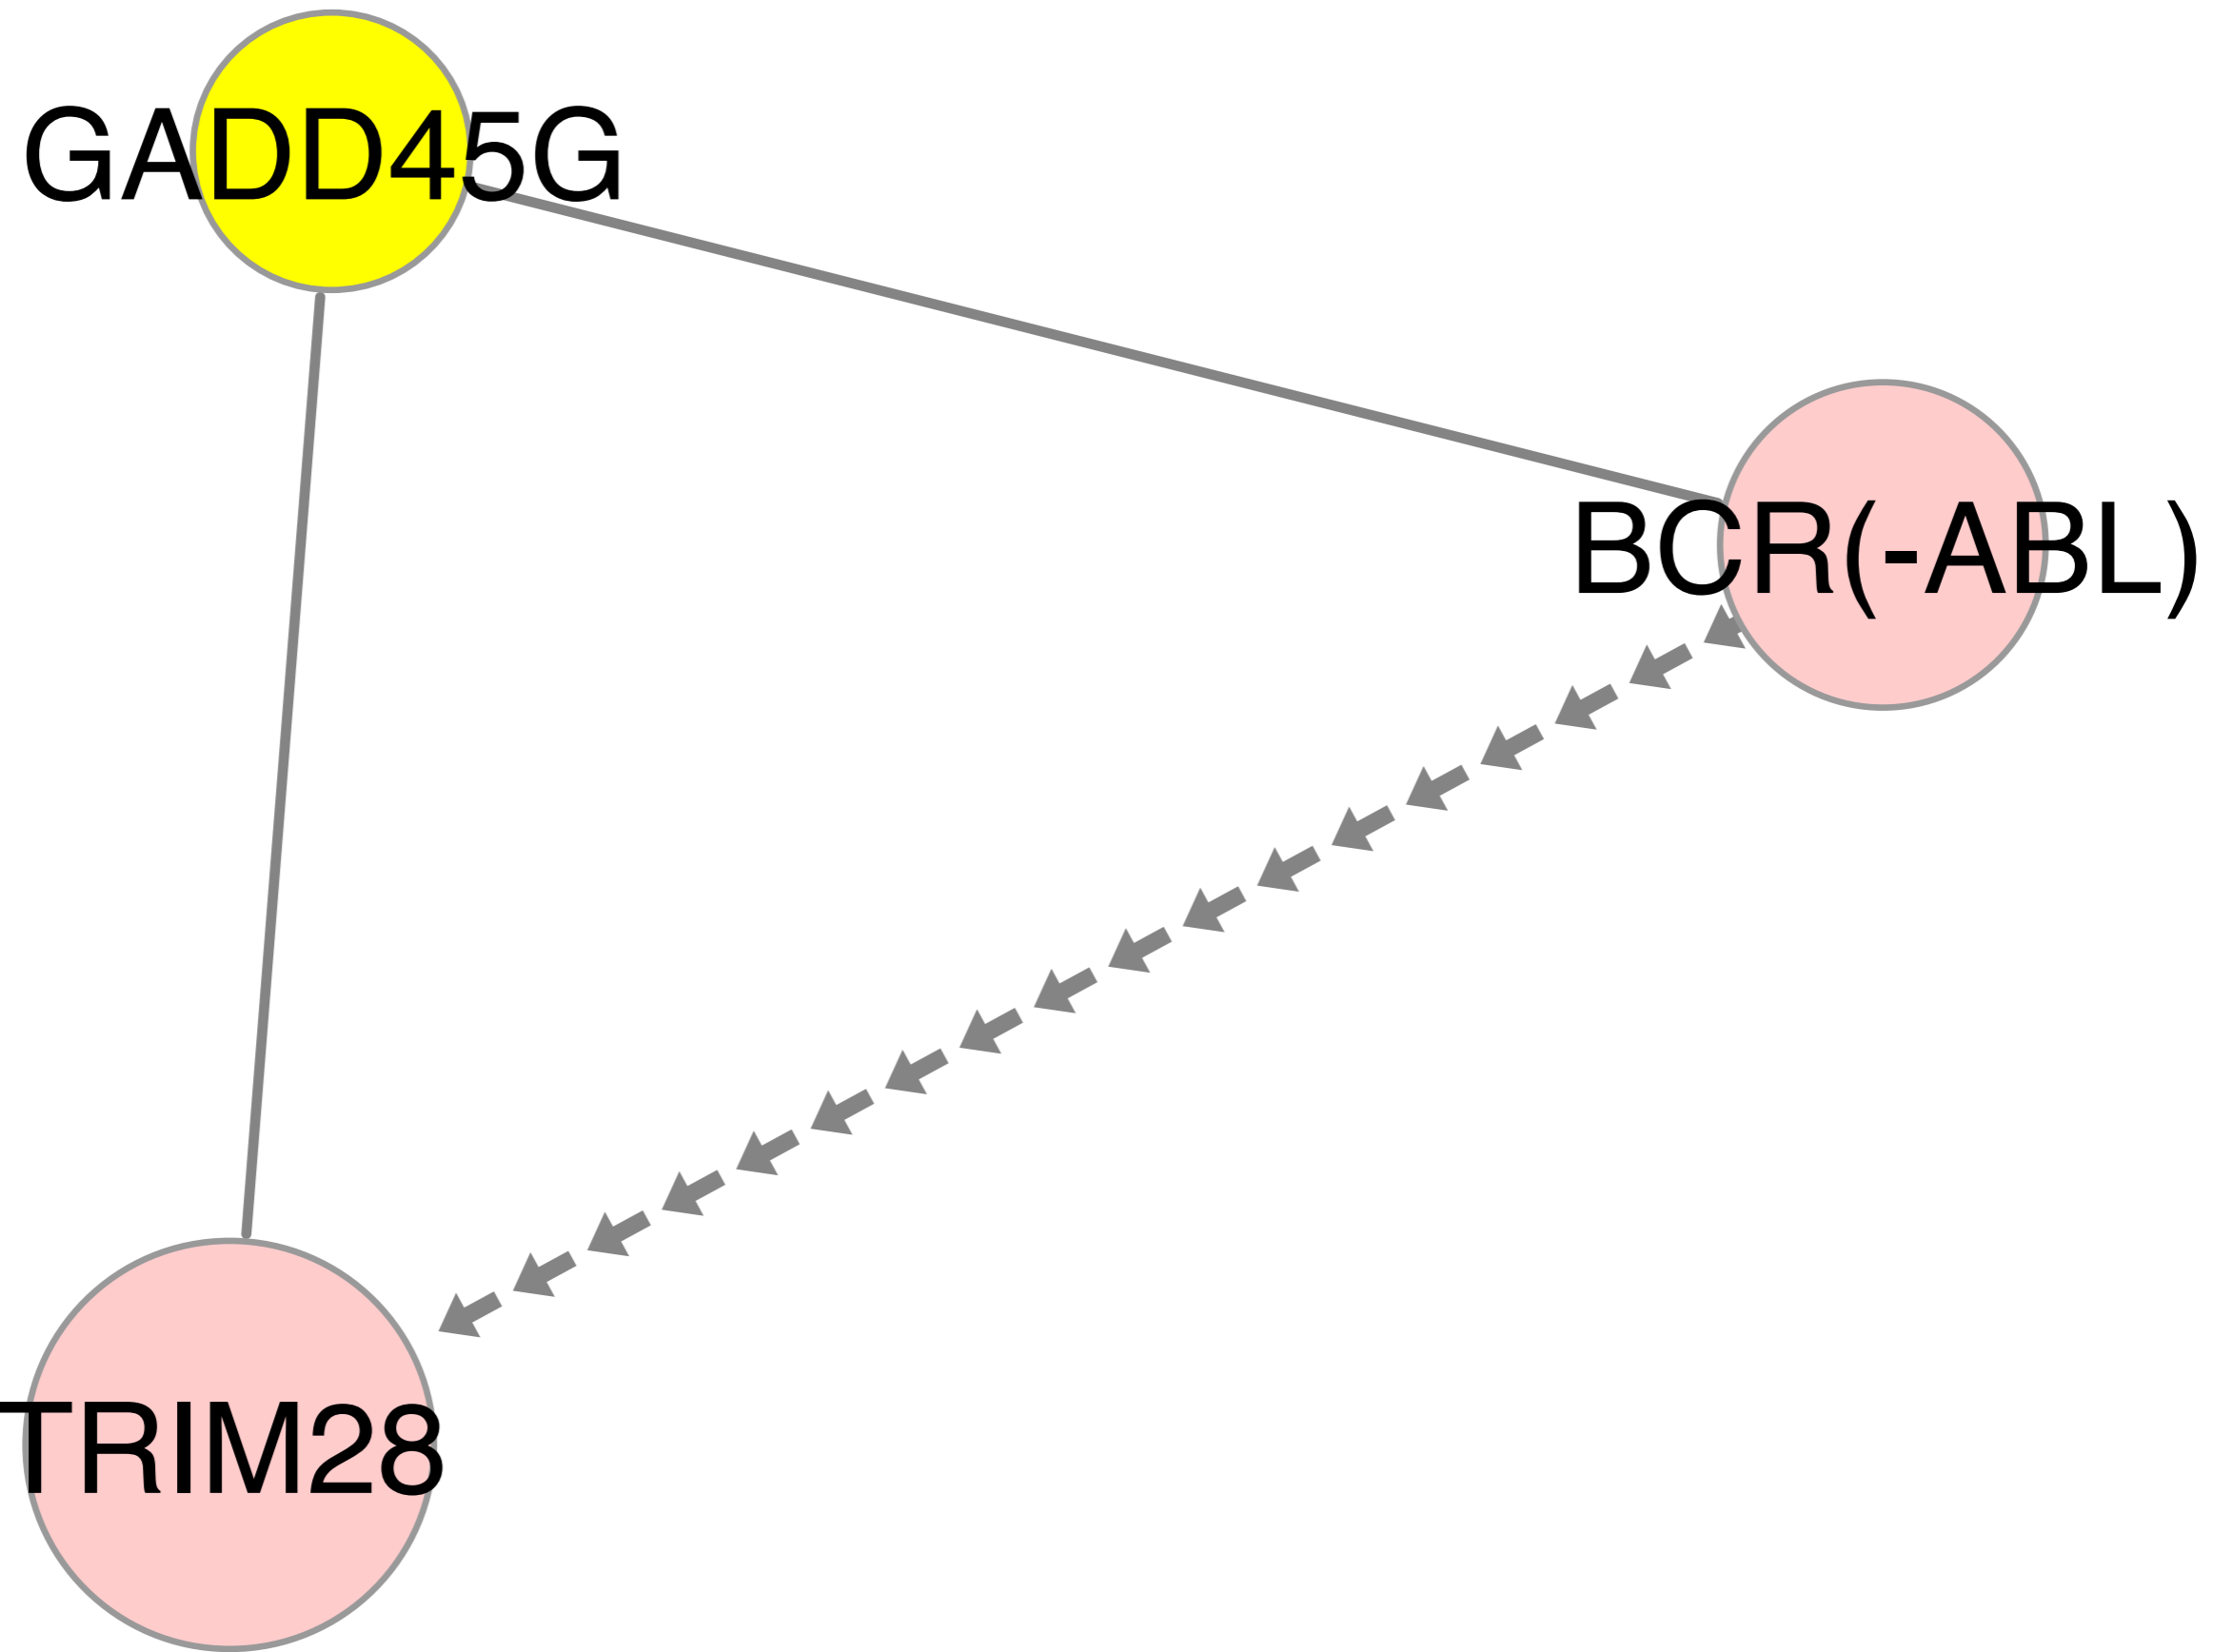

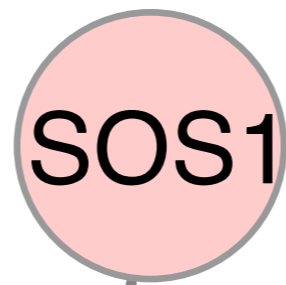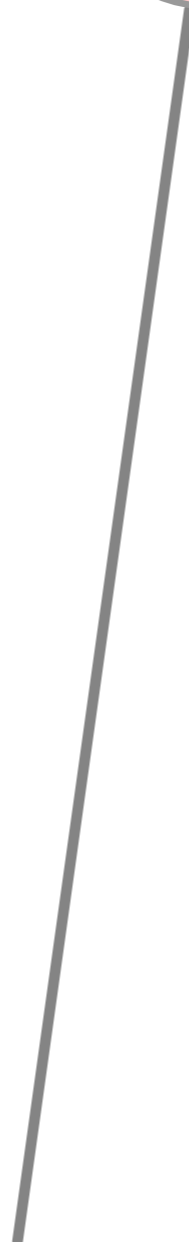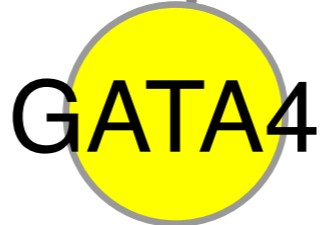

SEPT9

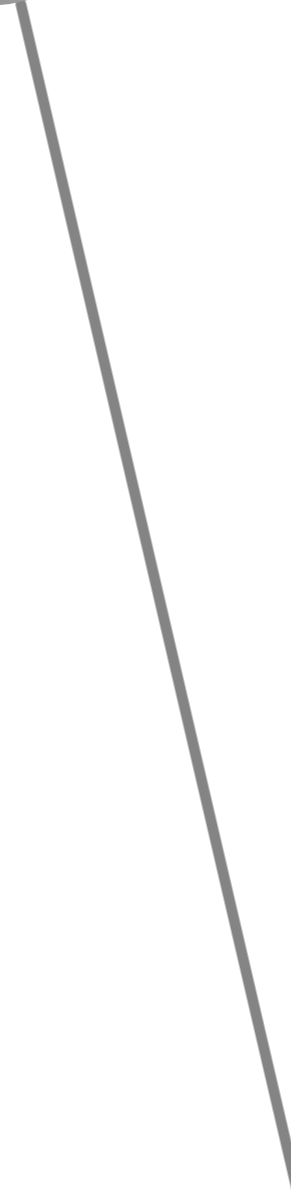

GNAI2

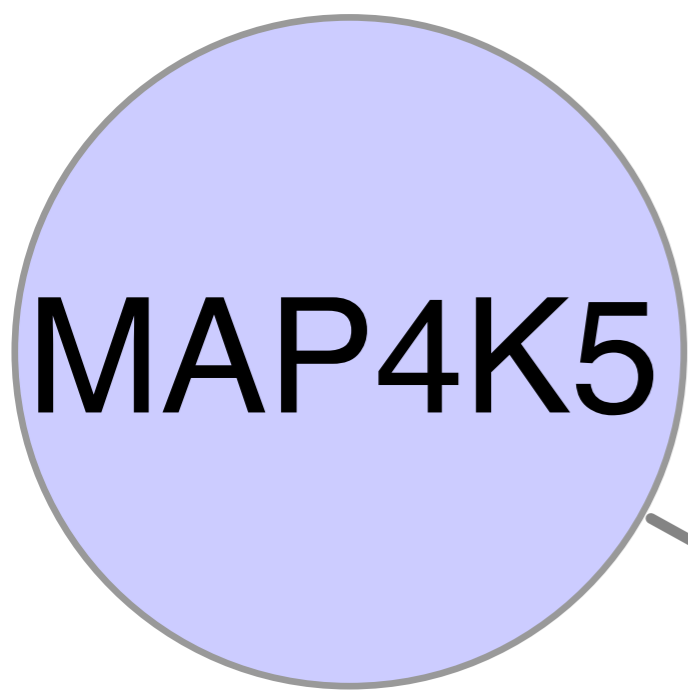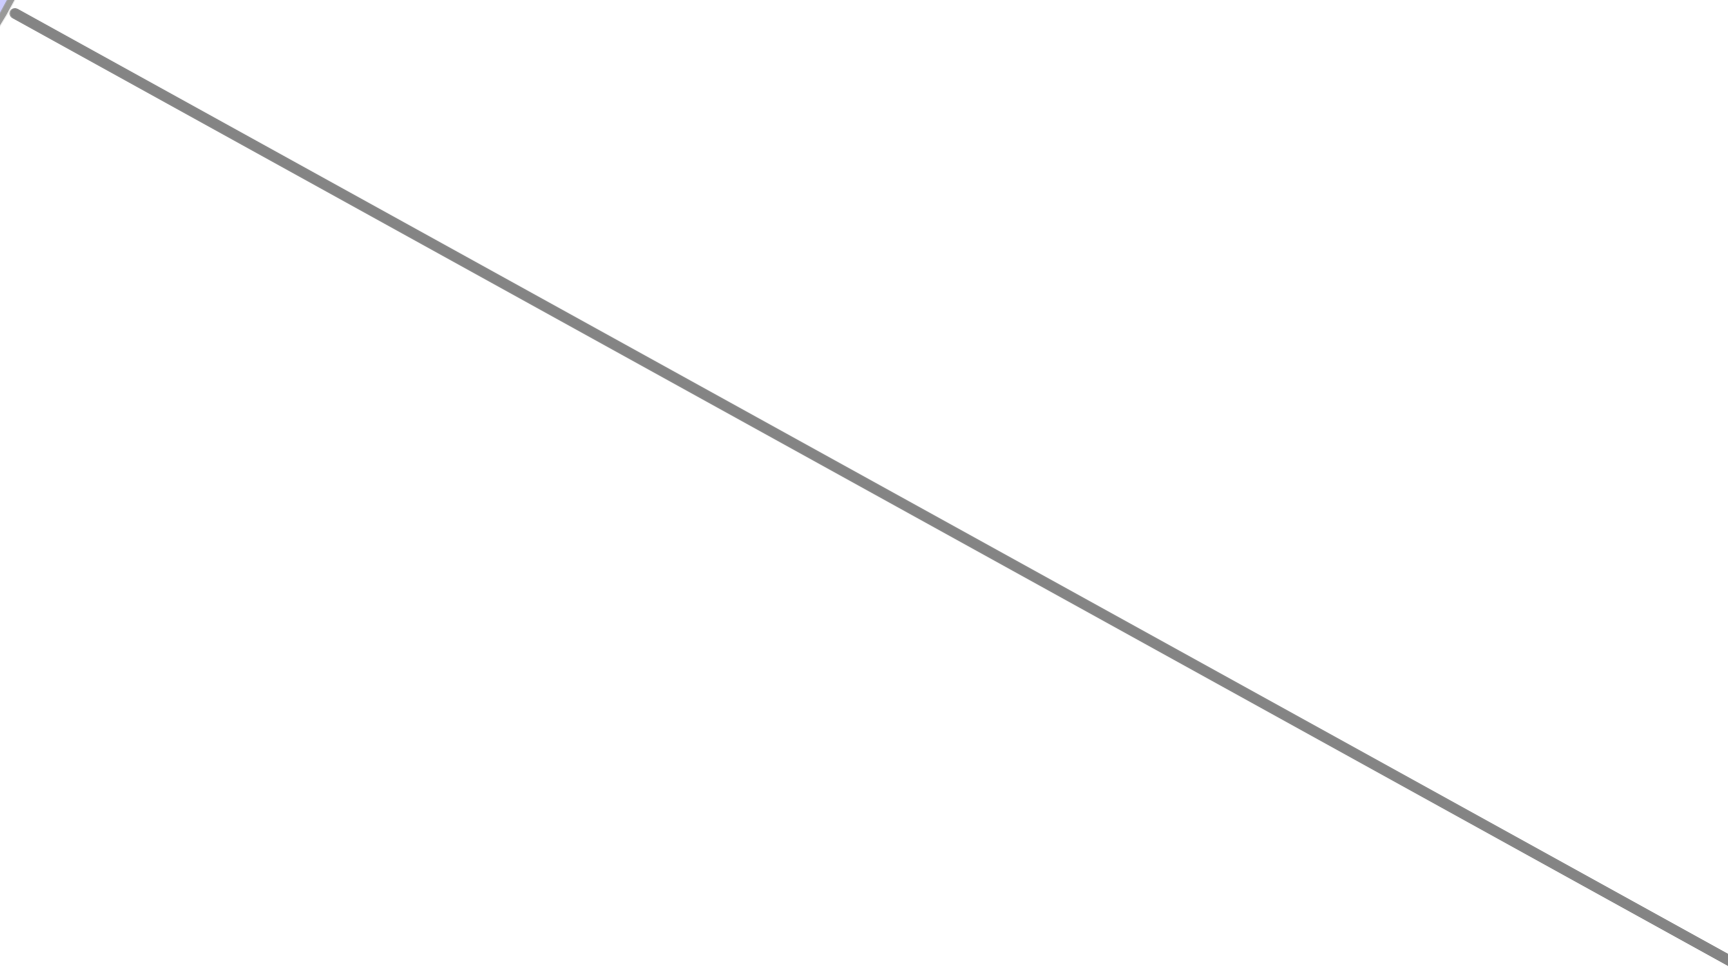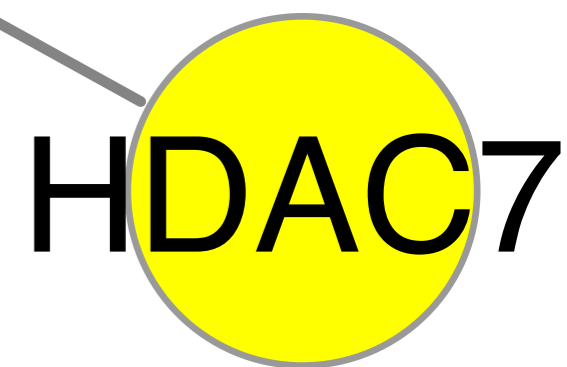



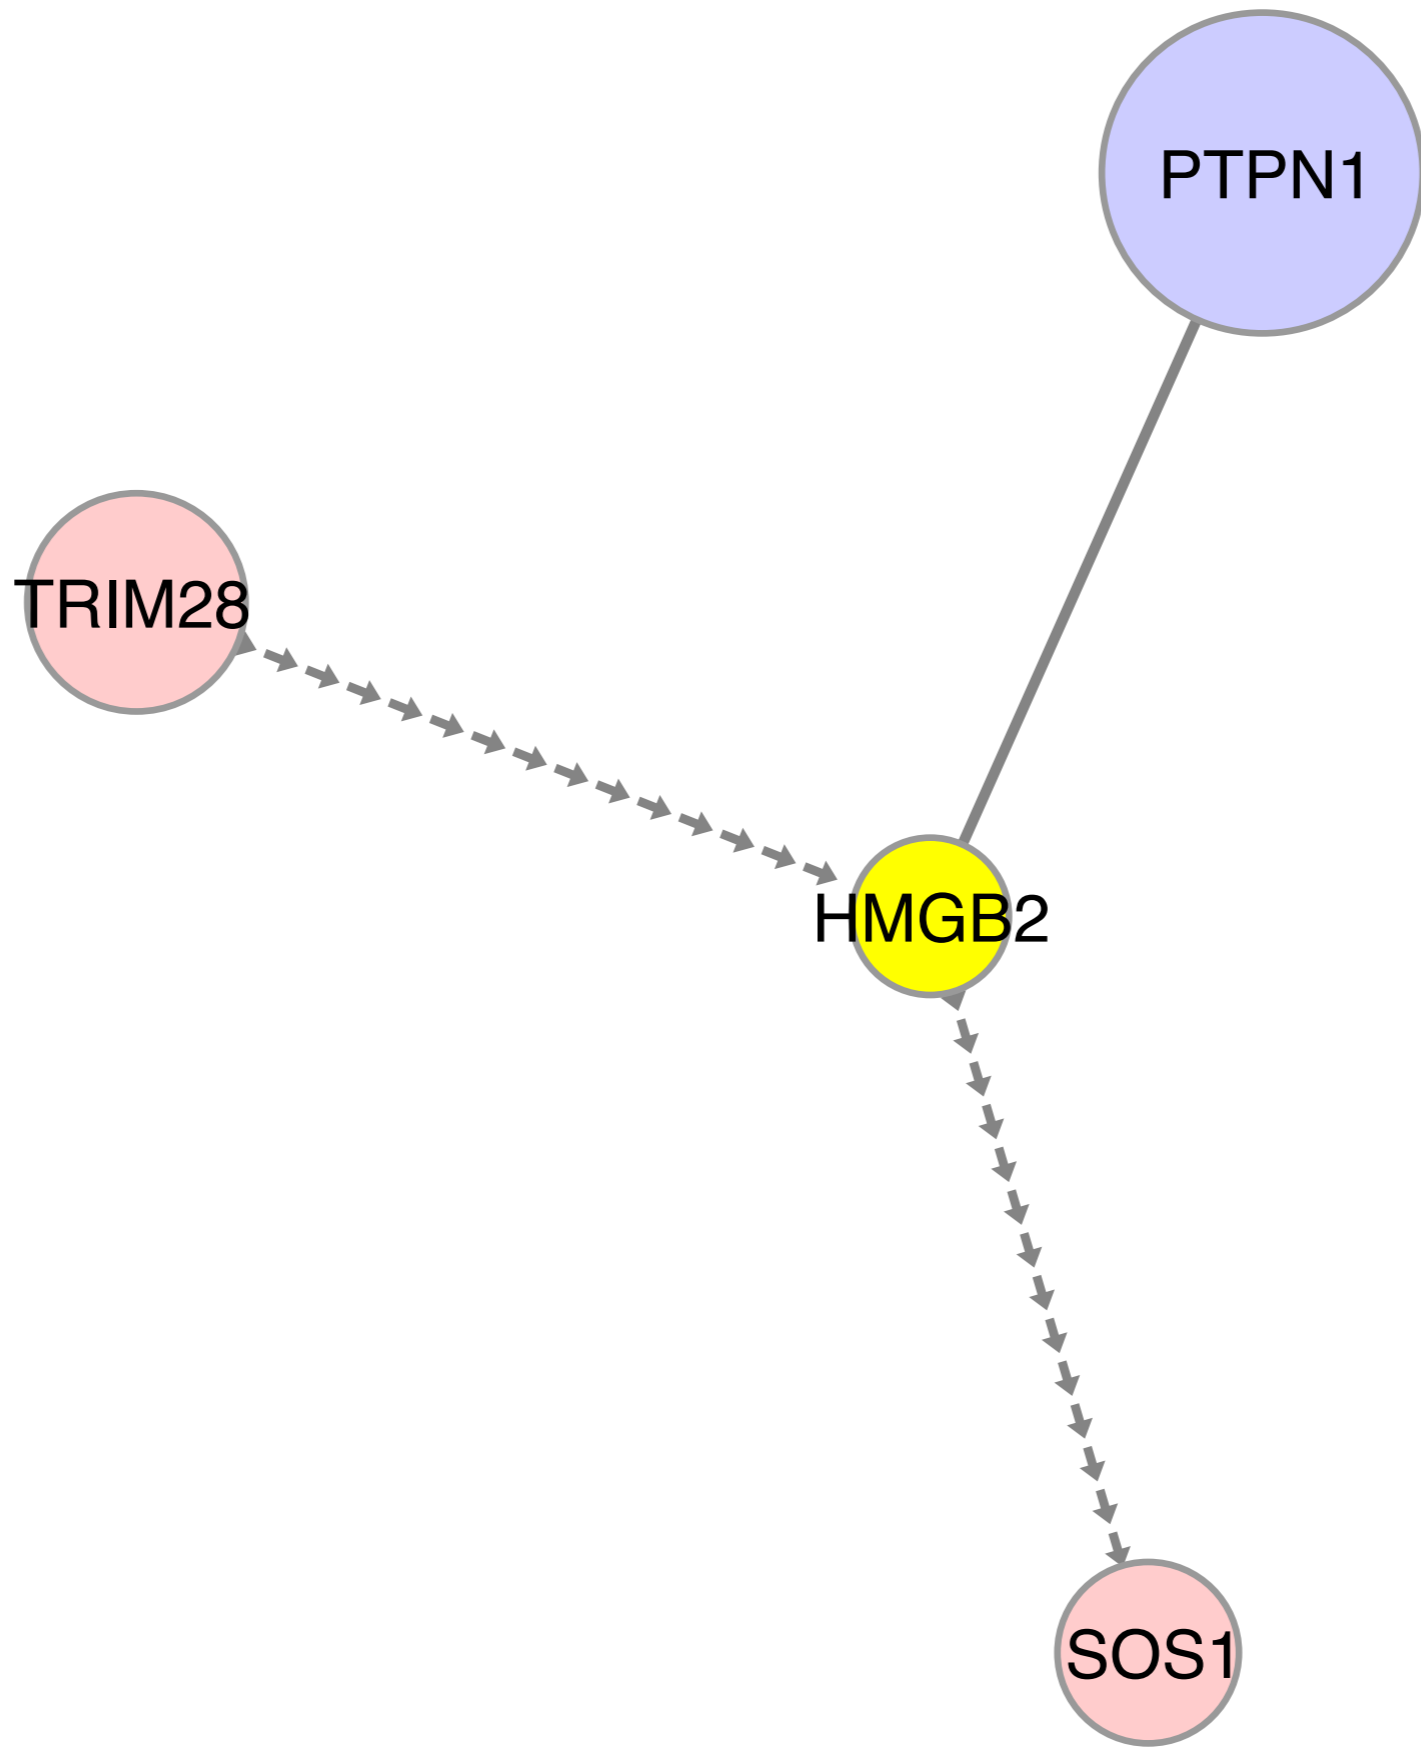

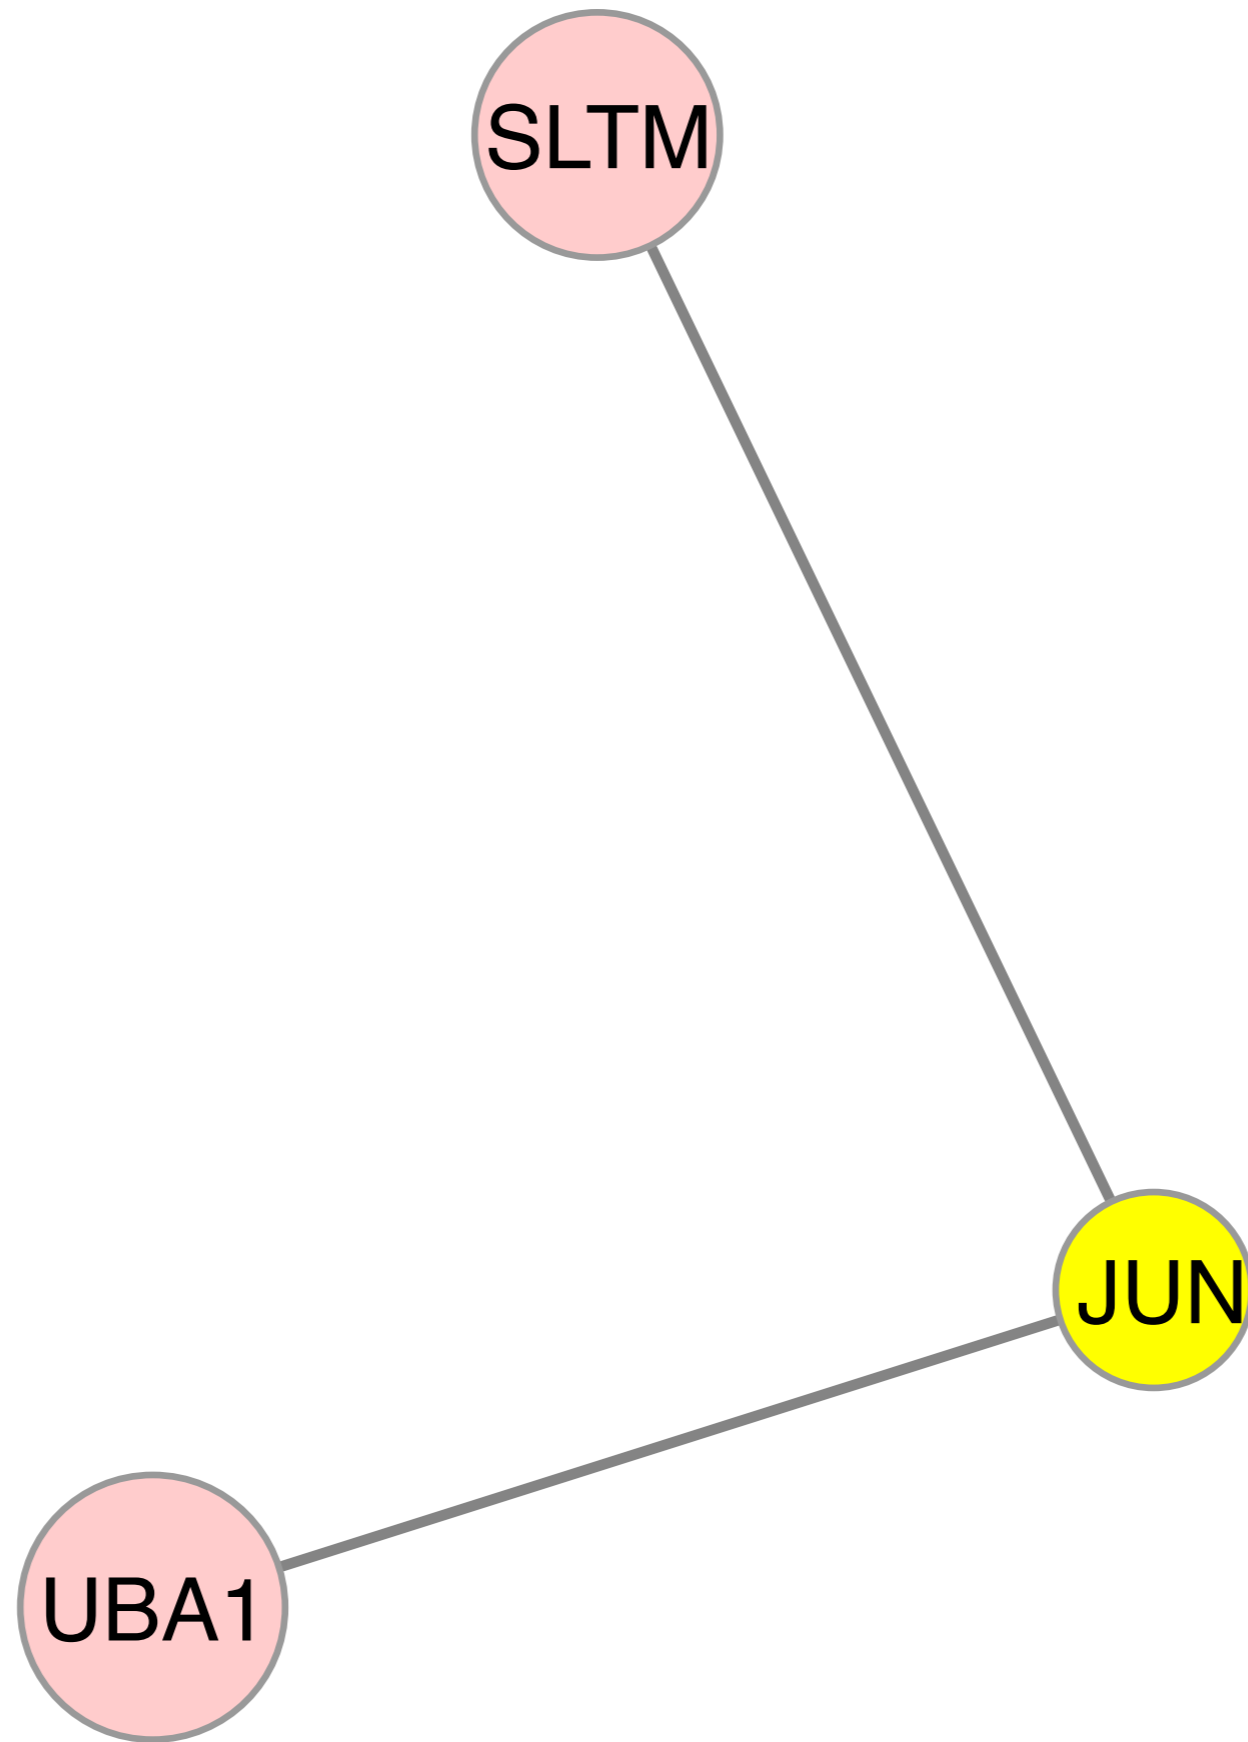

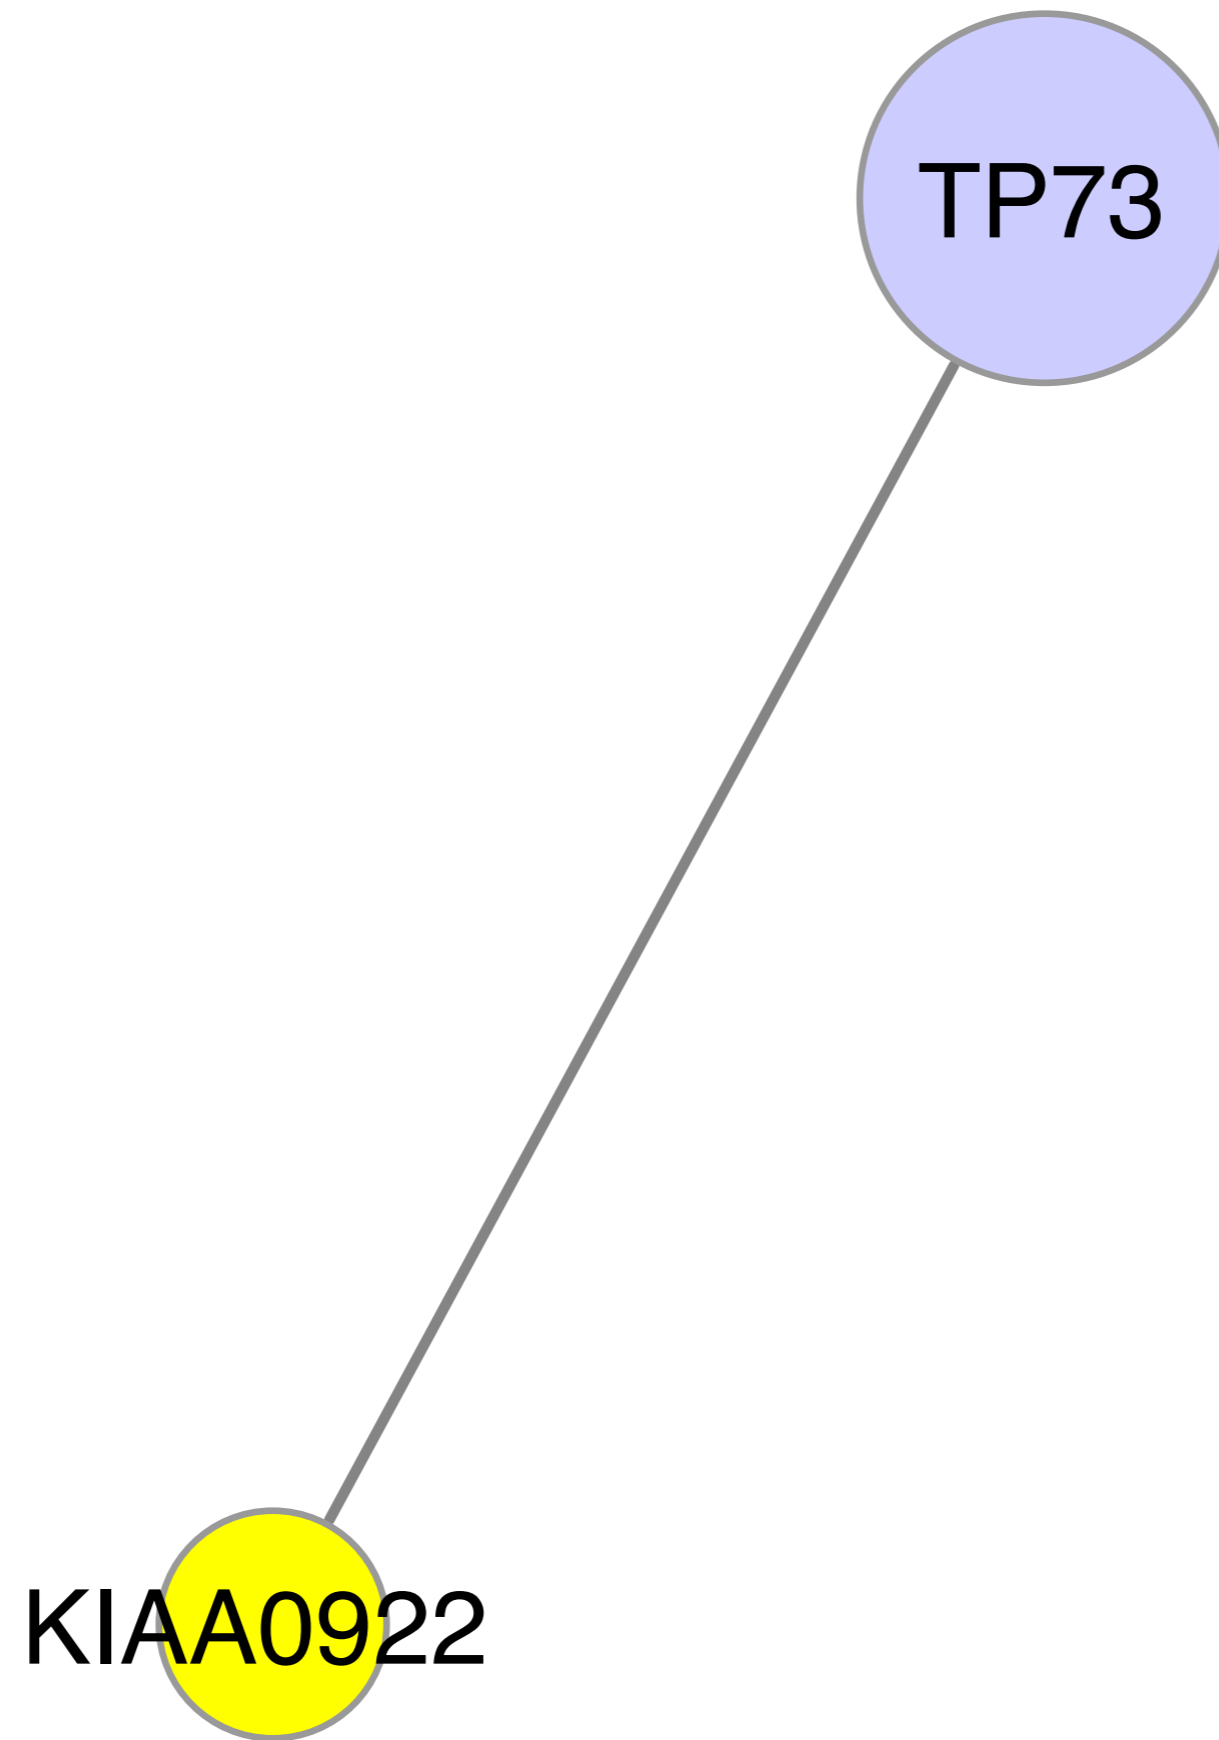

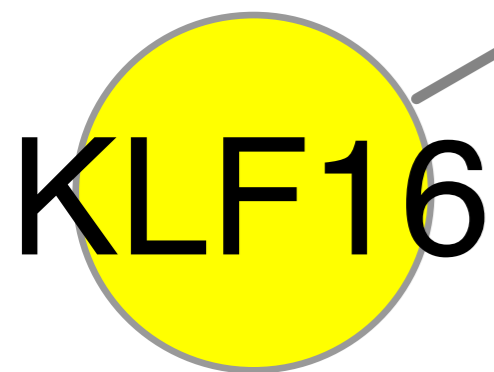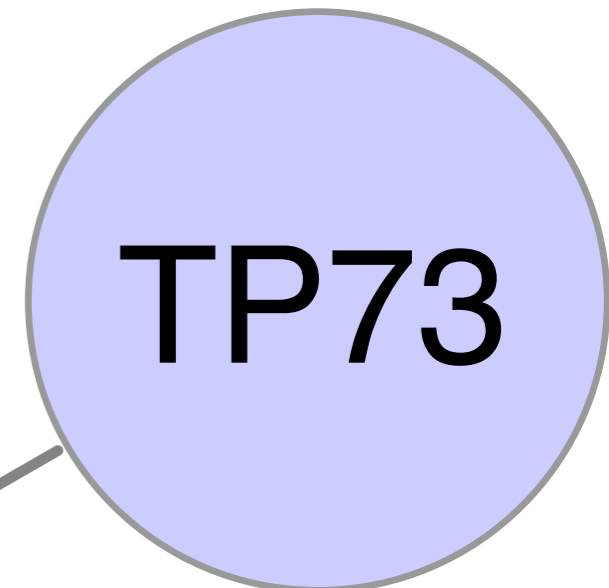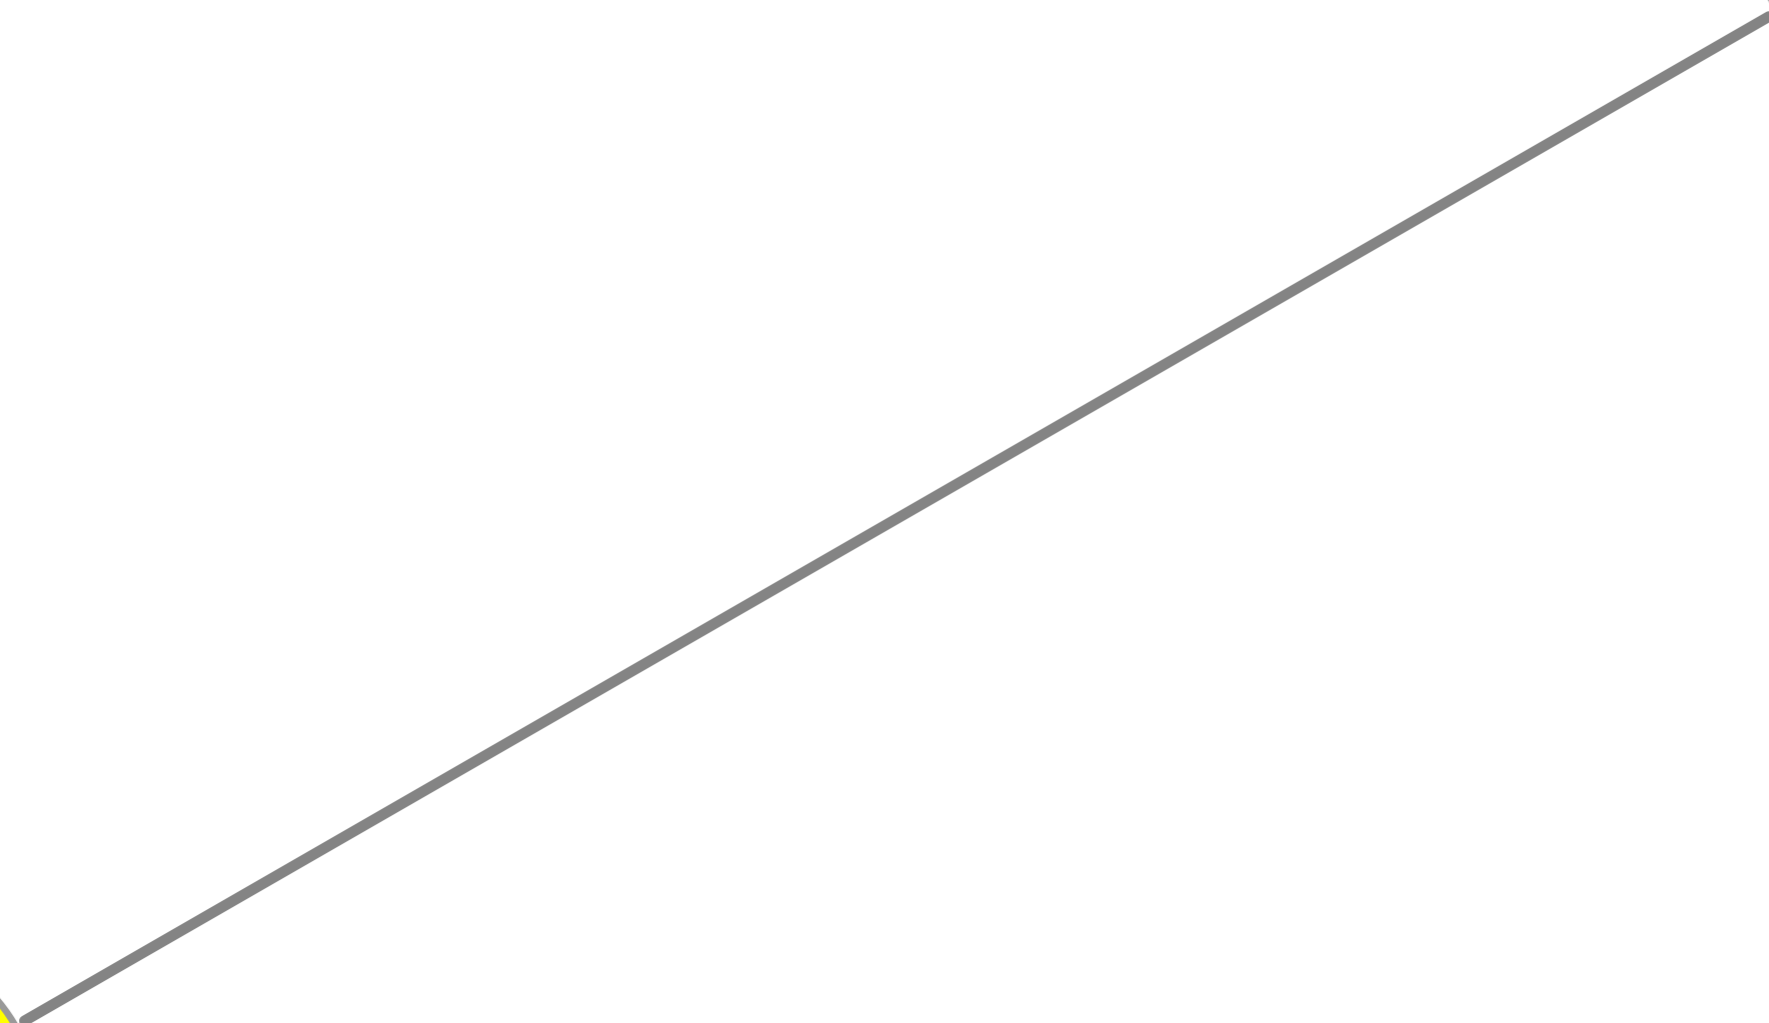

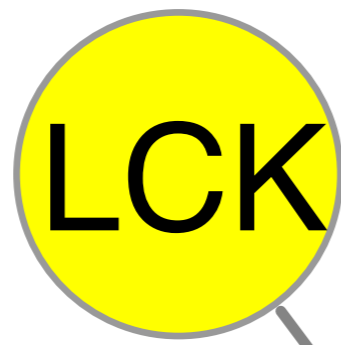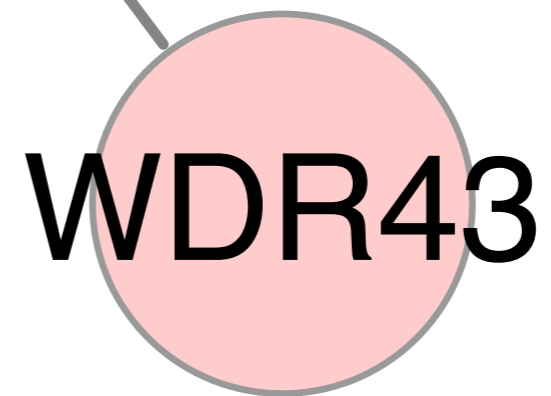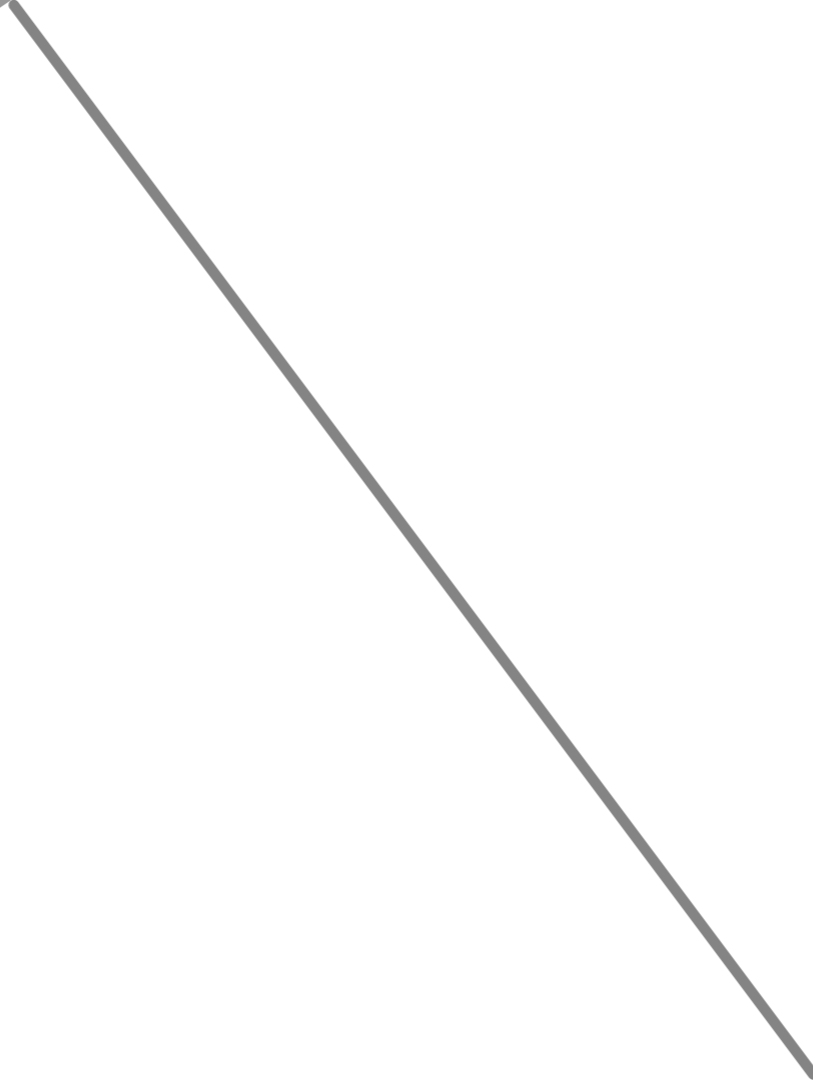

**MAP2K6**

**TRIM28**

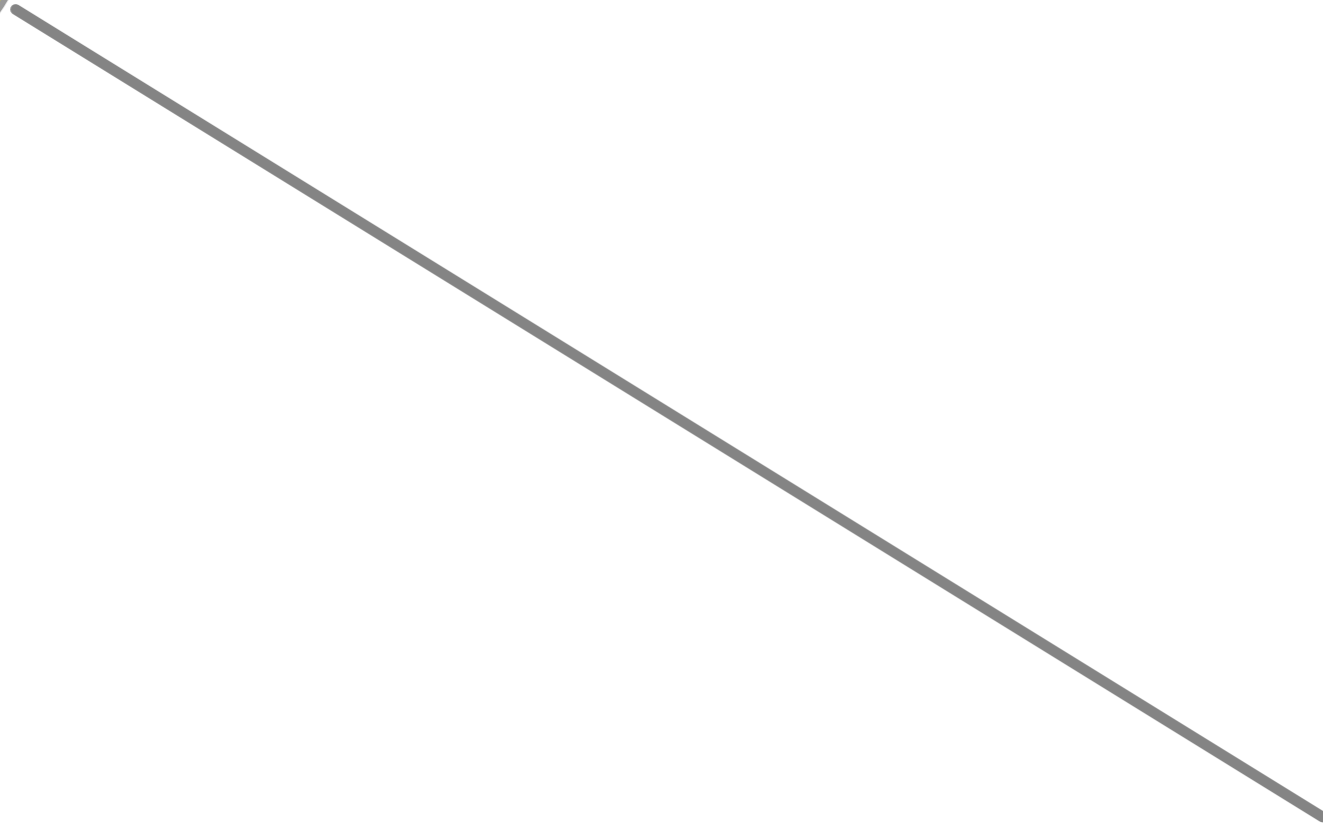

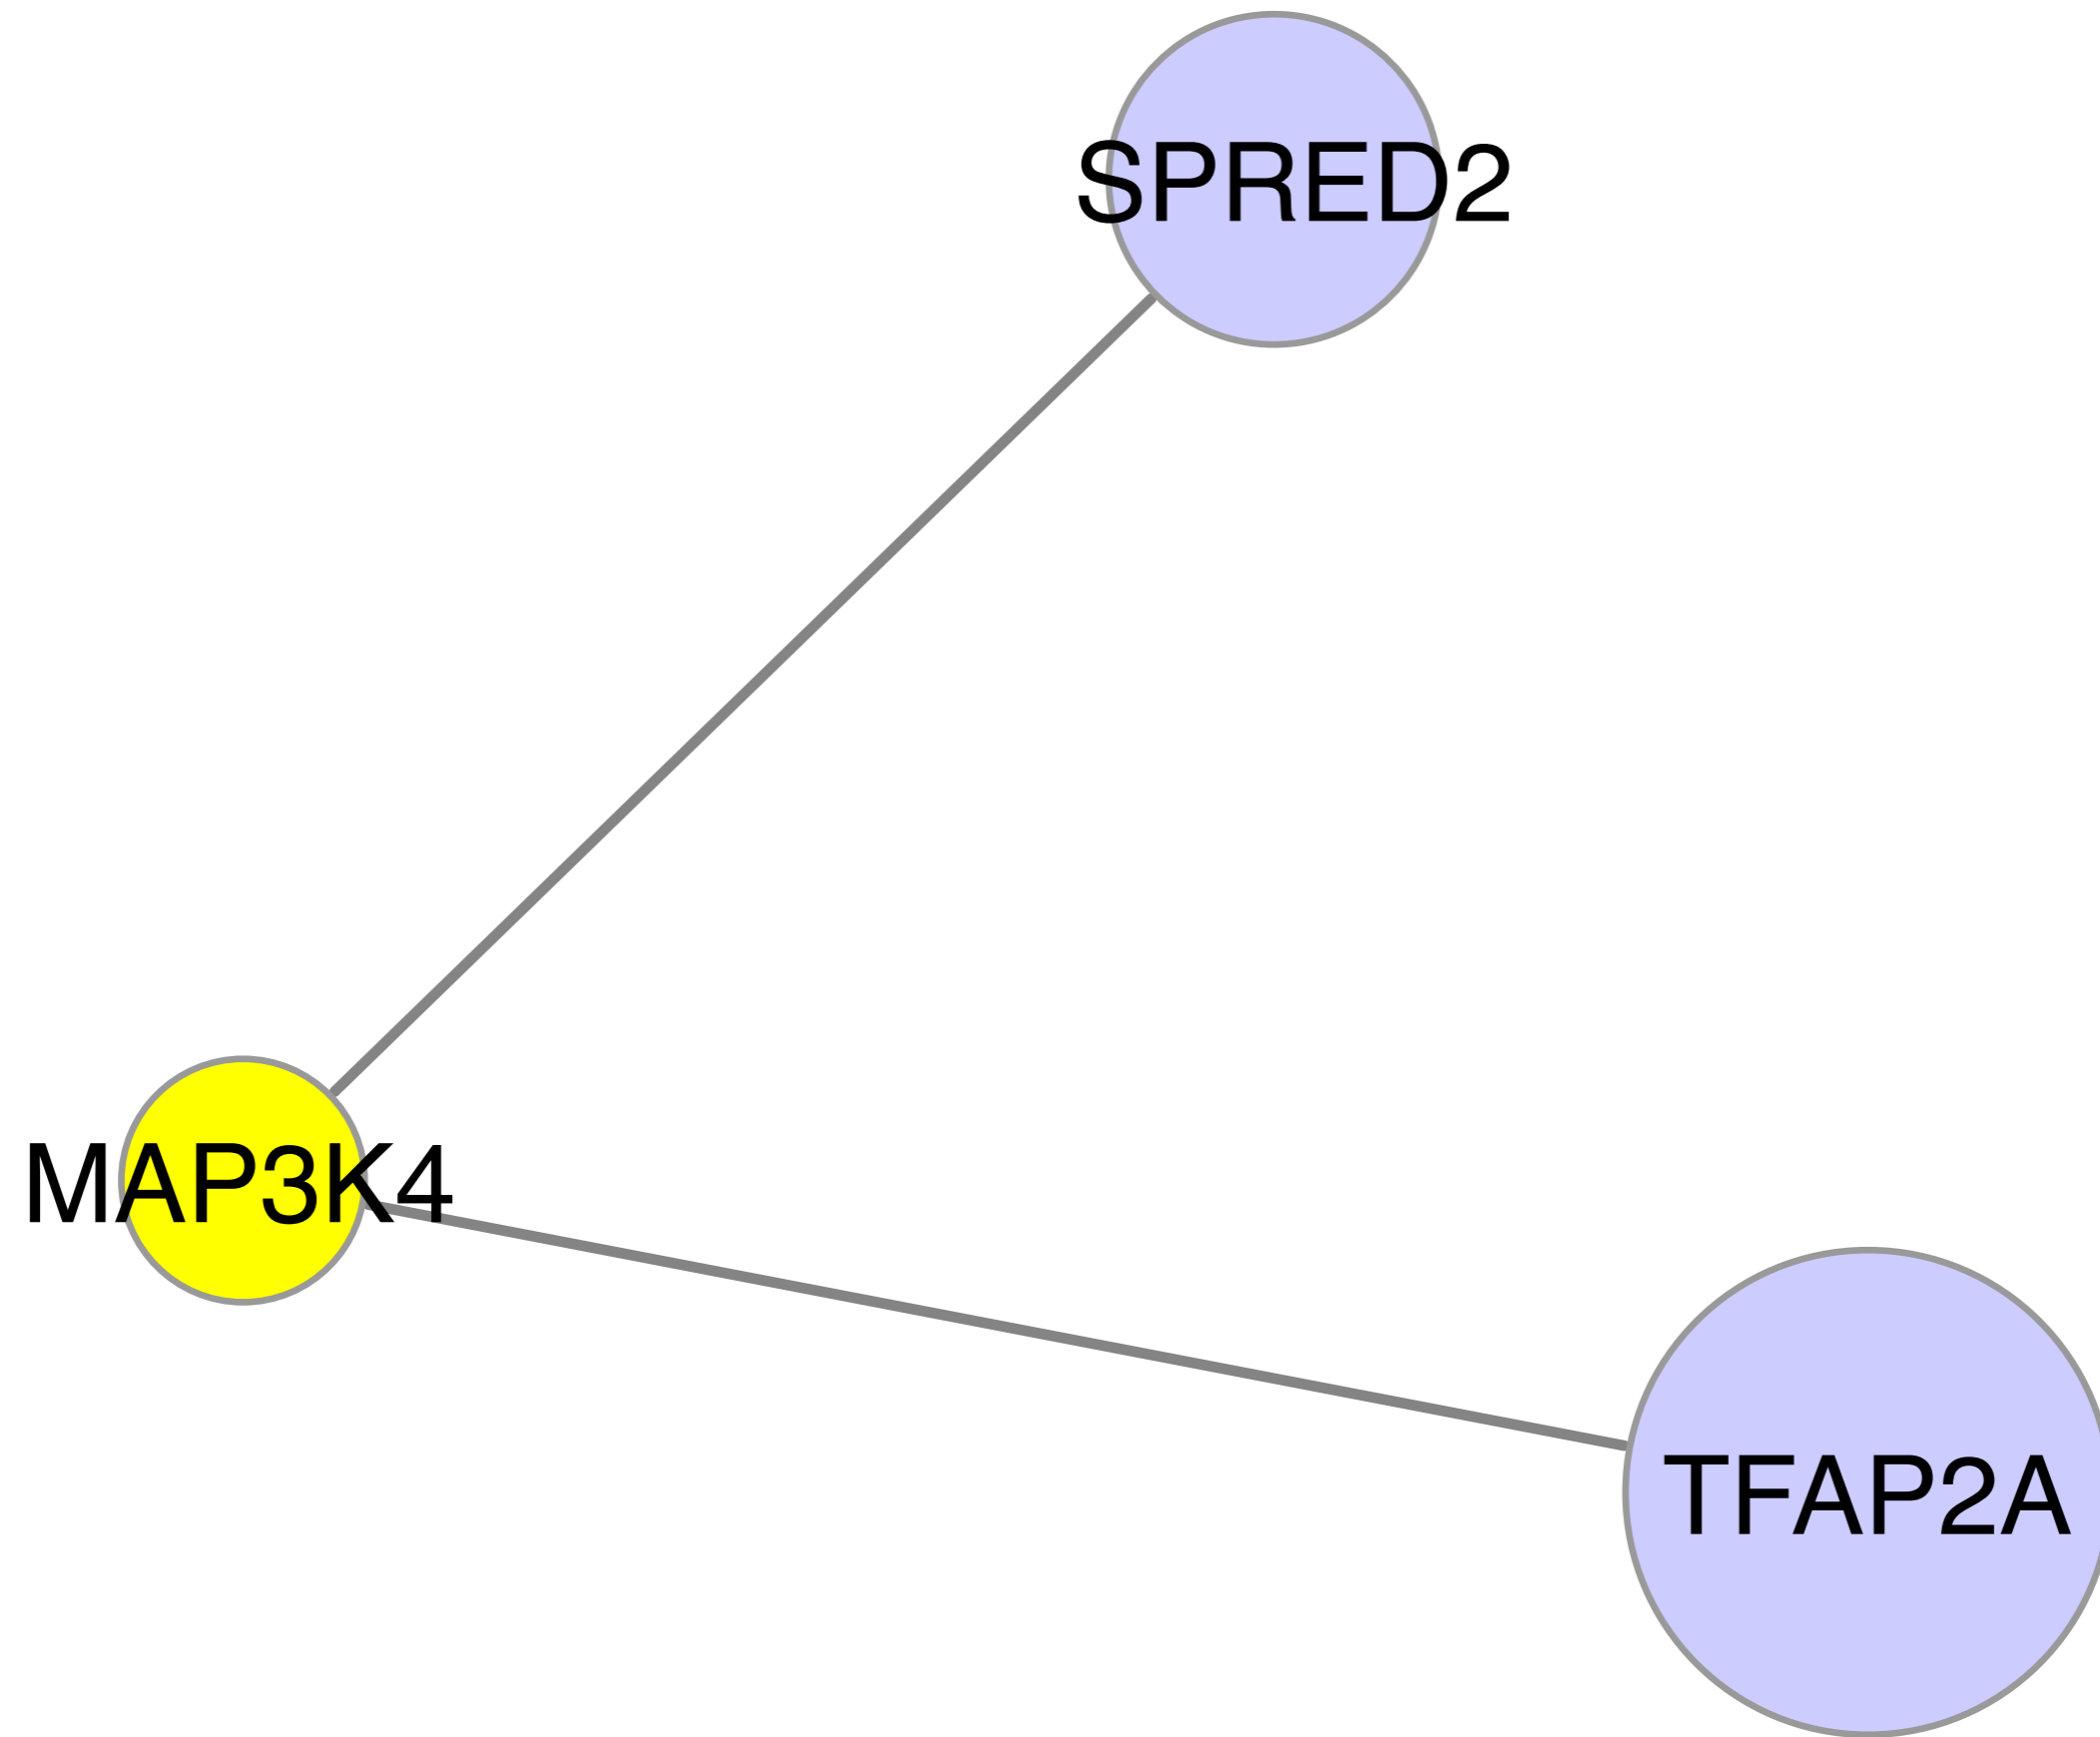

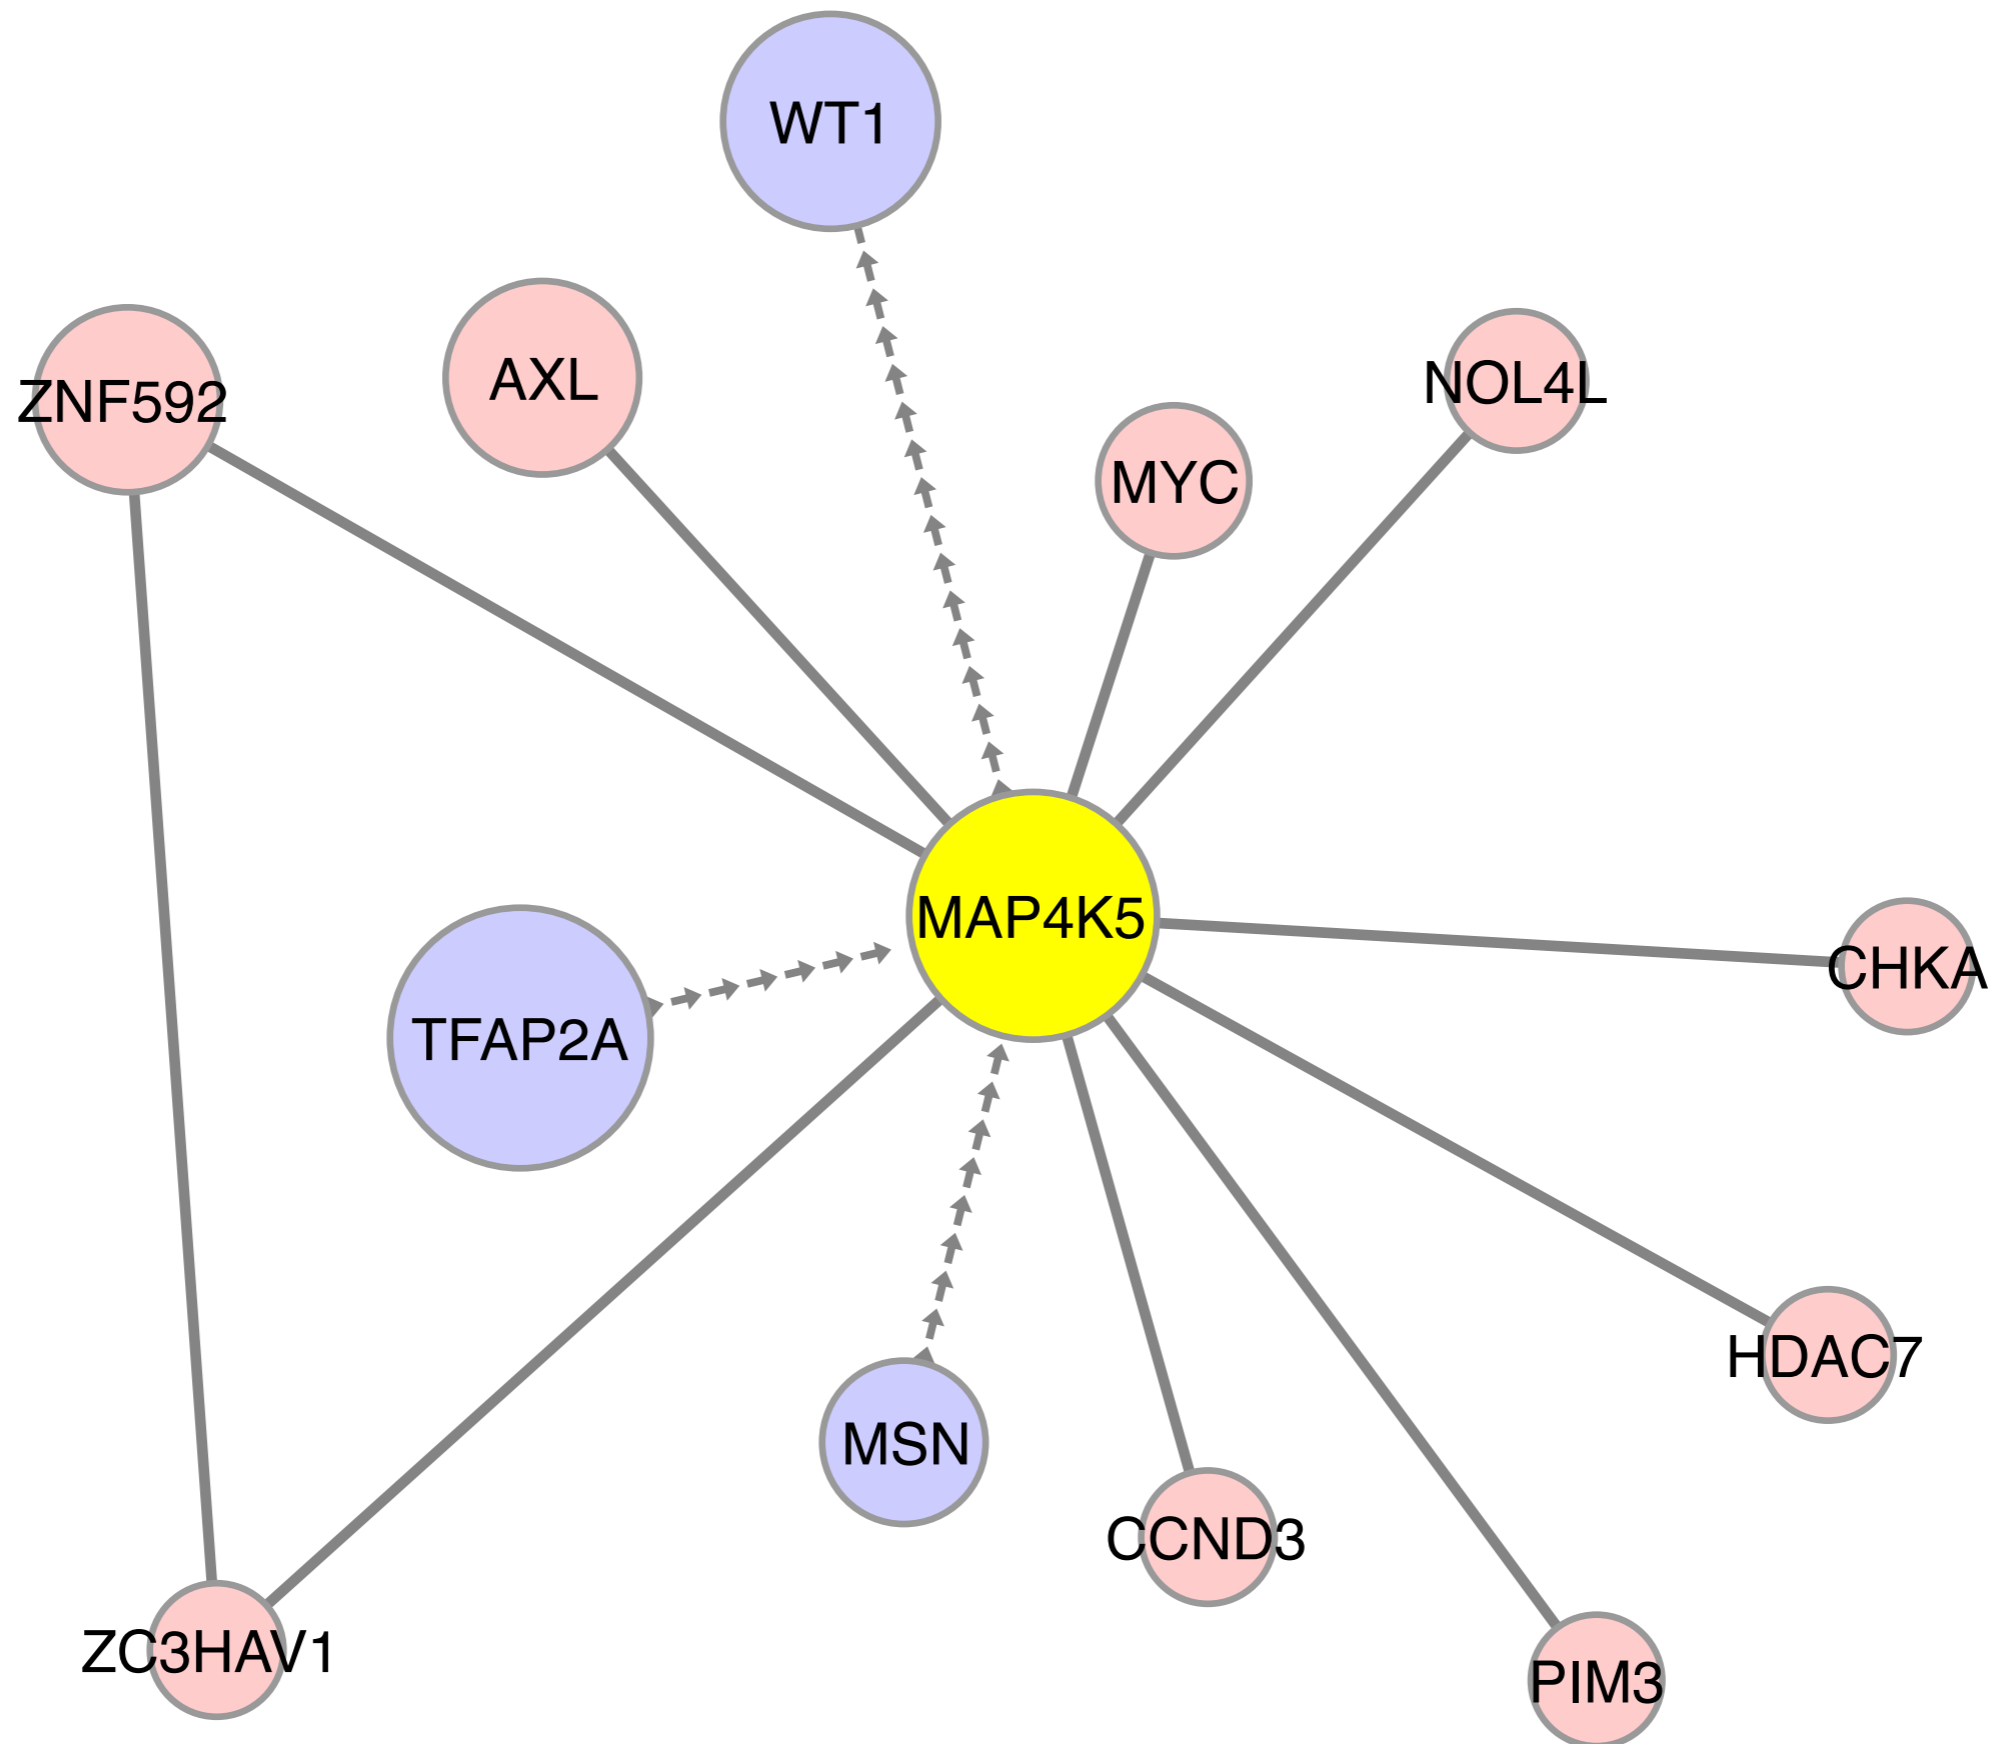



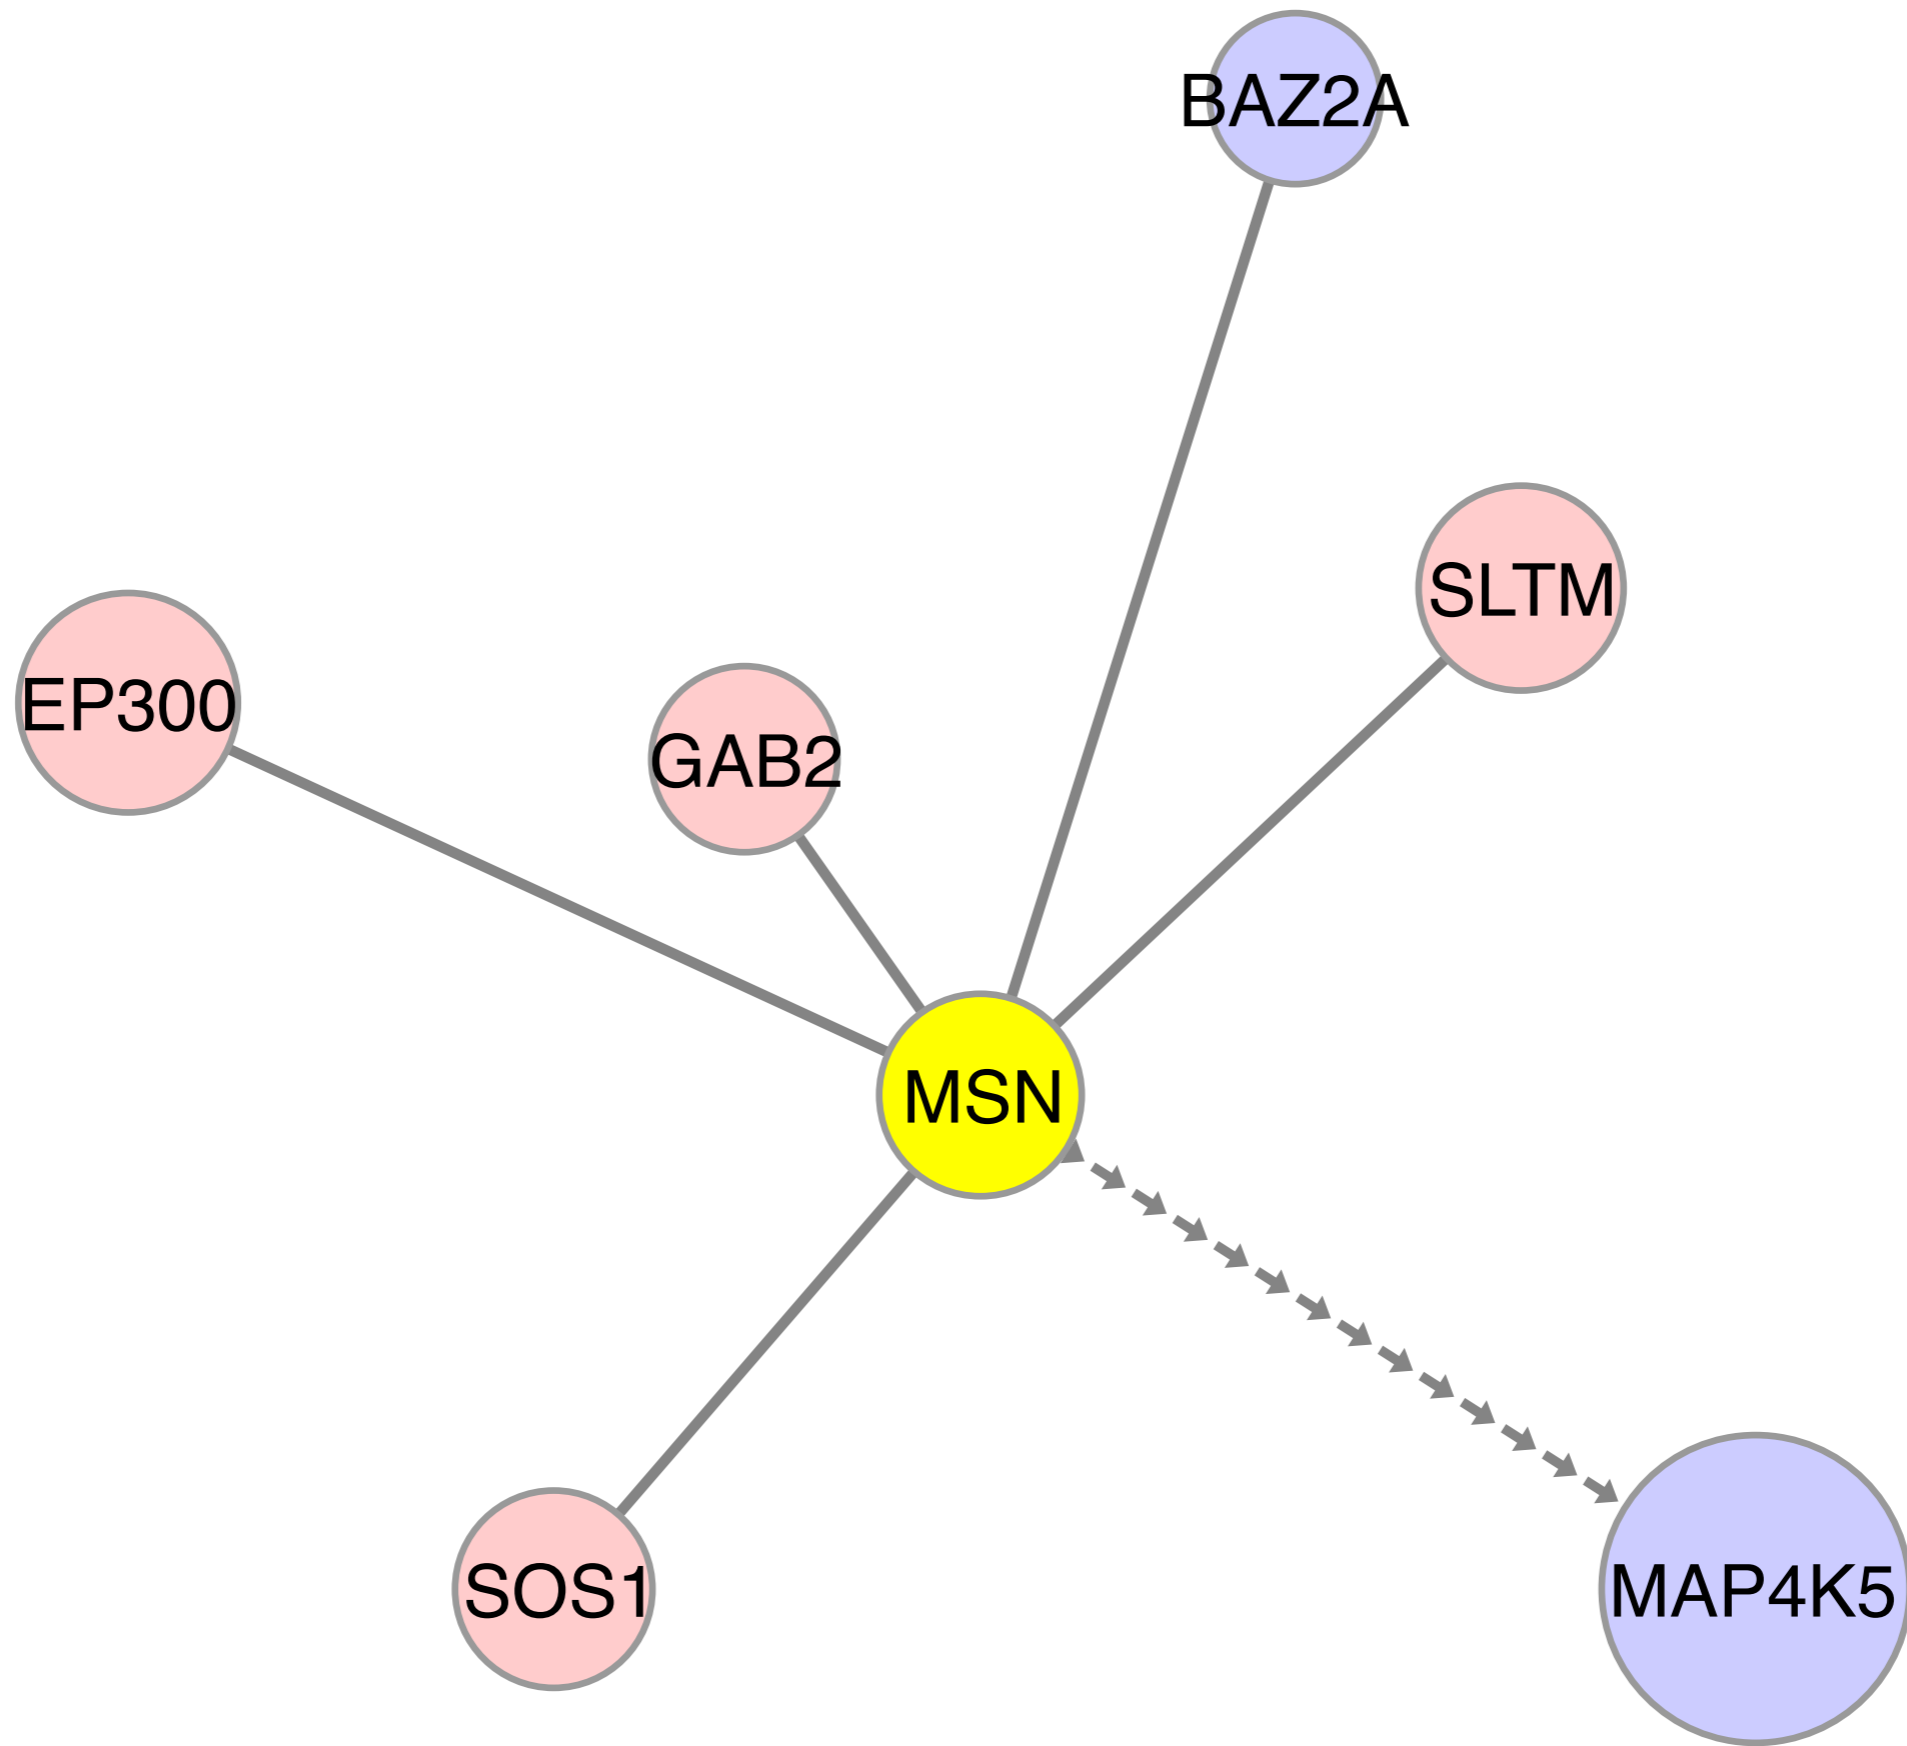

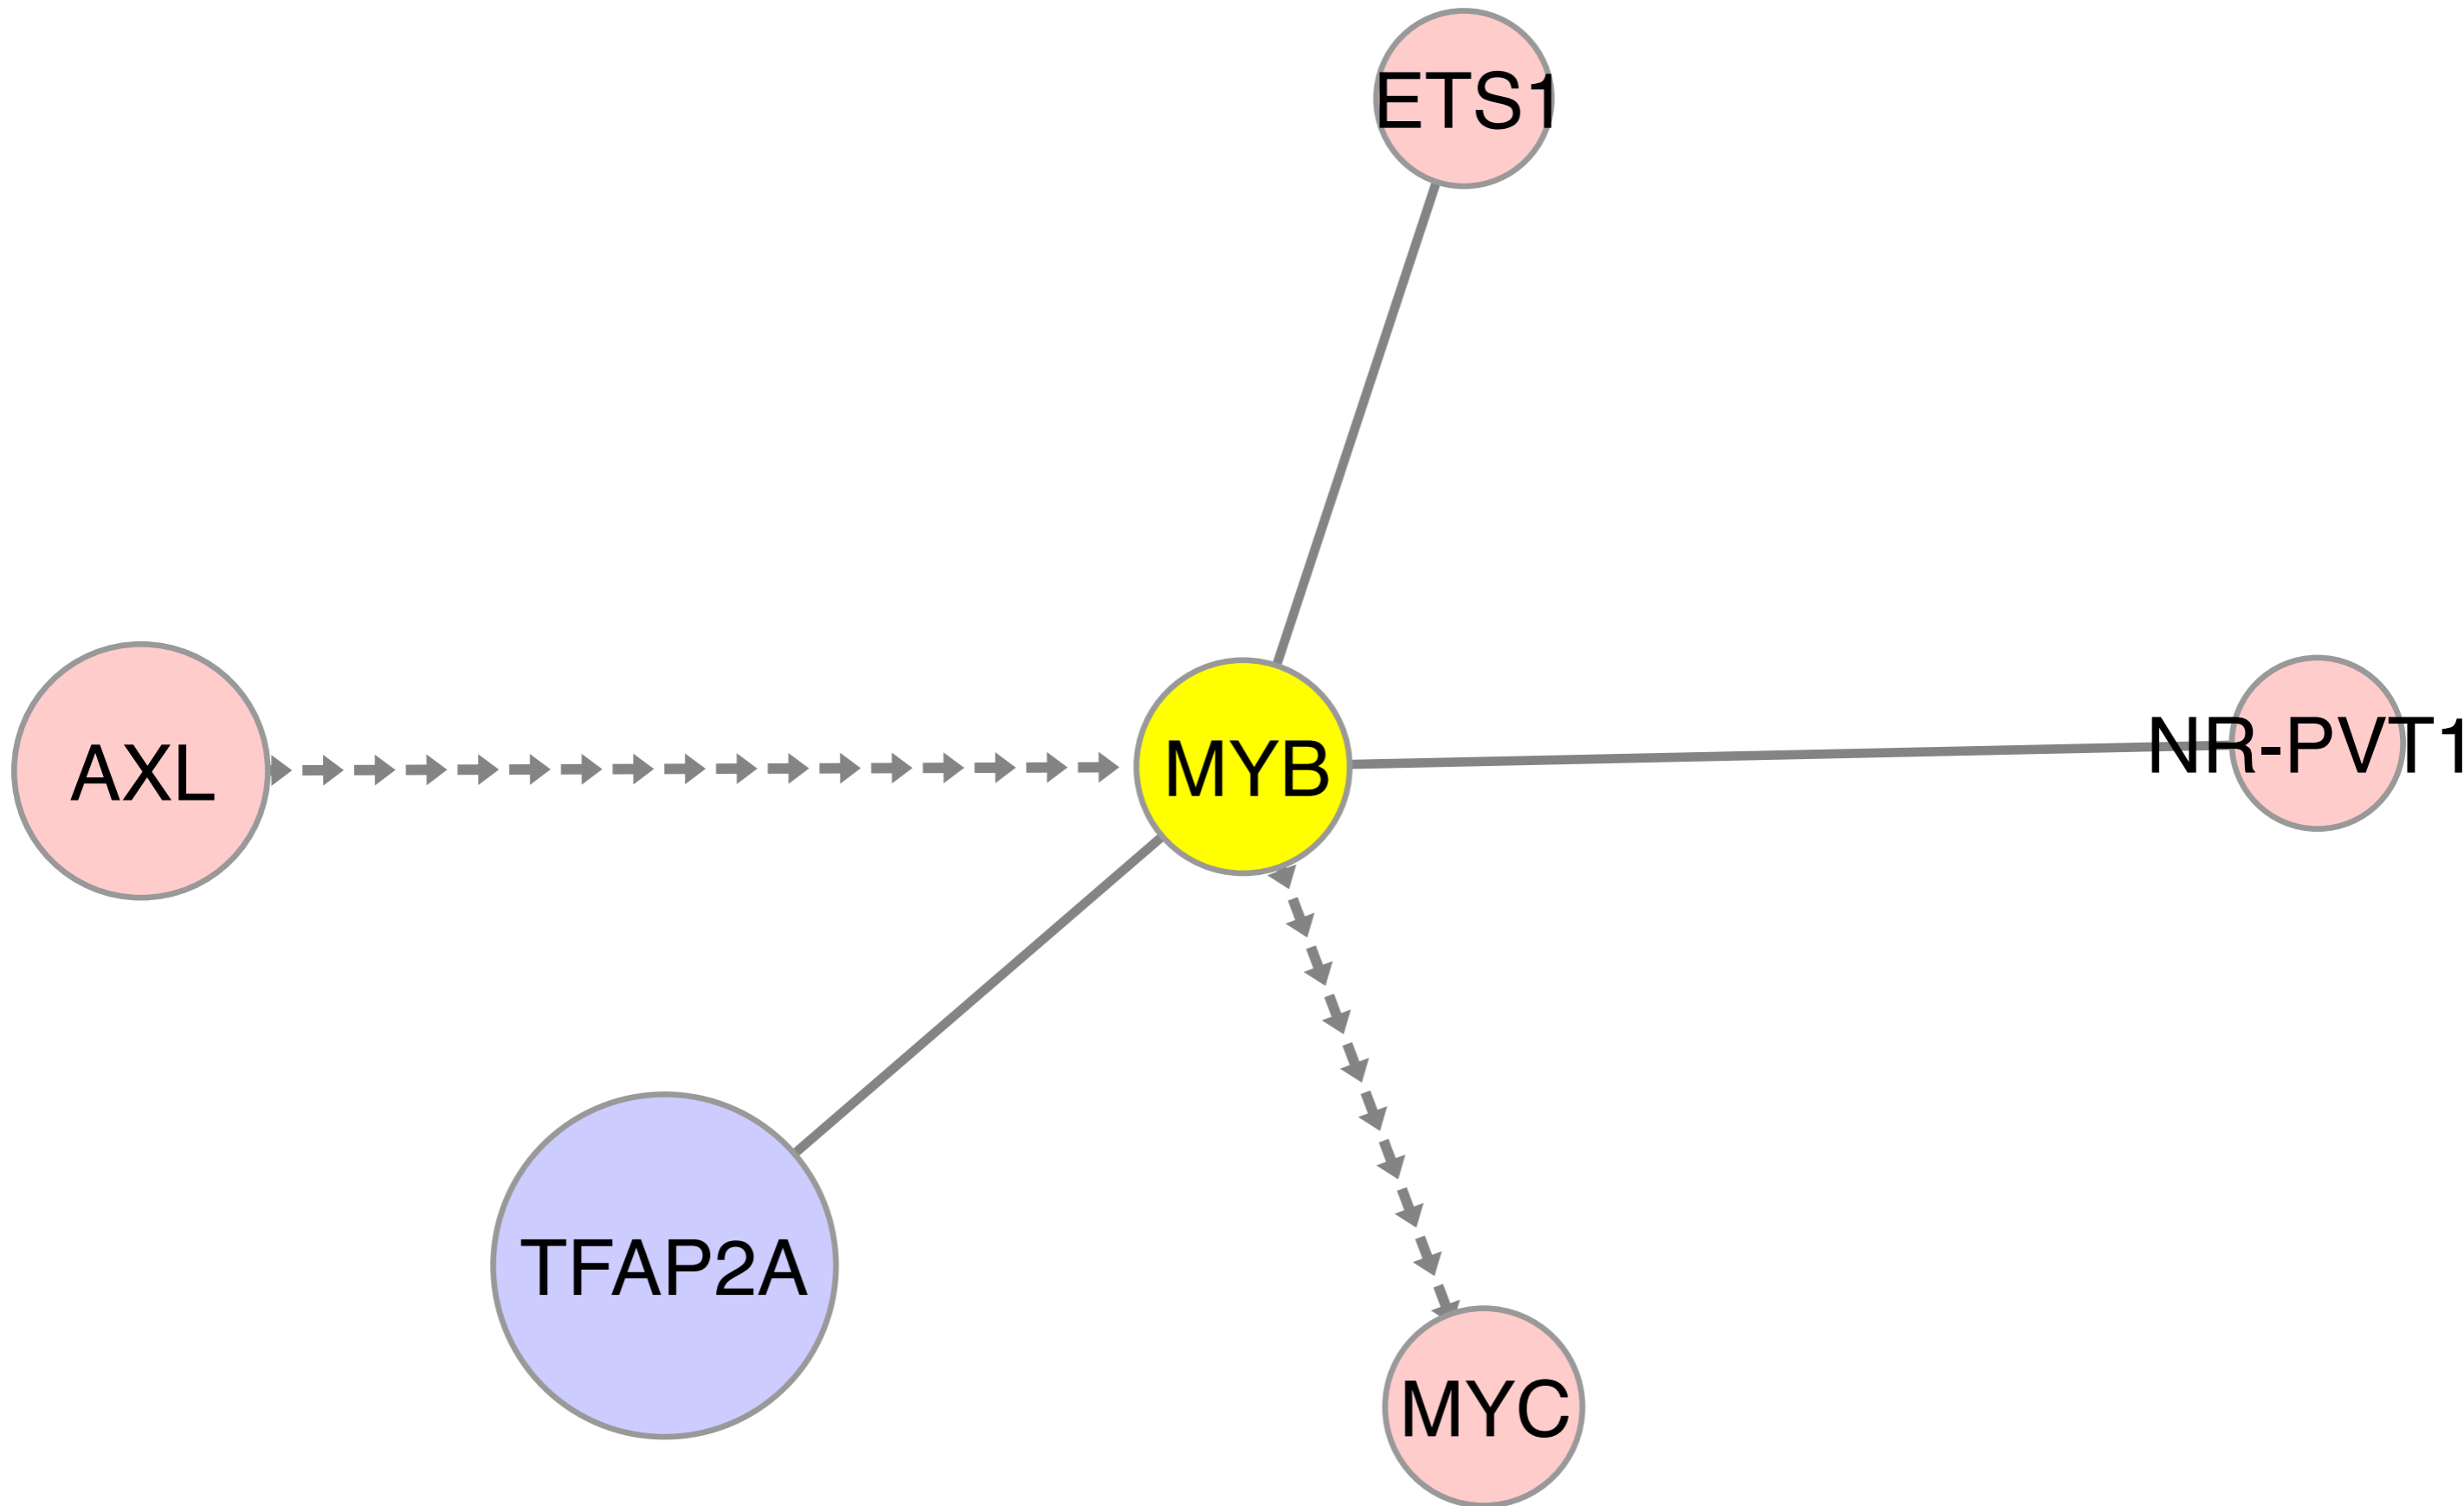

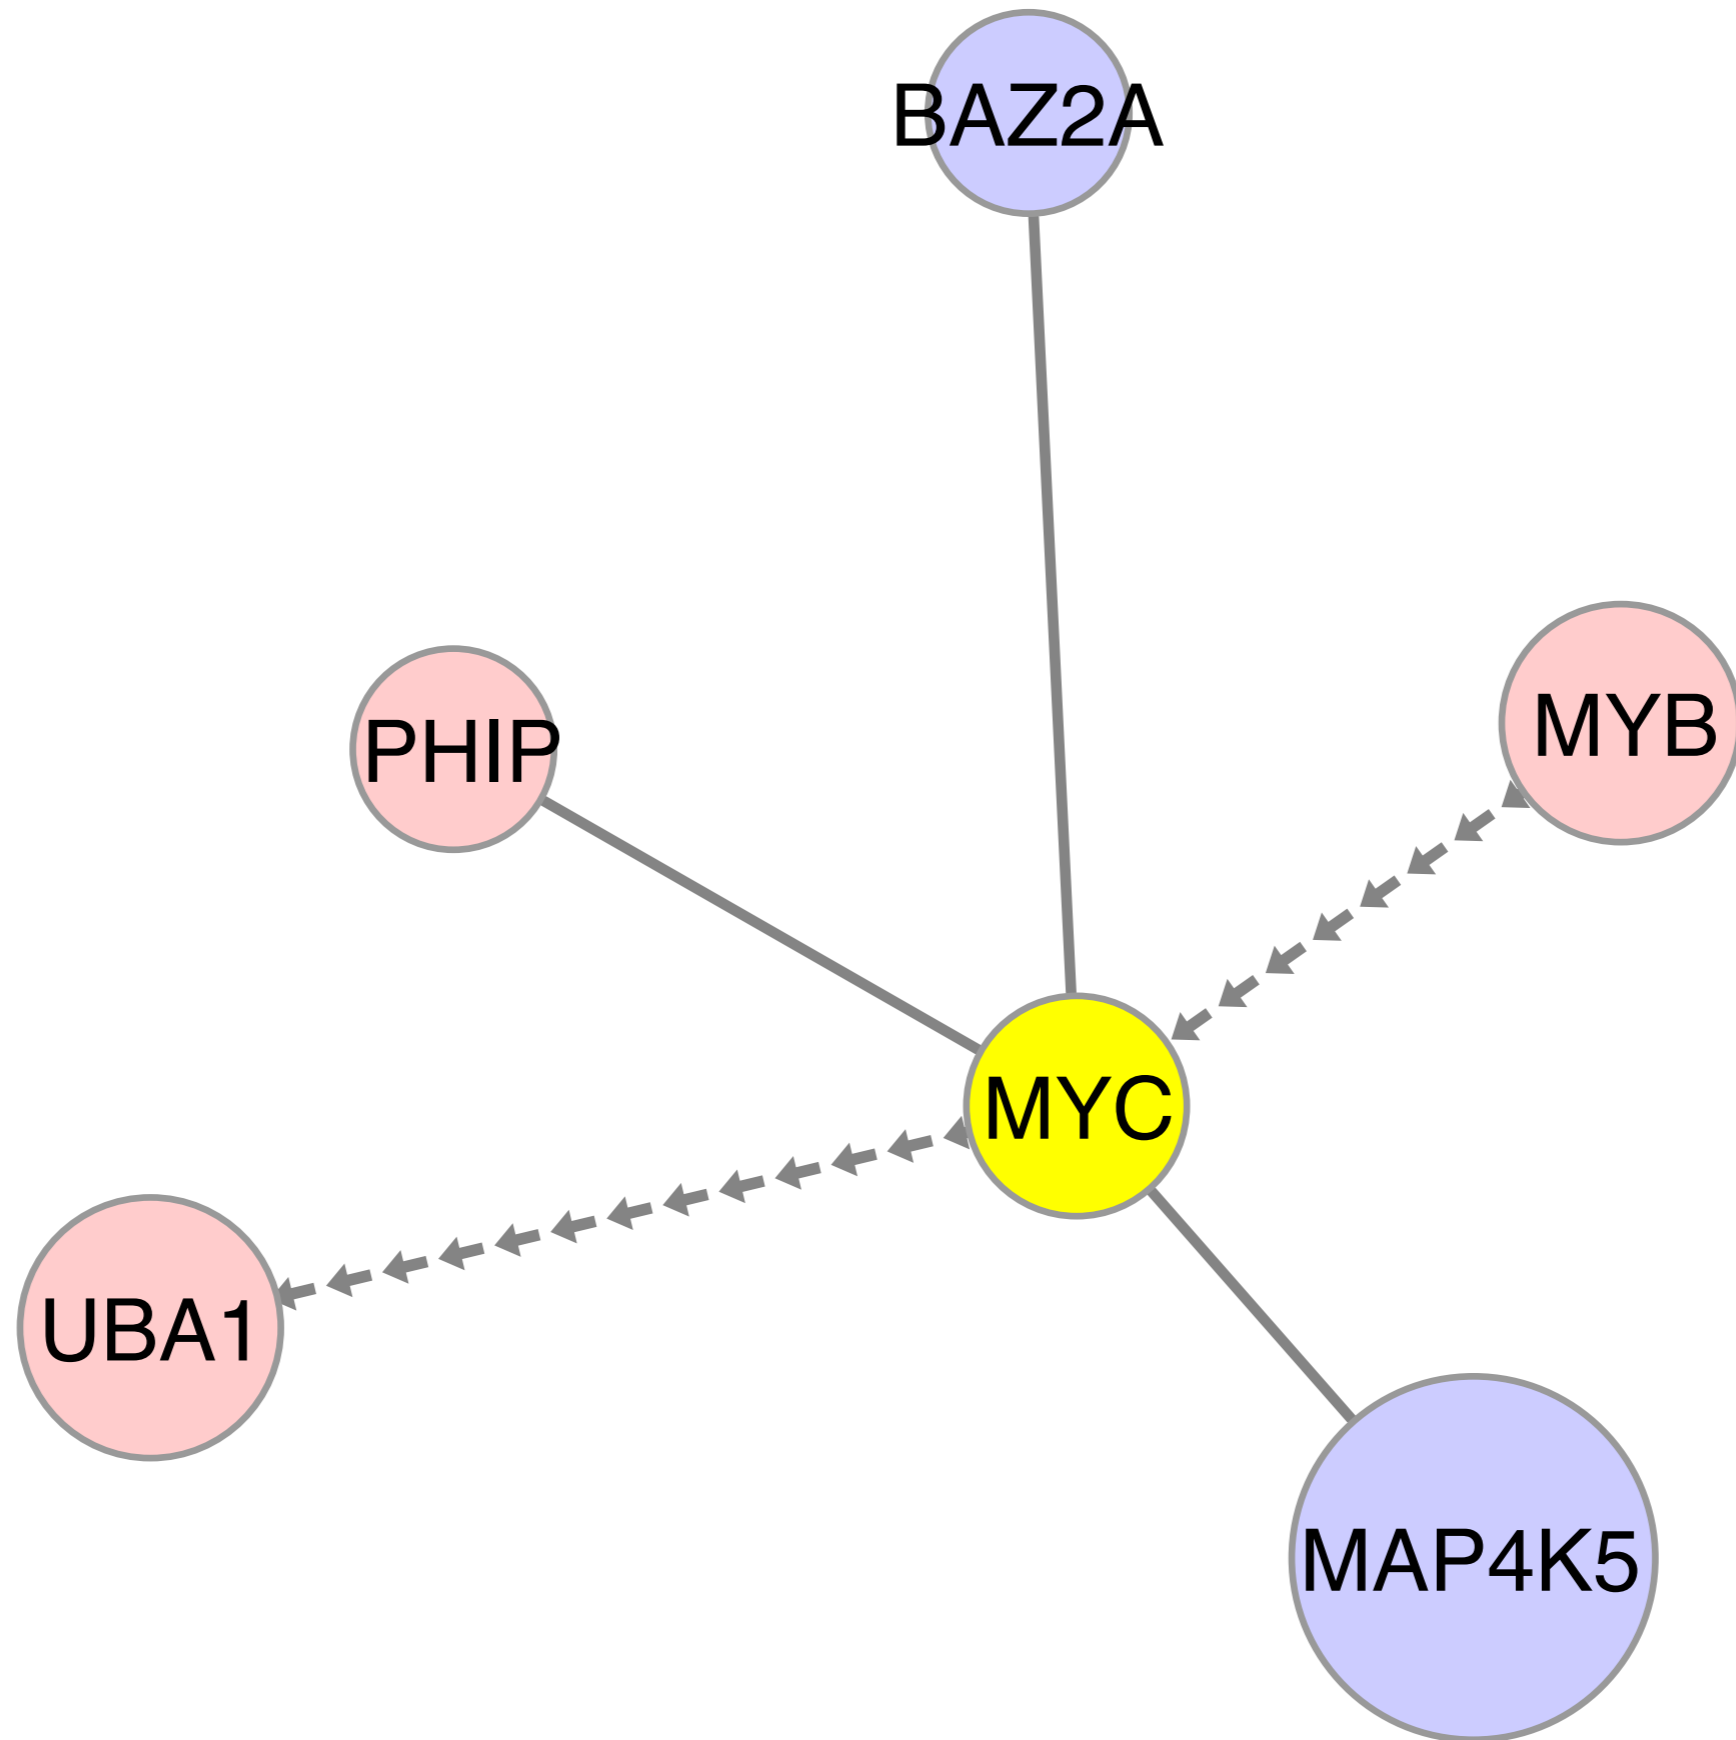

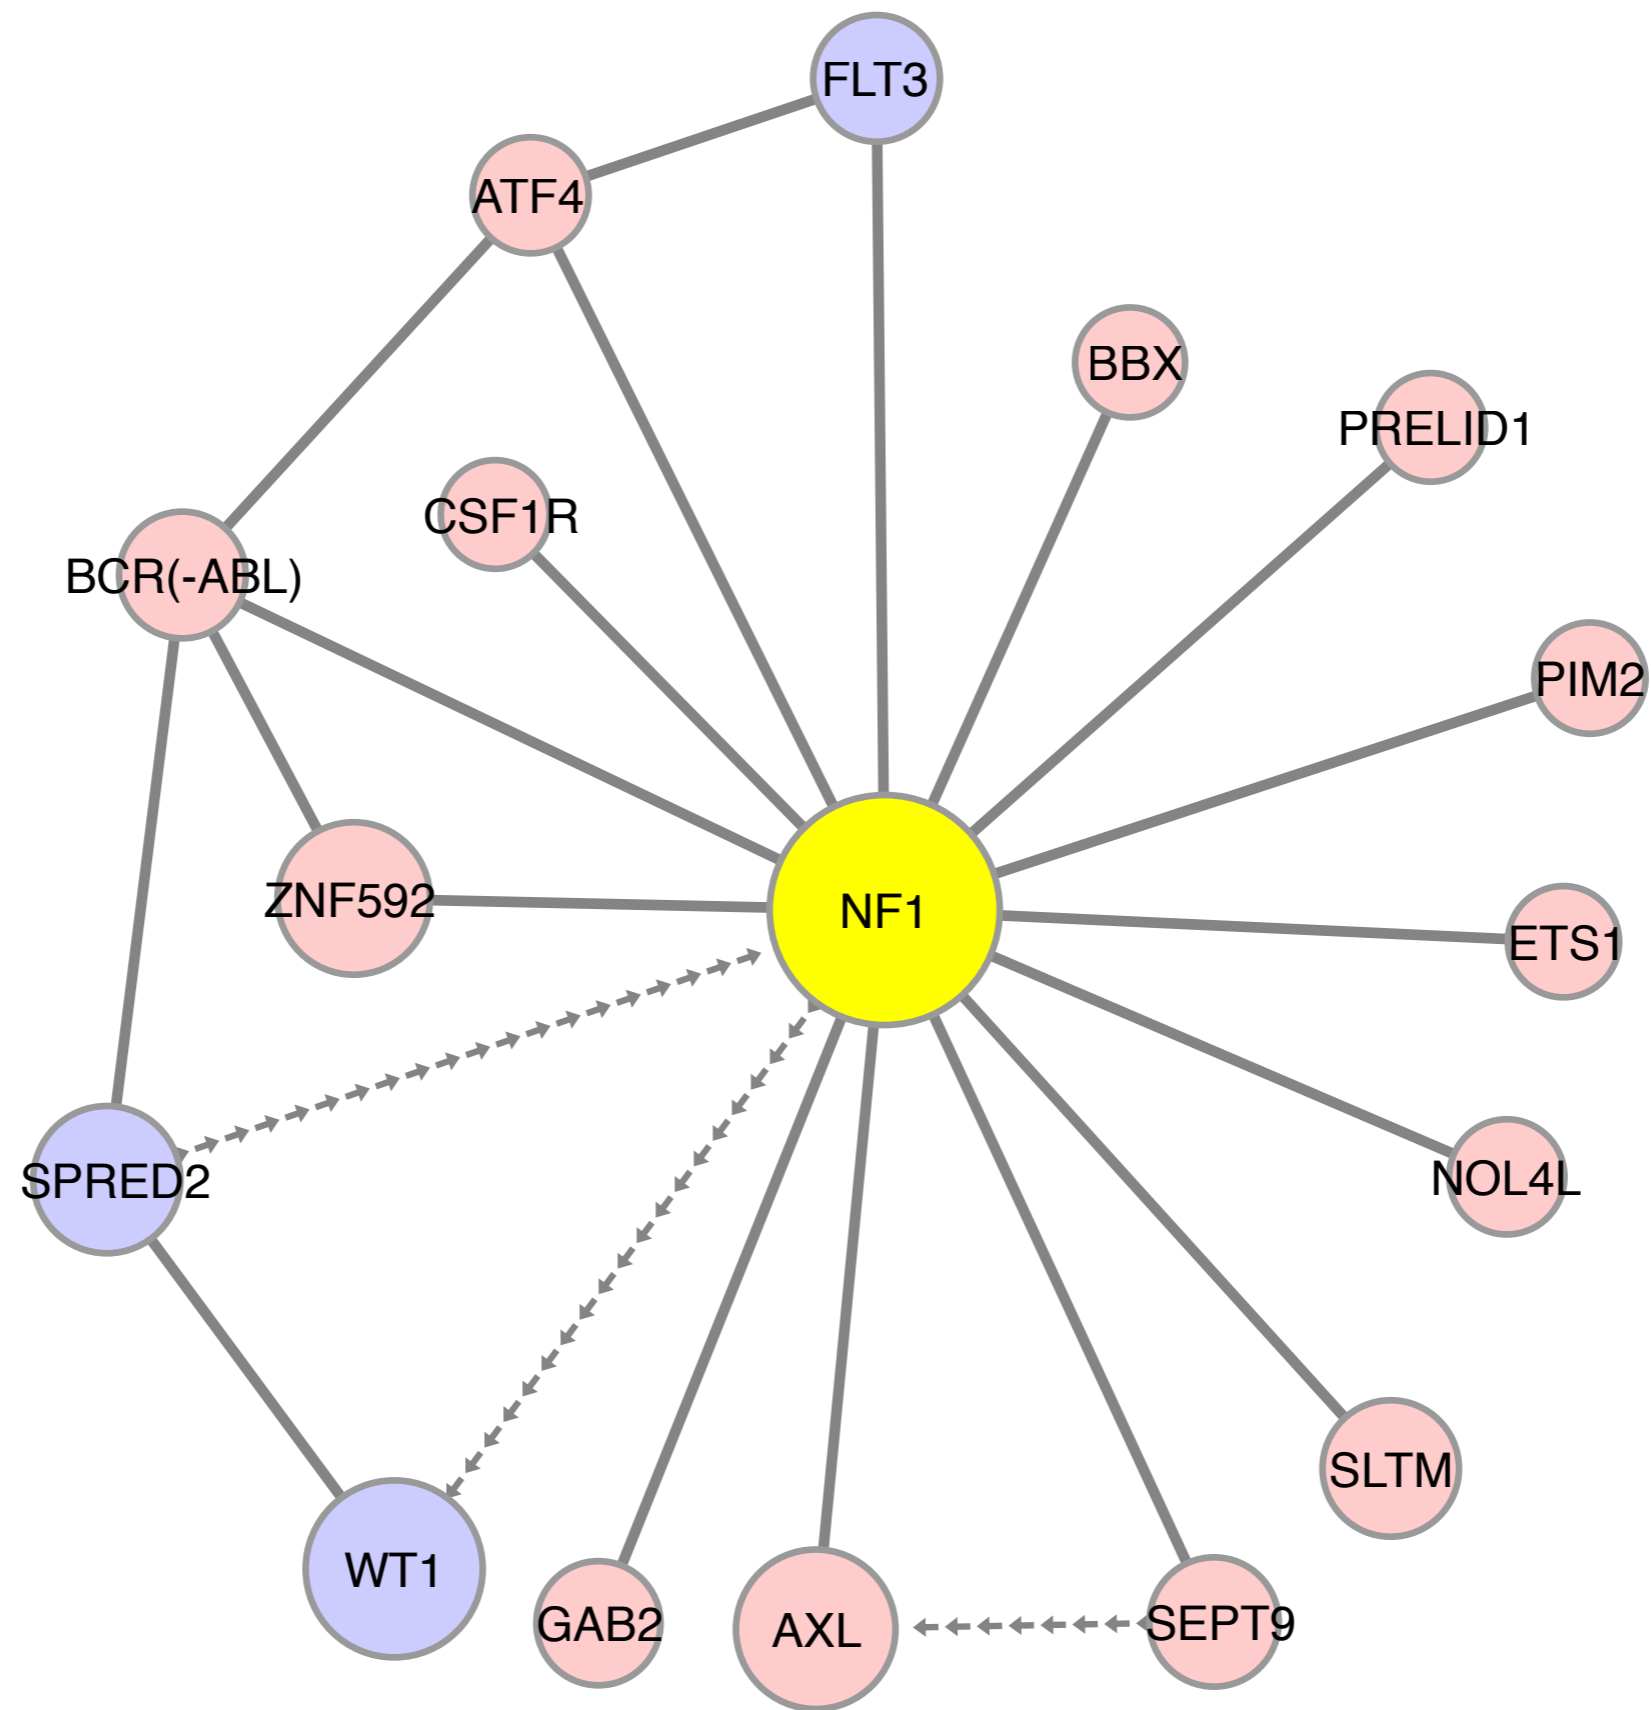

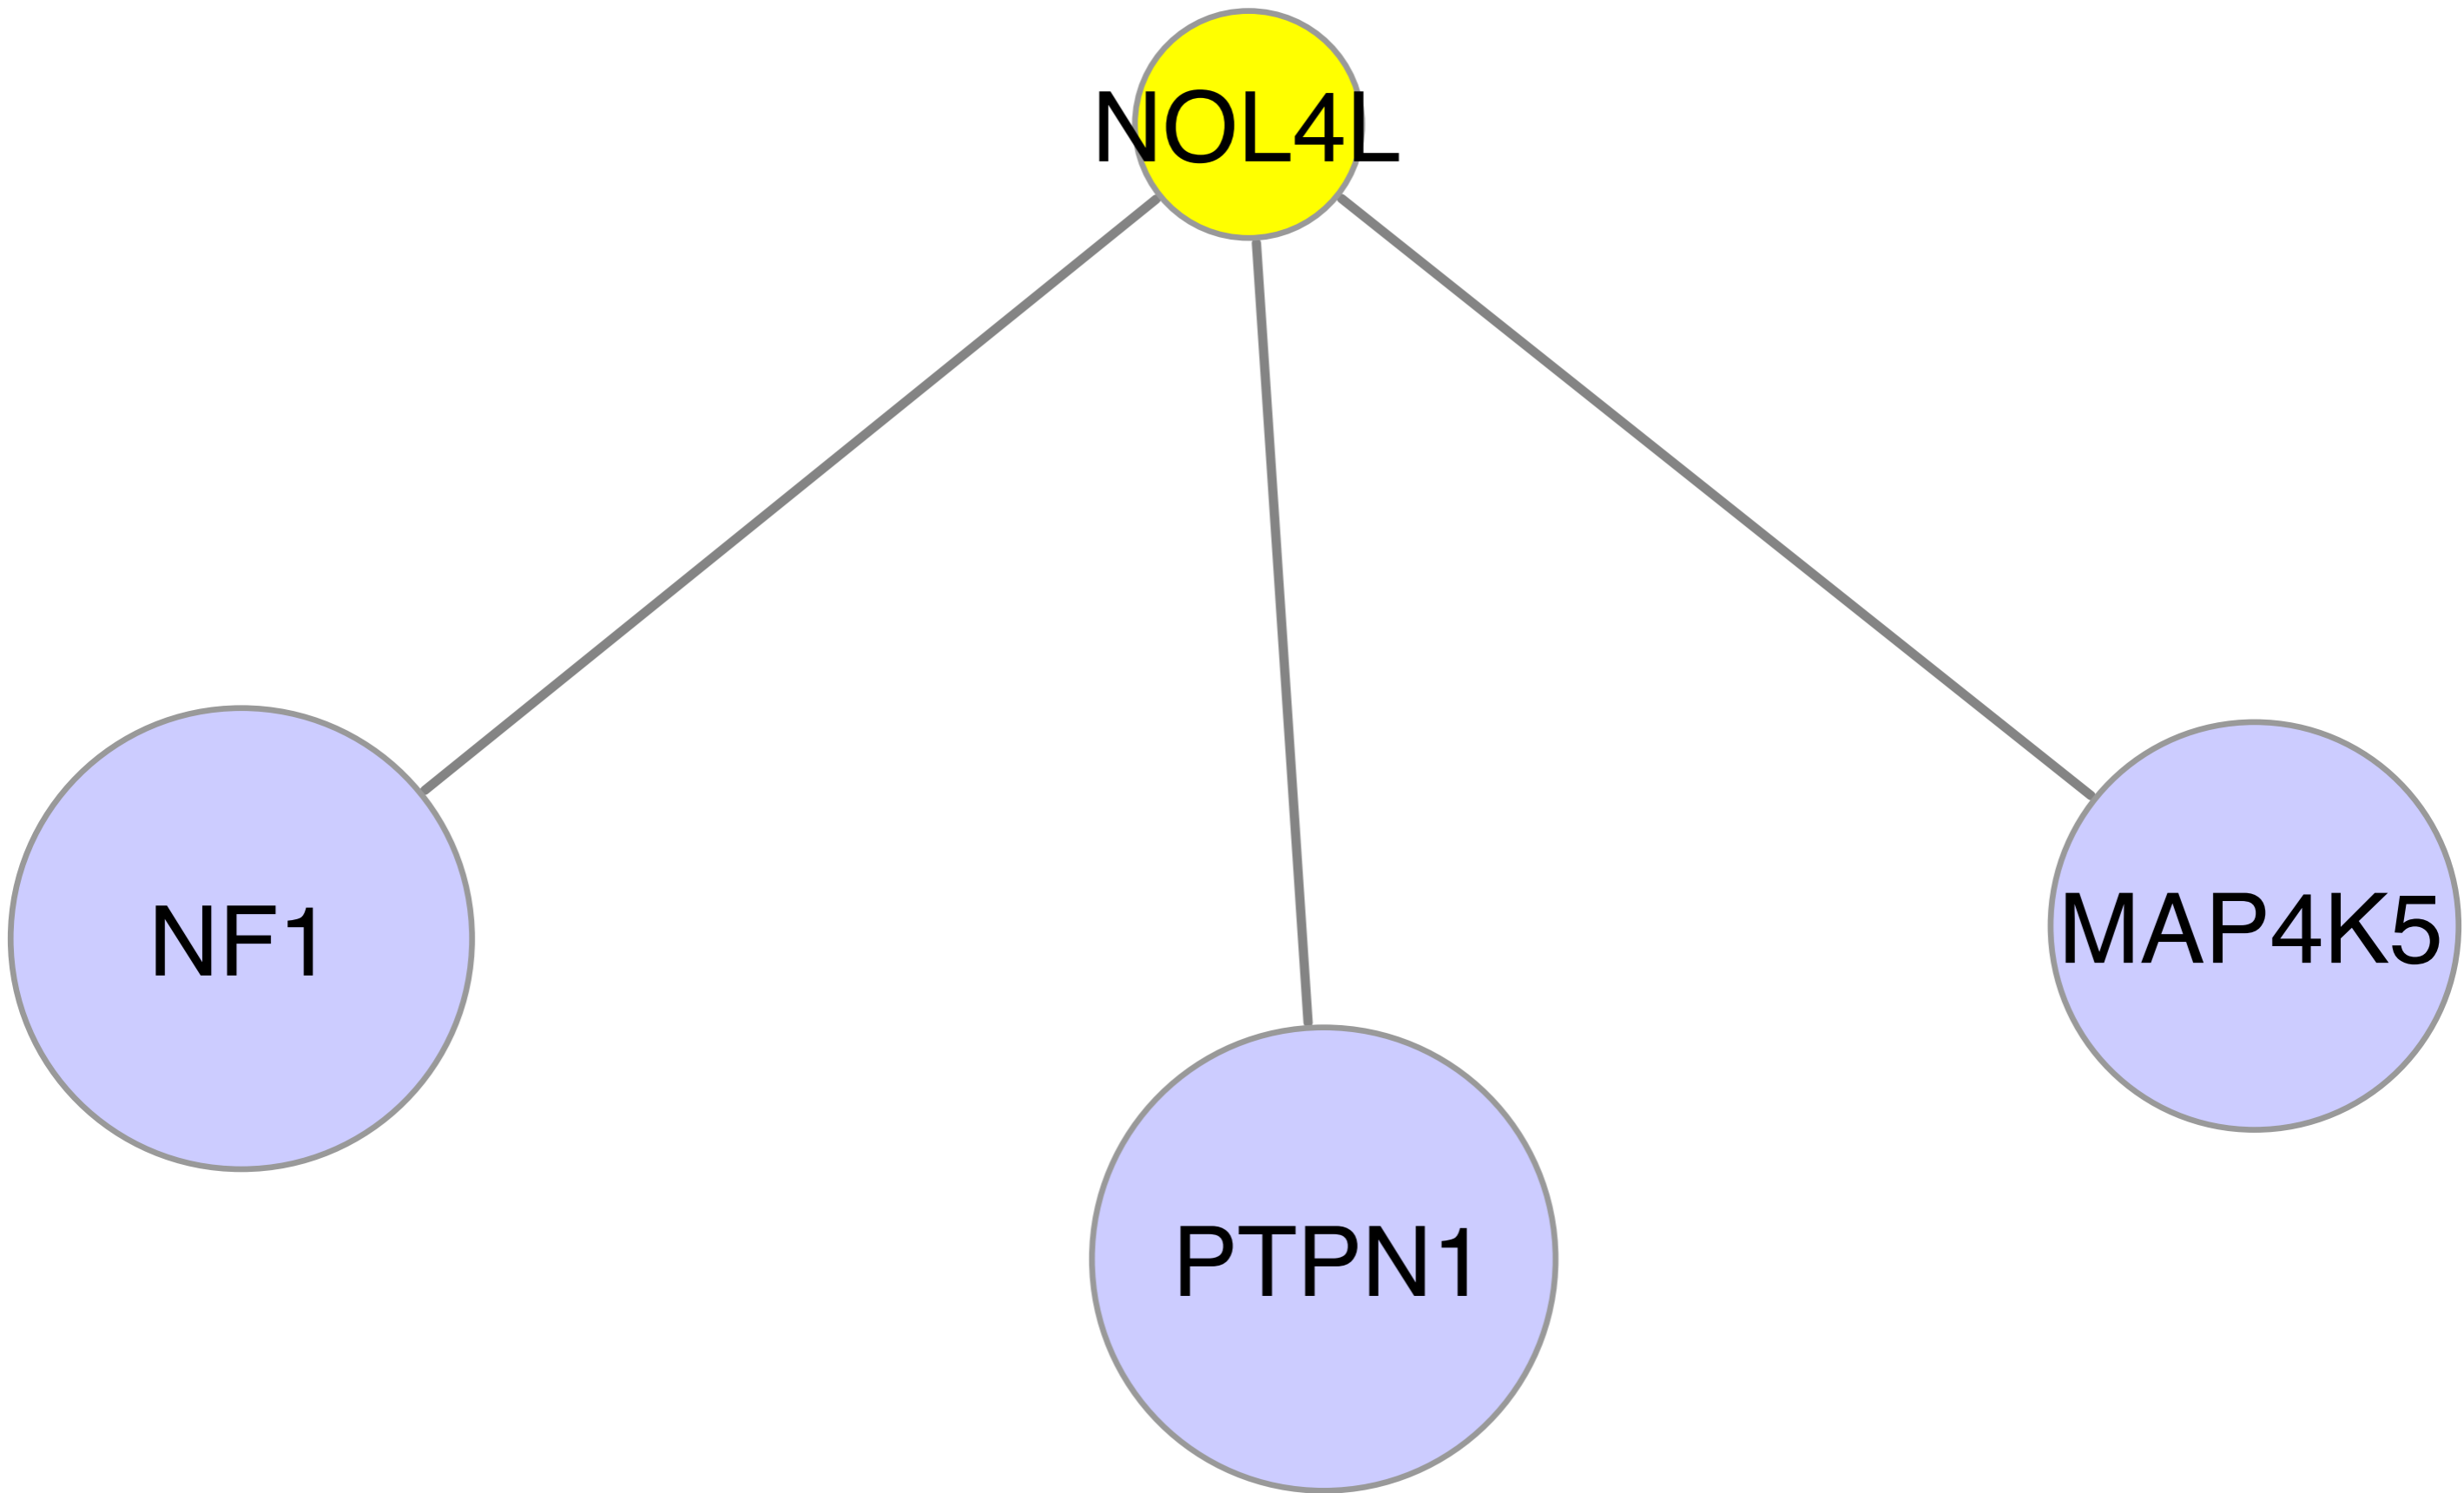

**NR-PVT1**

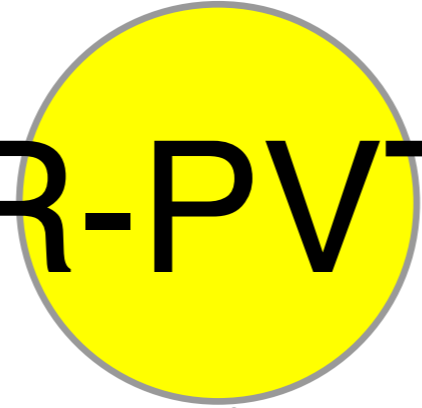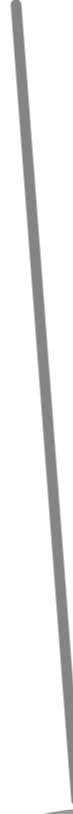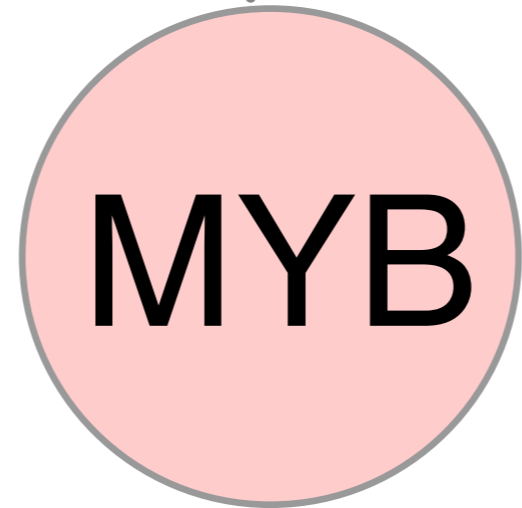

**MYB**

**NSD1**

**RANBP**

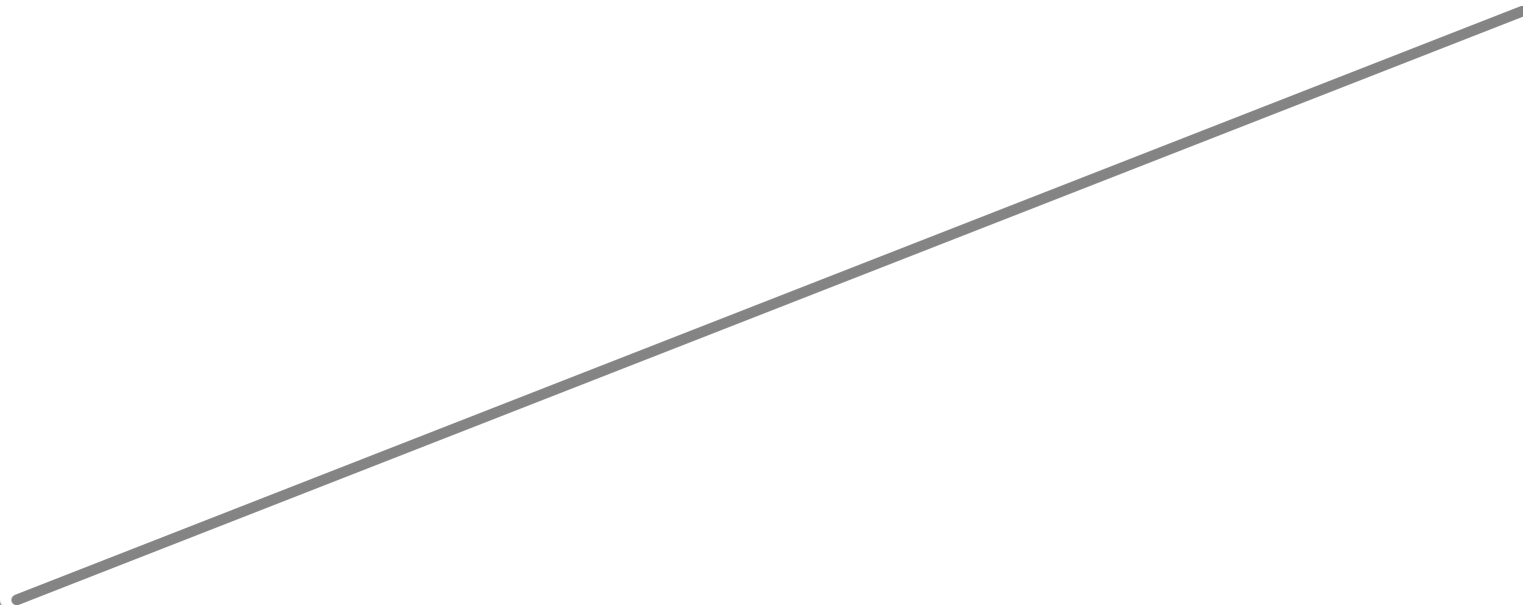

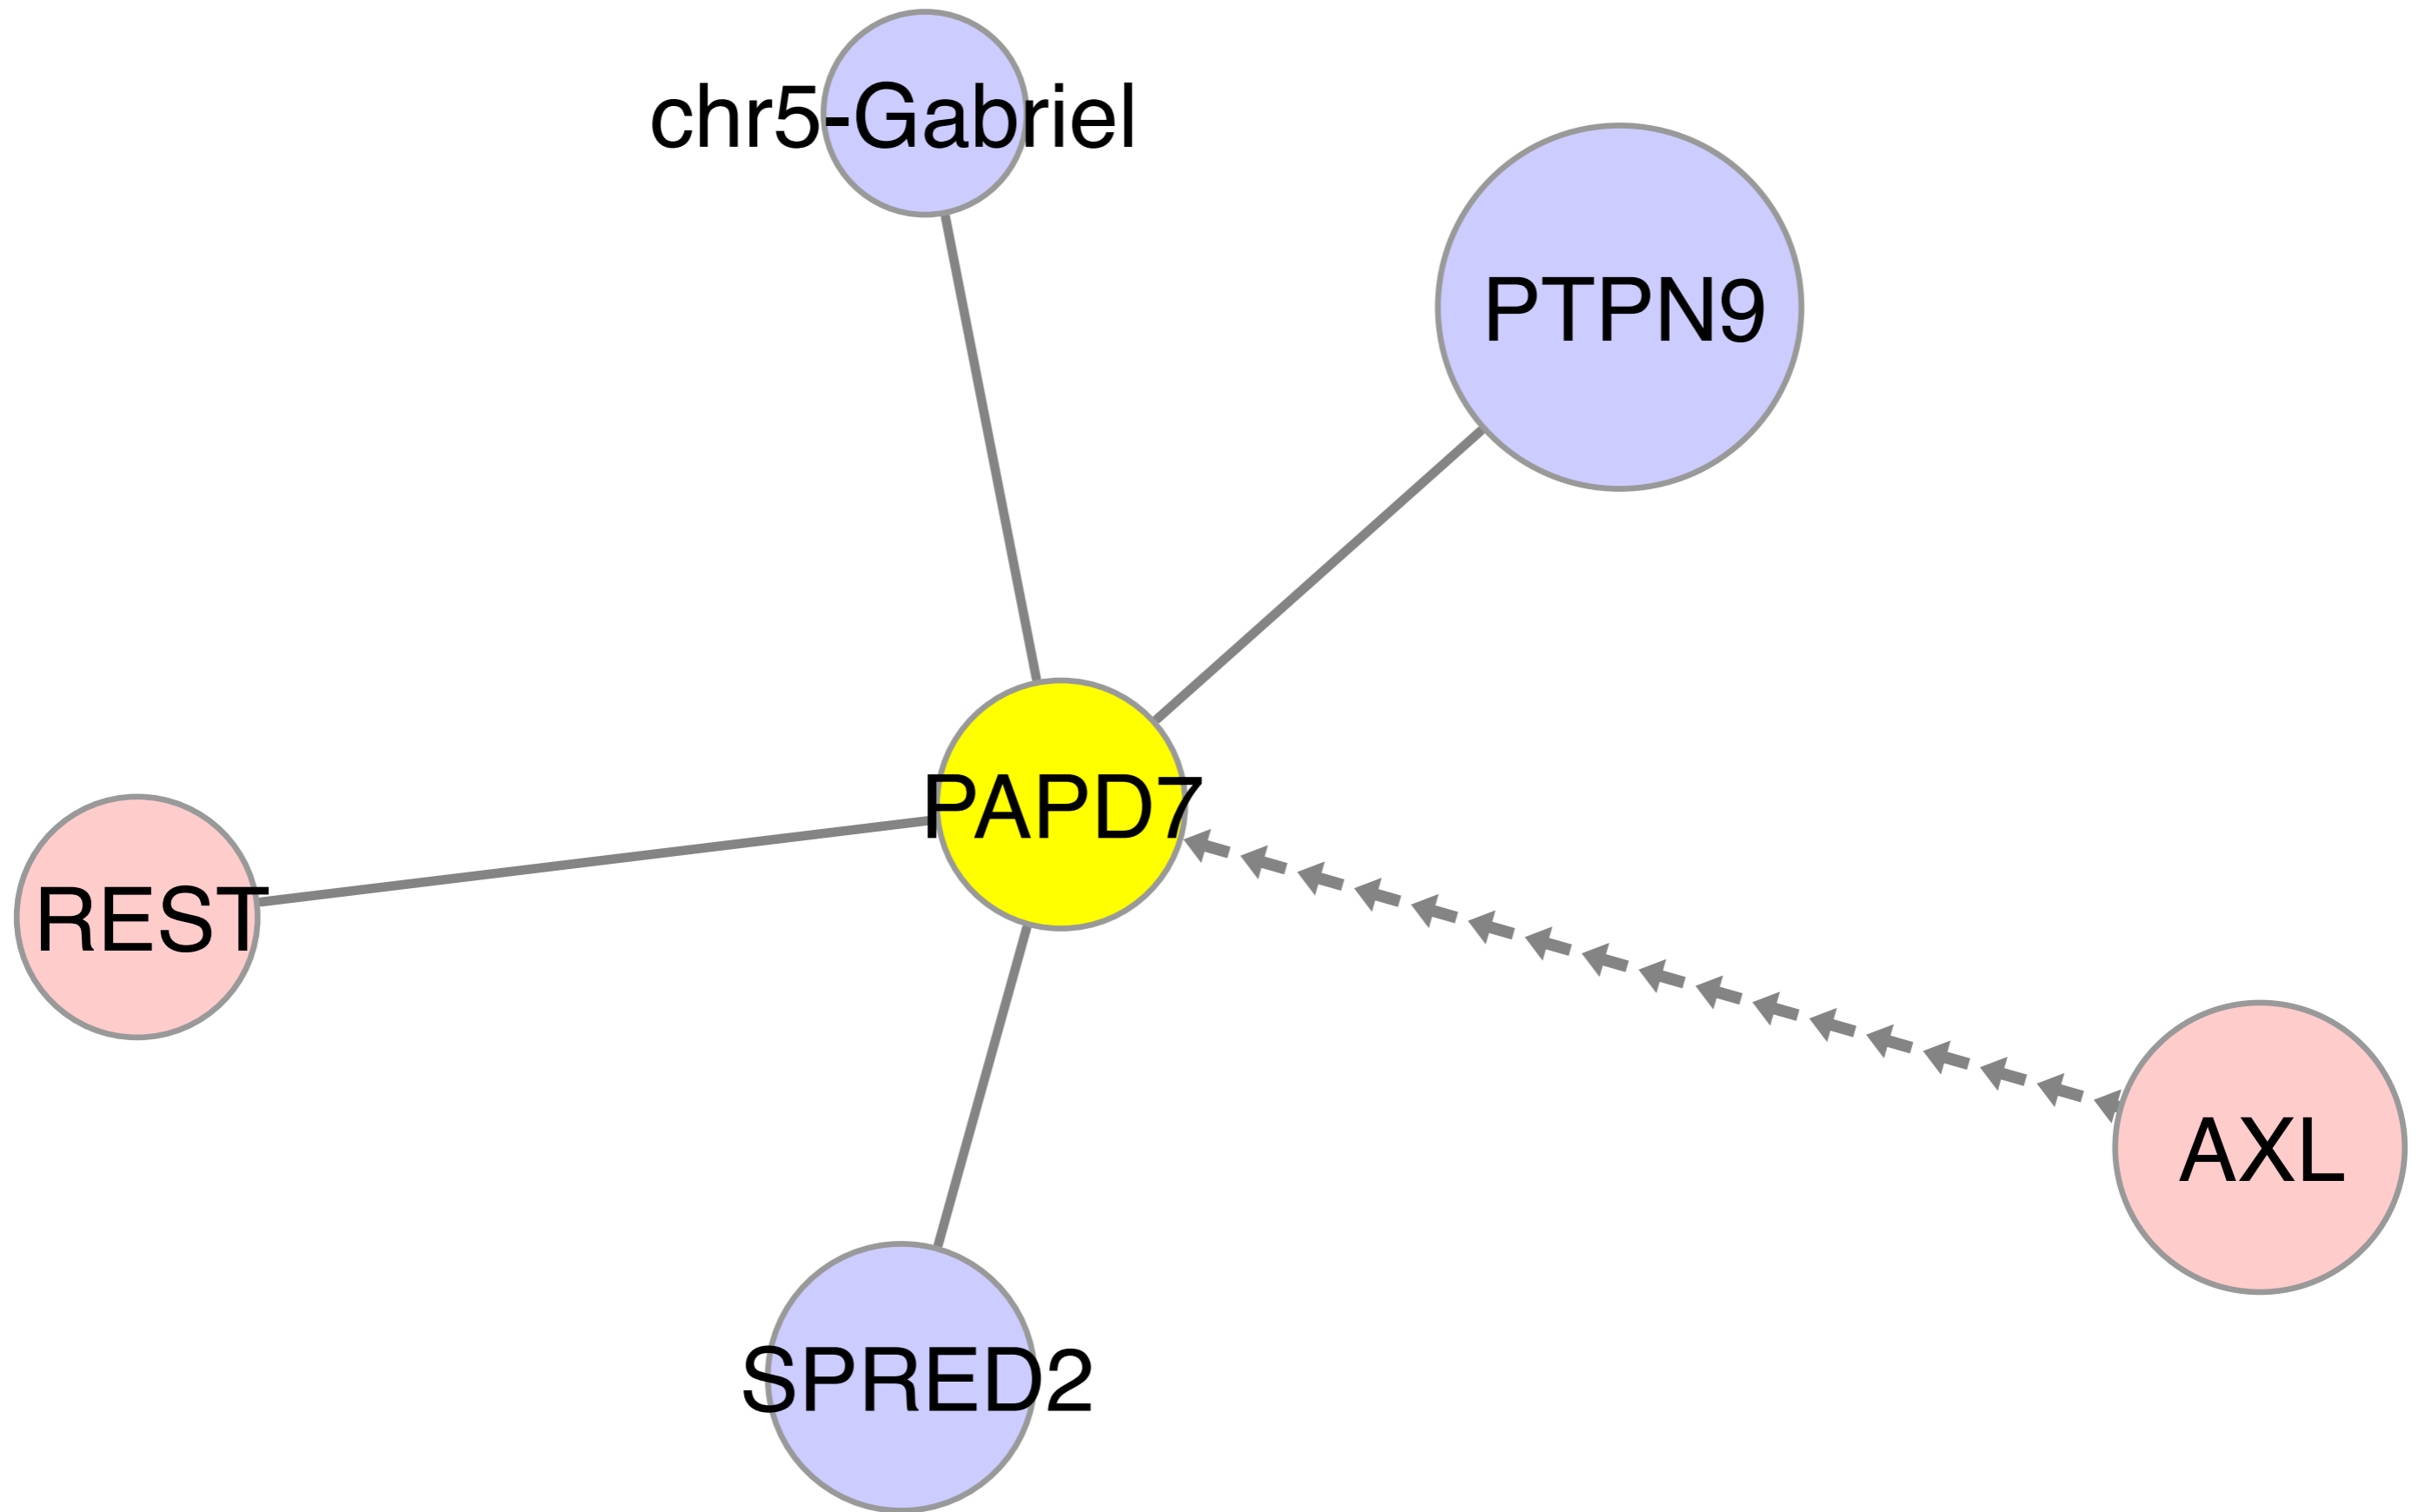



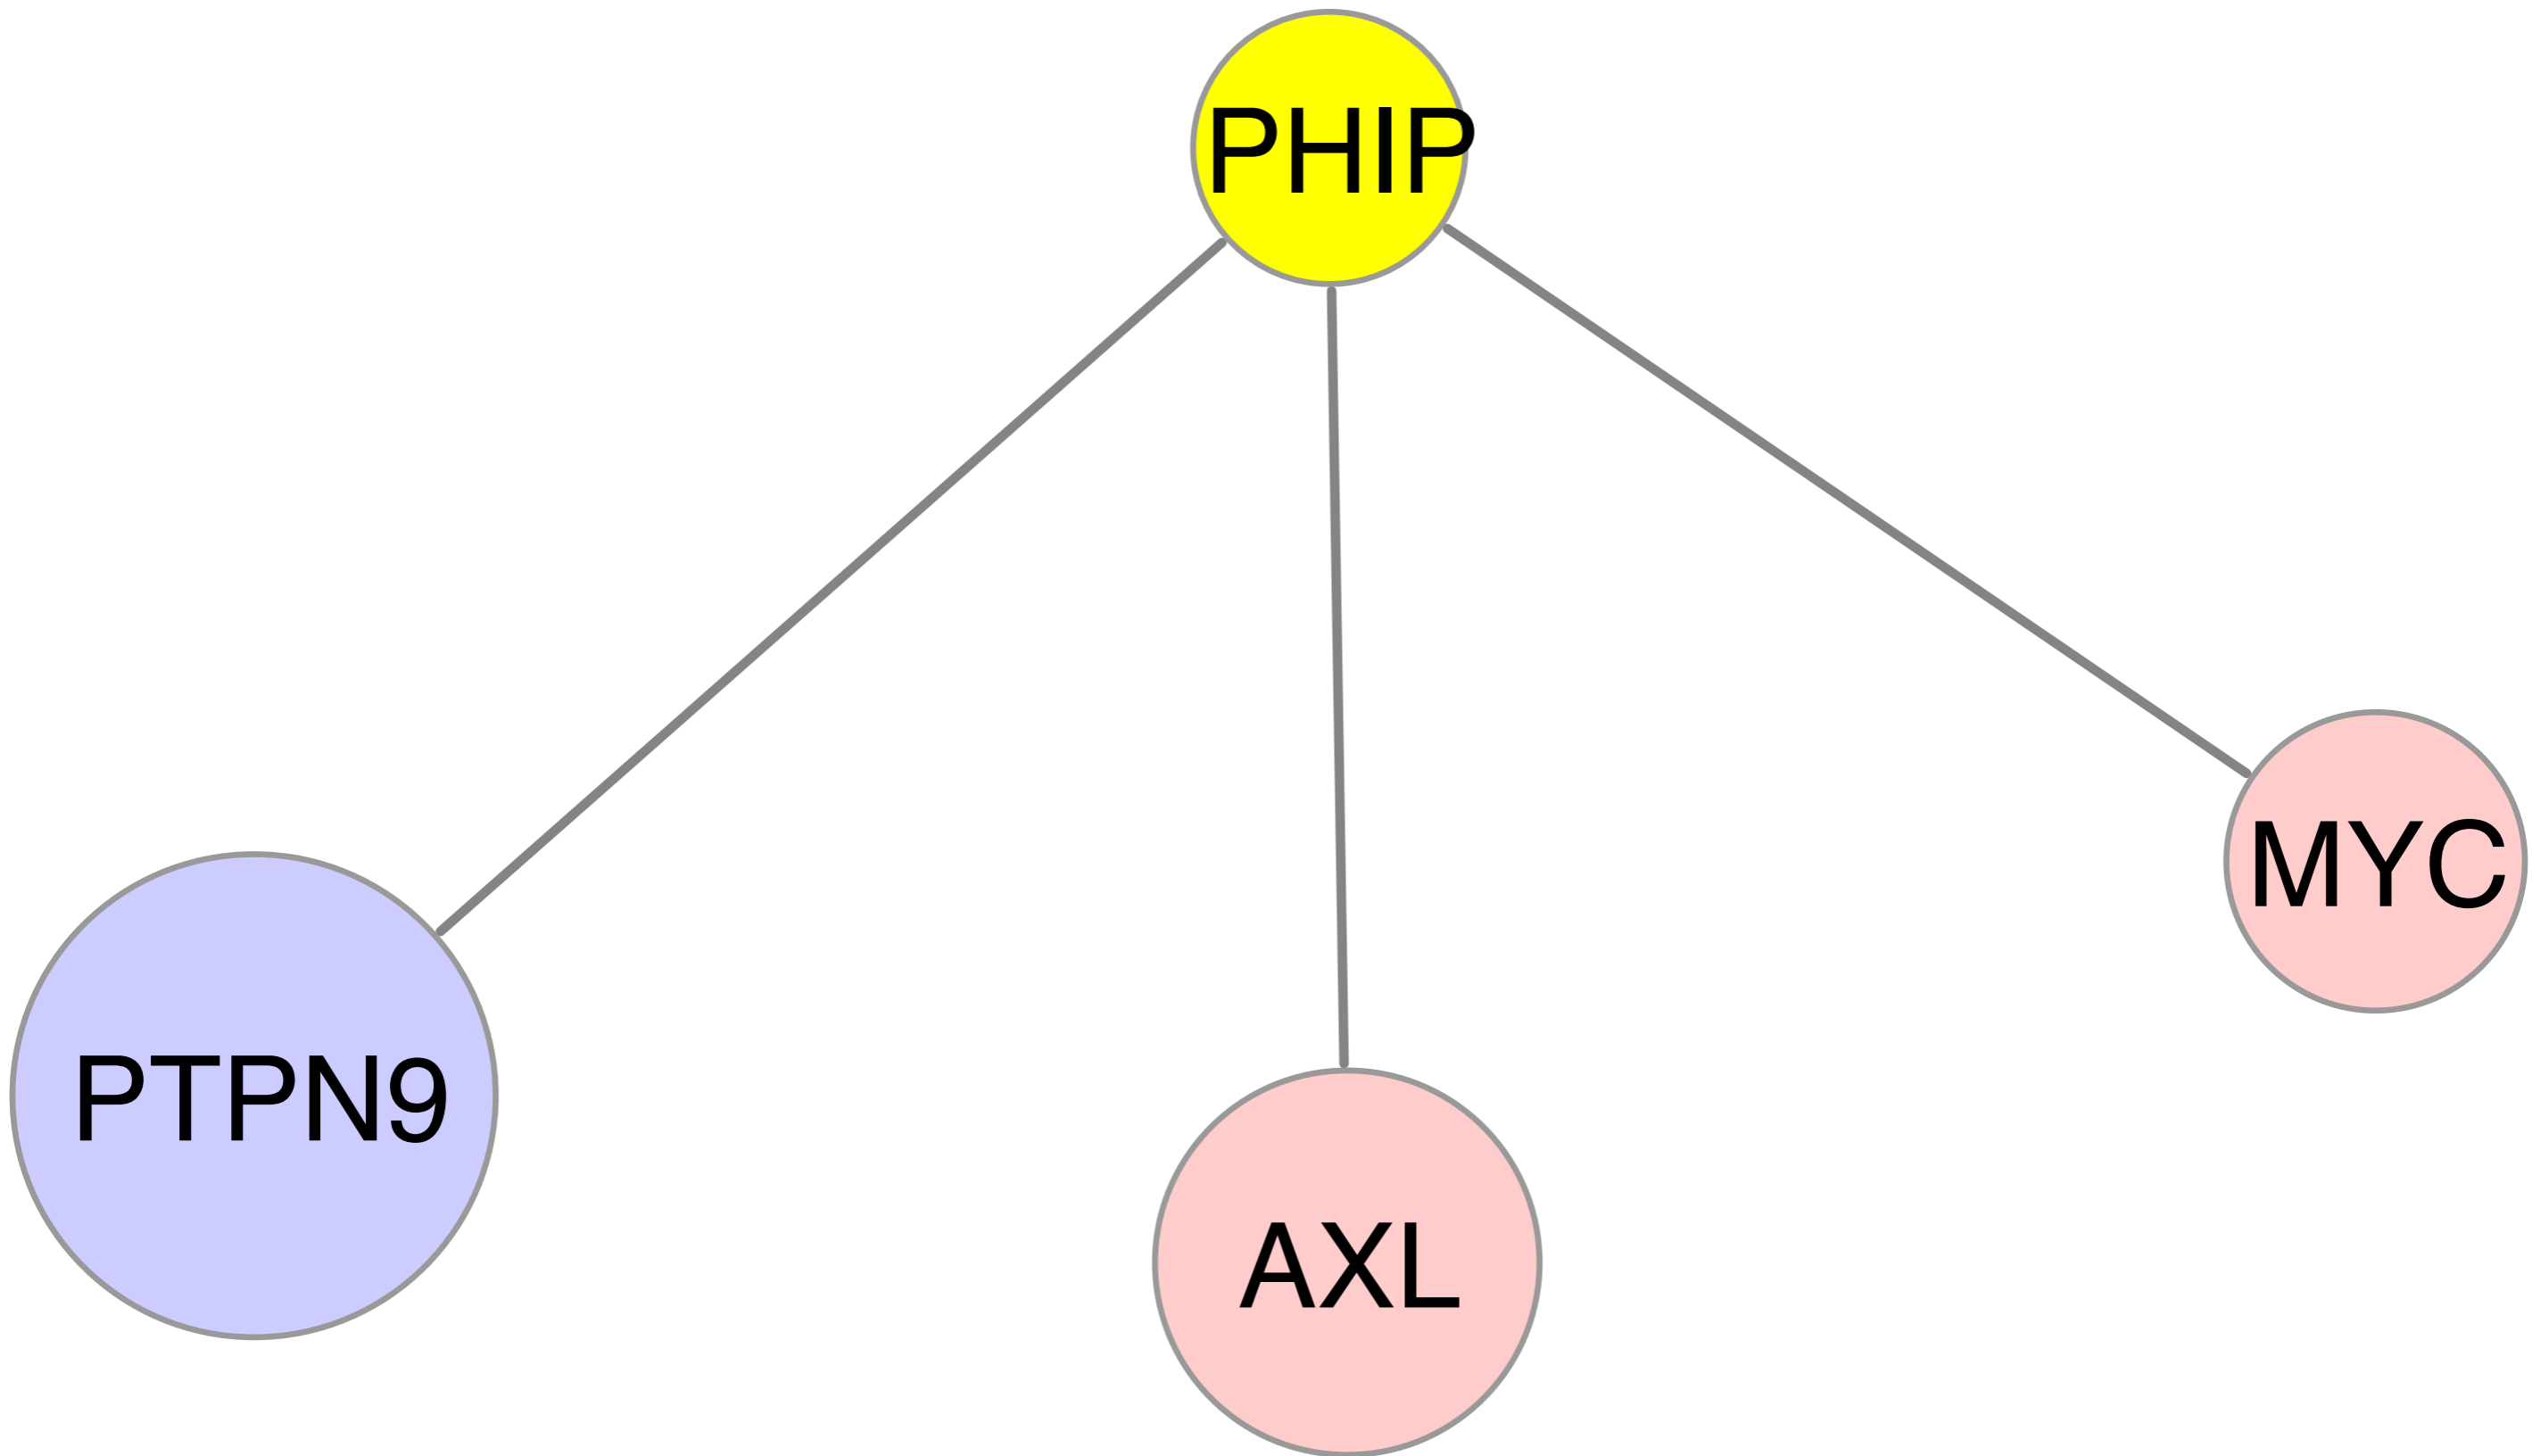

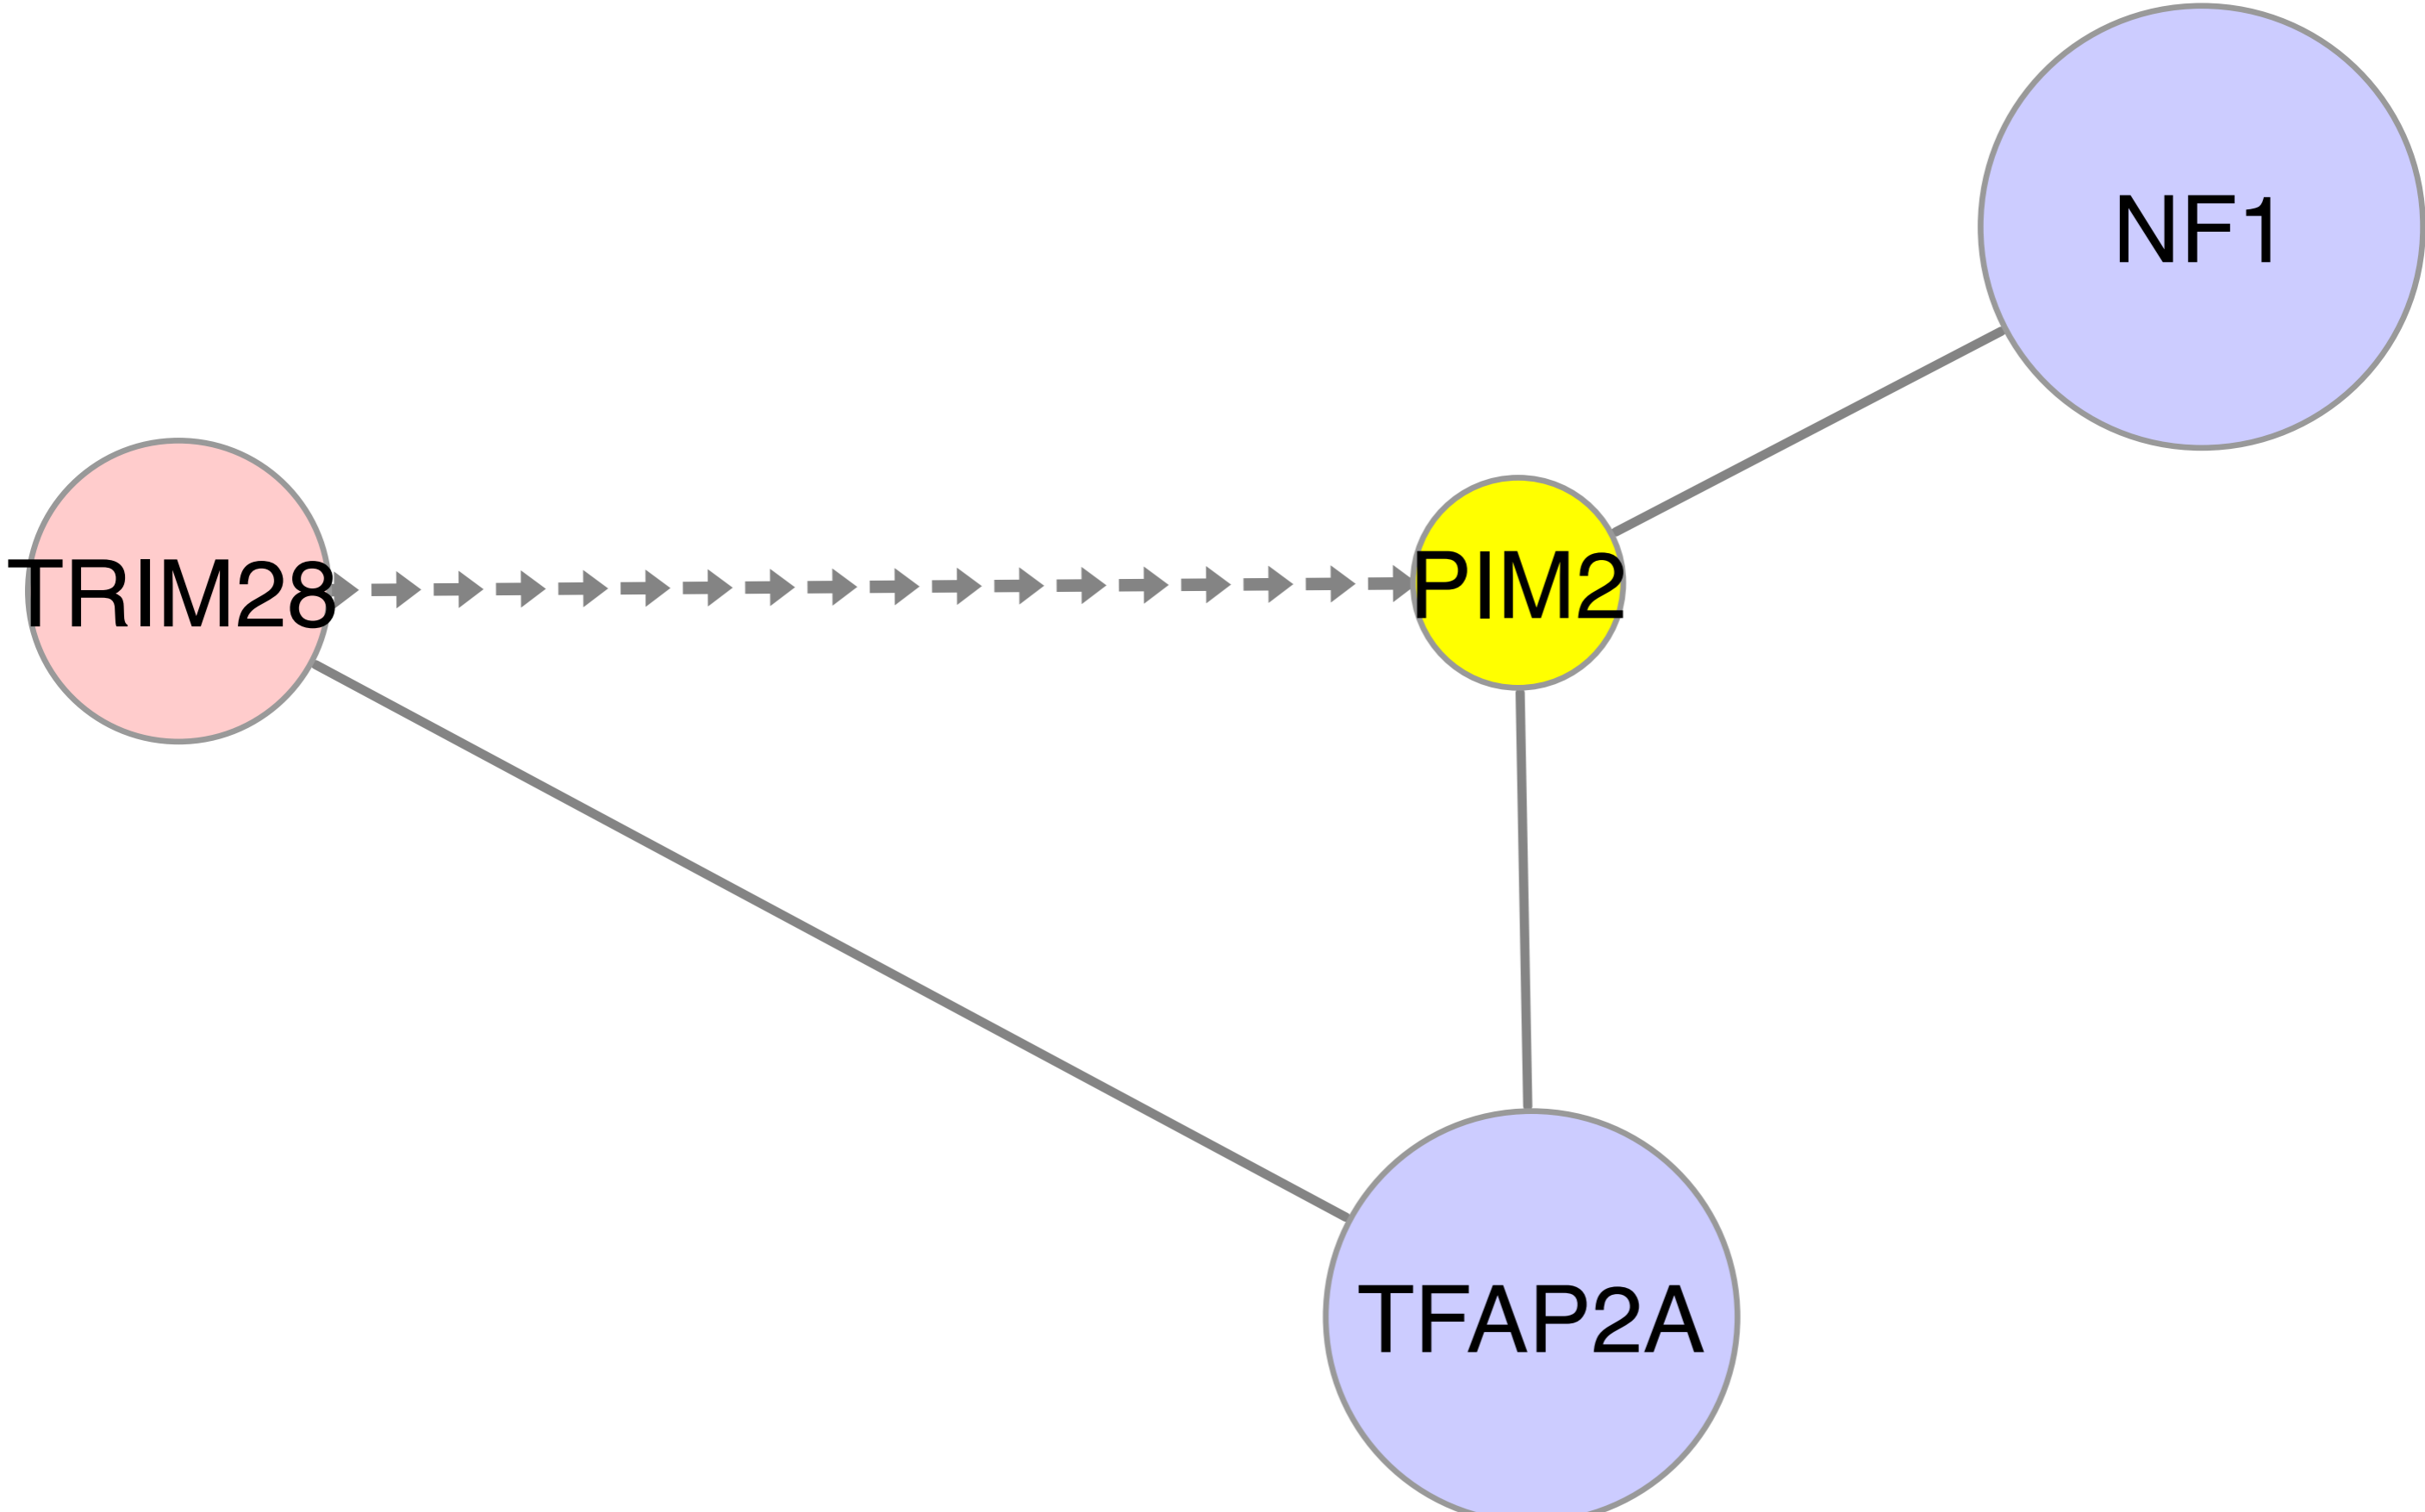

**MAP4K5**

**PIM3**

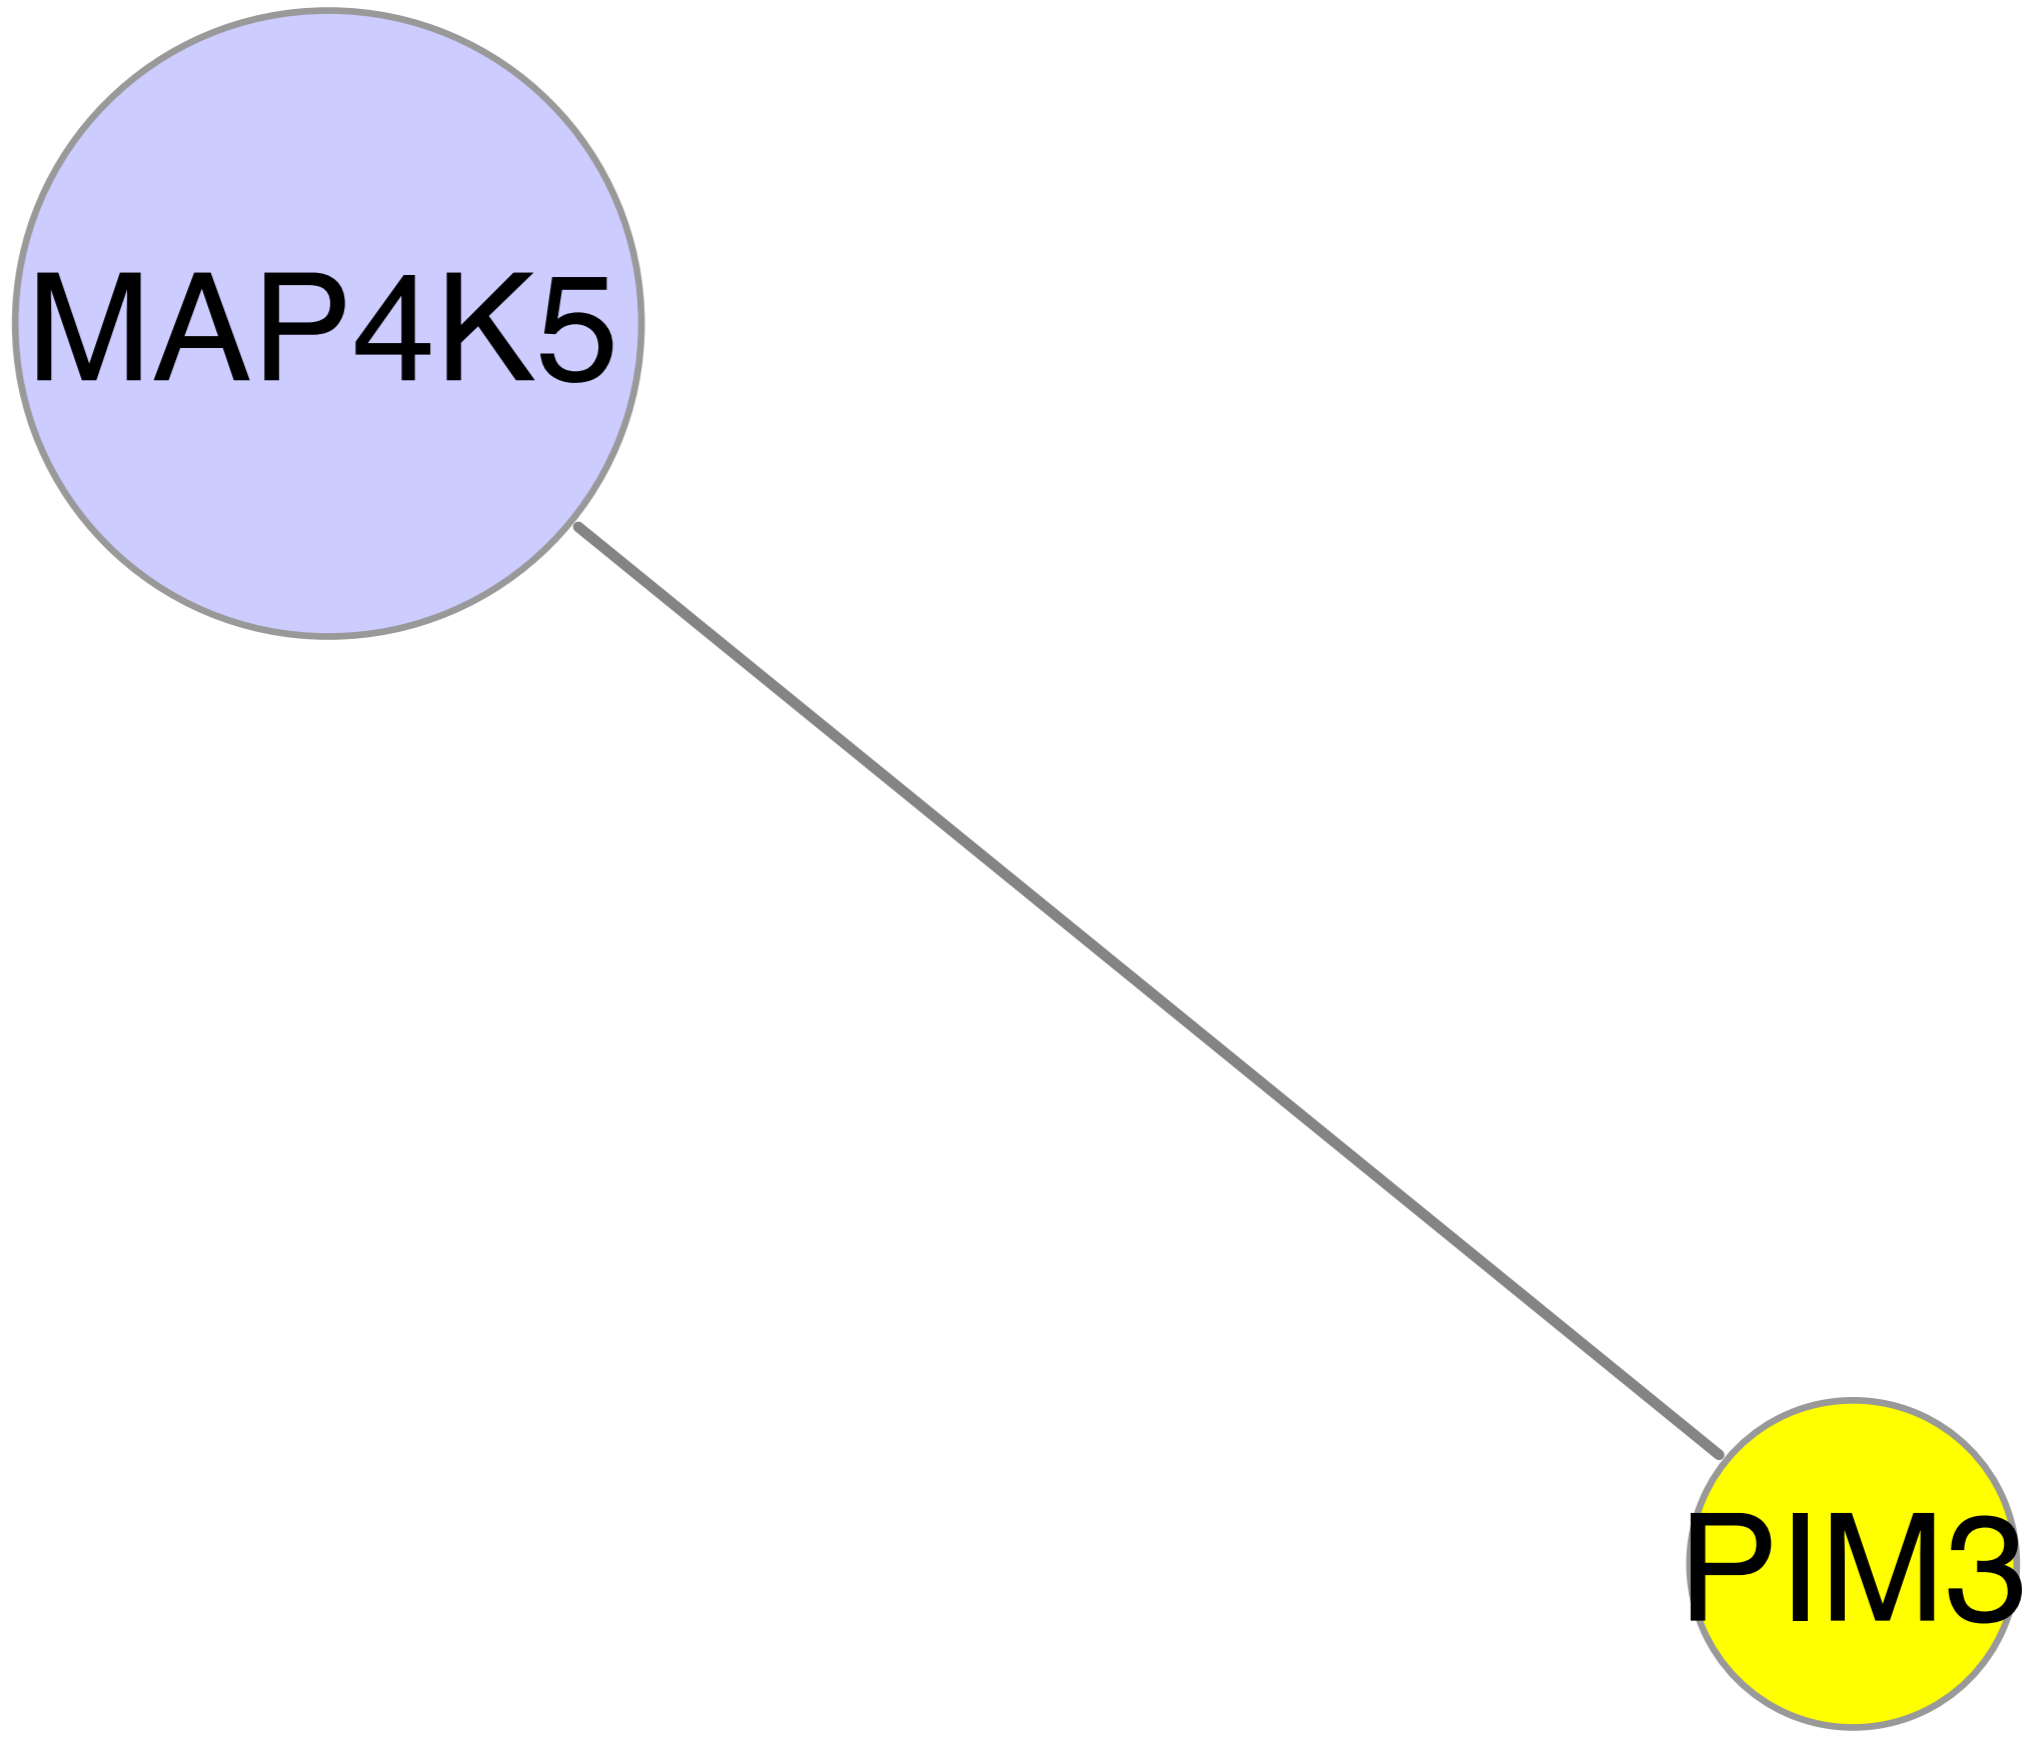

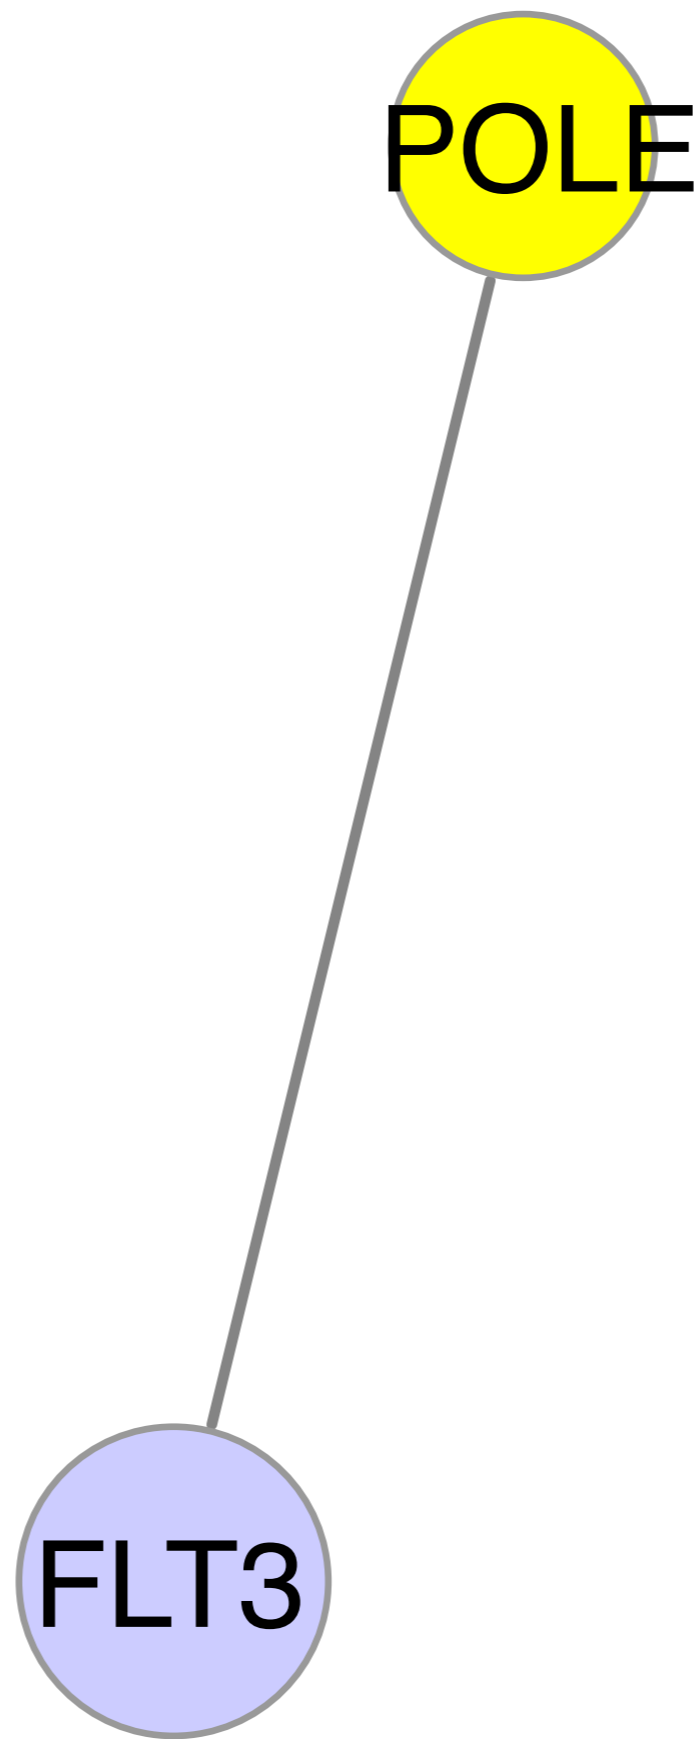

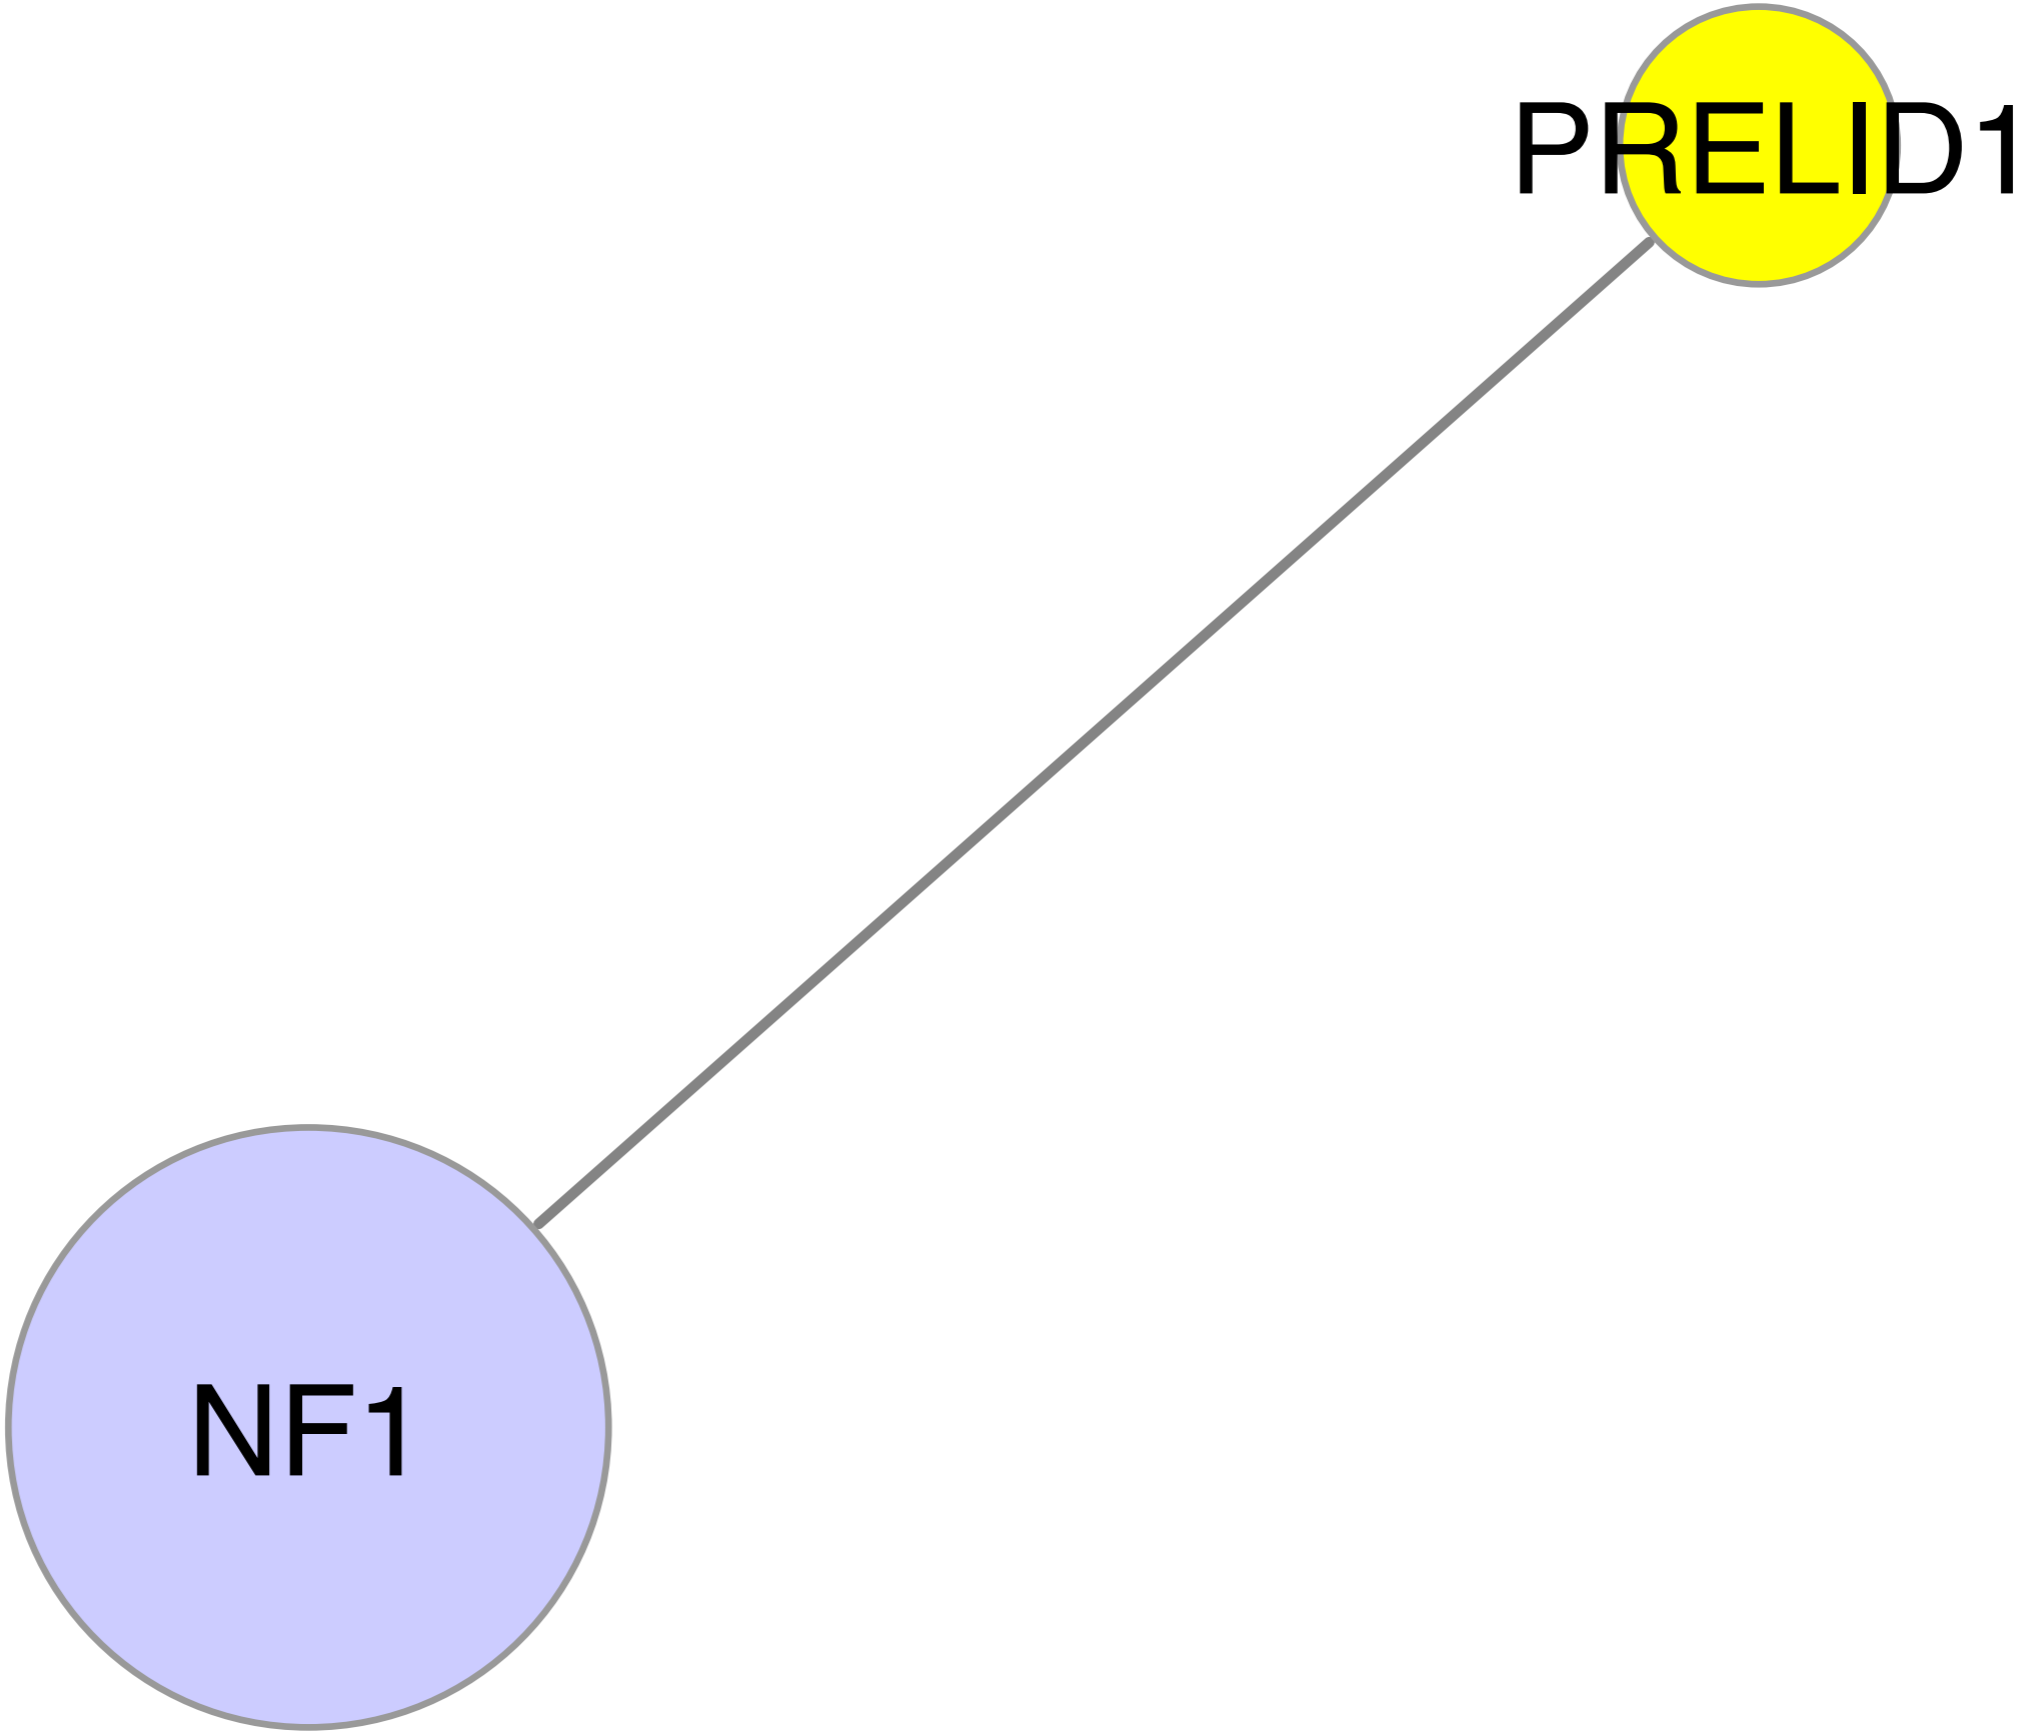

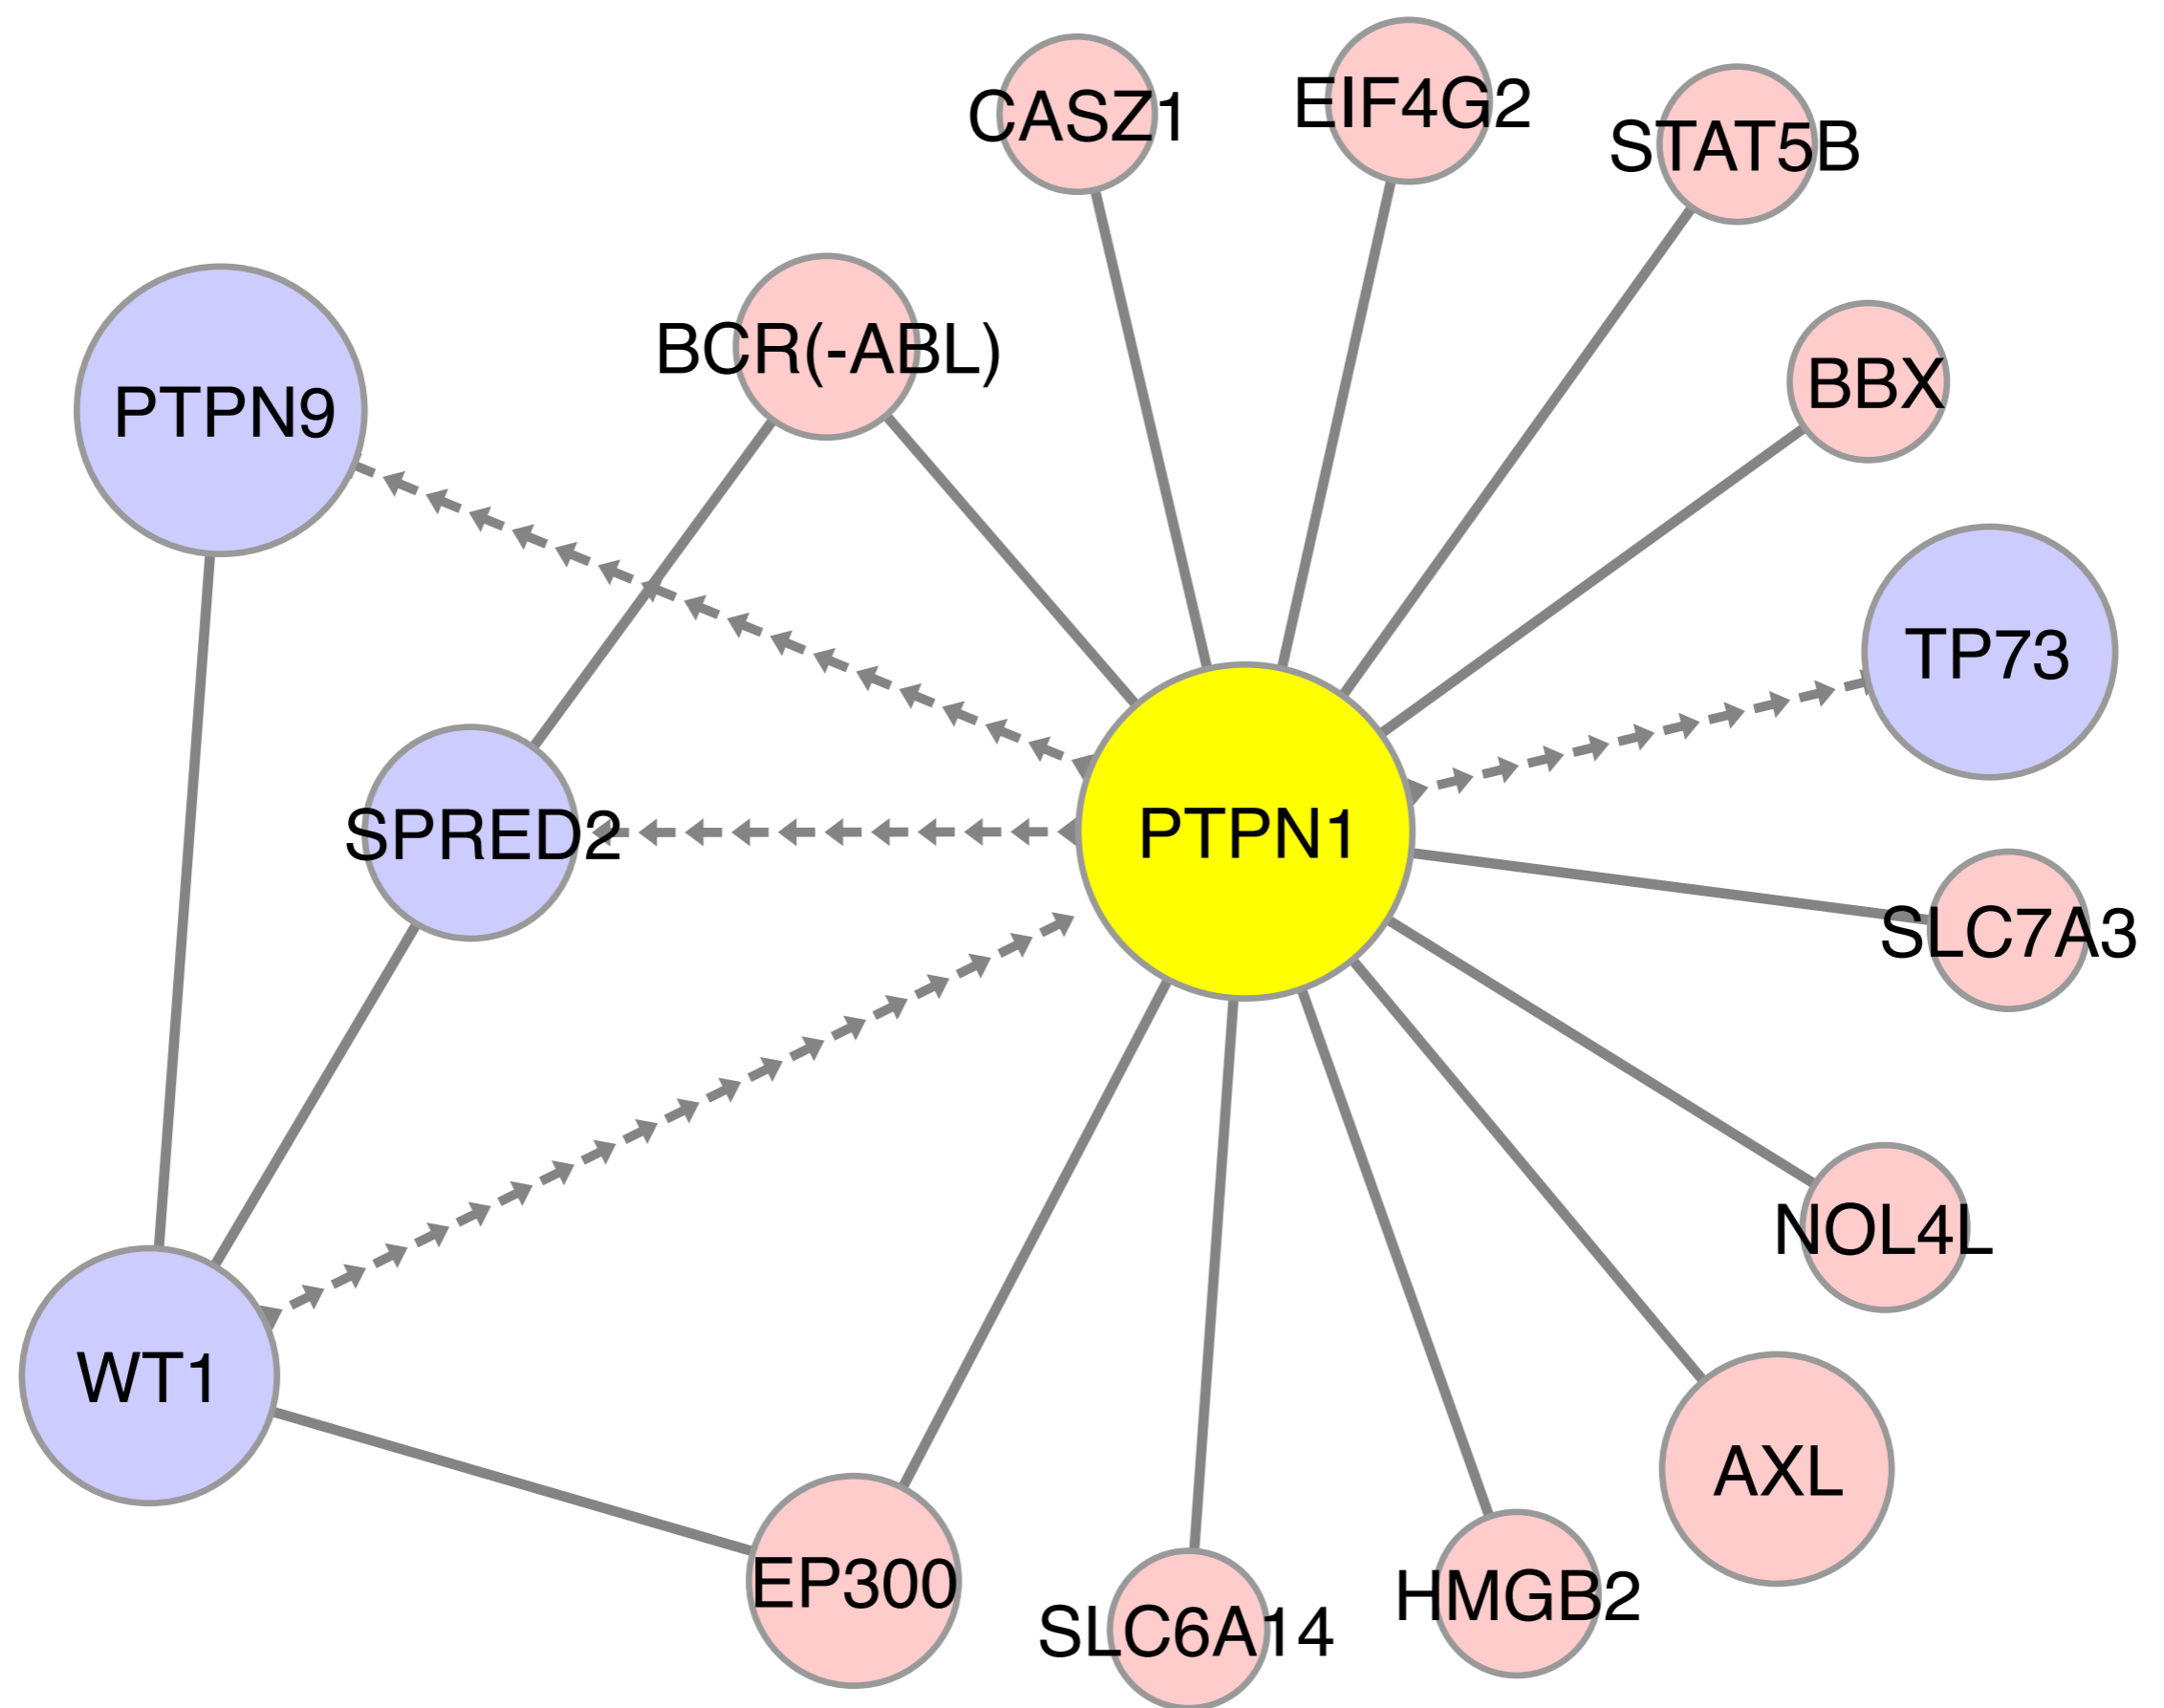

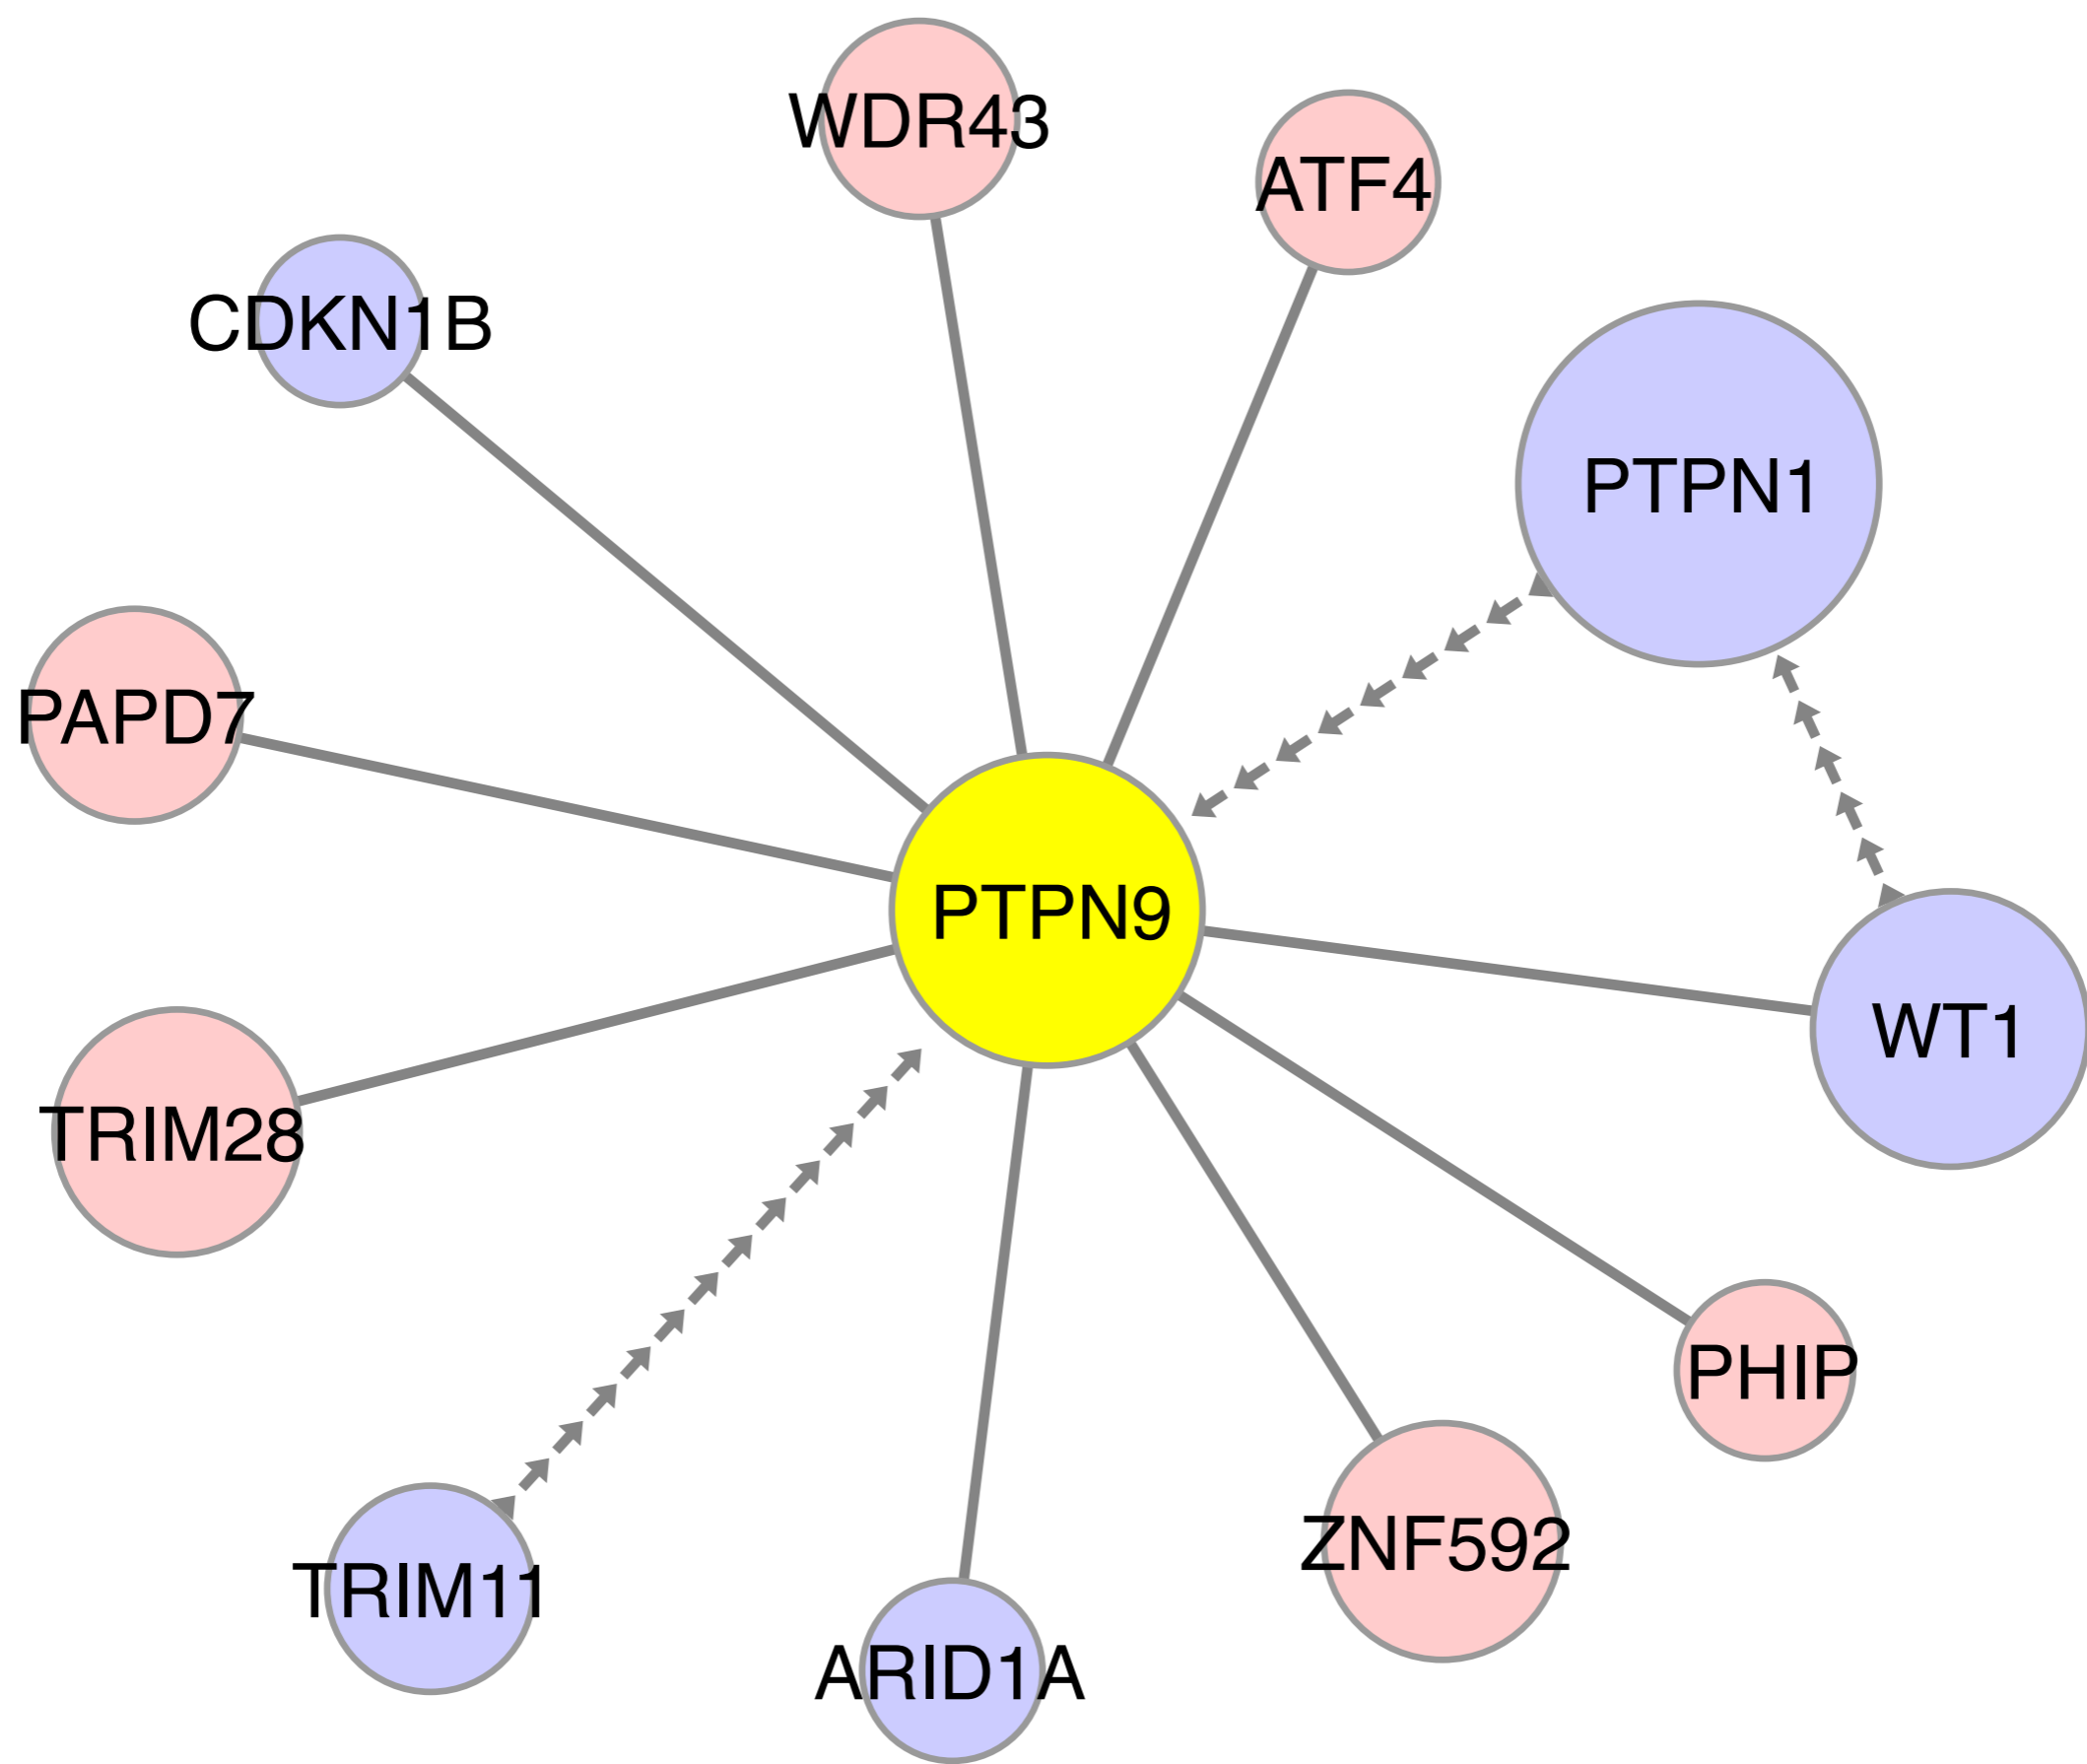

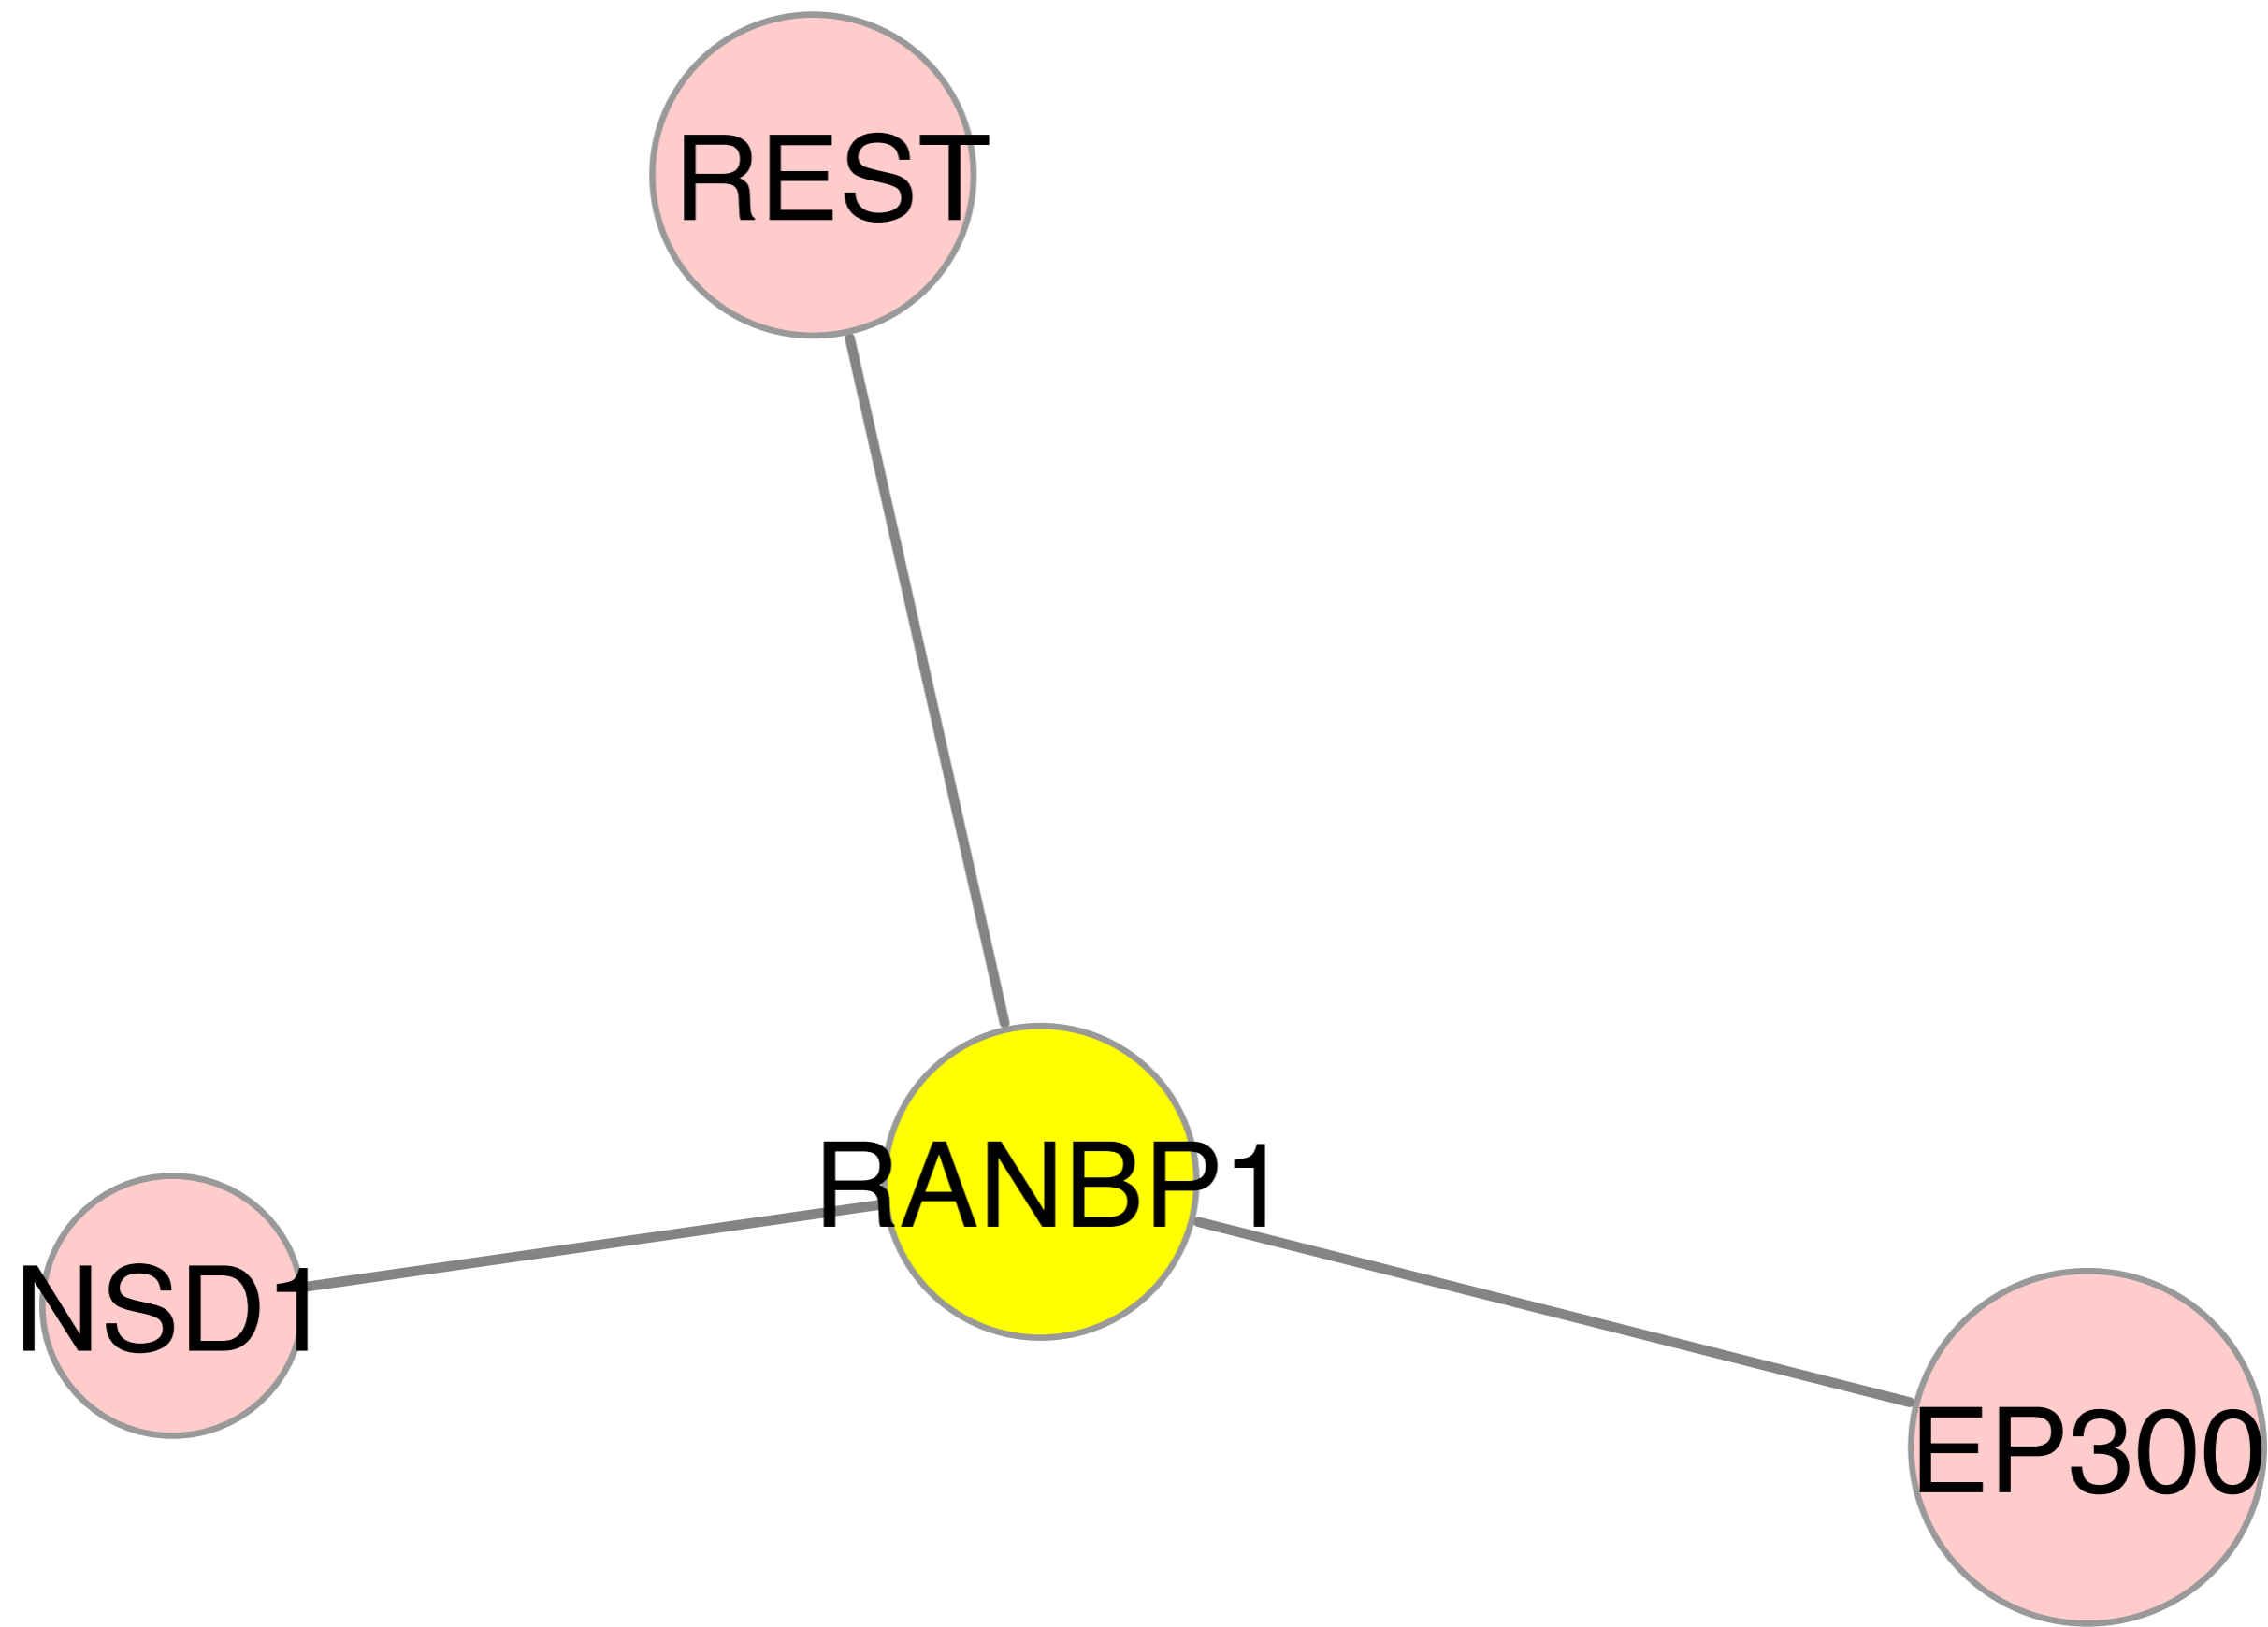



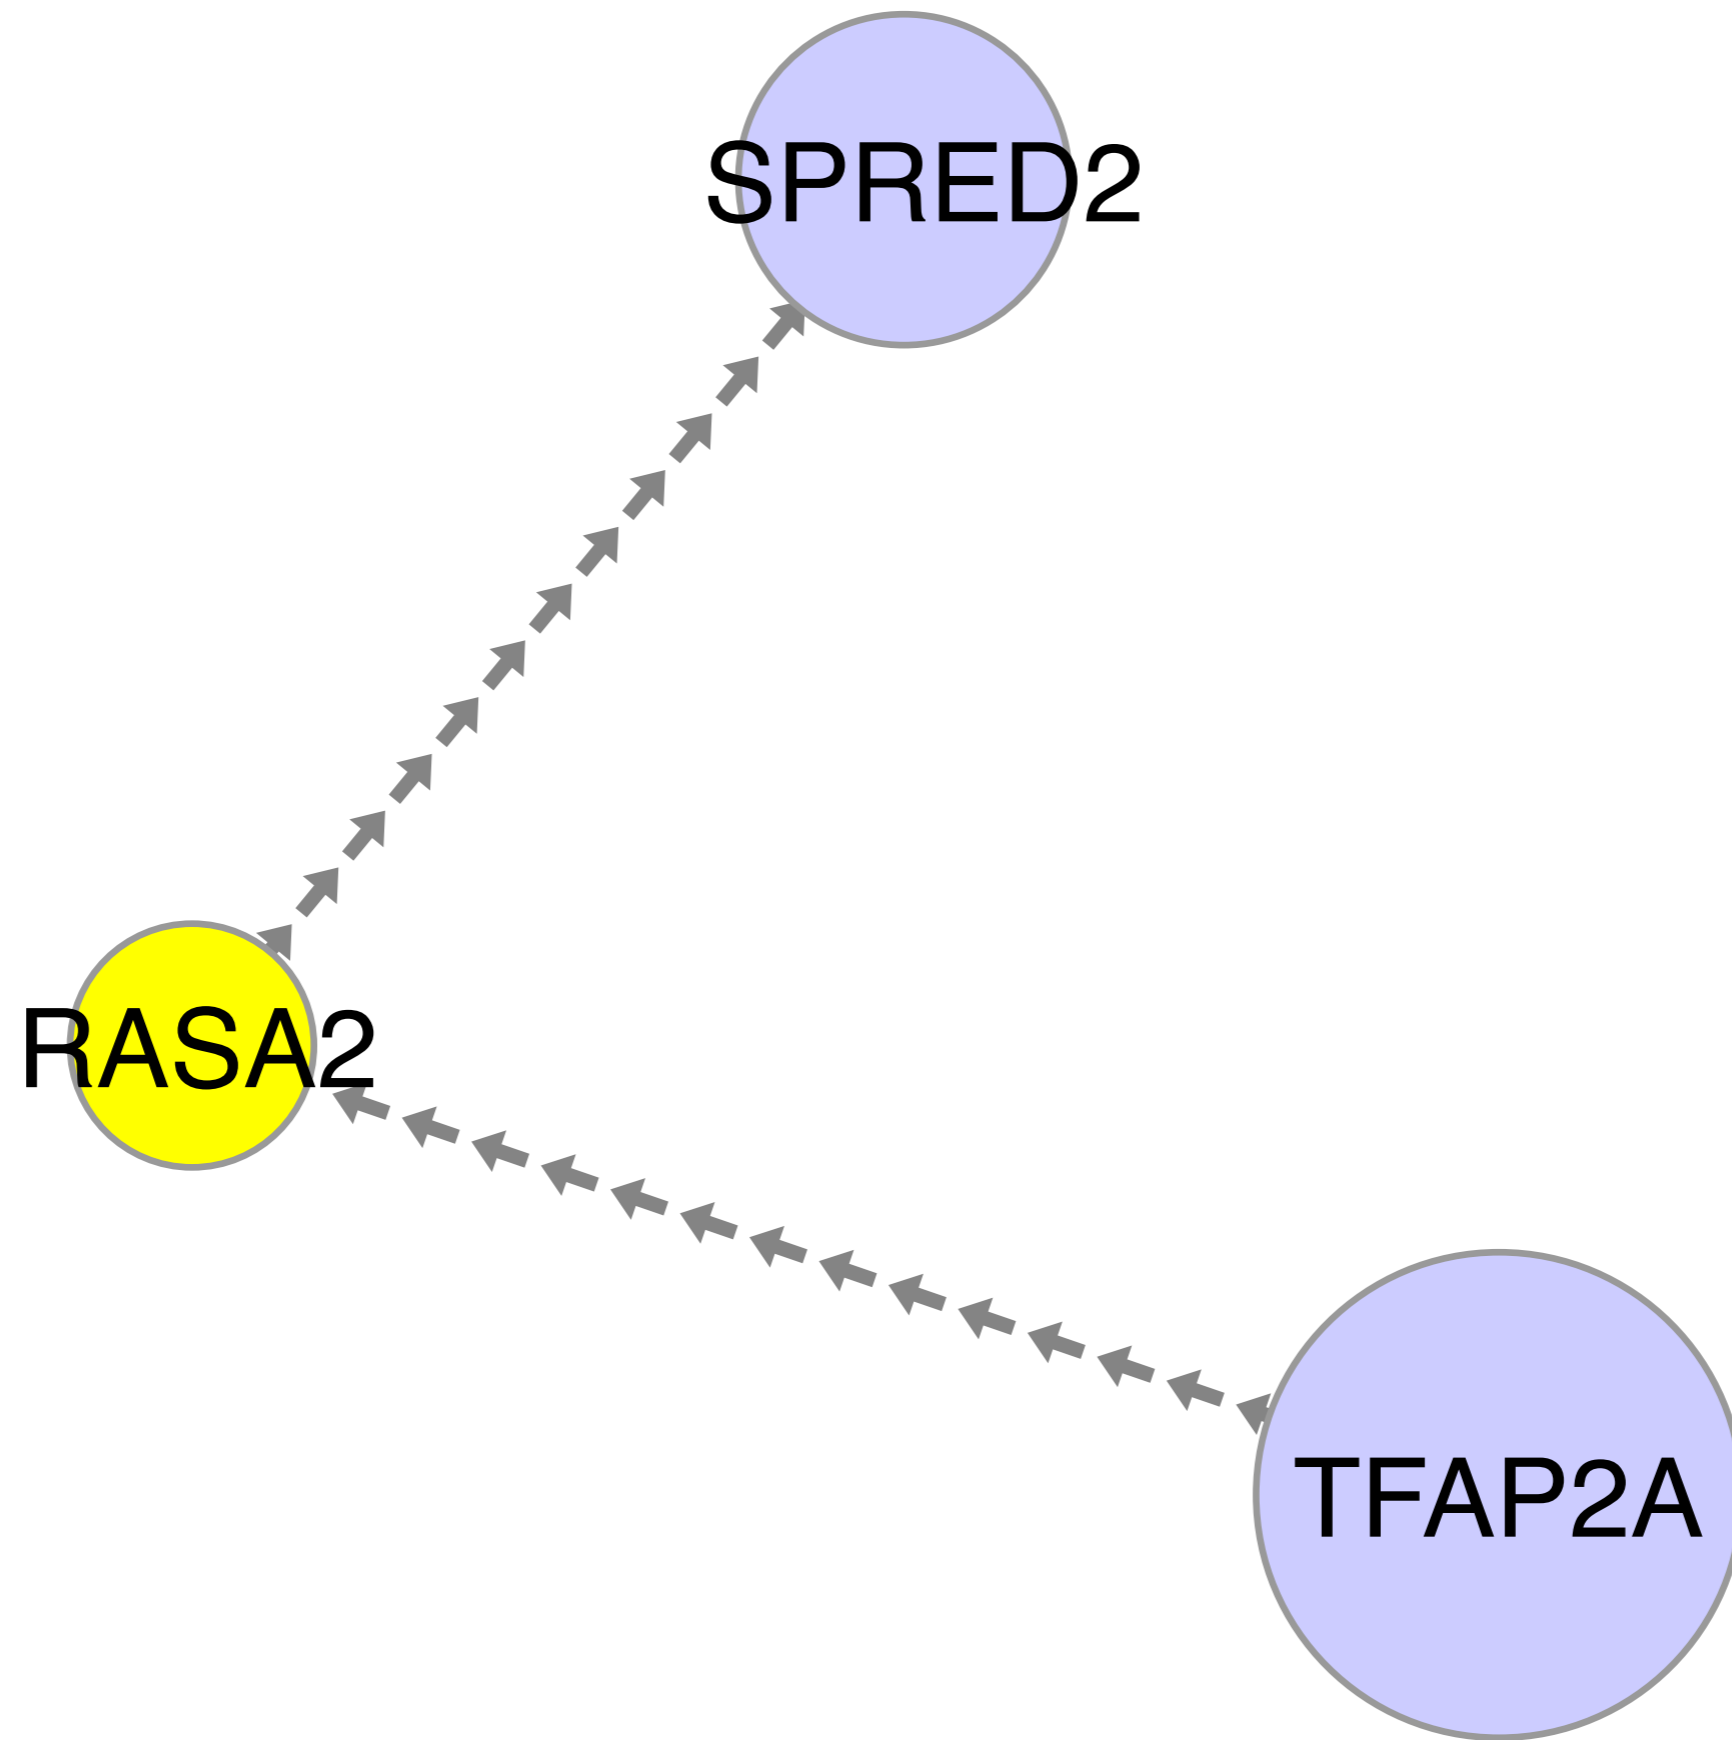

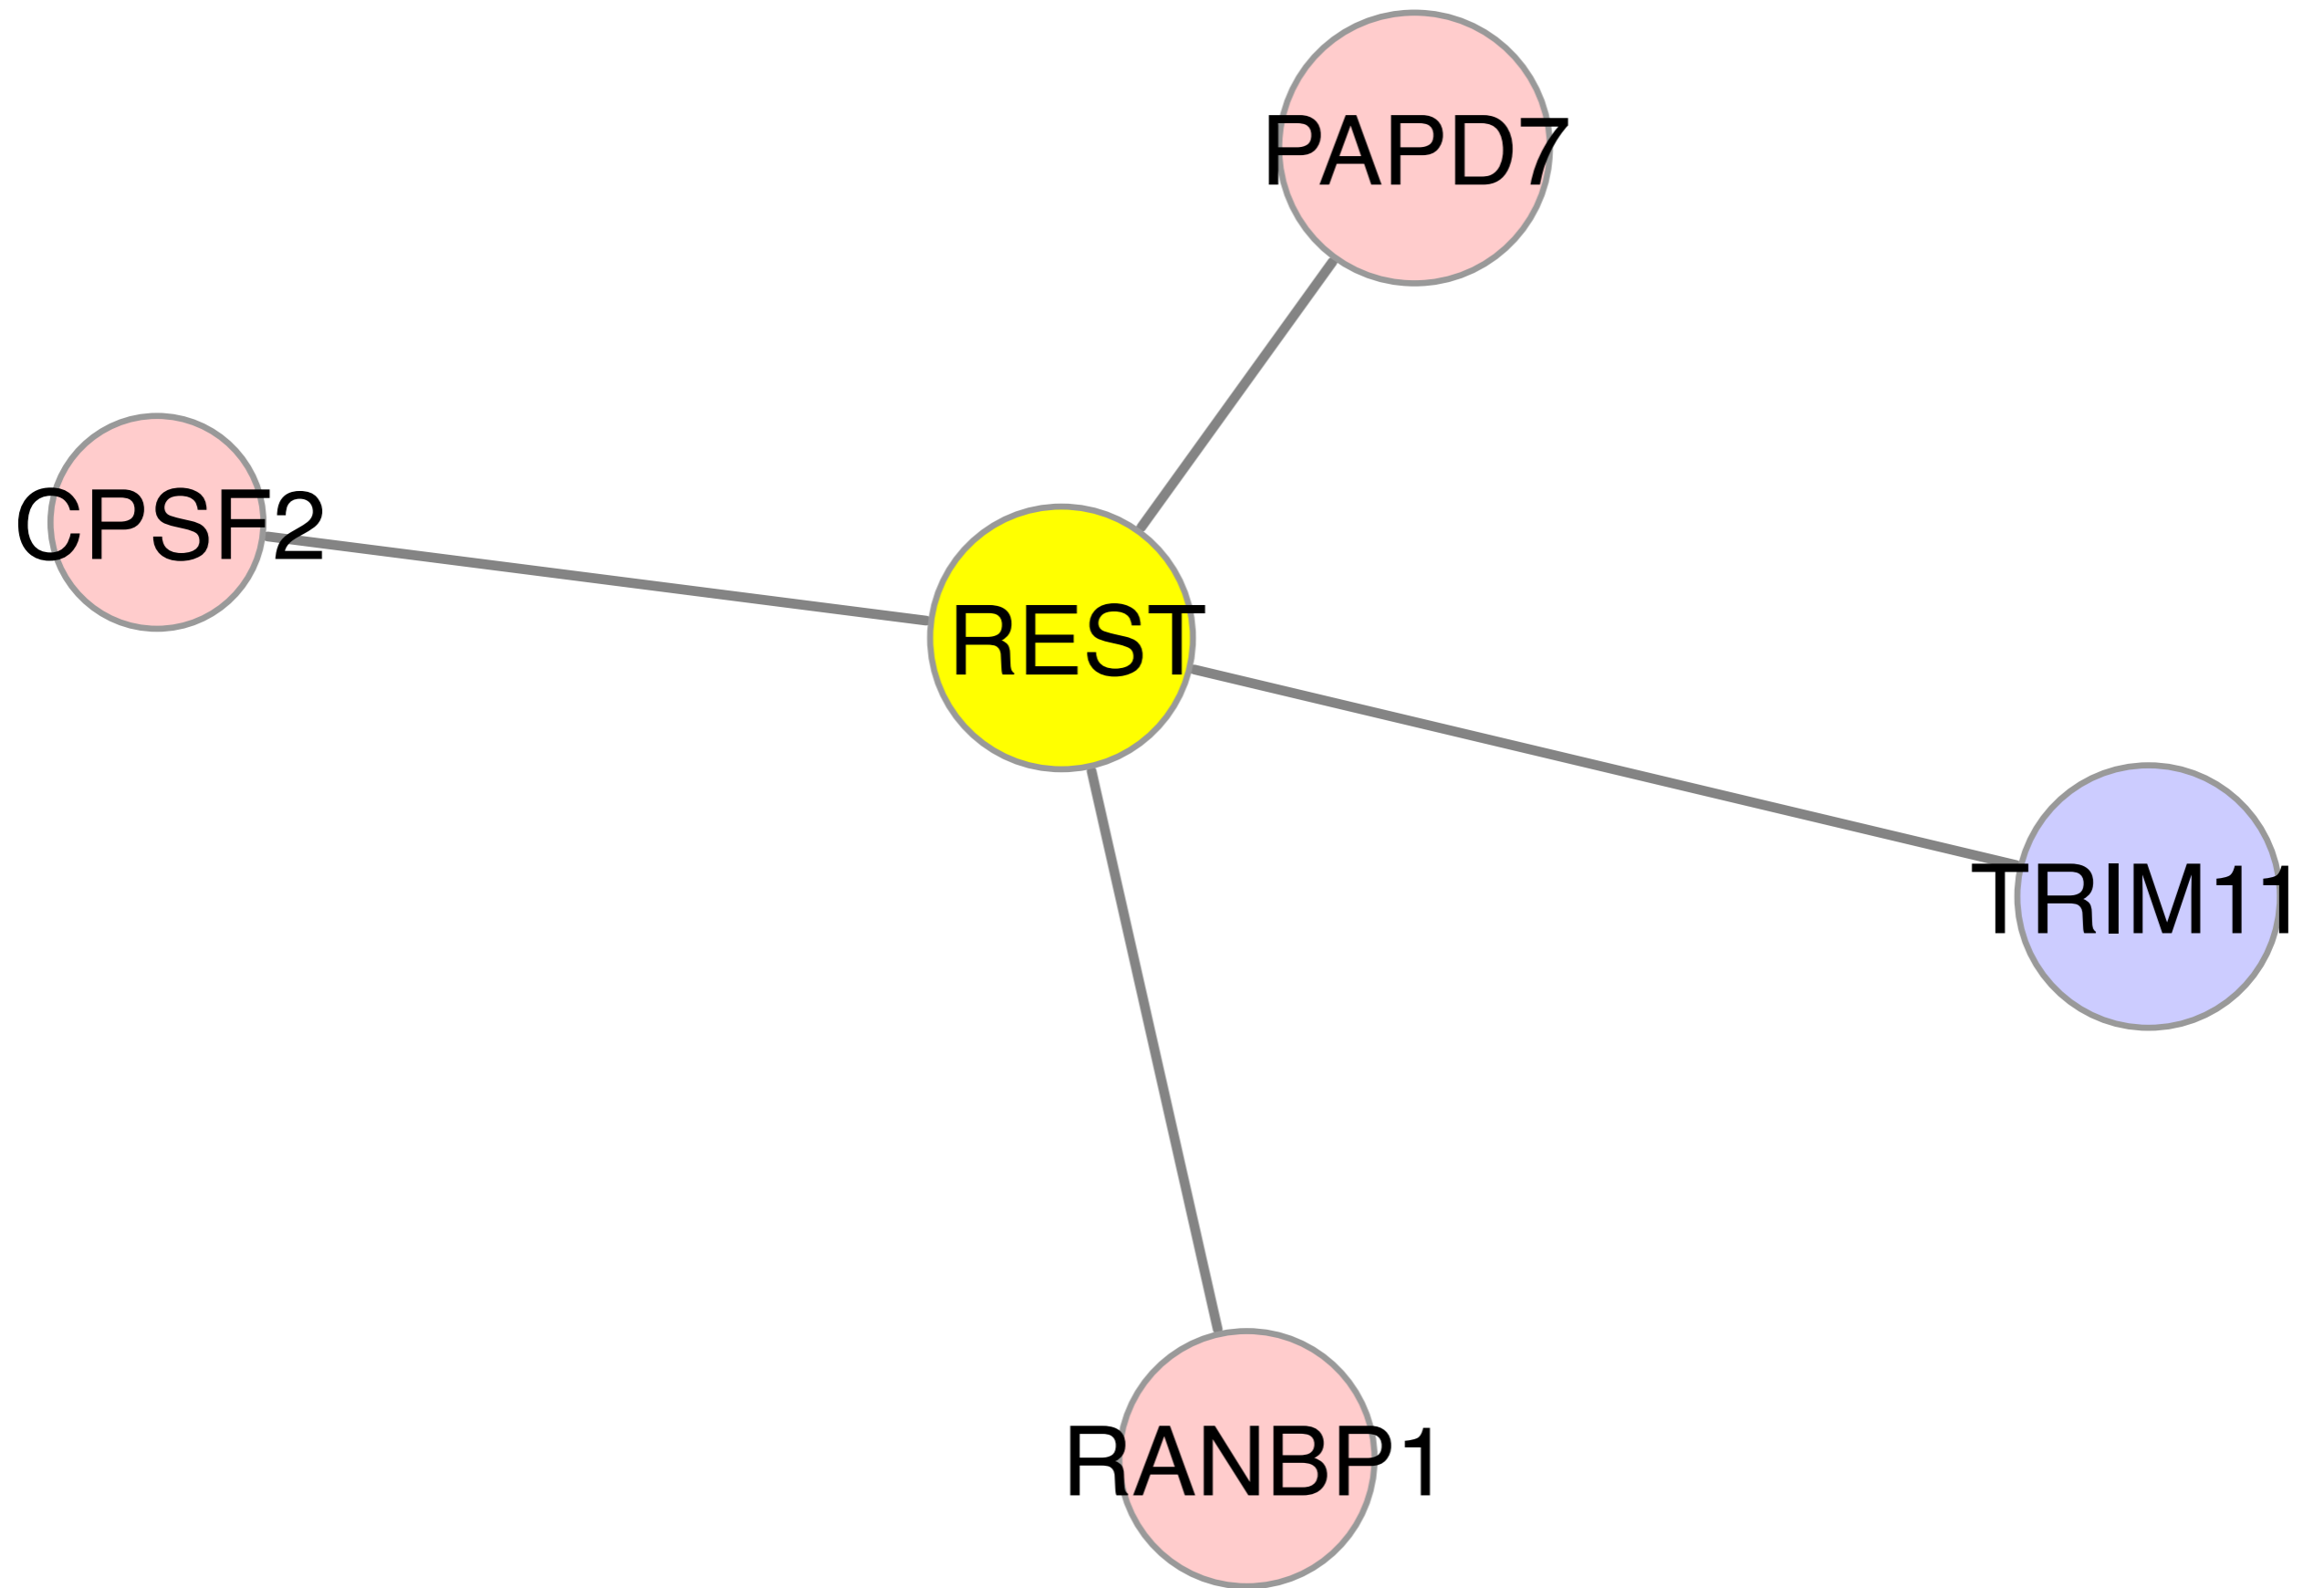

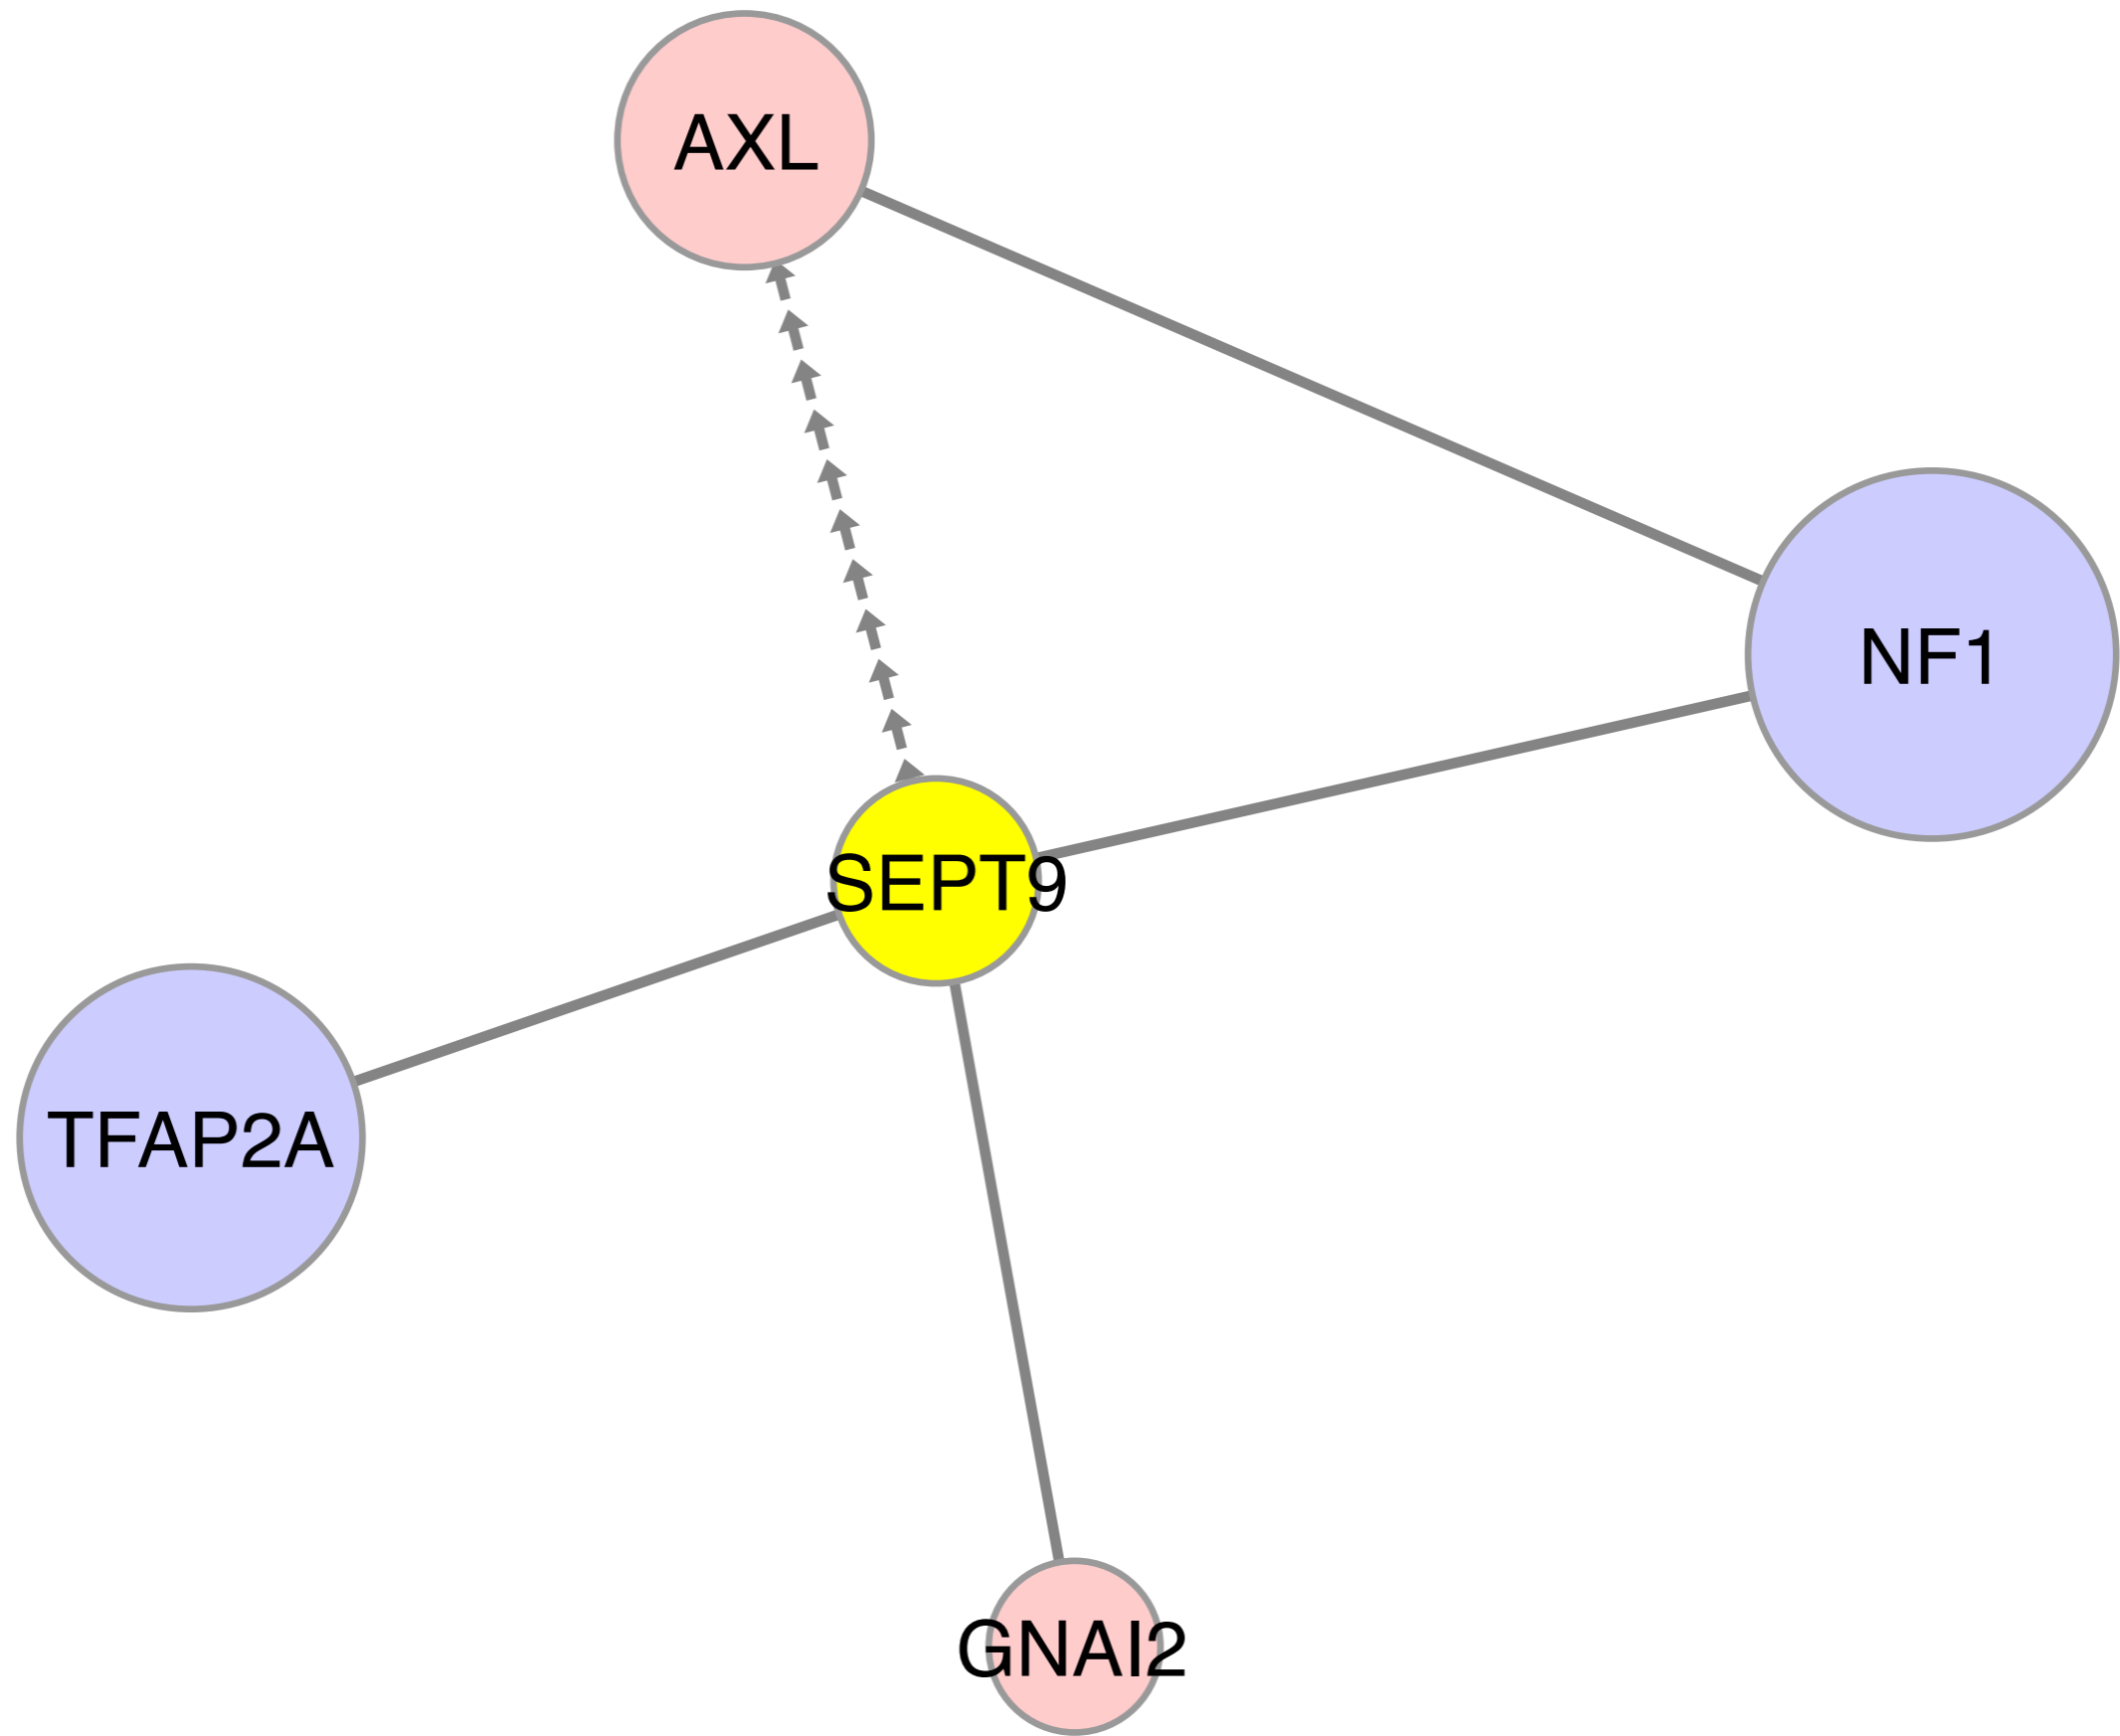

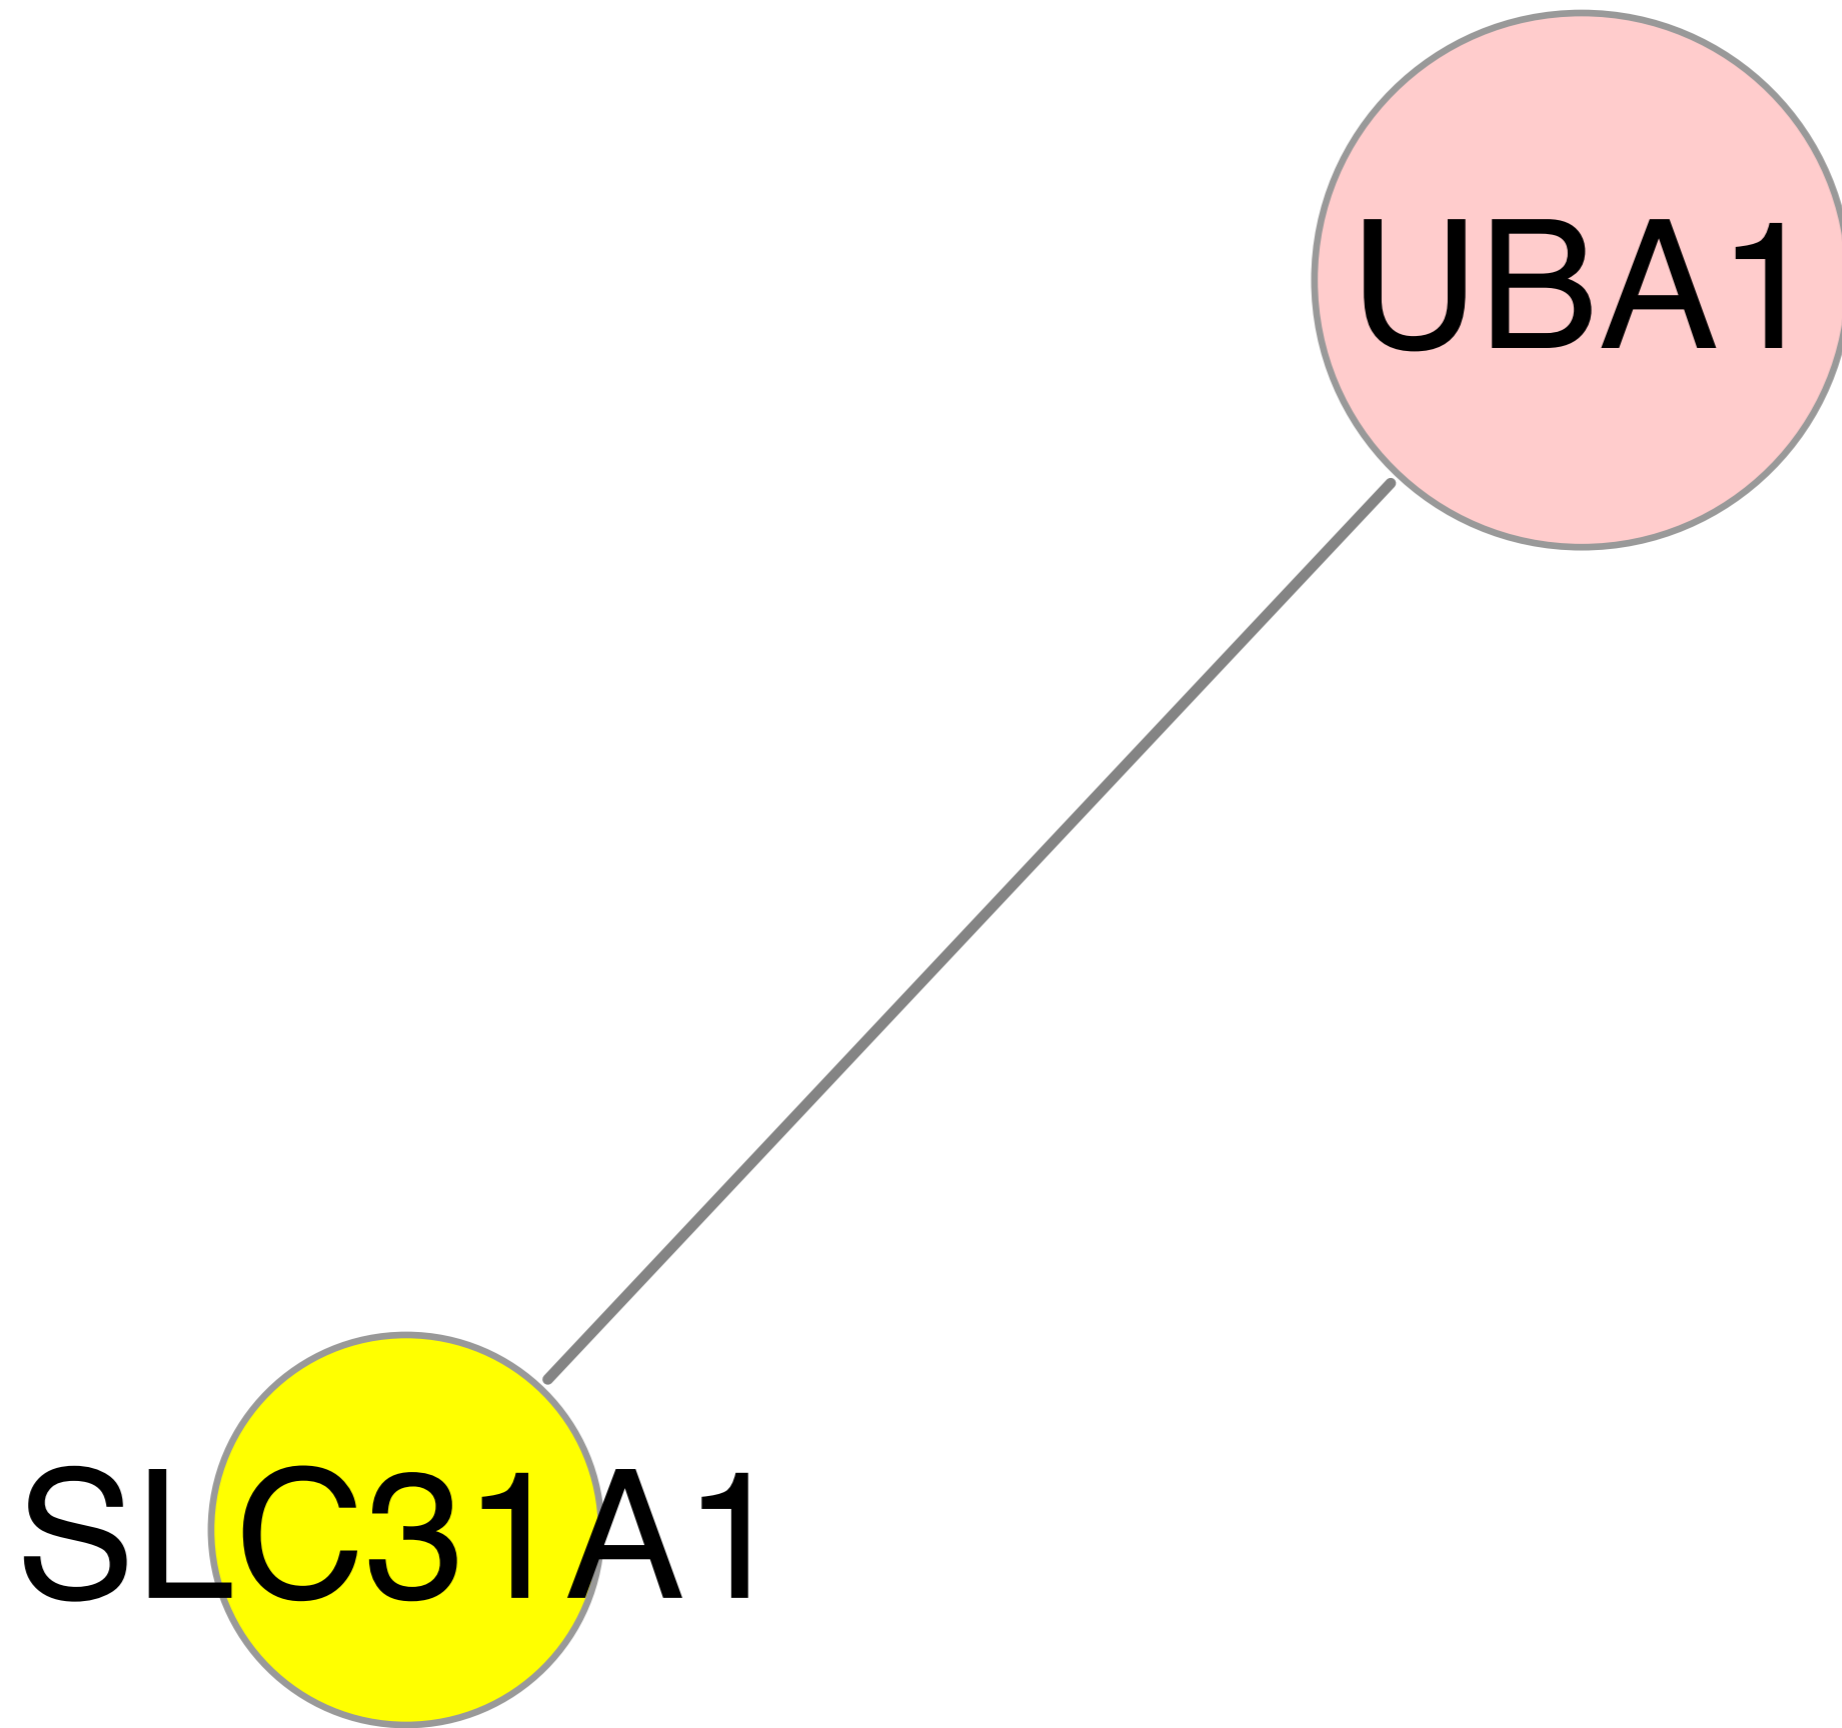

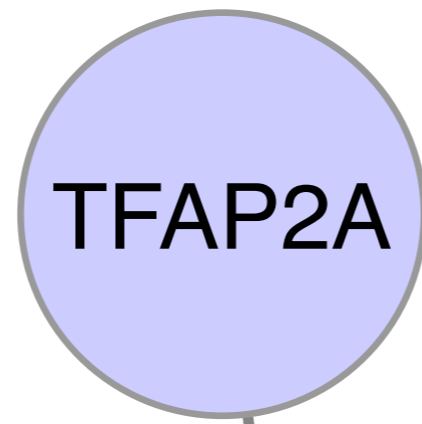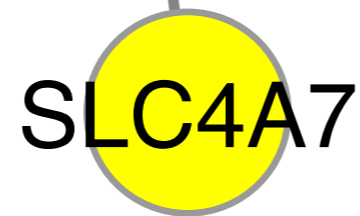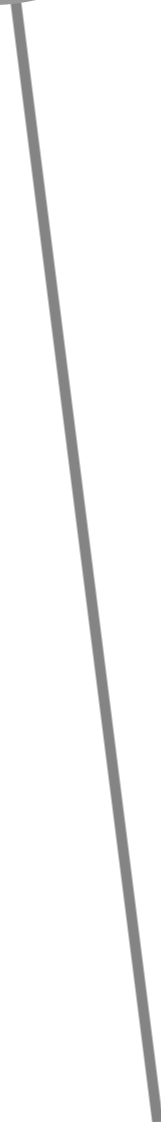

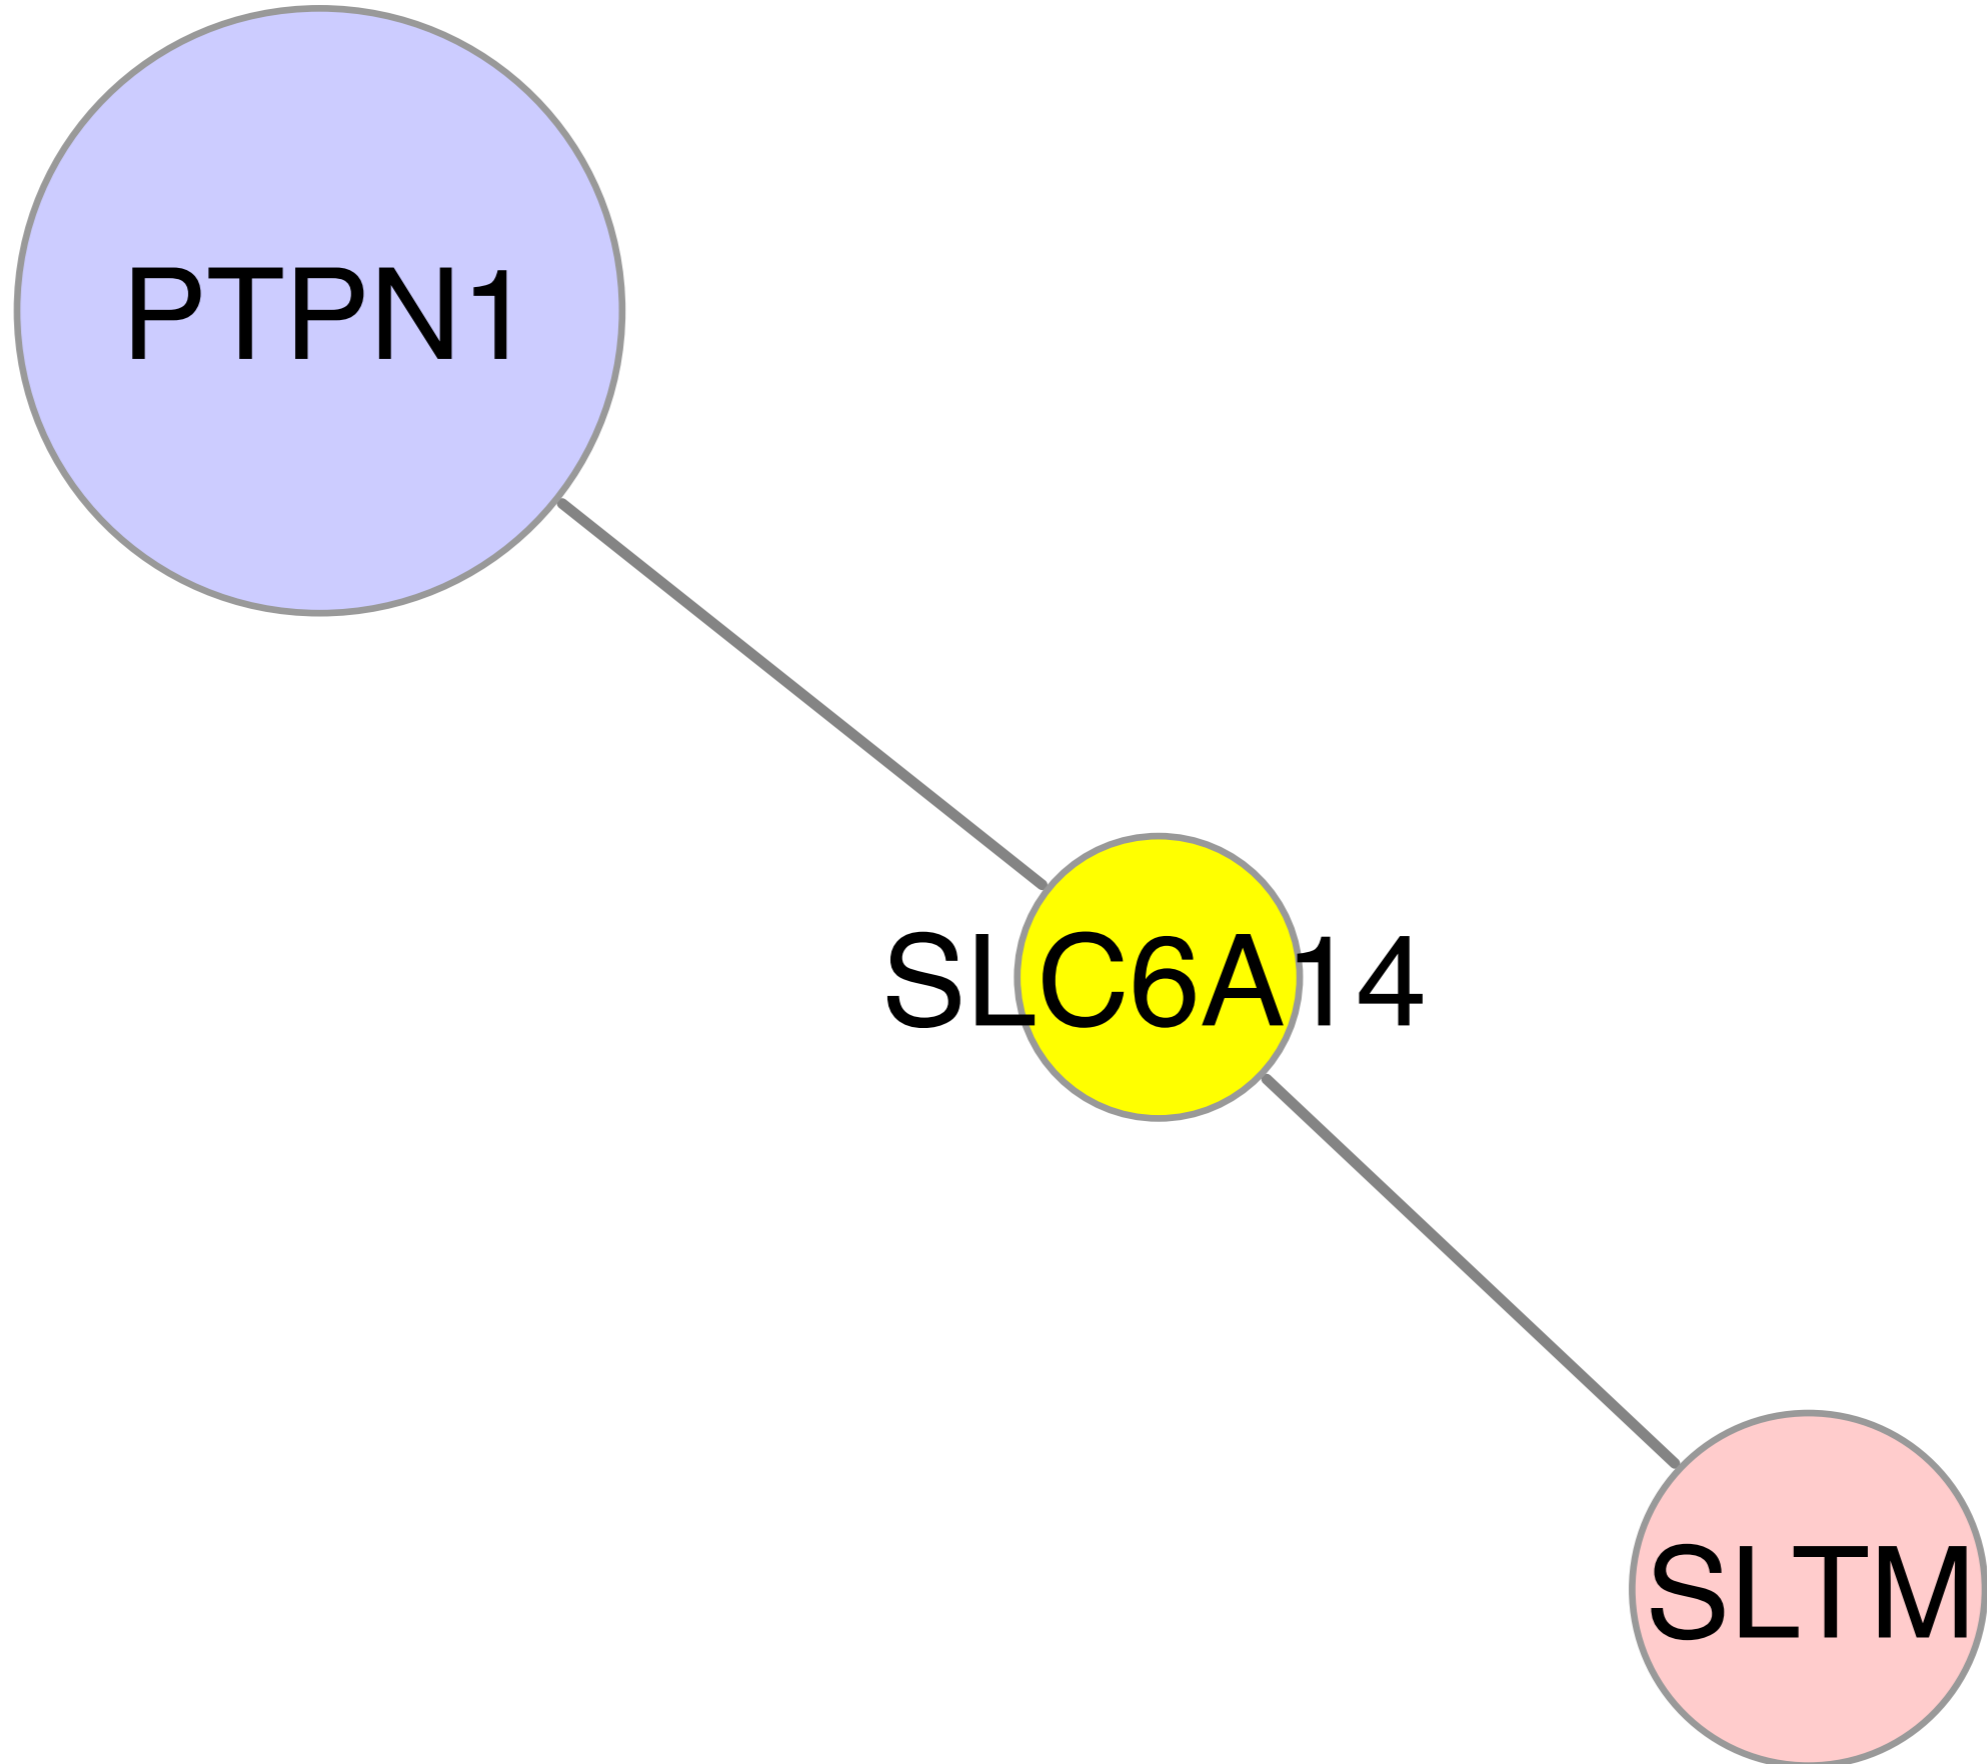

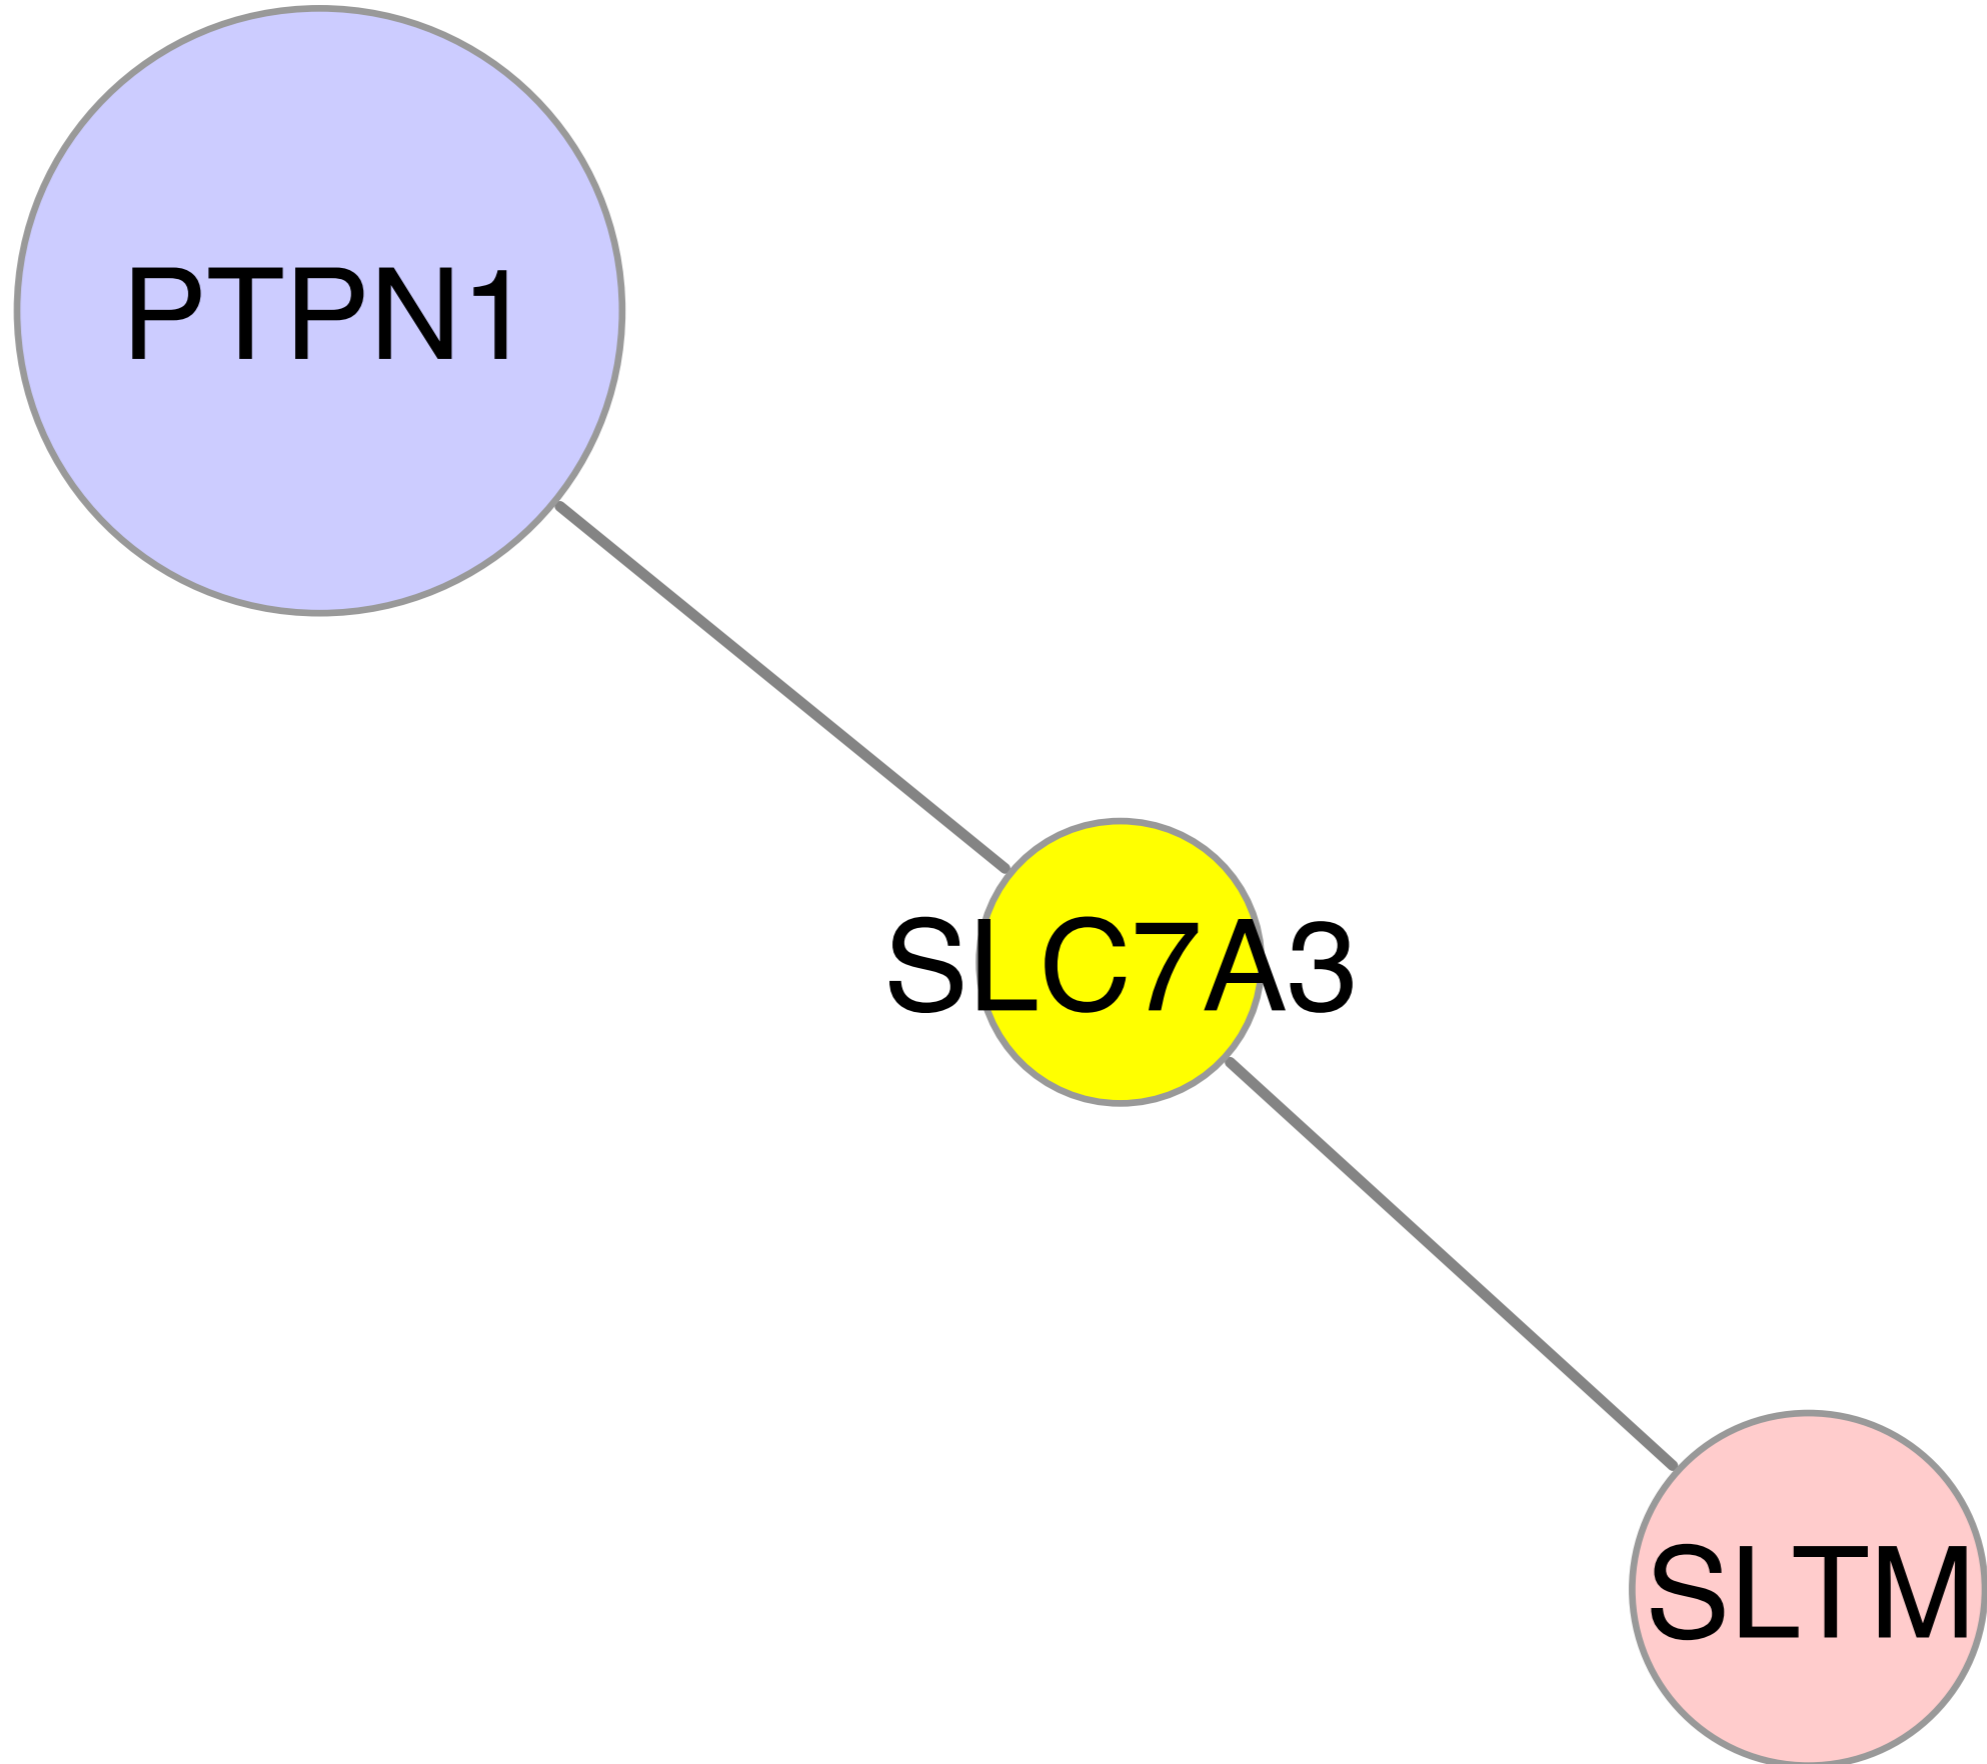

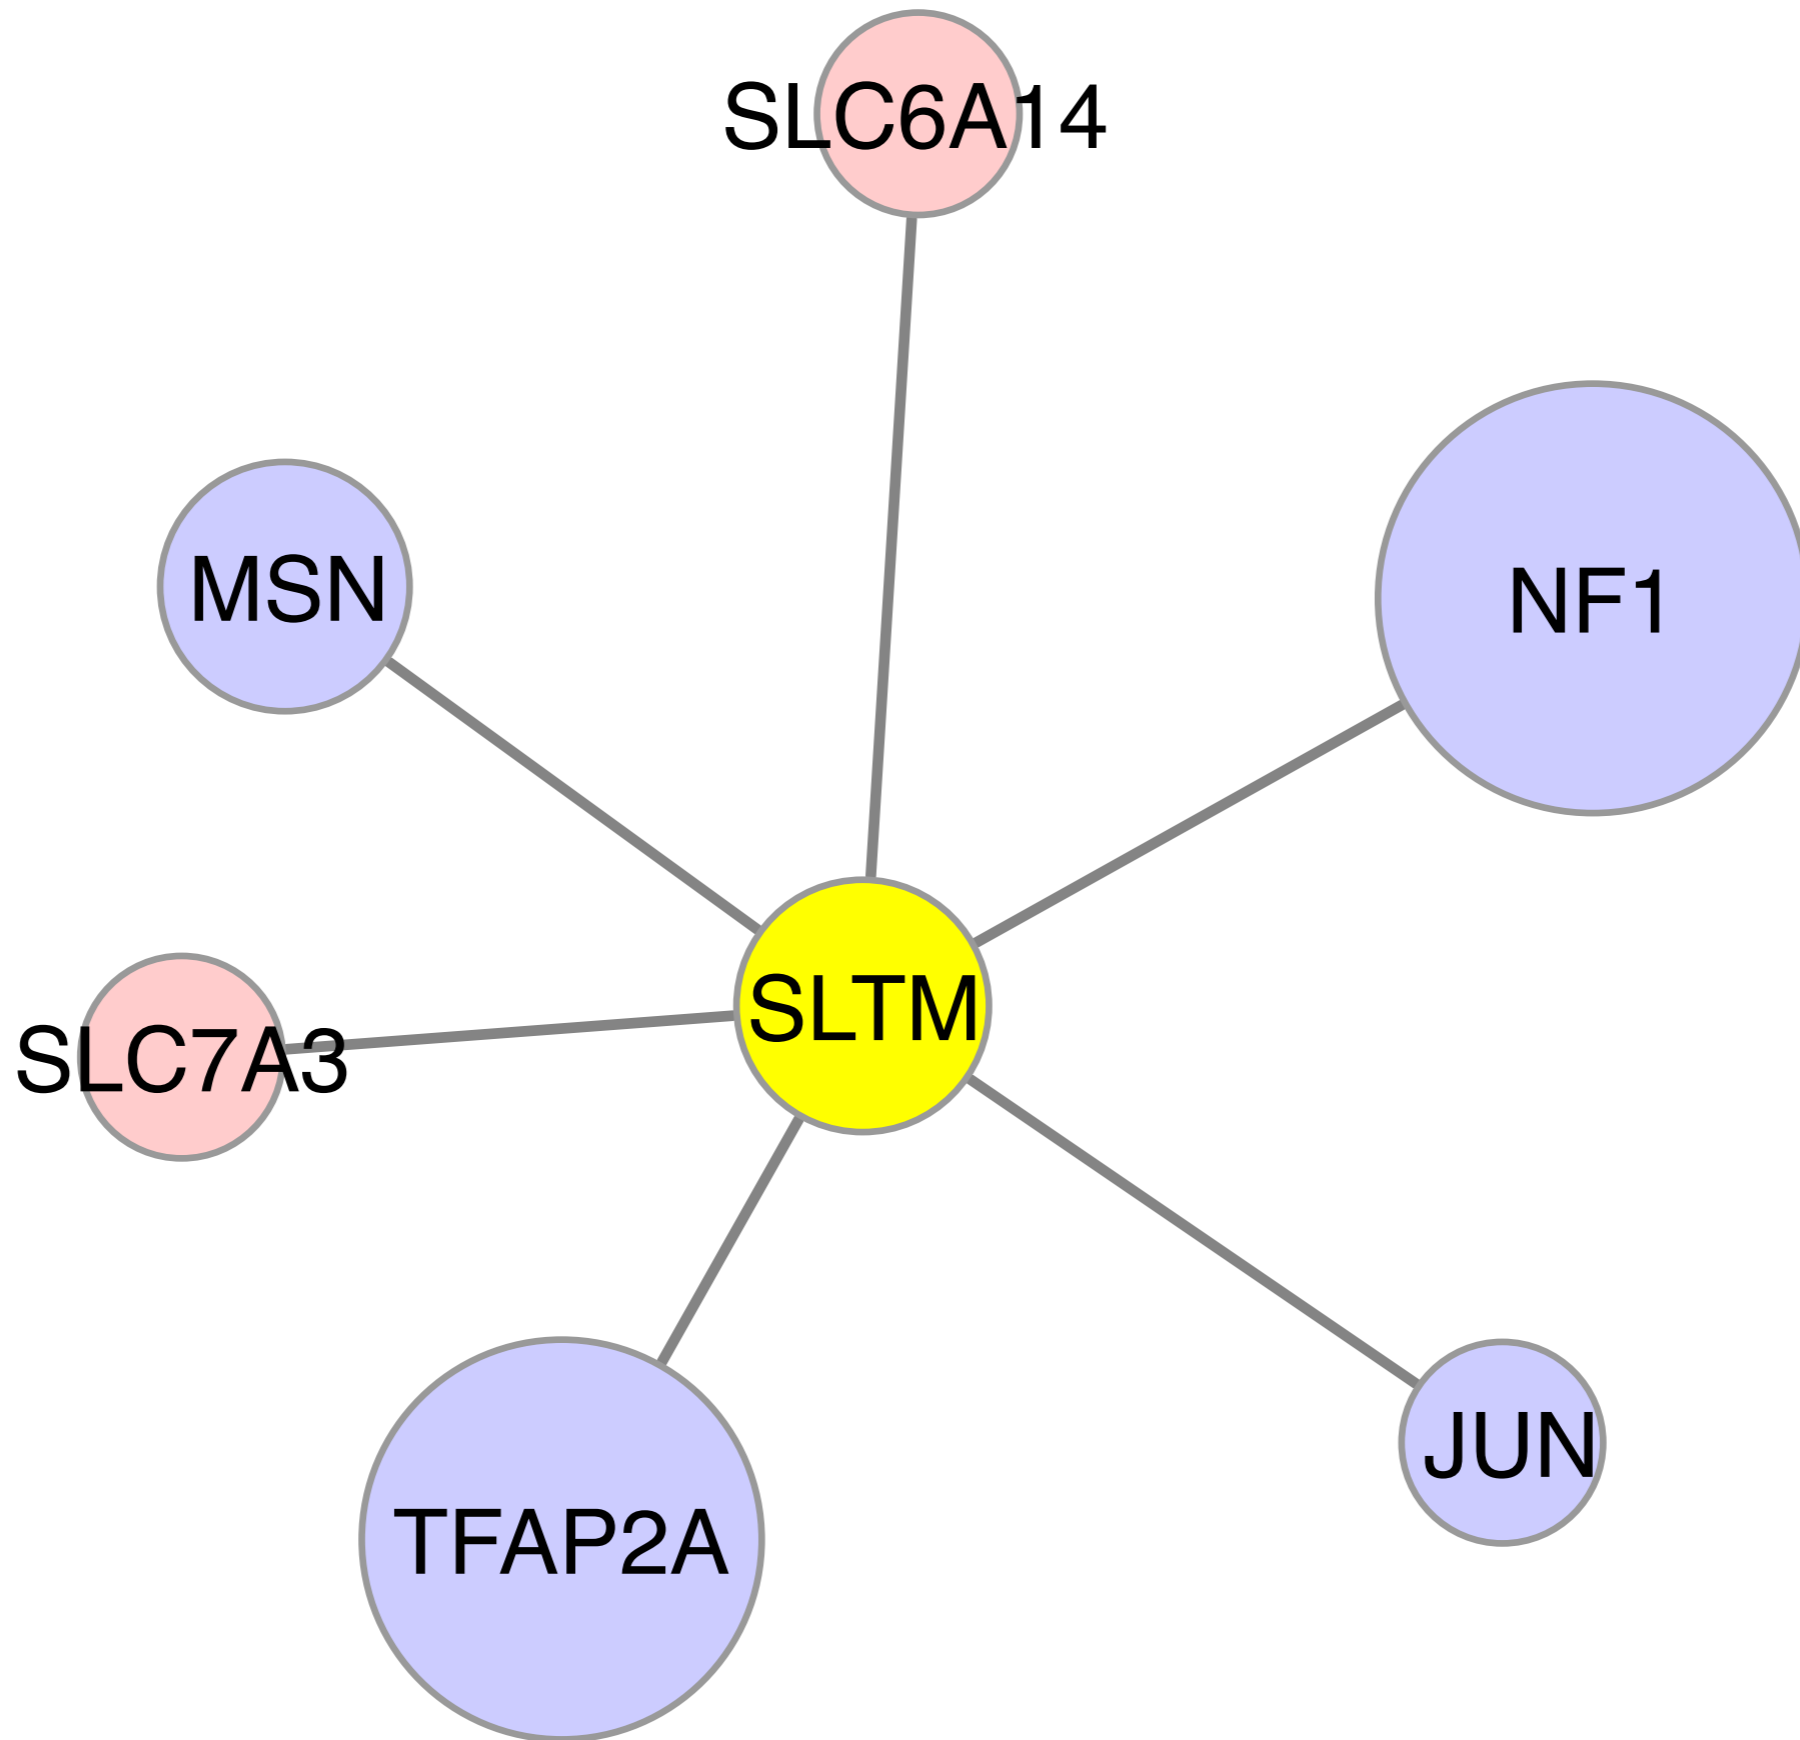



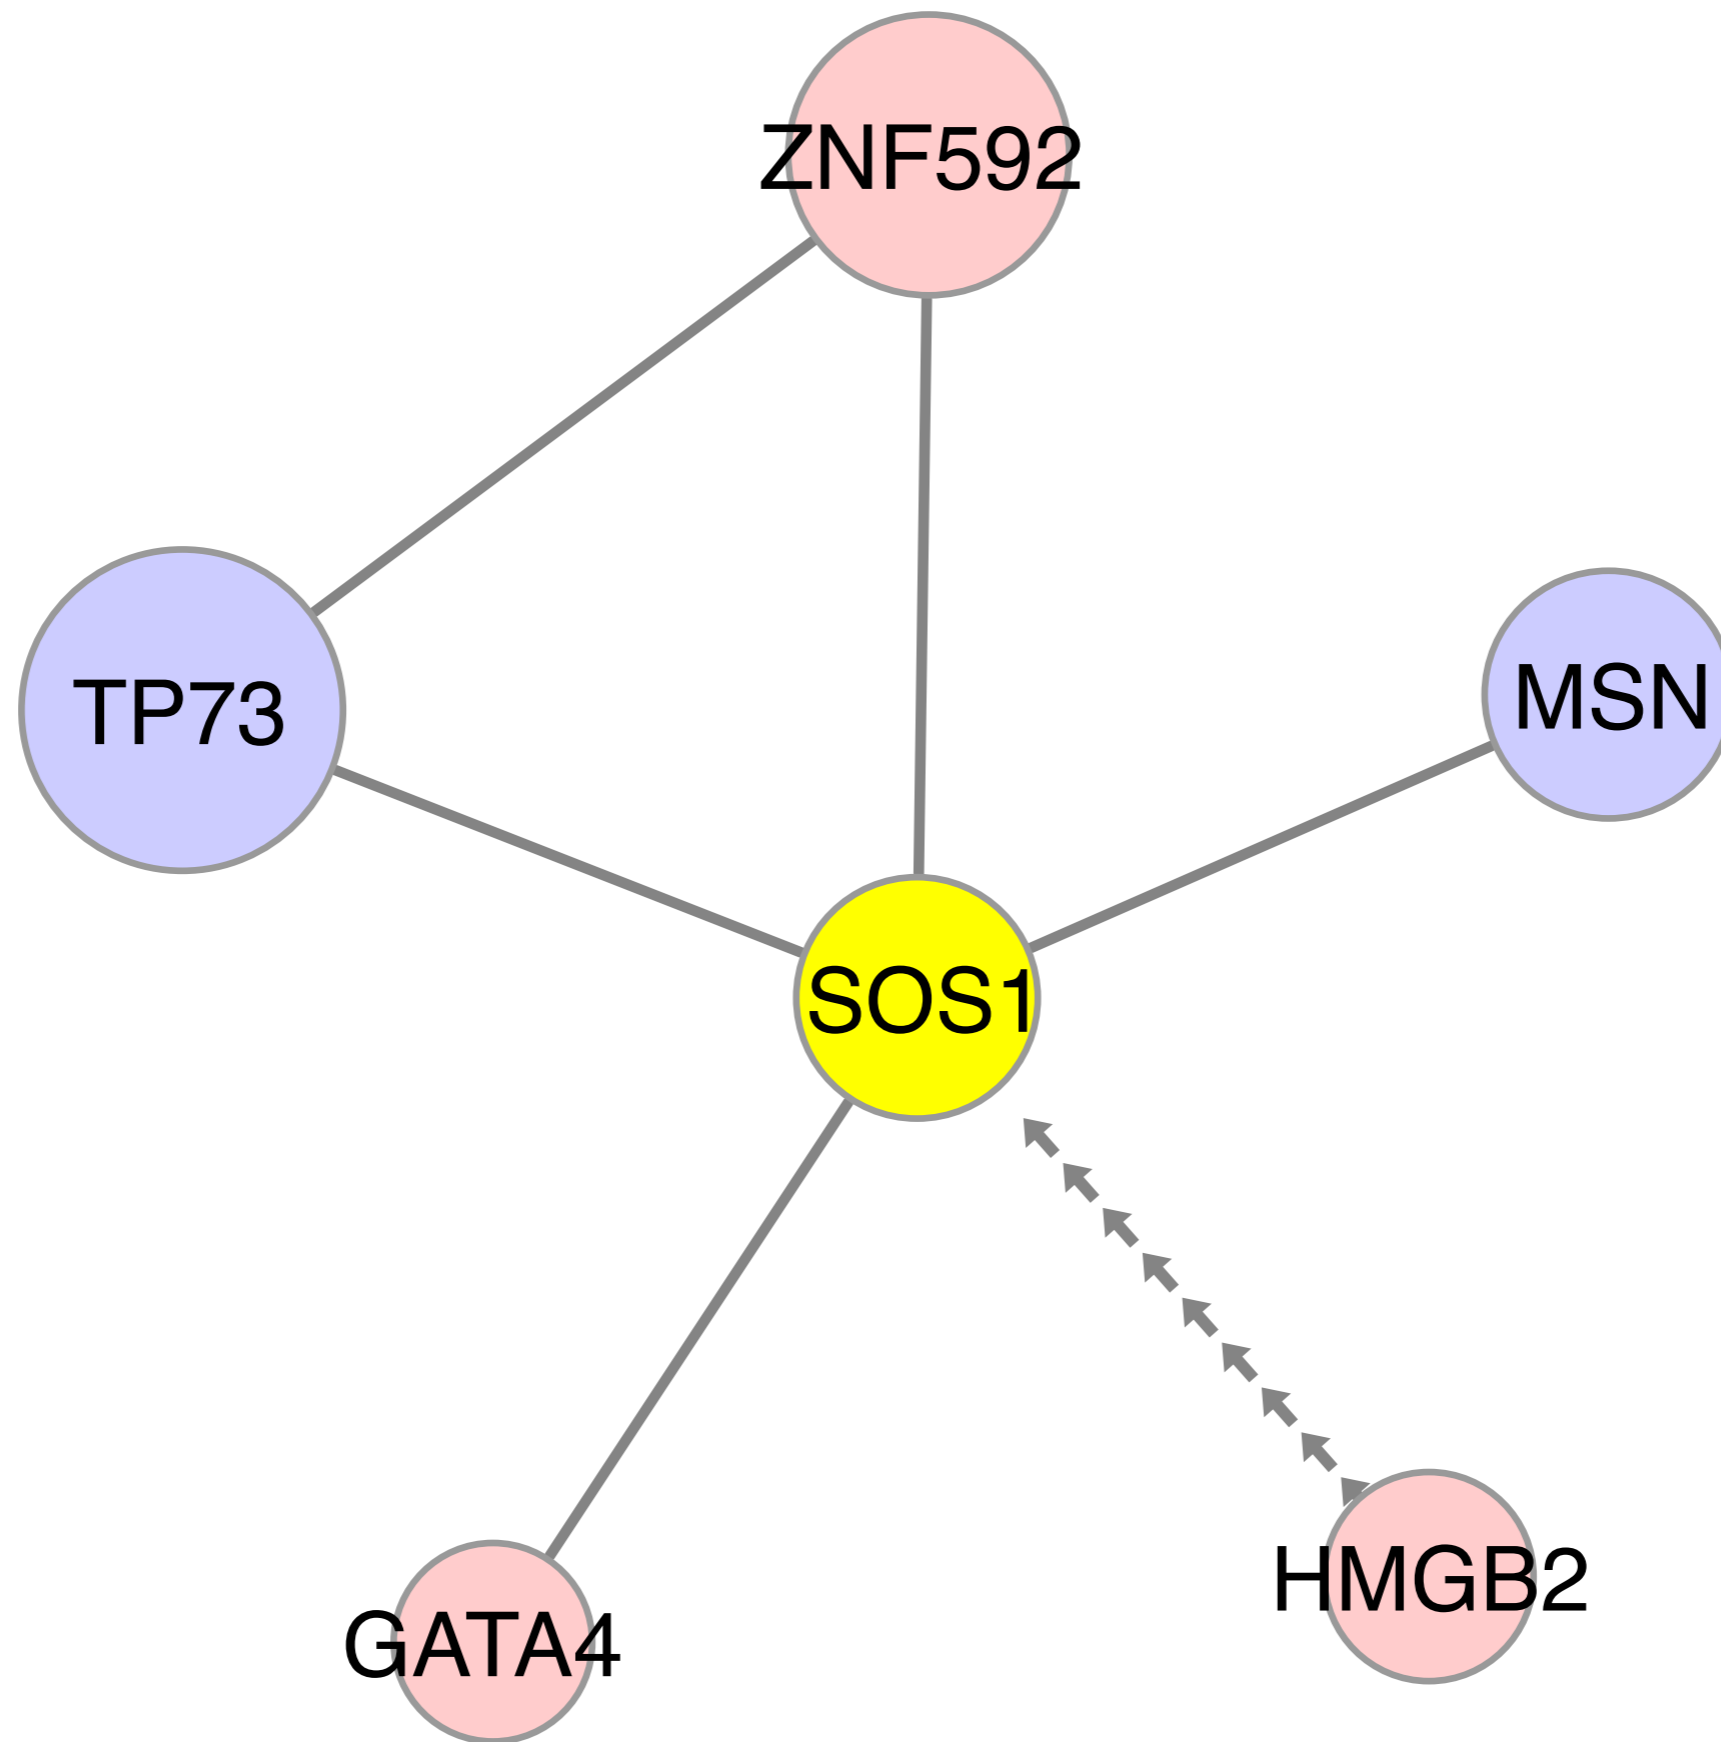

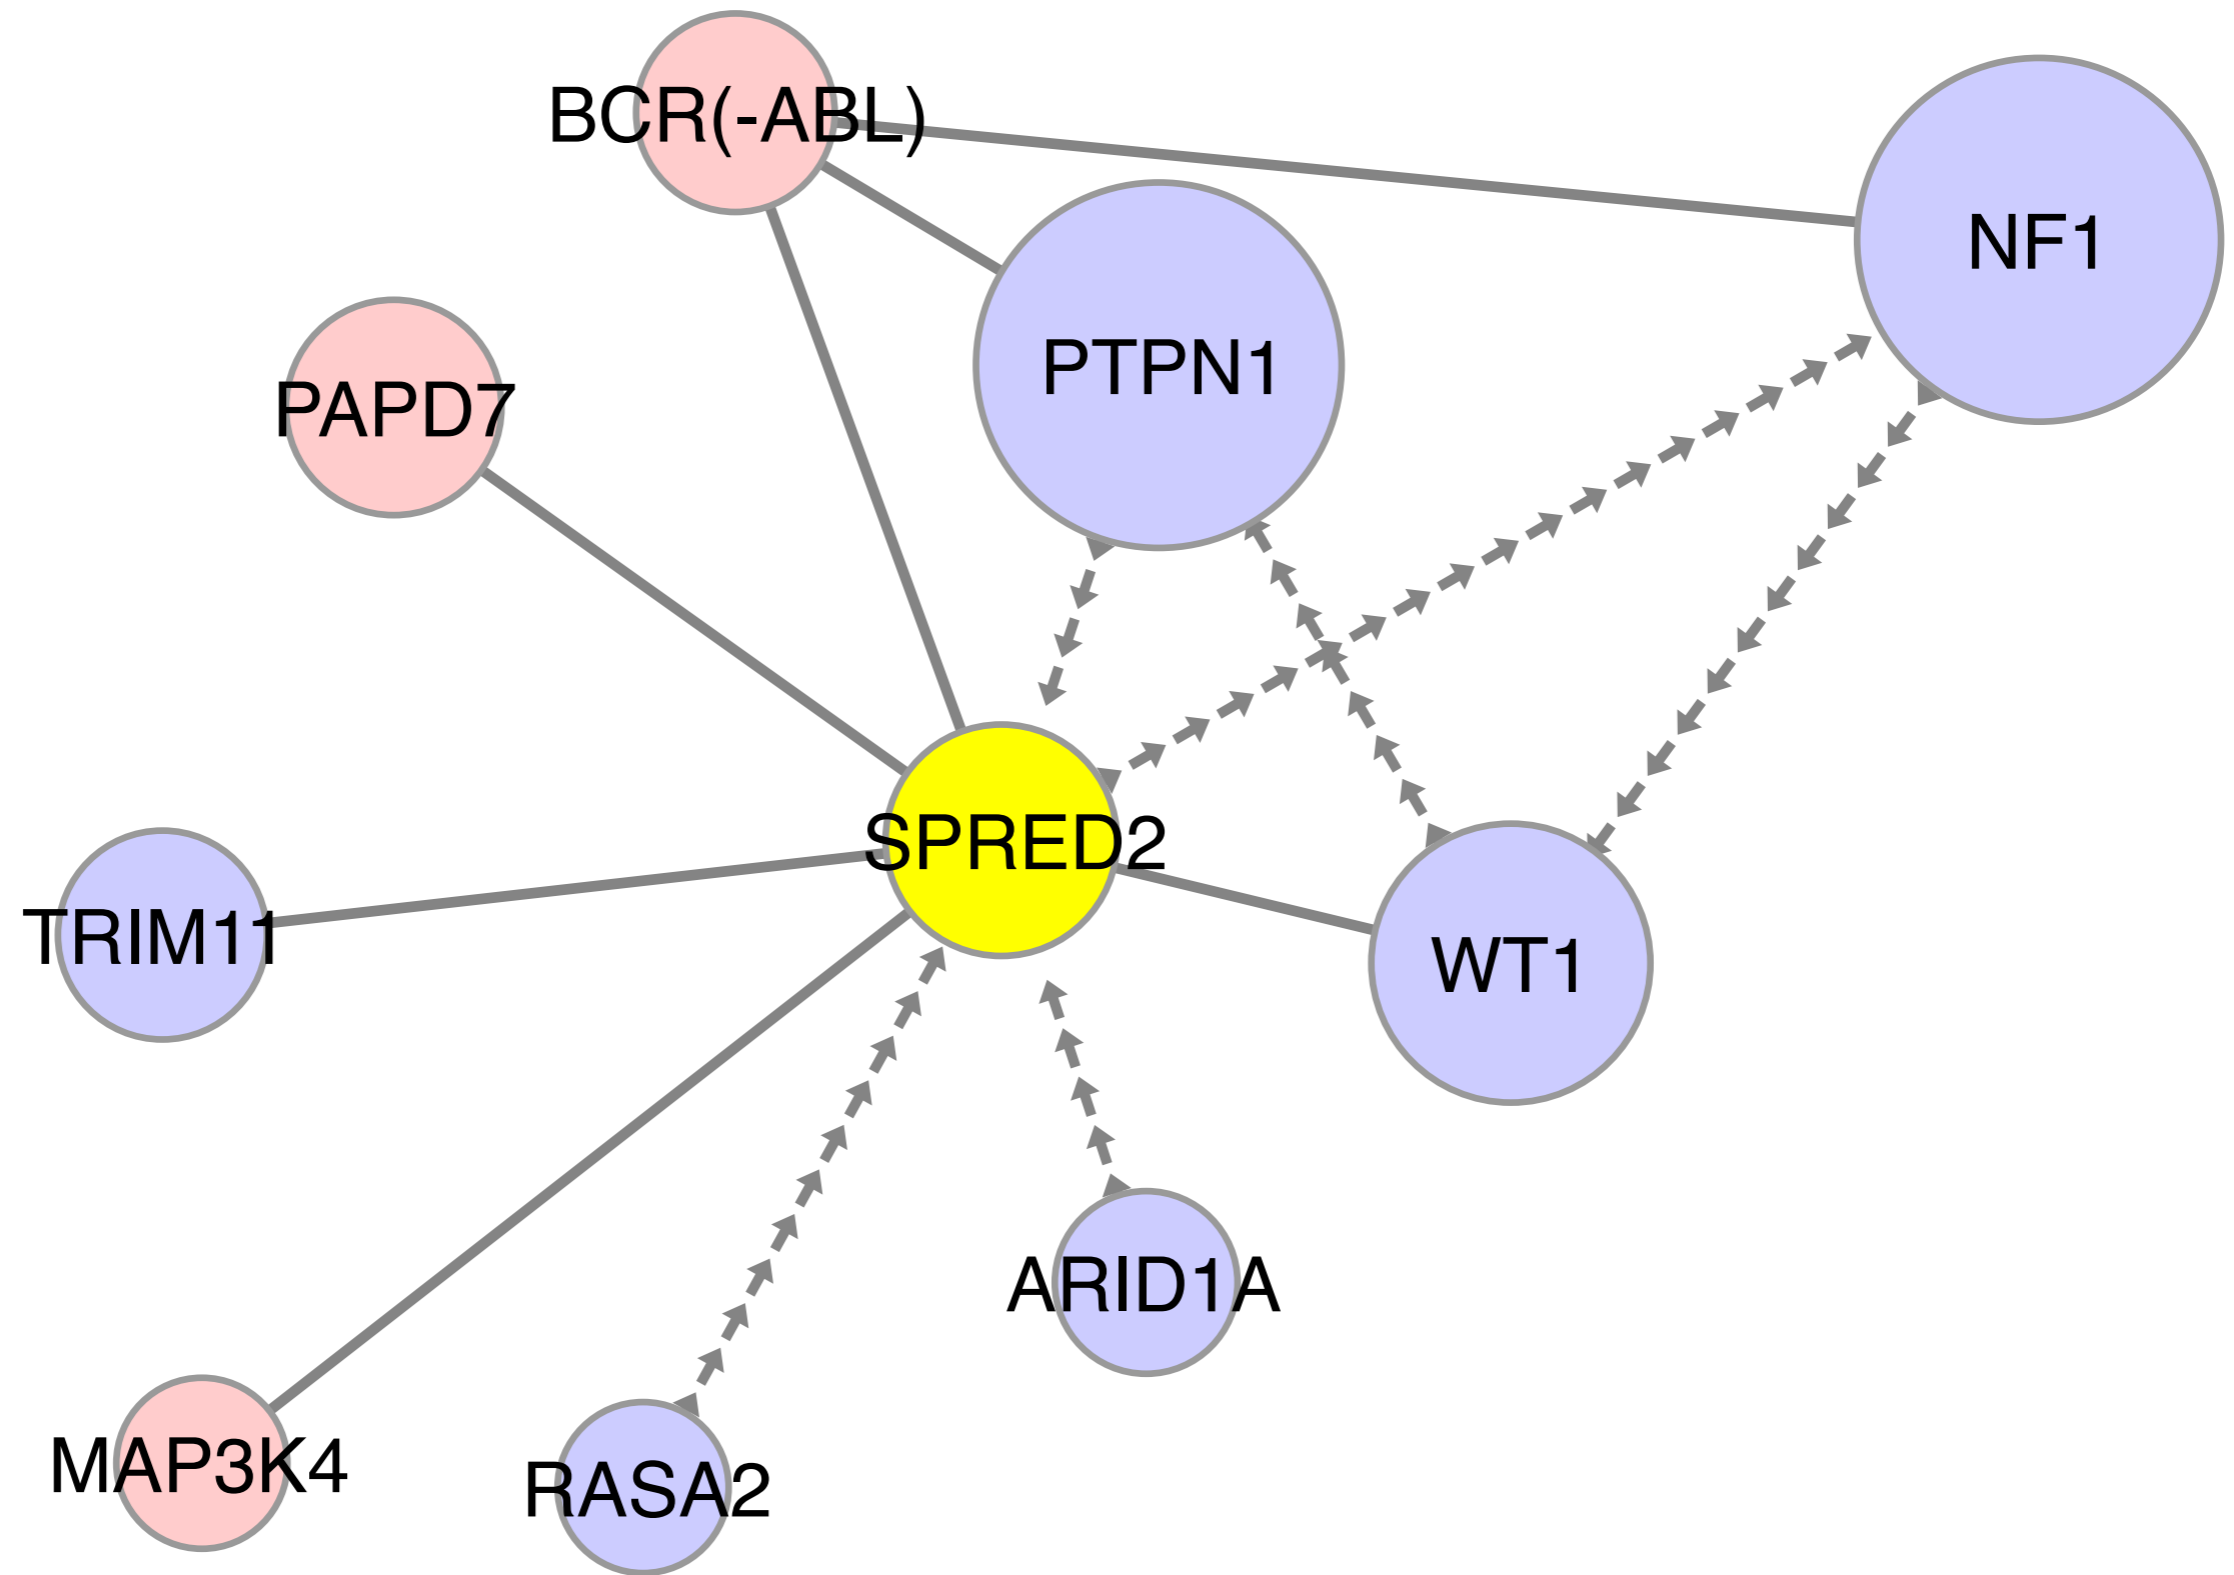

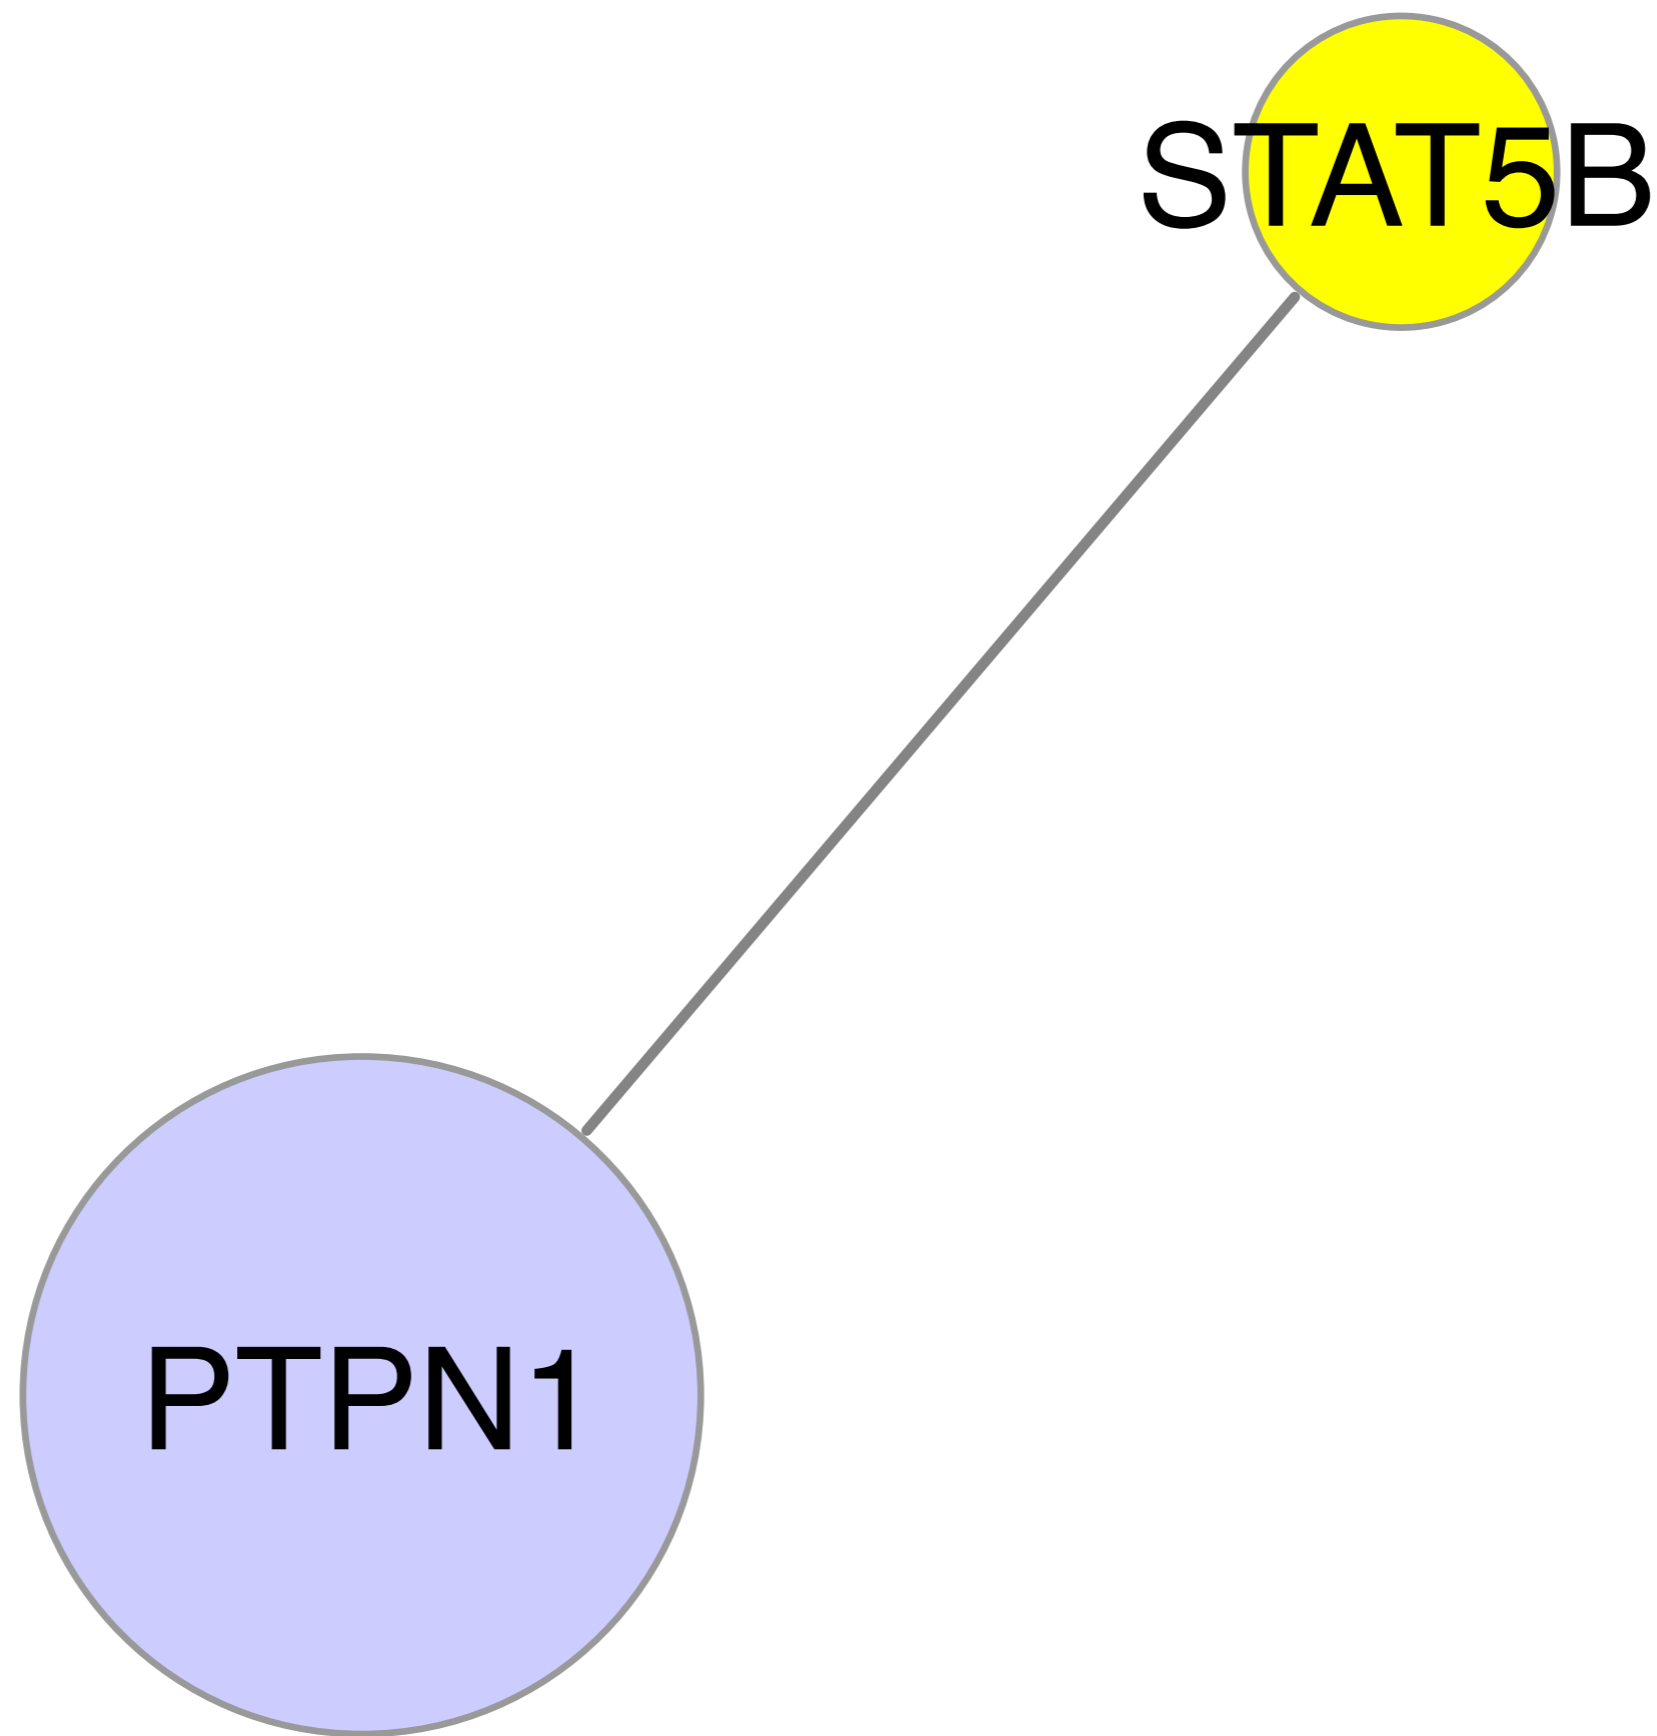

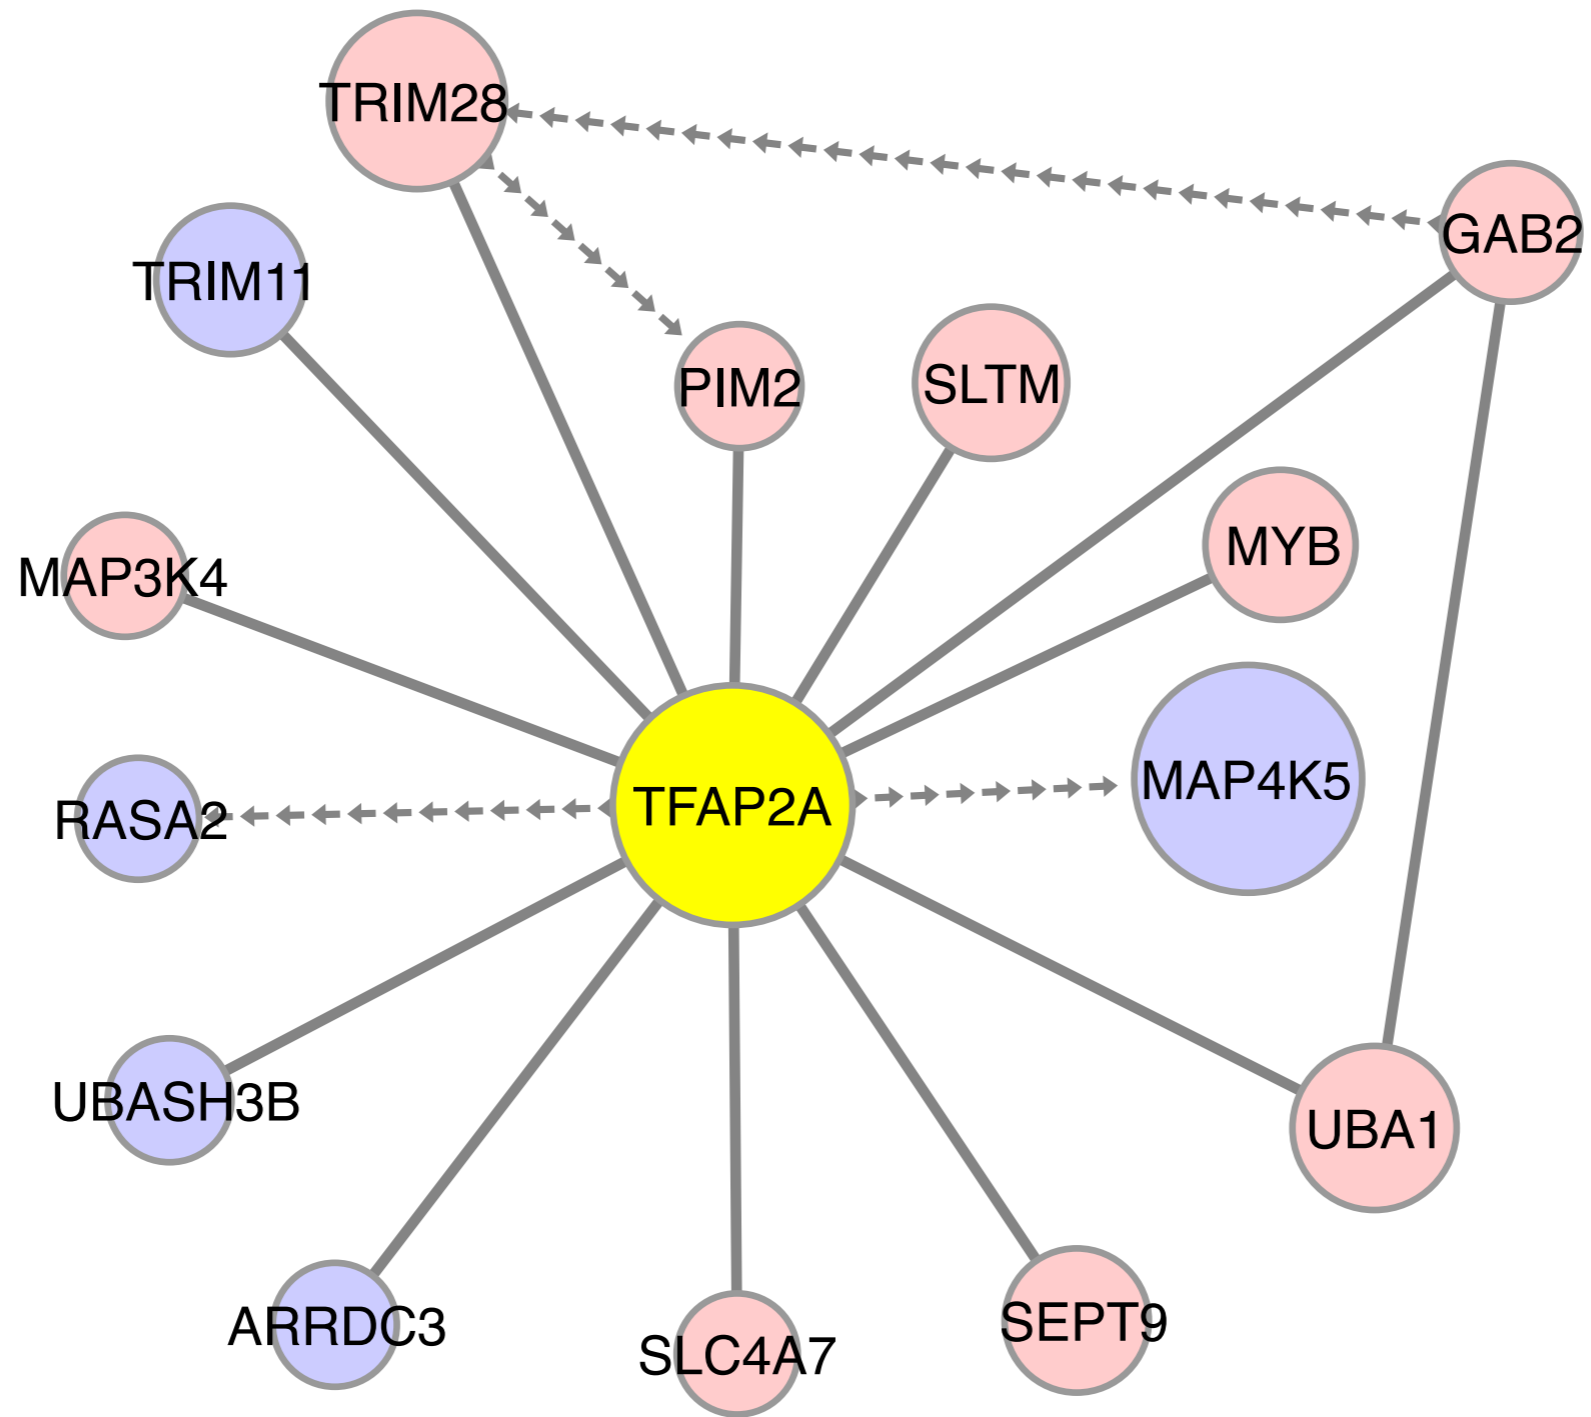

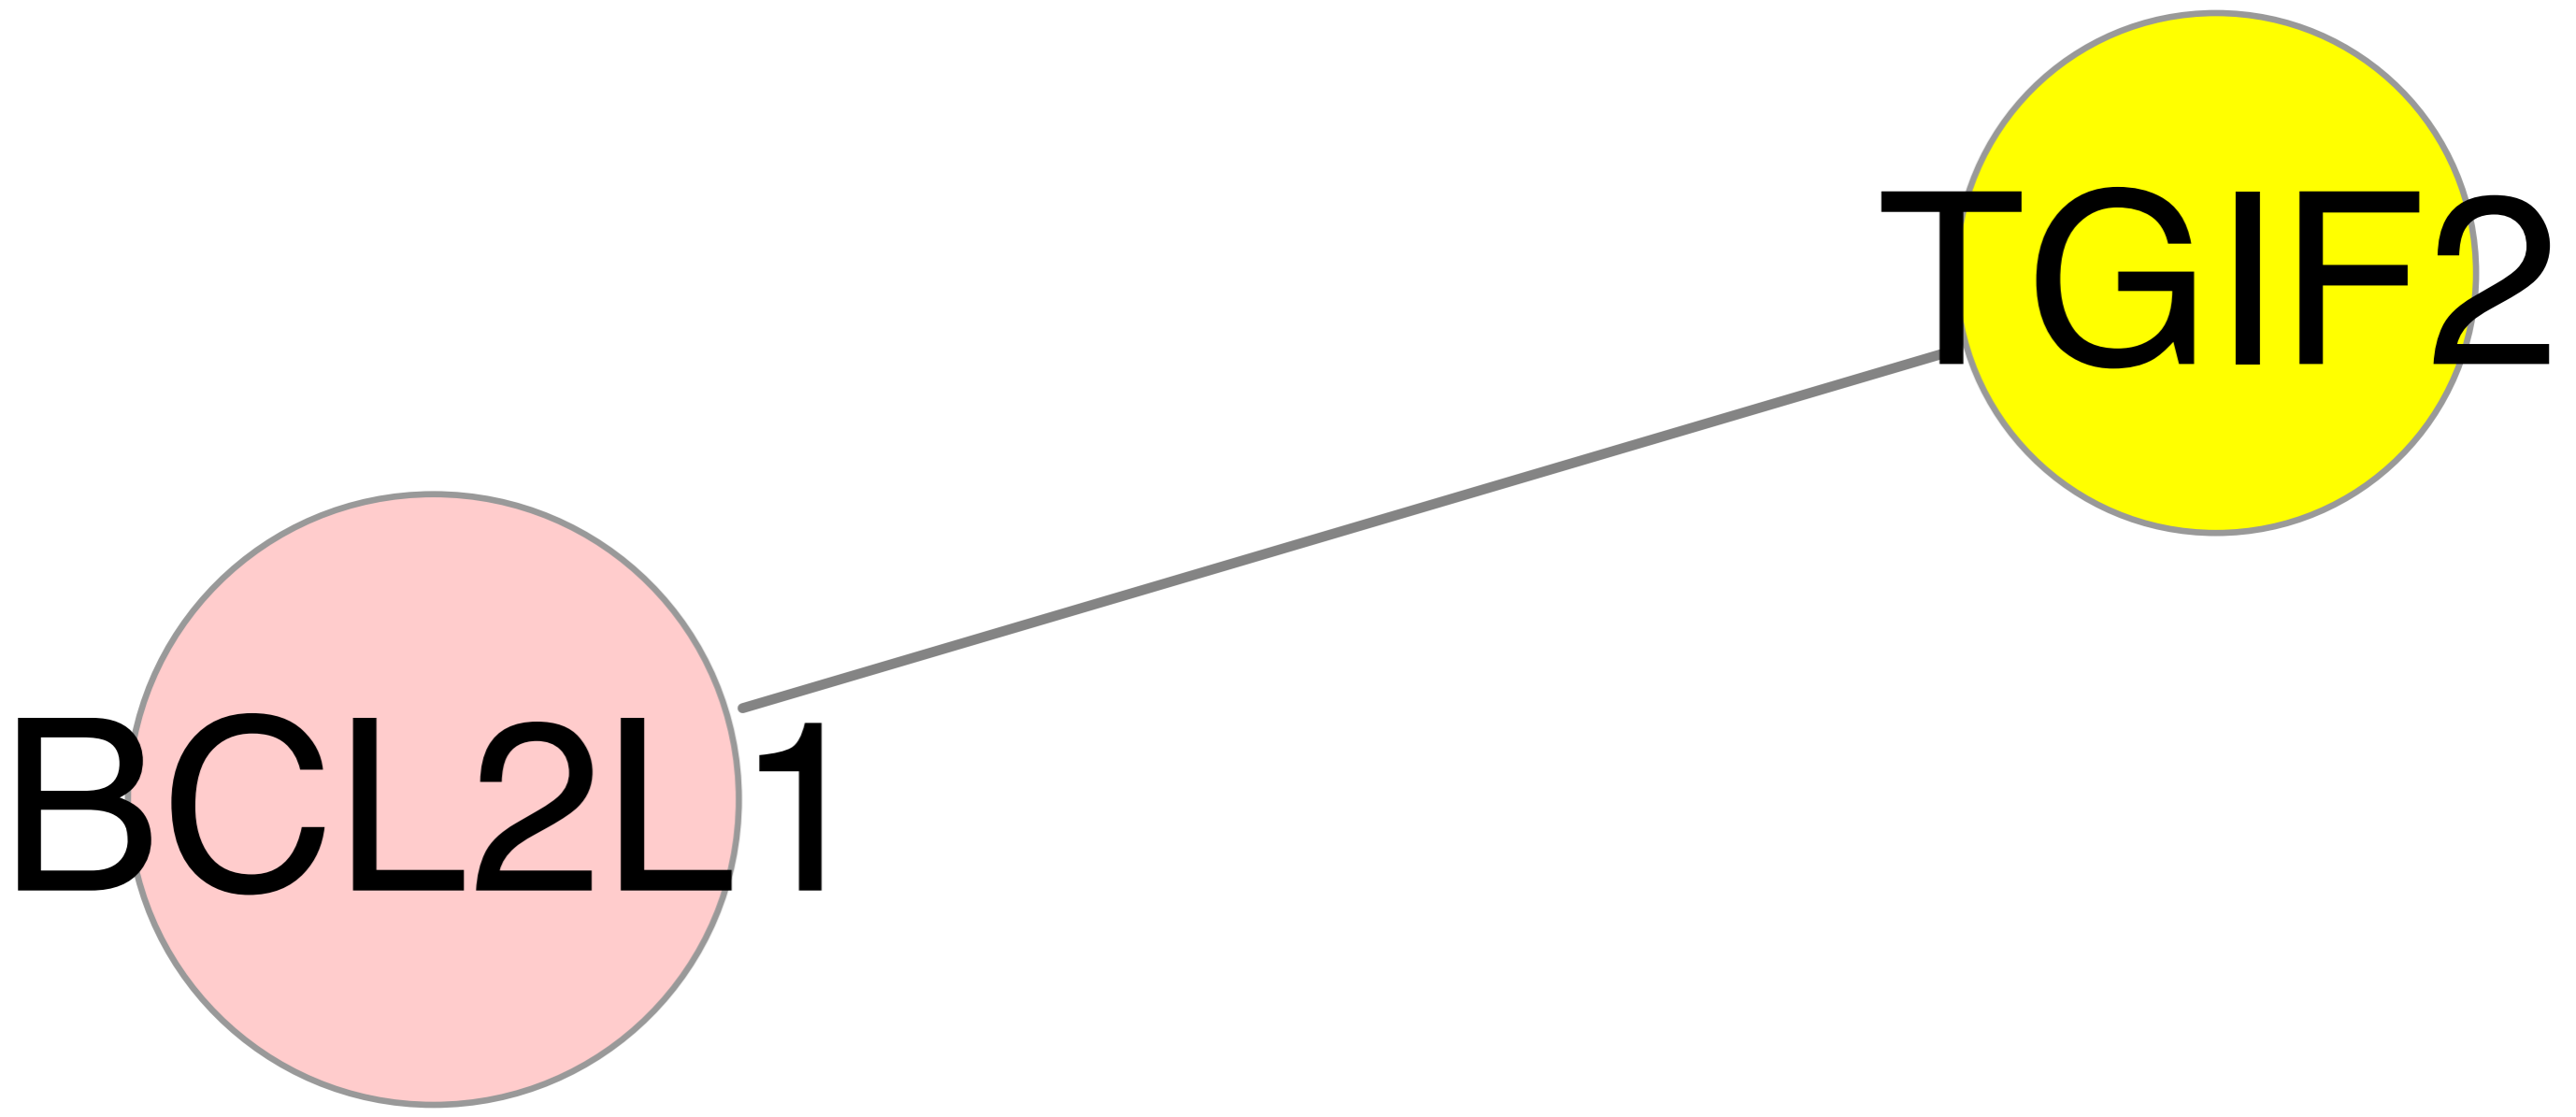

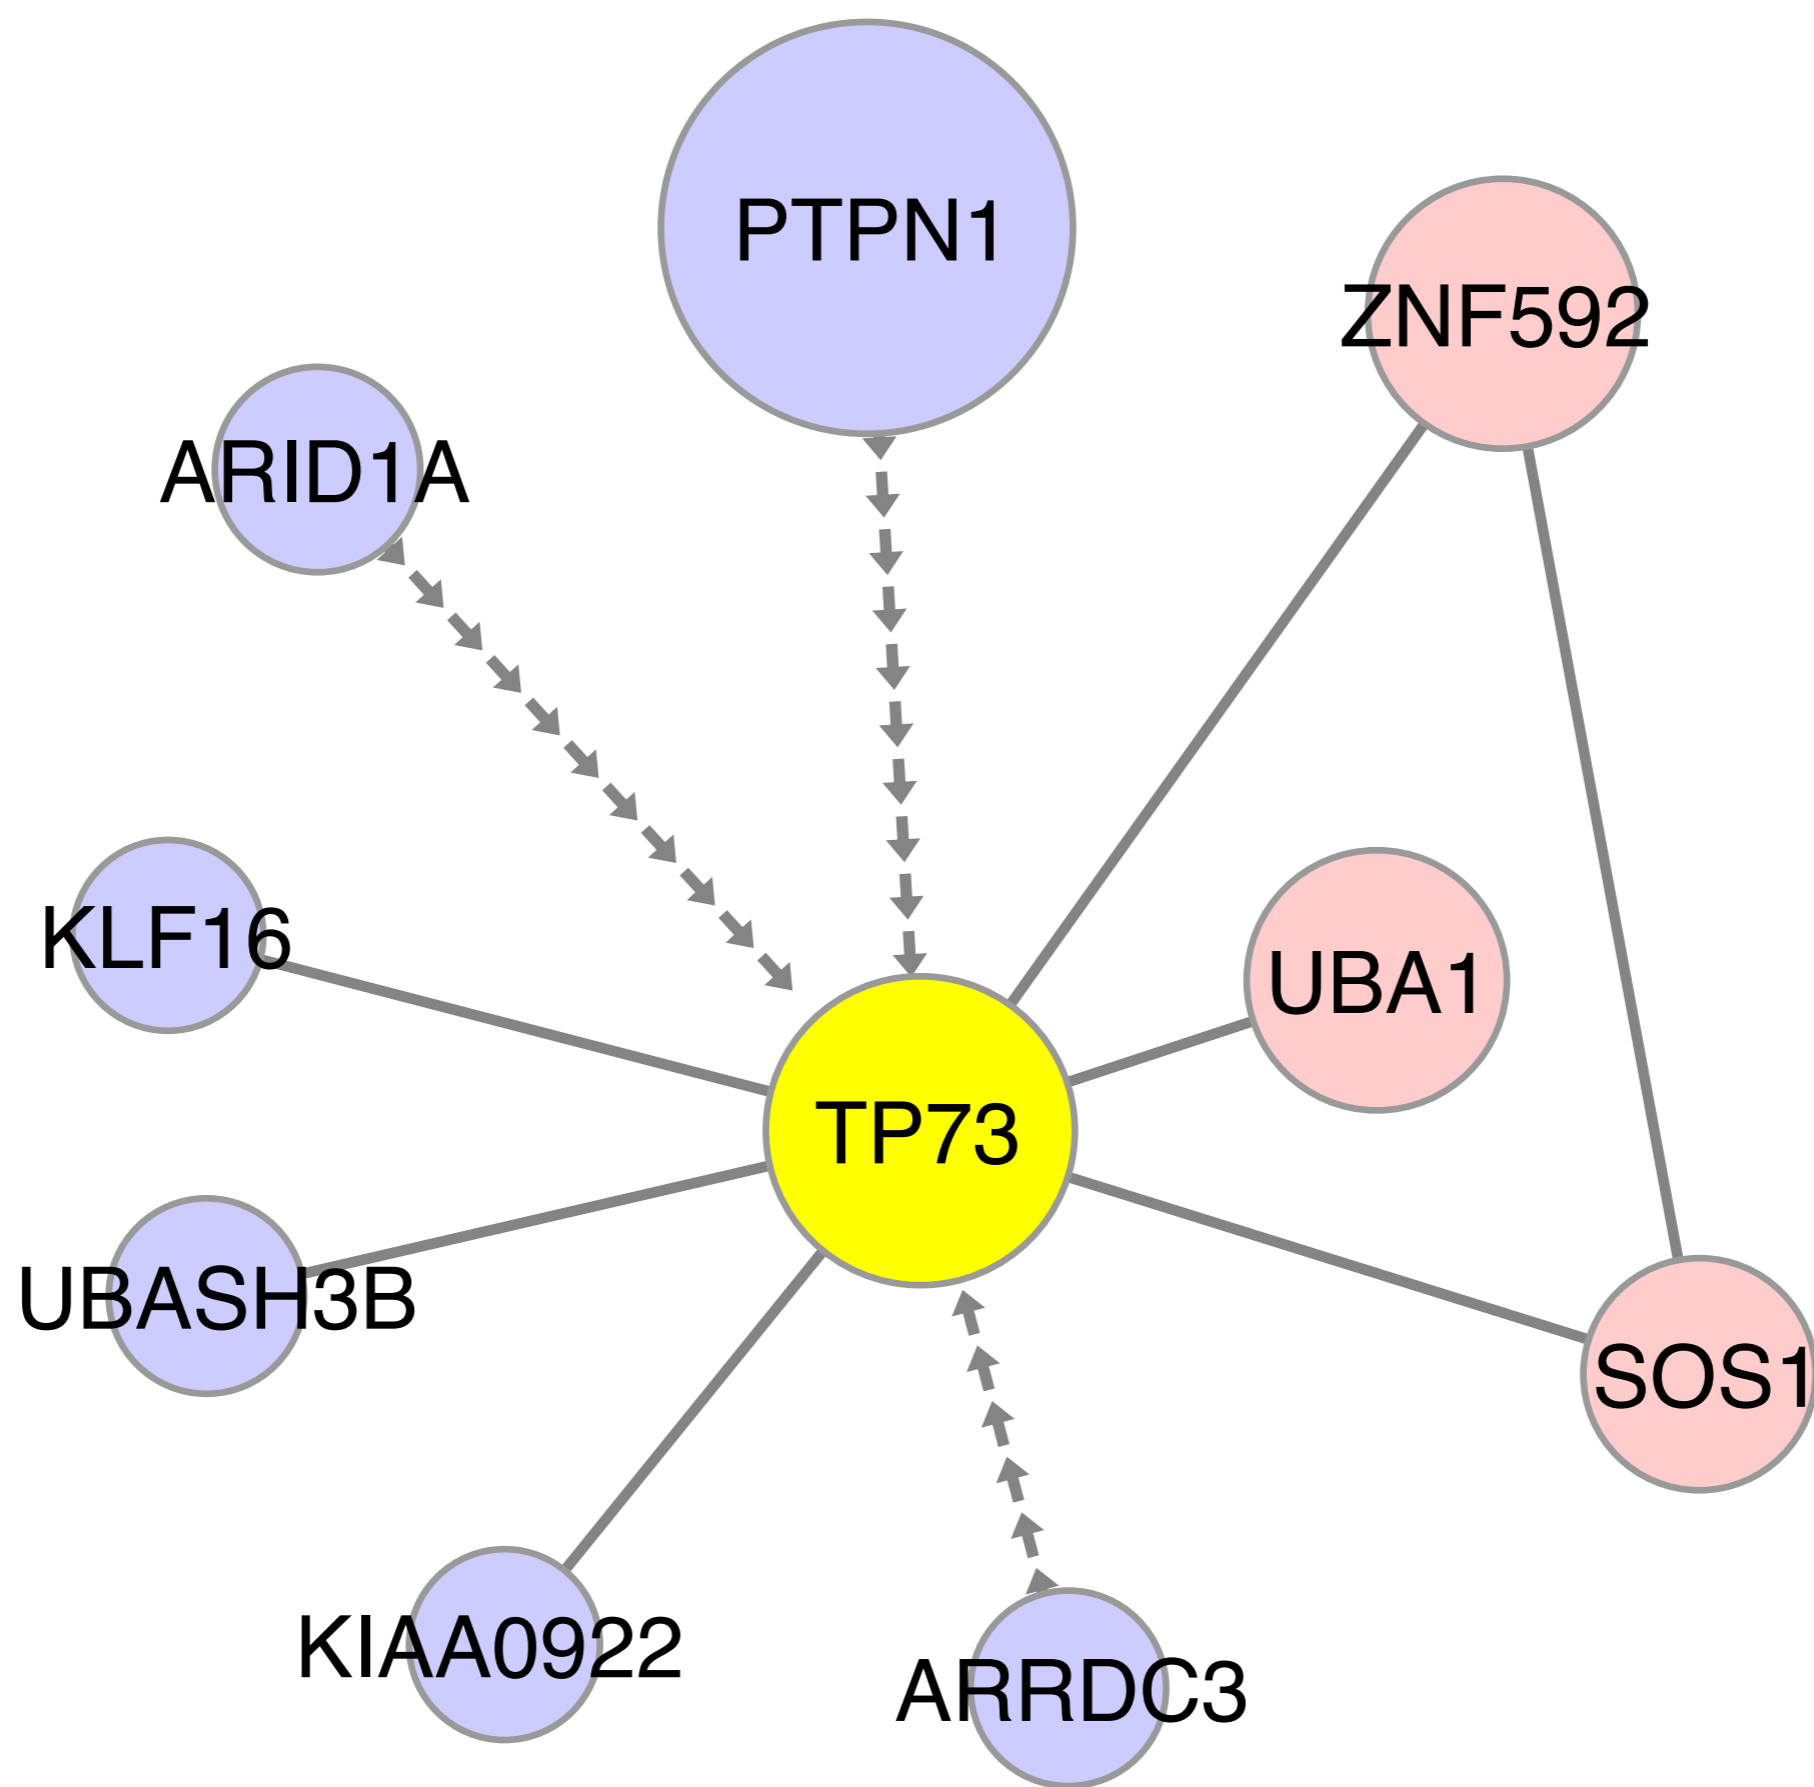

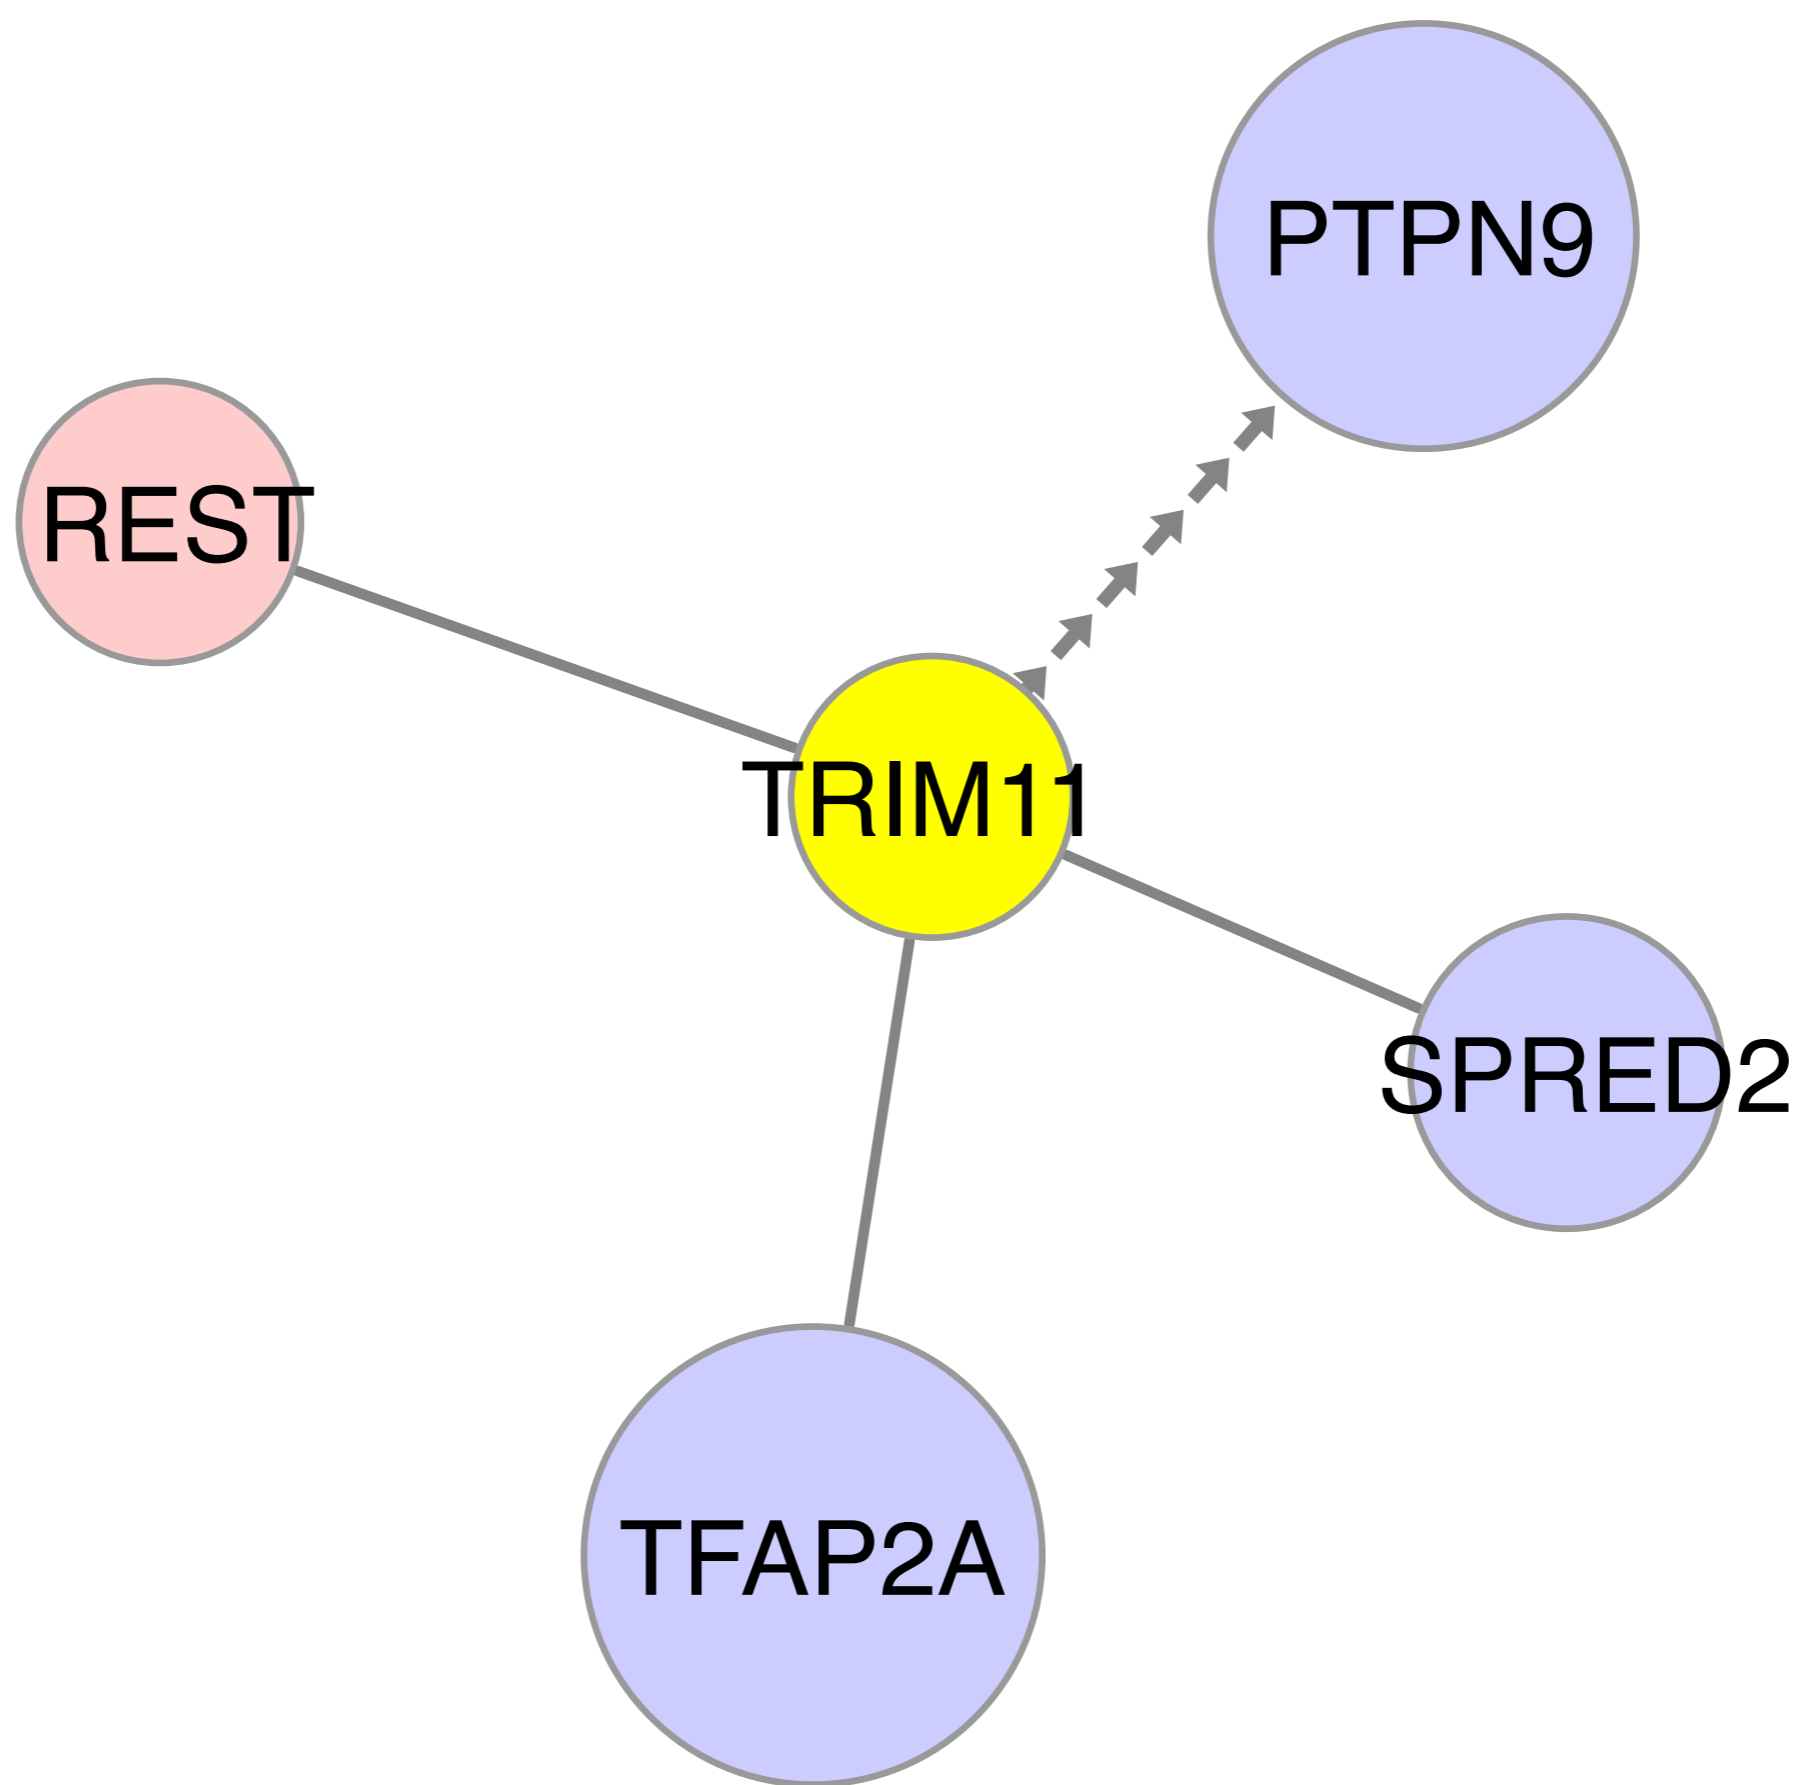

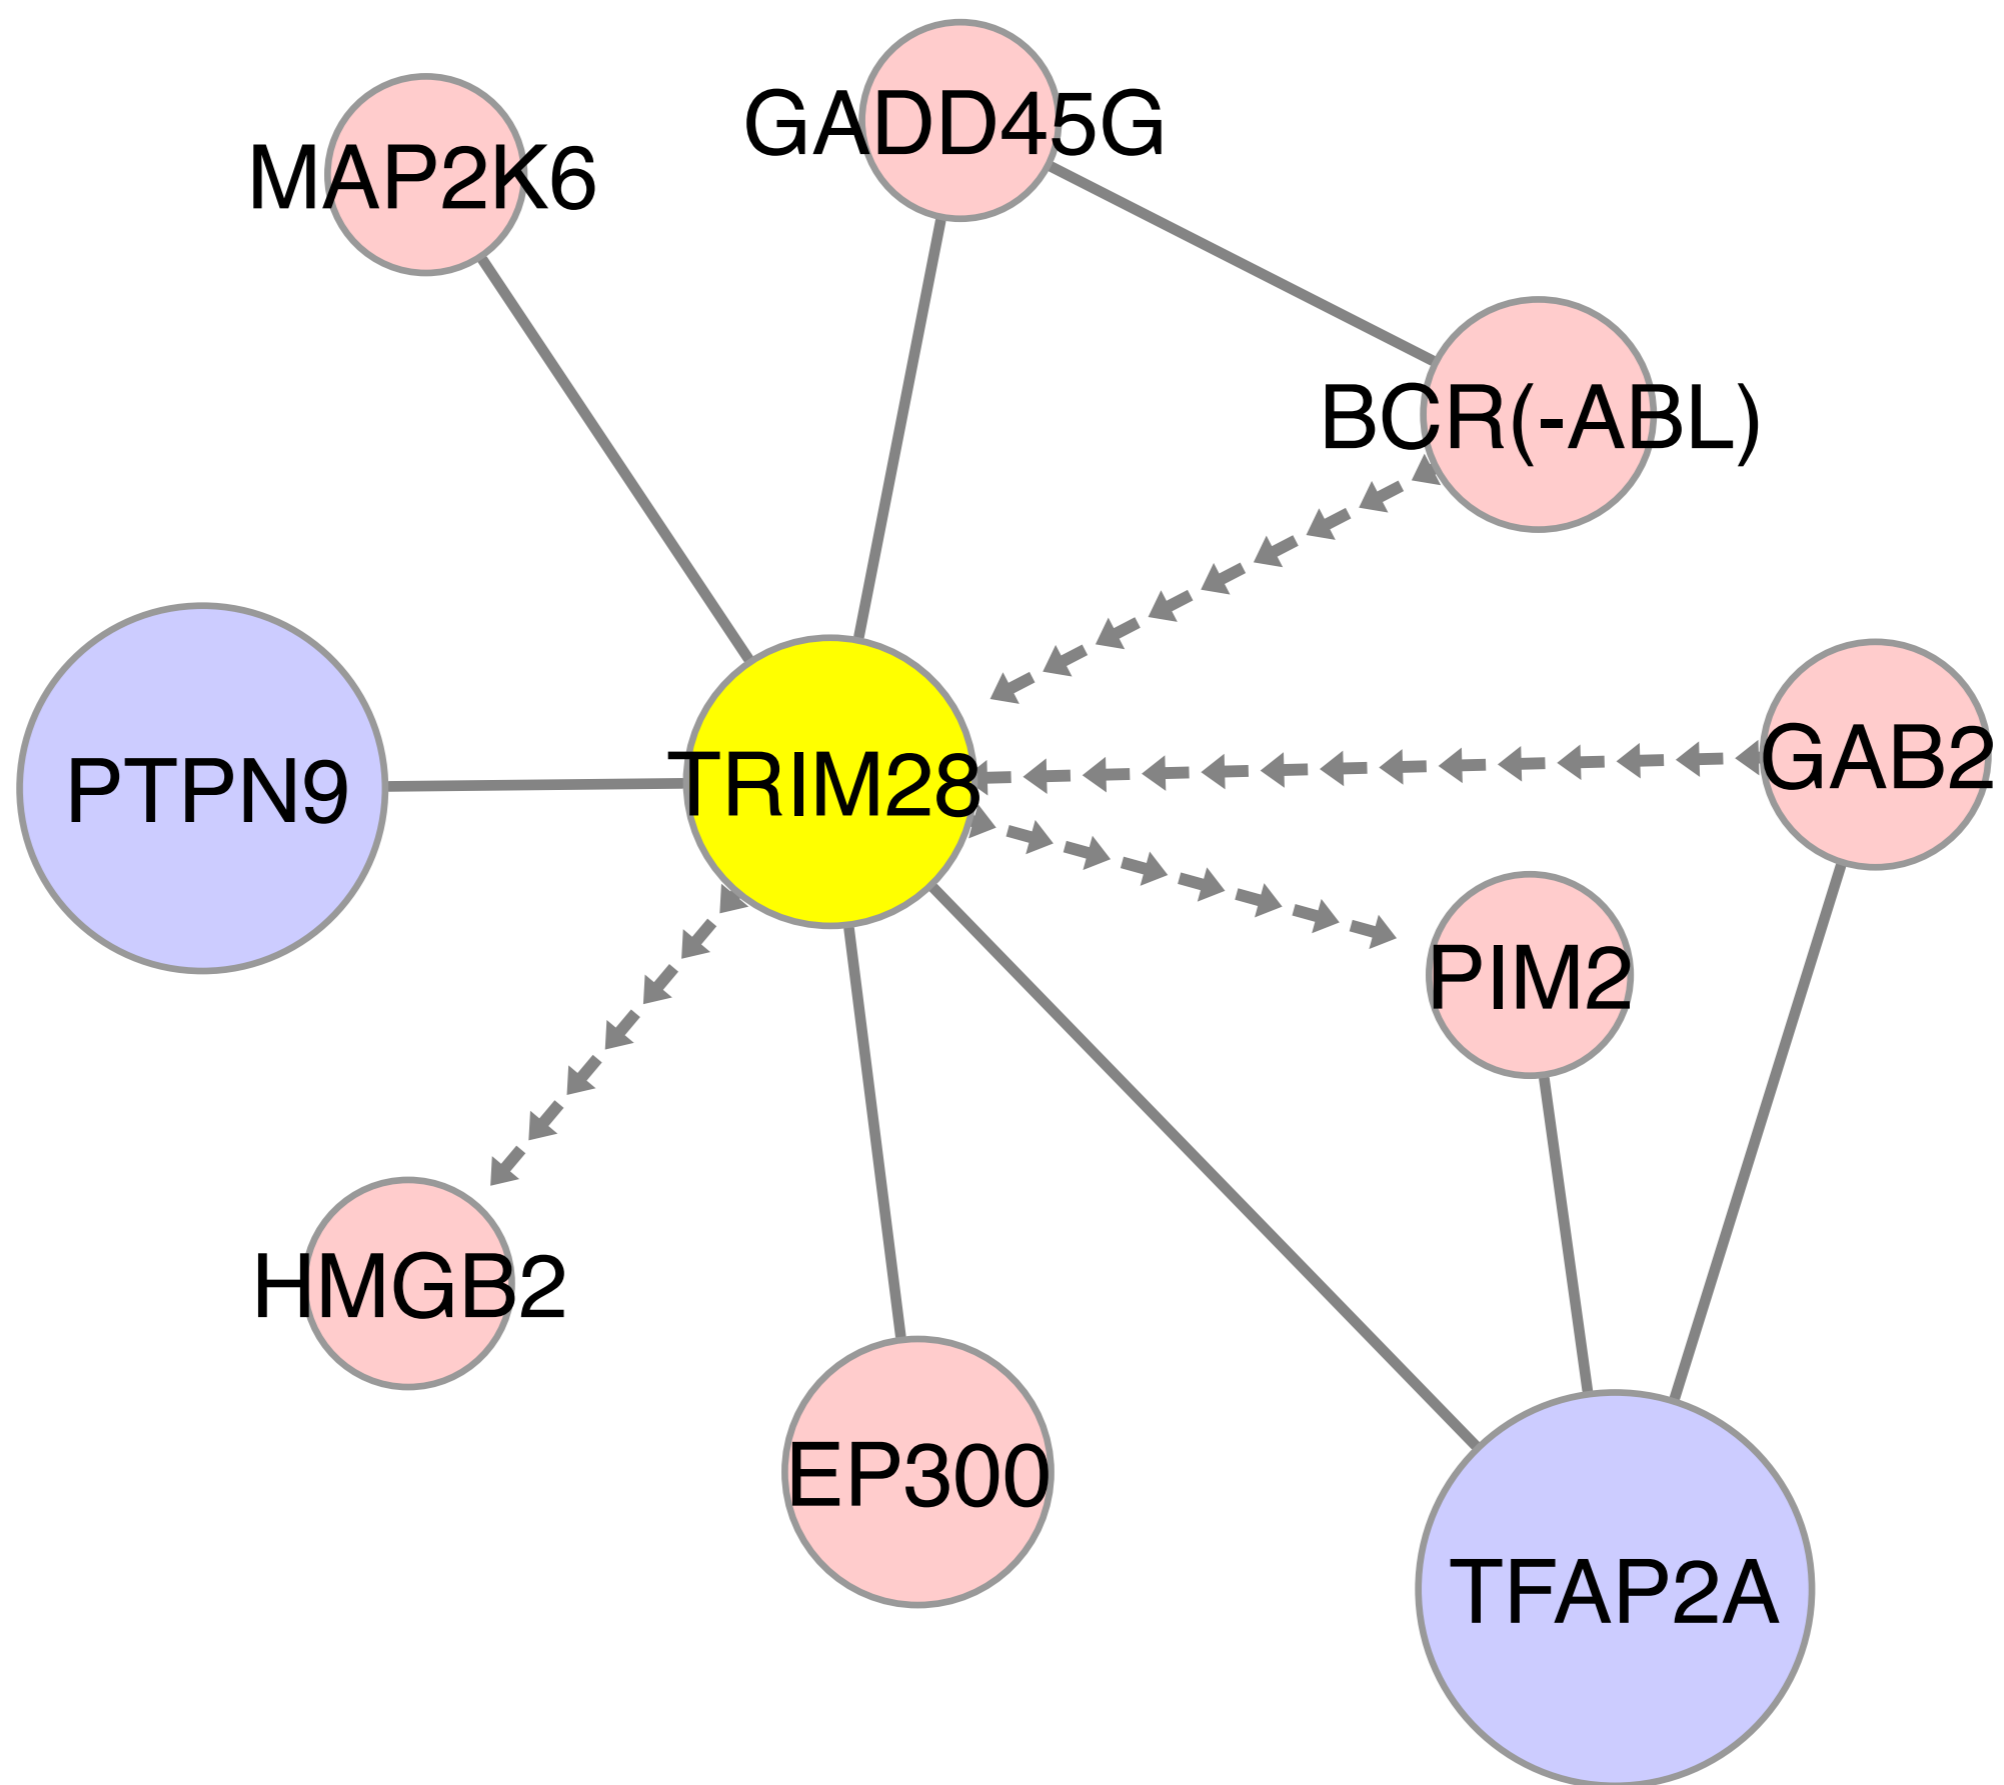



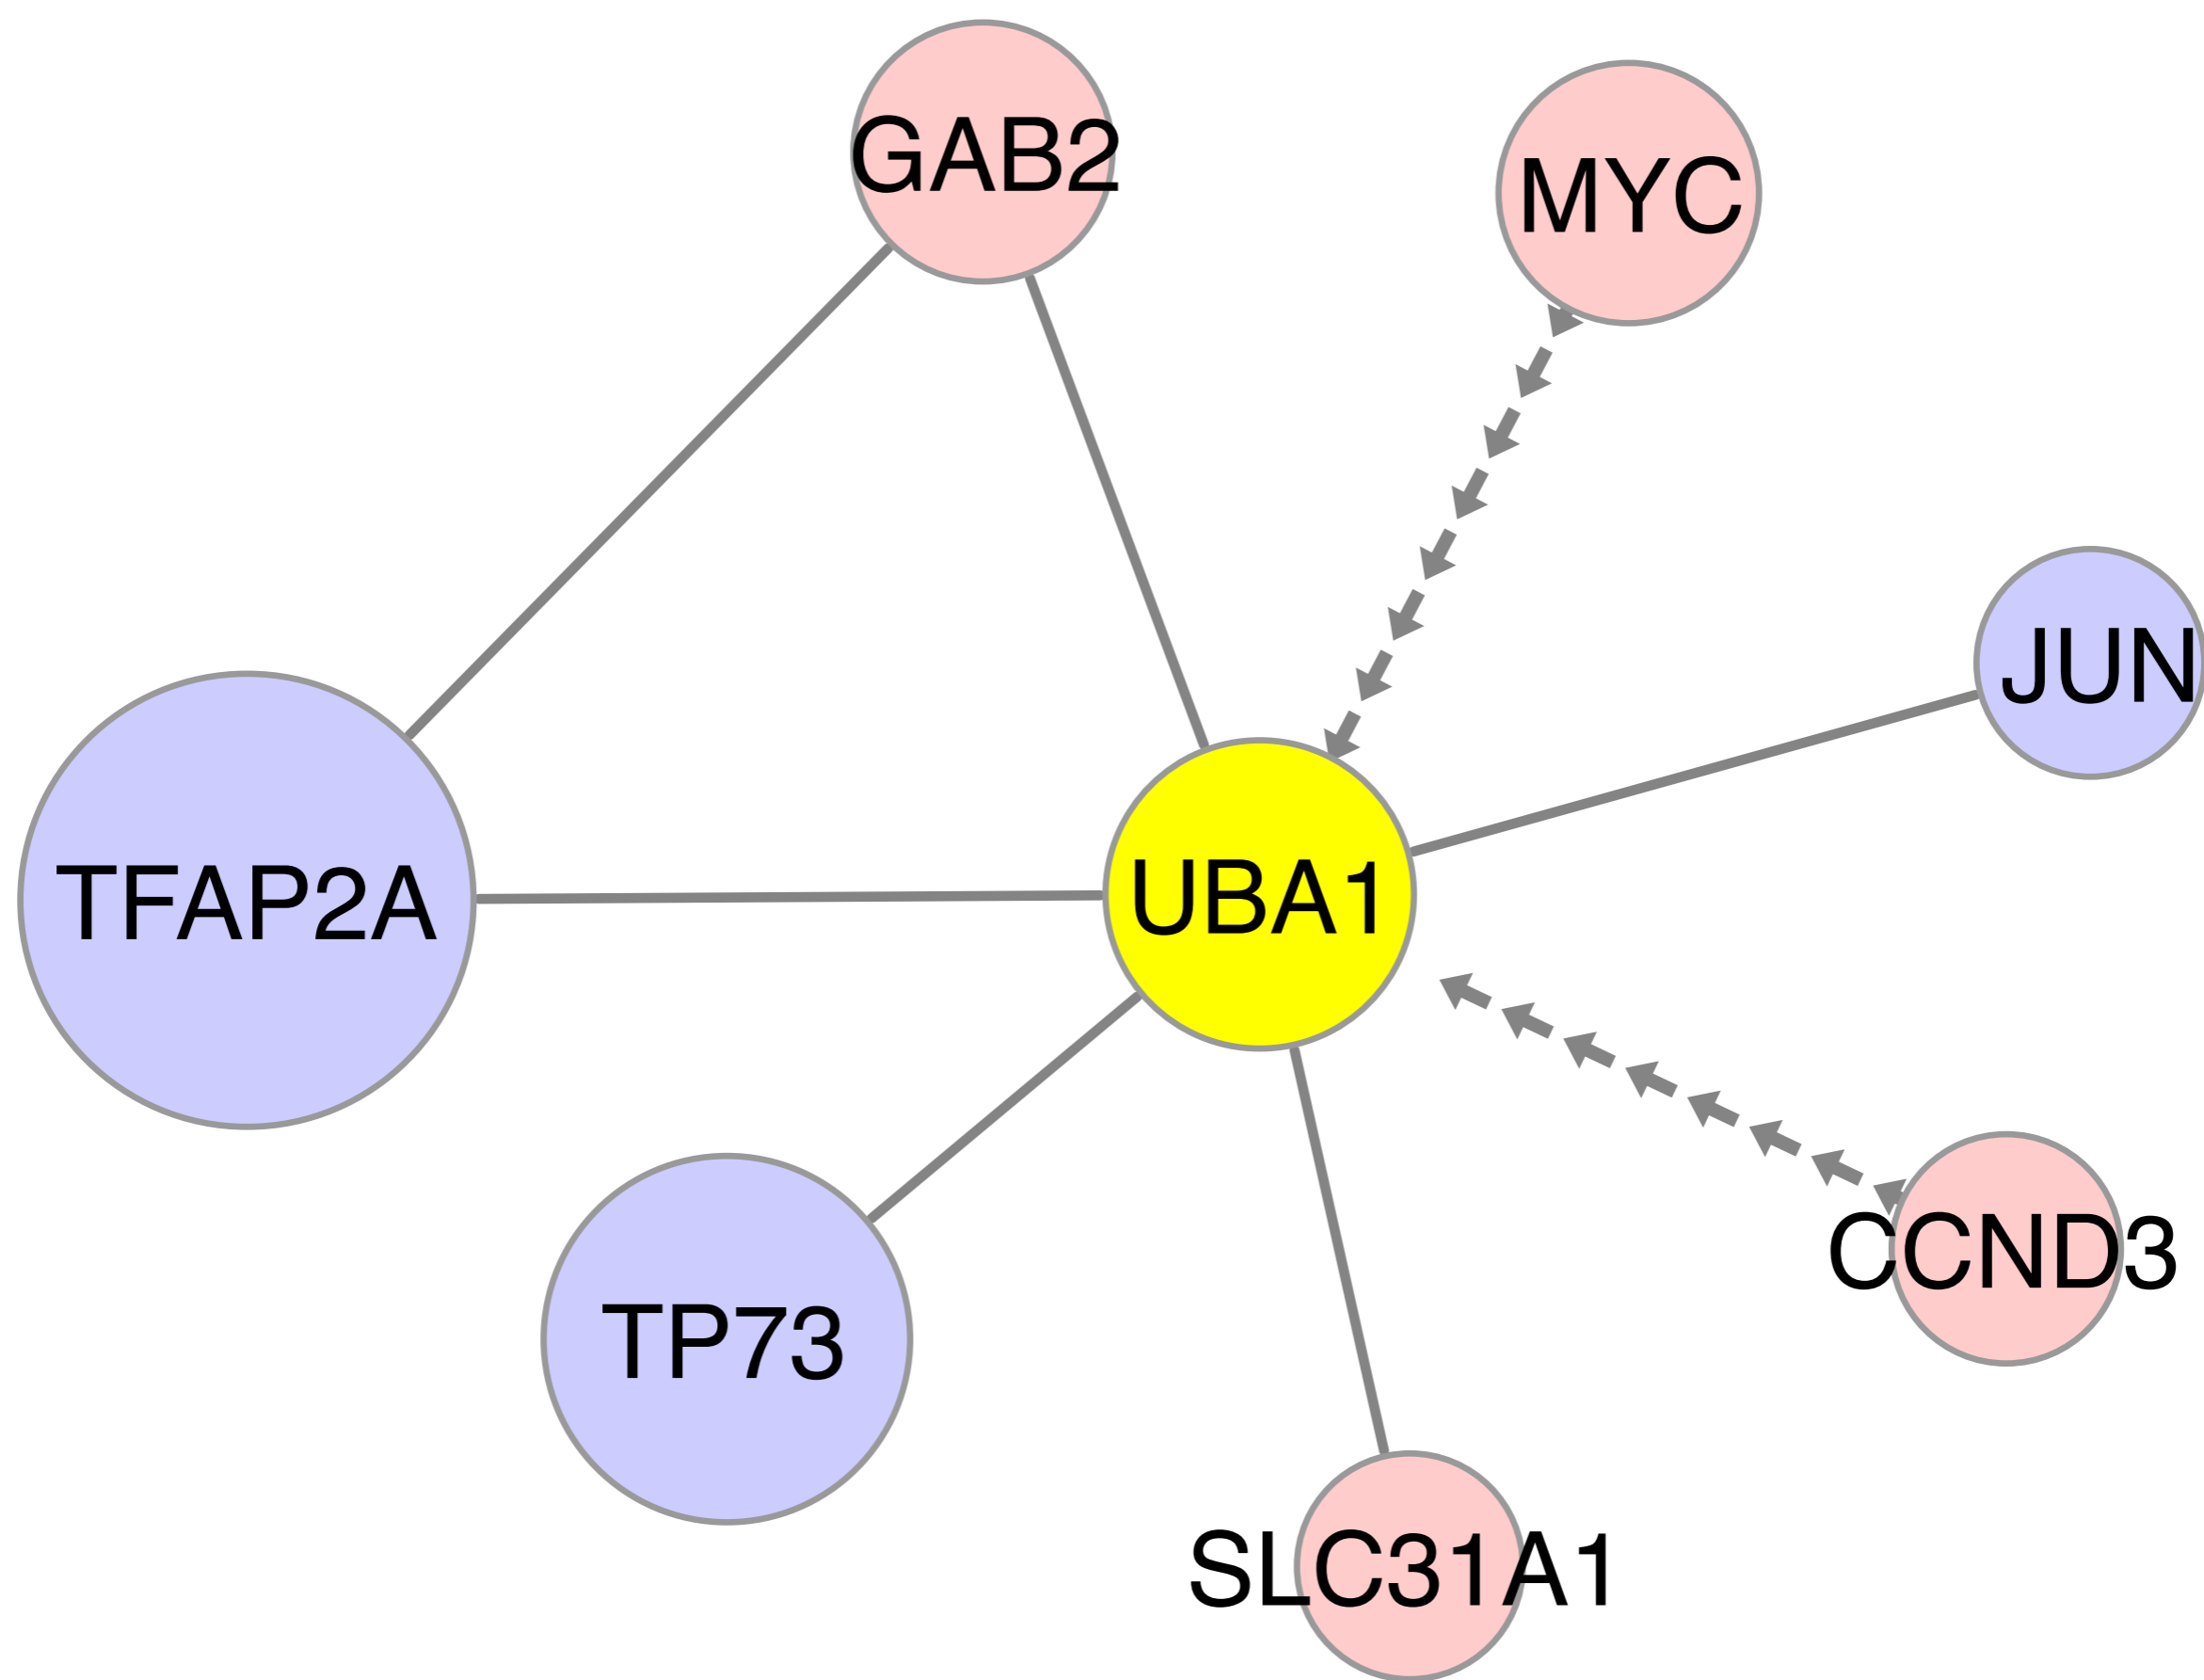

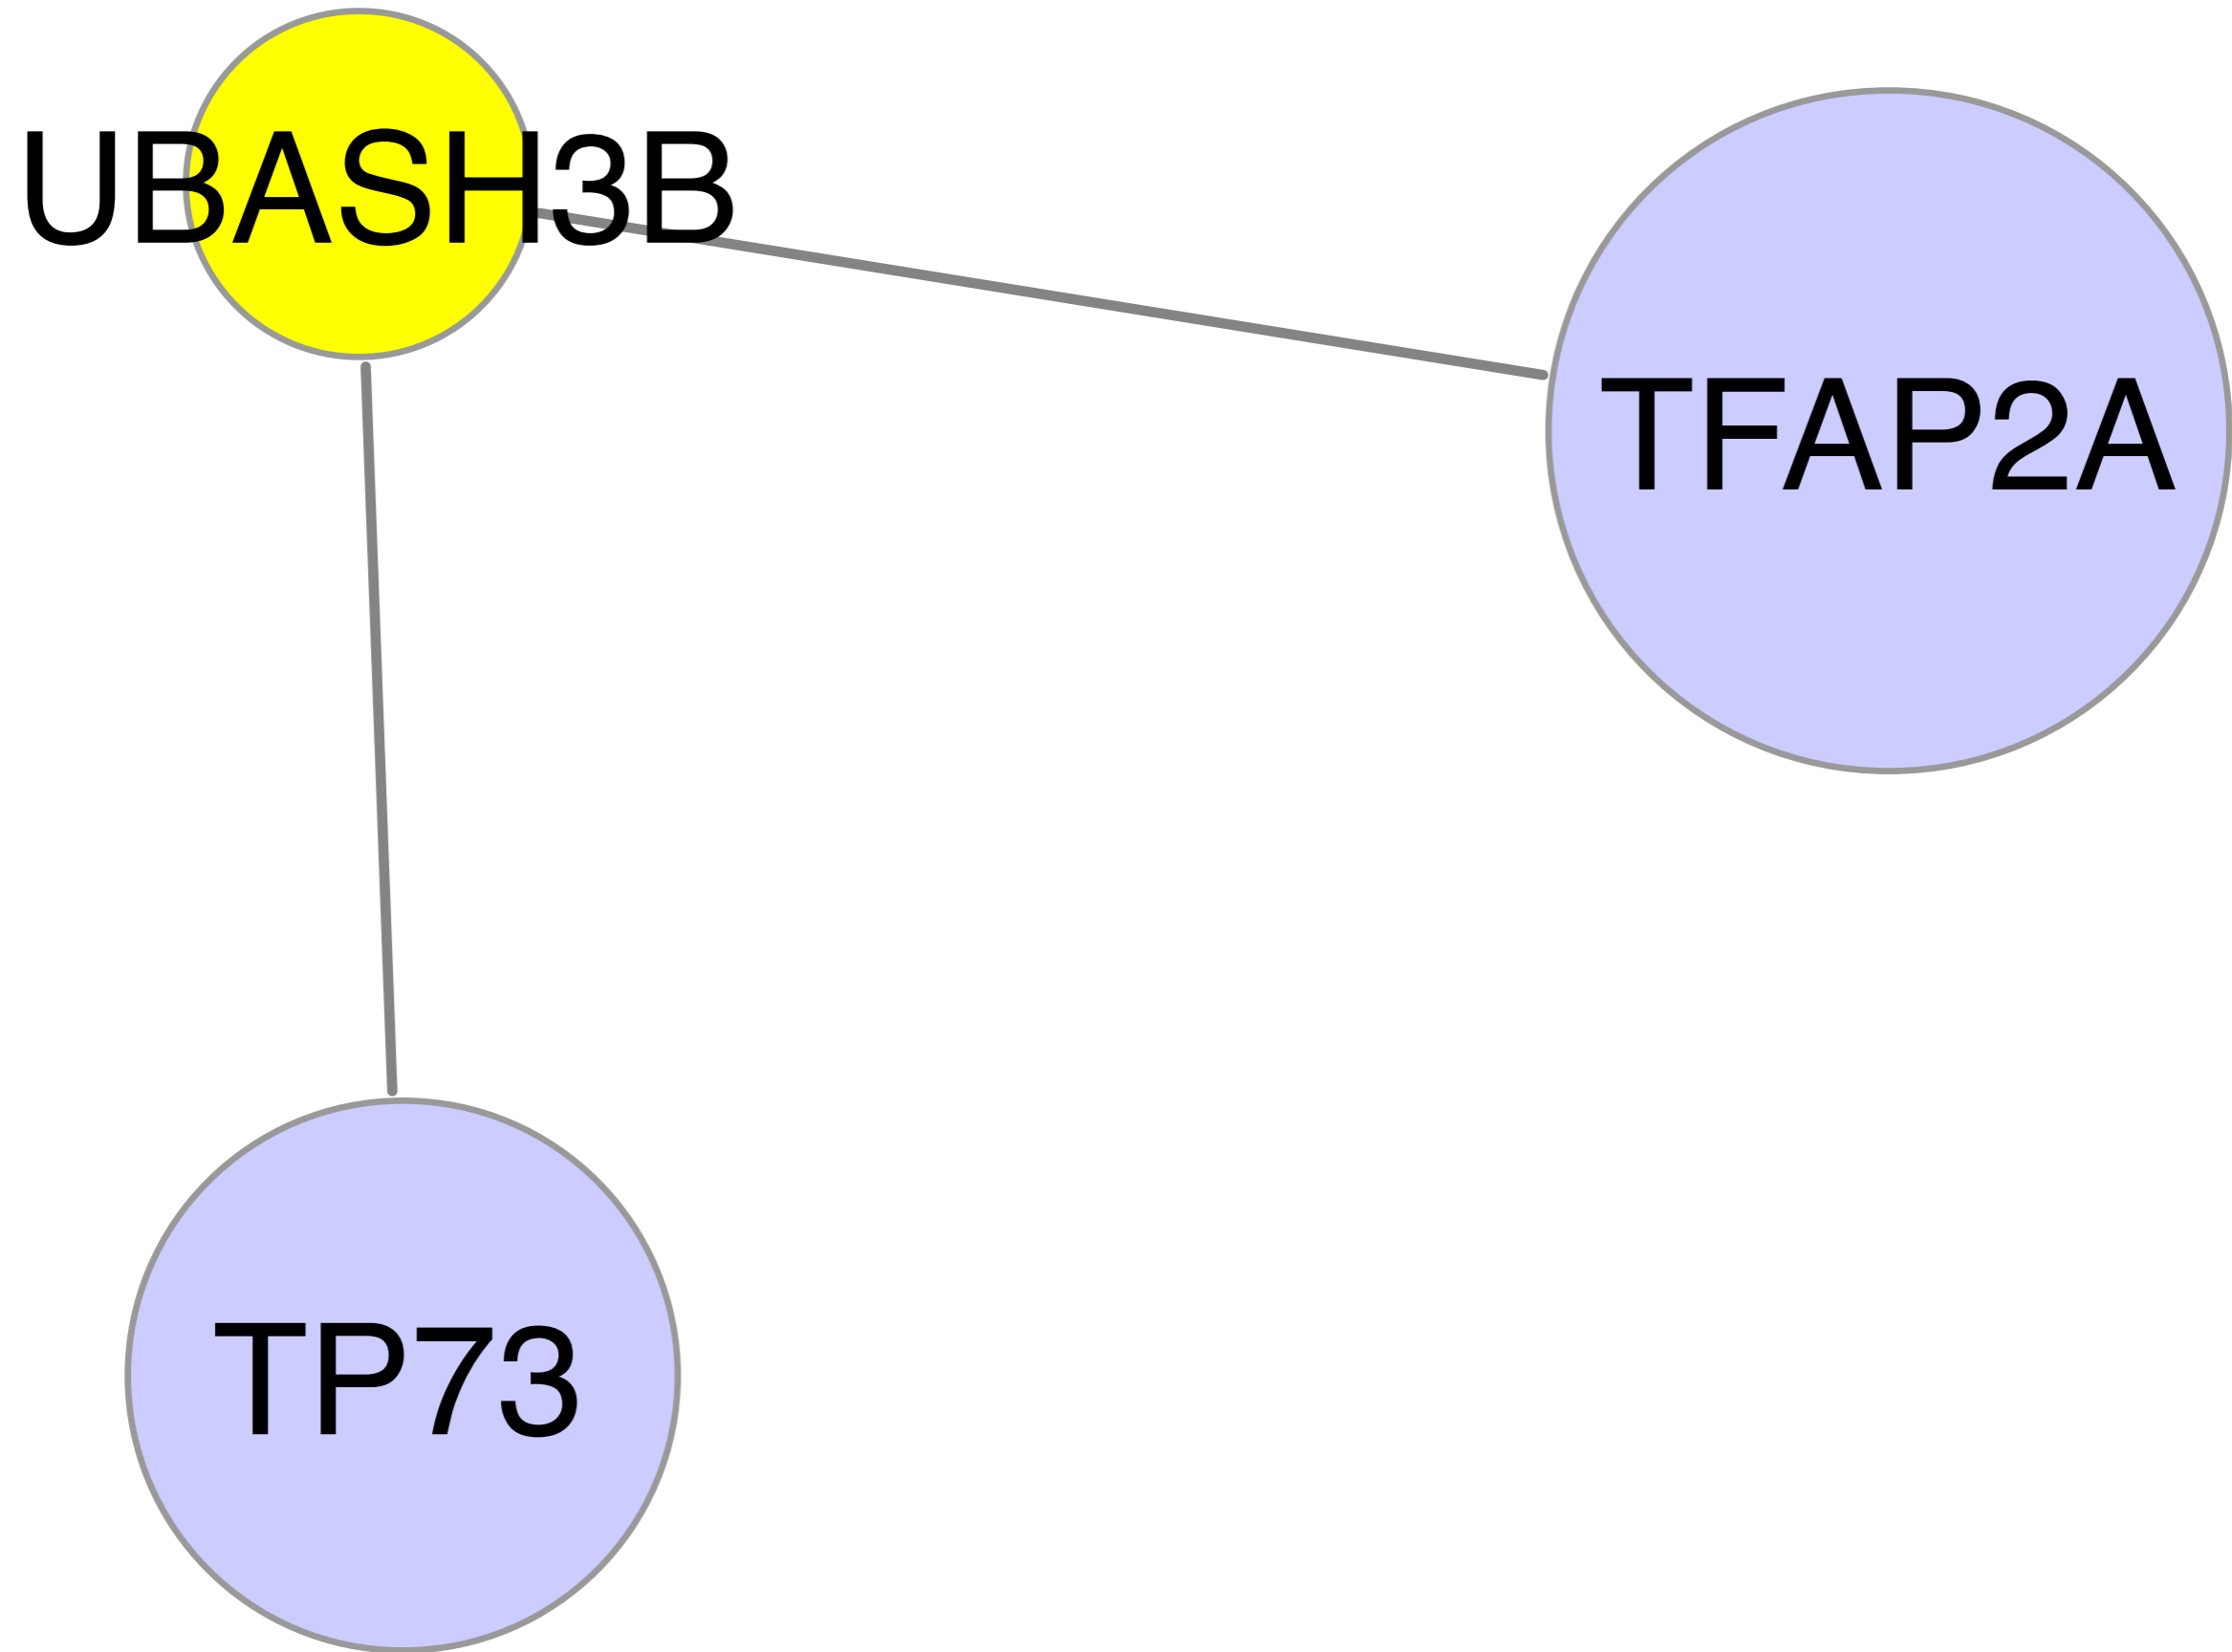

**UBASH3B**

**TFAP2A**

**TP73**

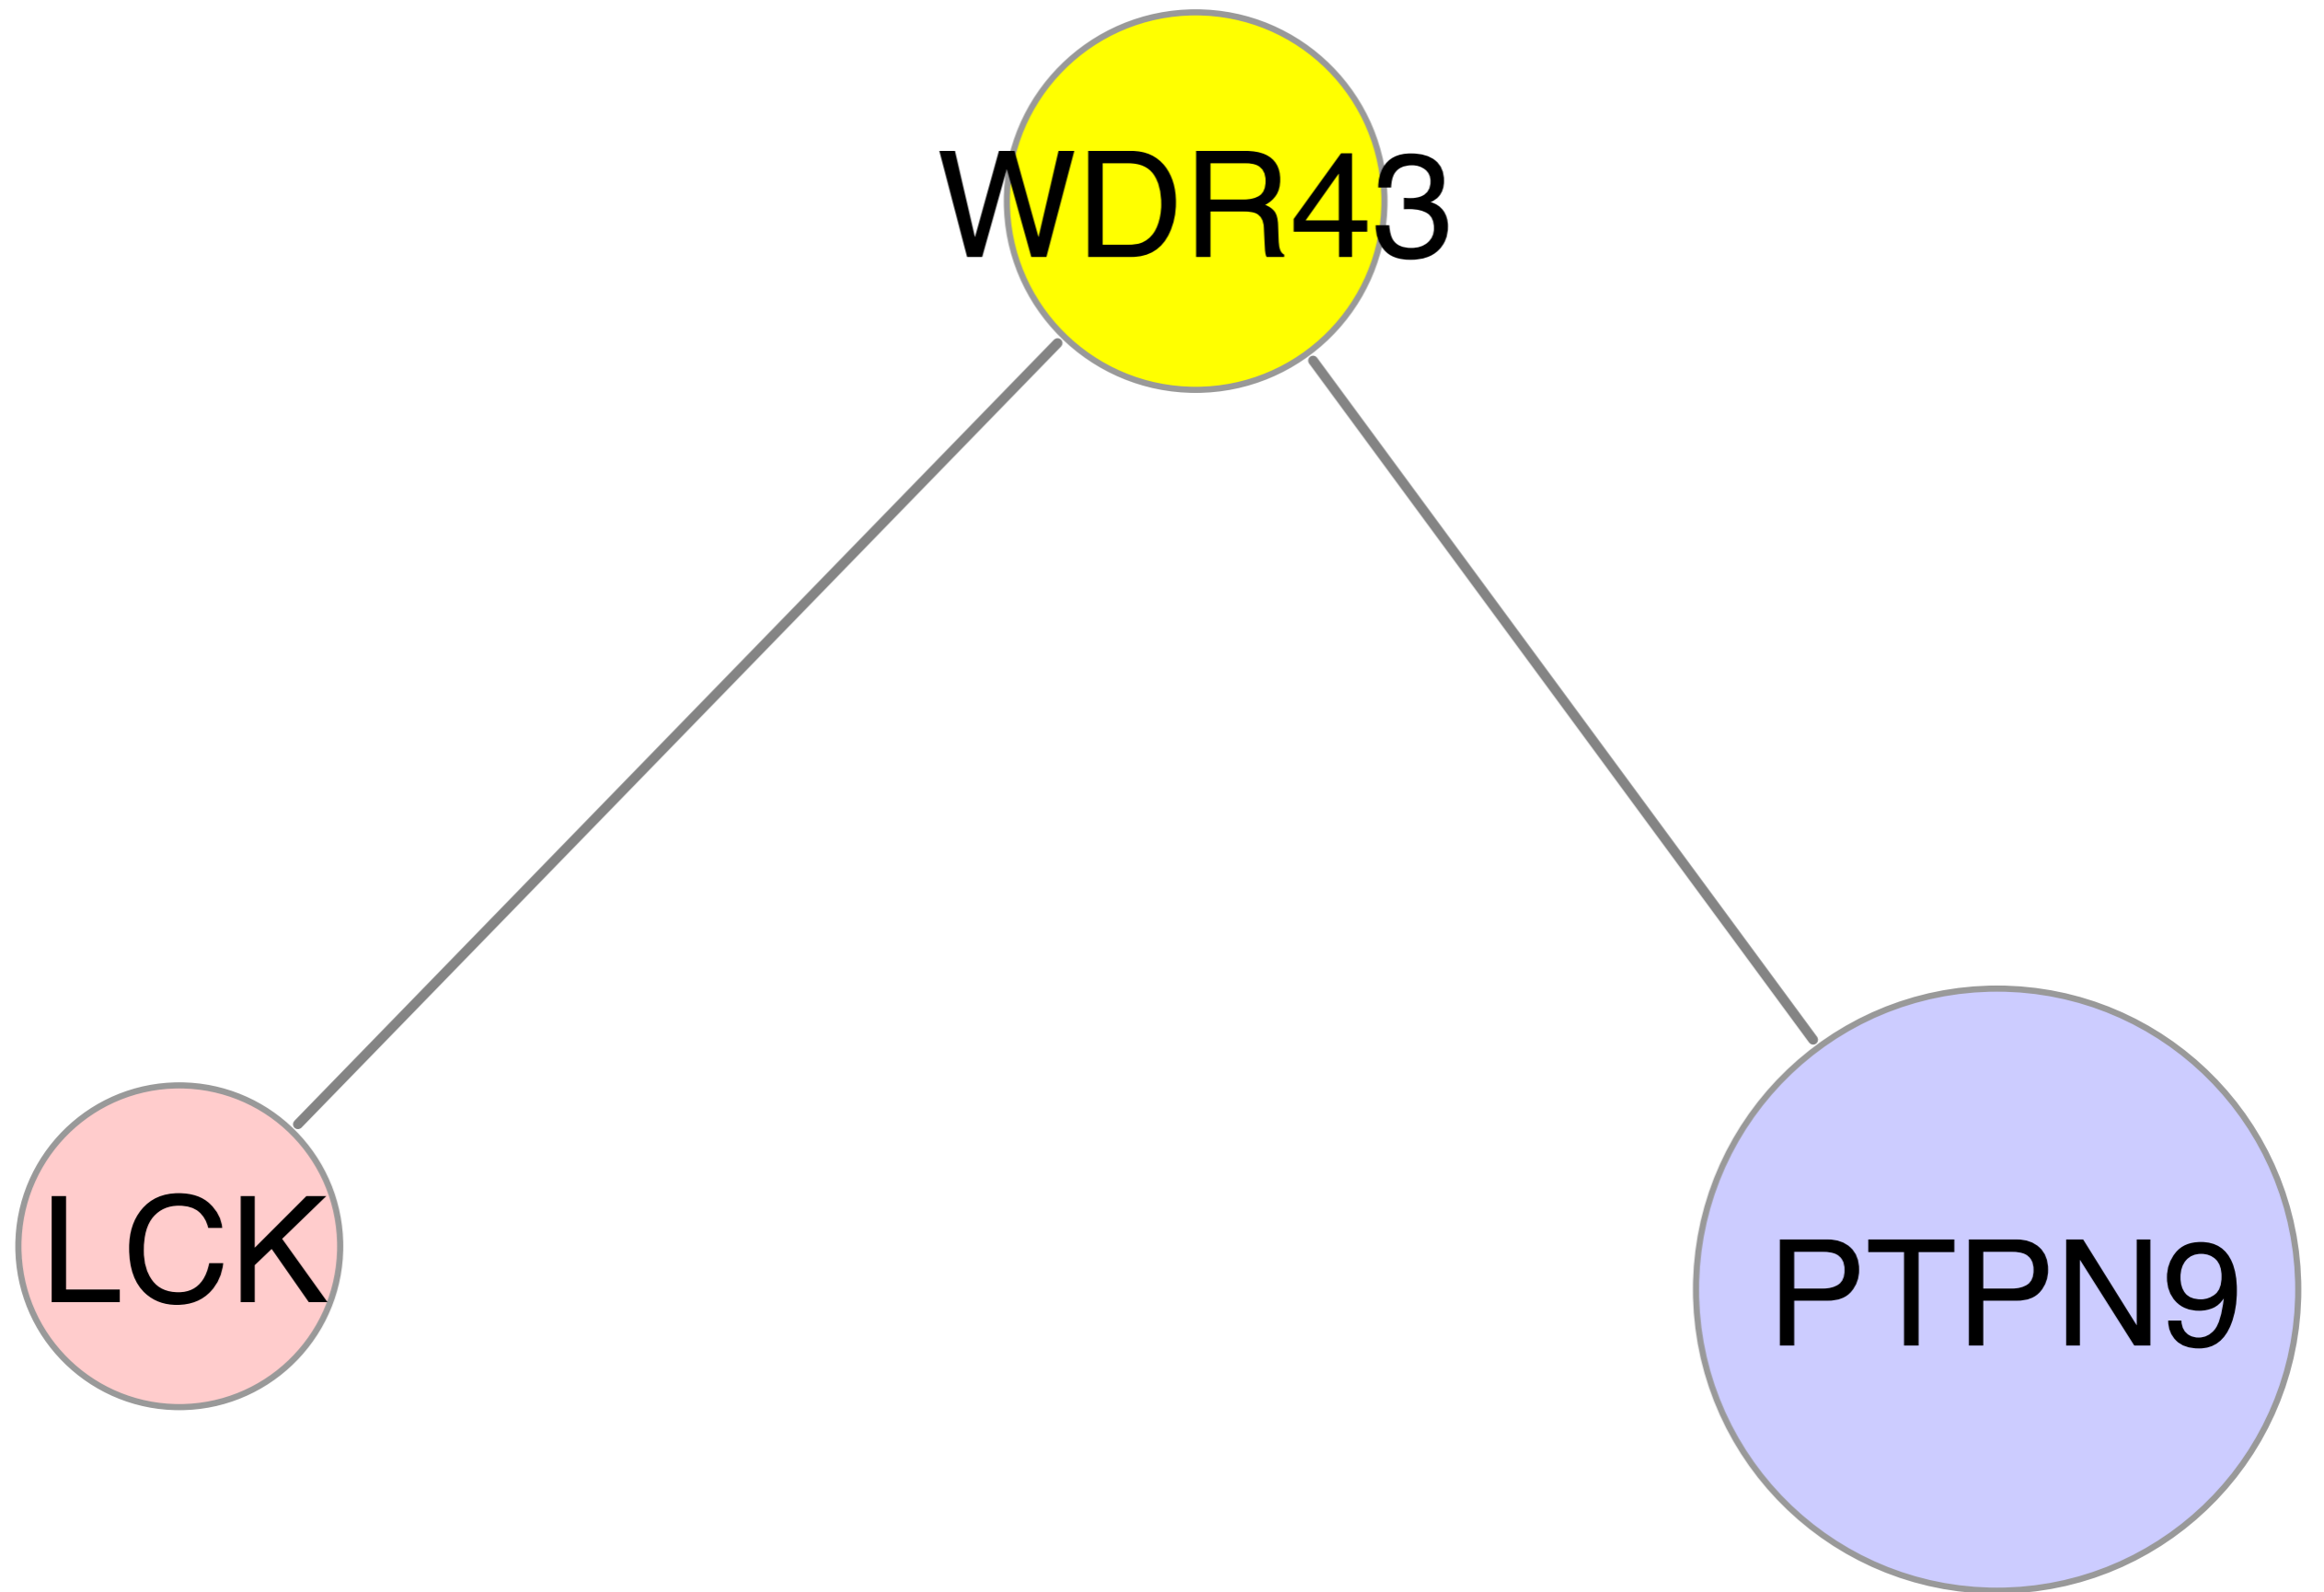

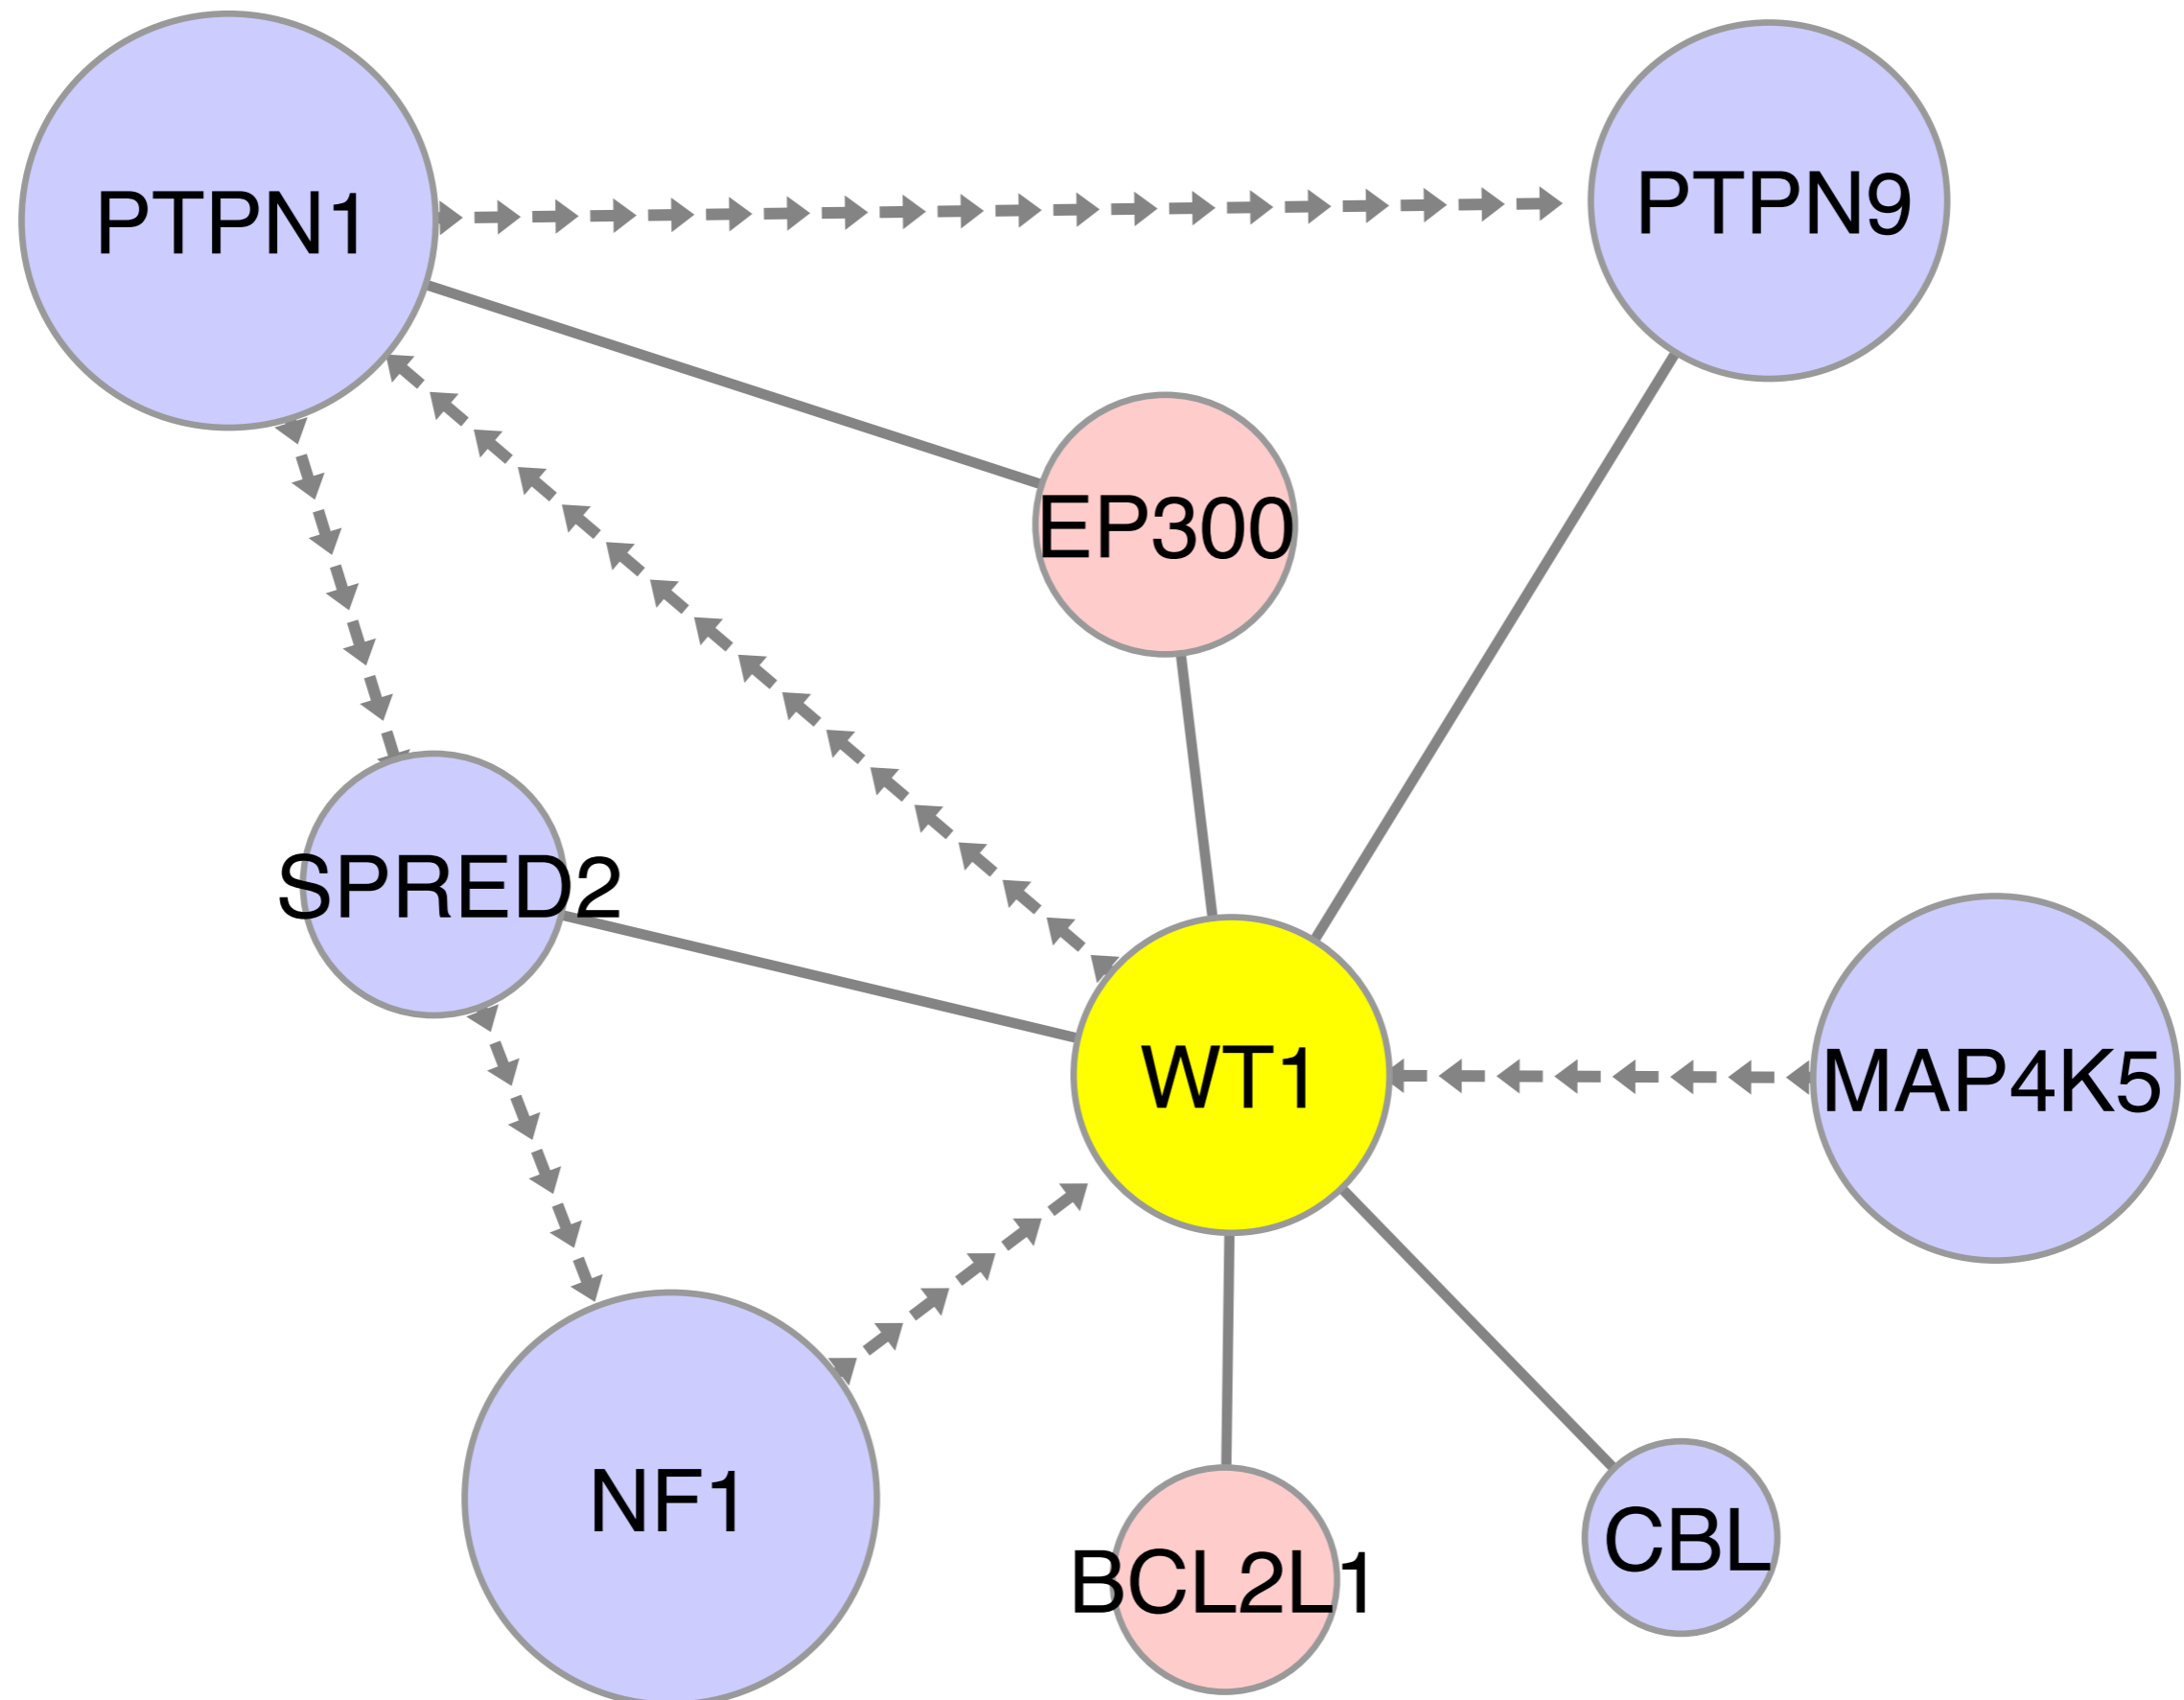

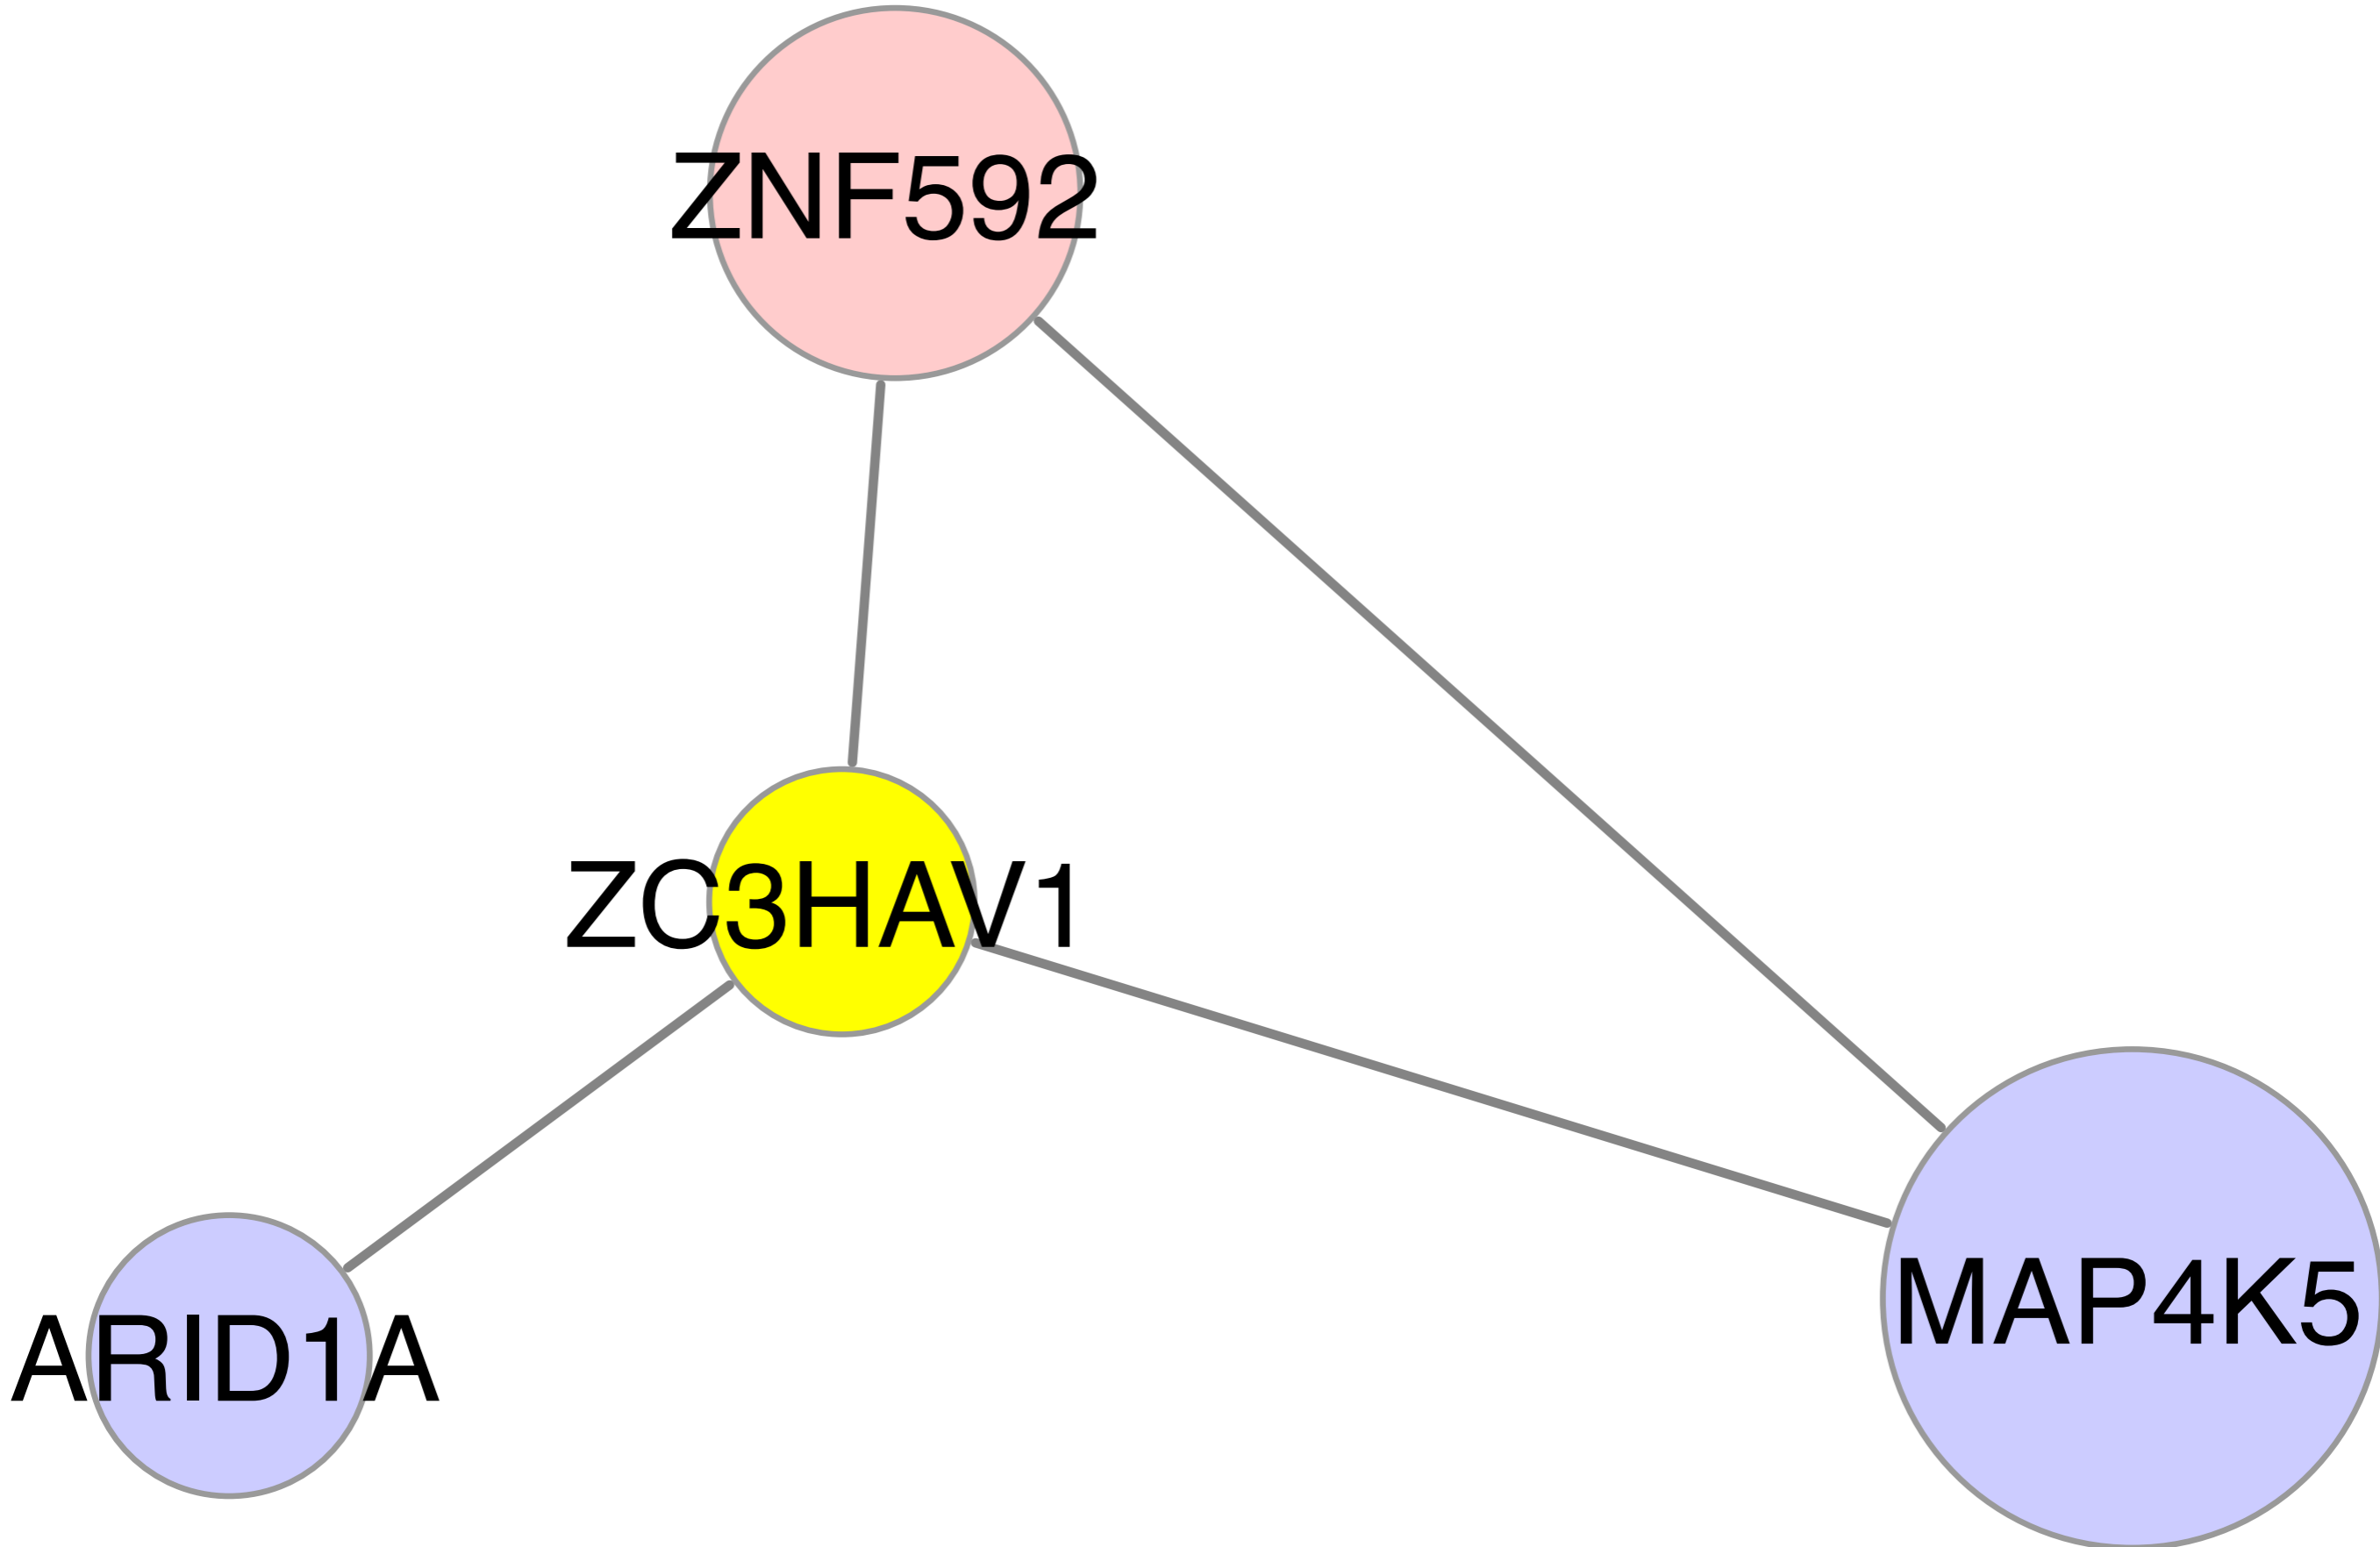

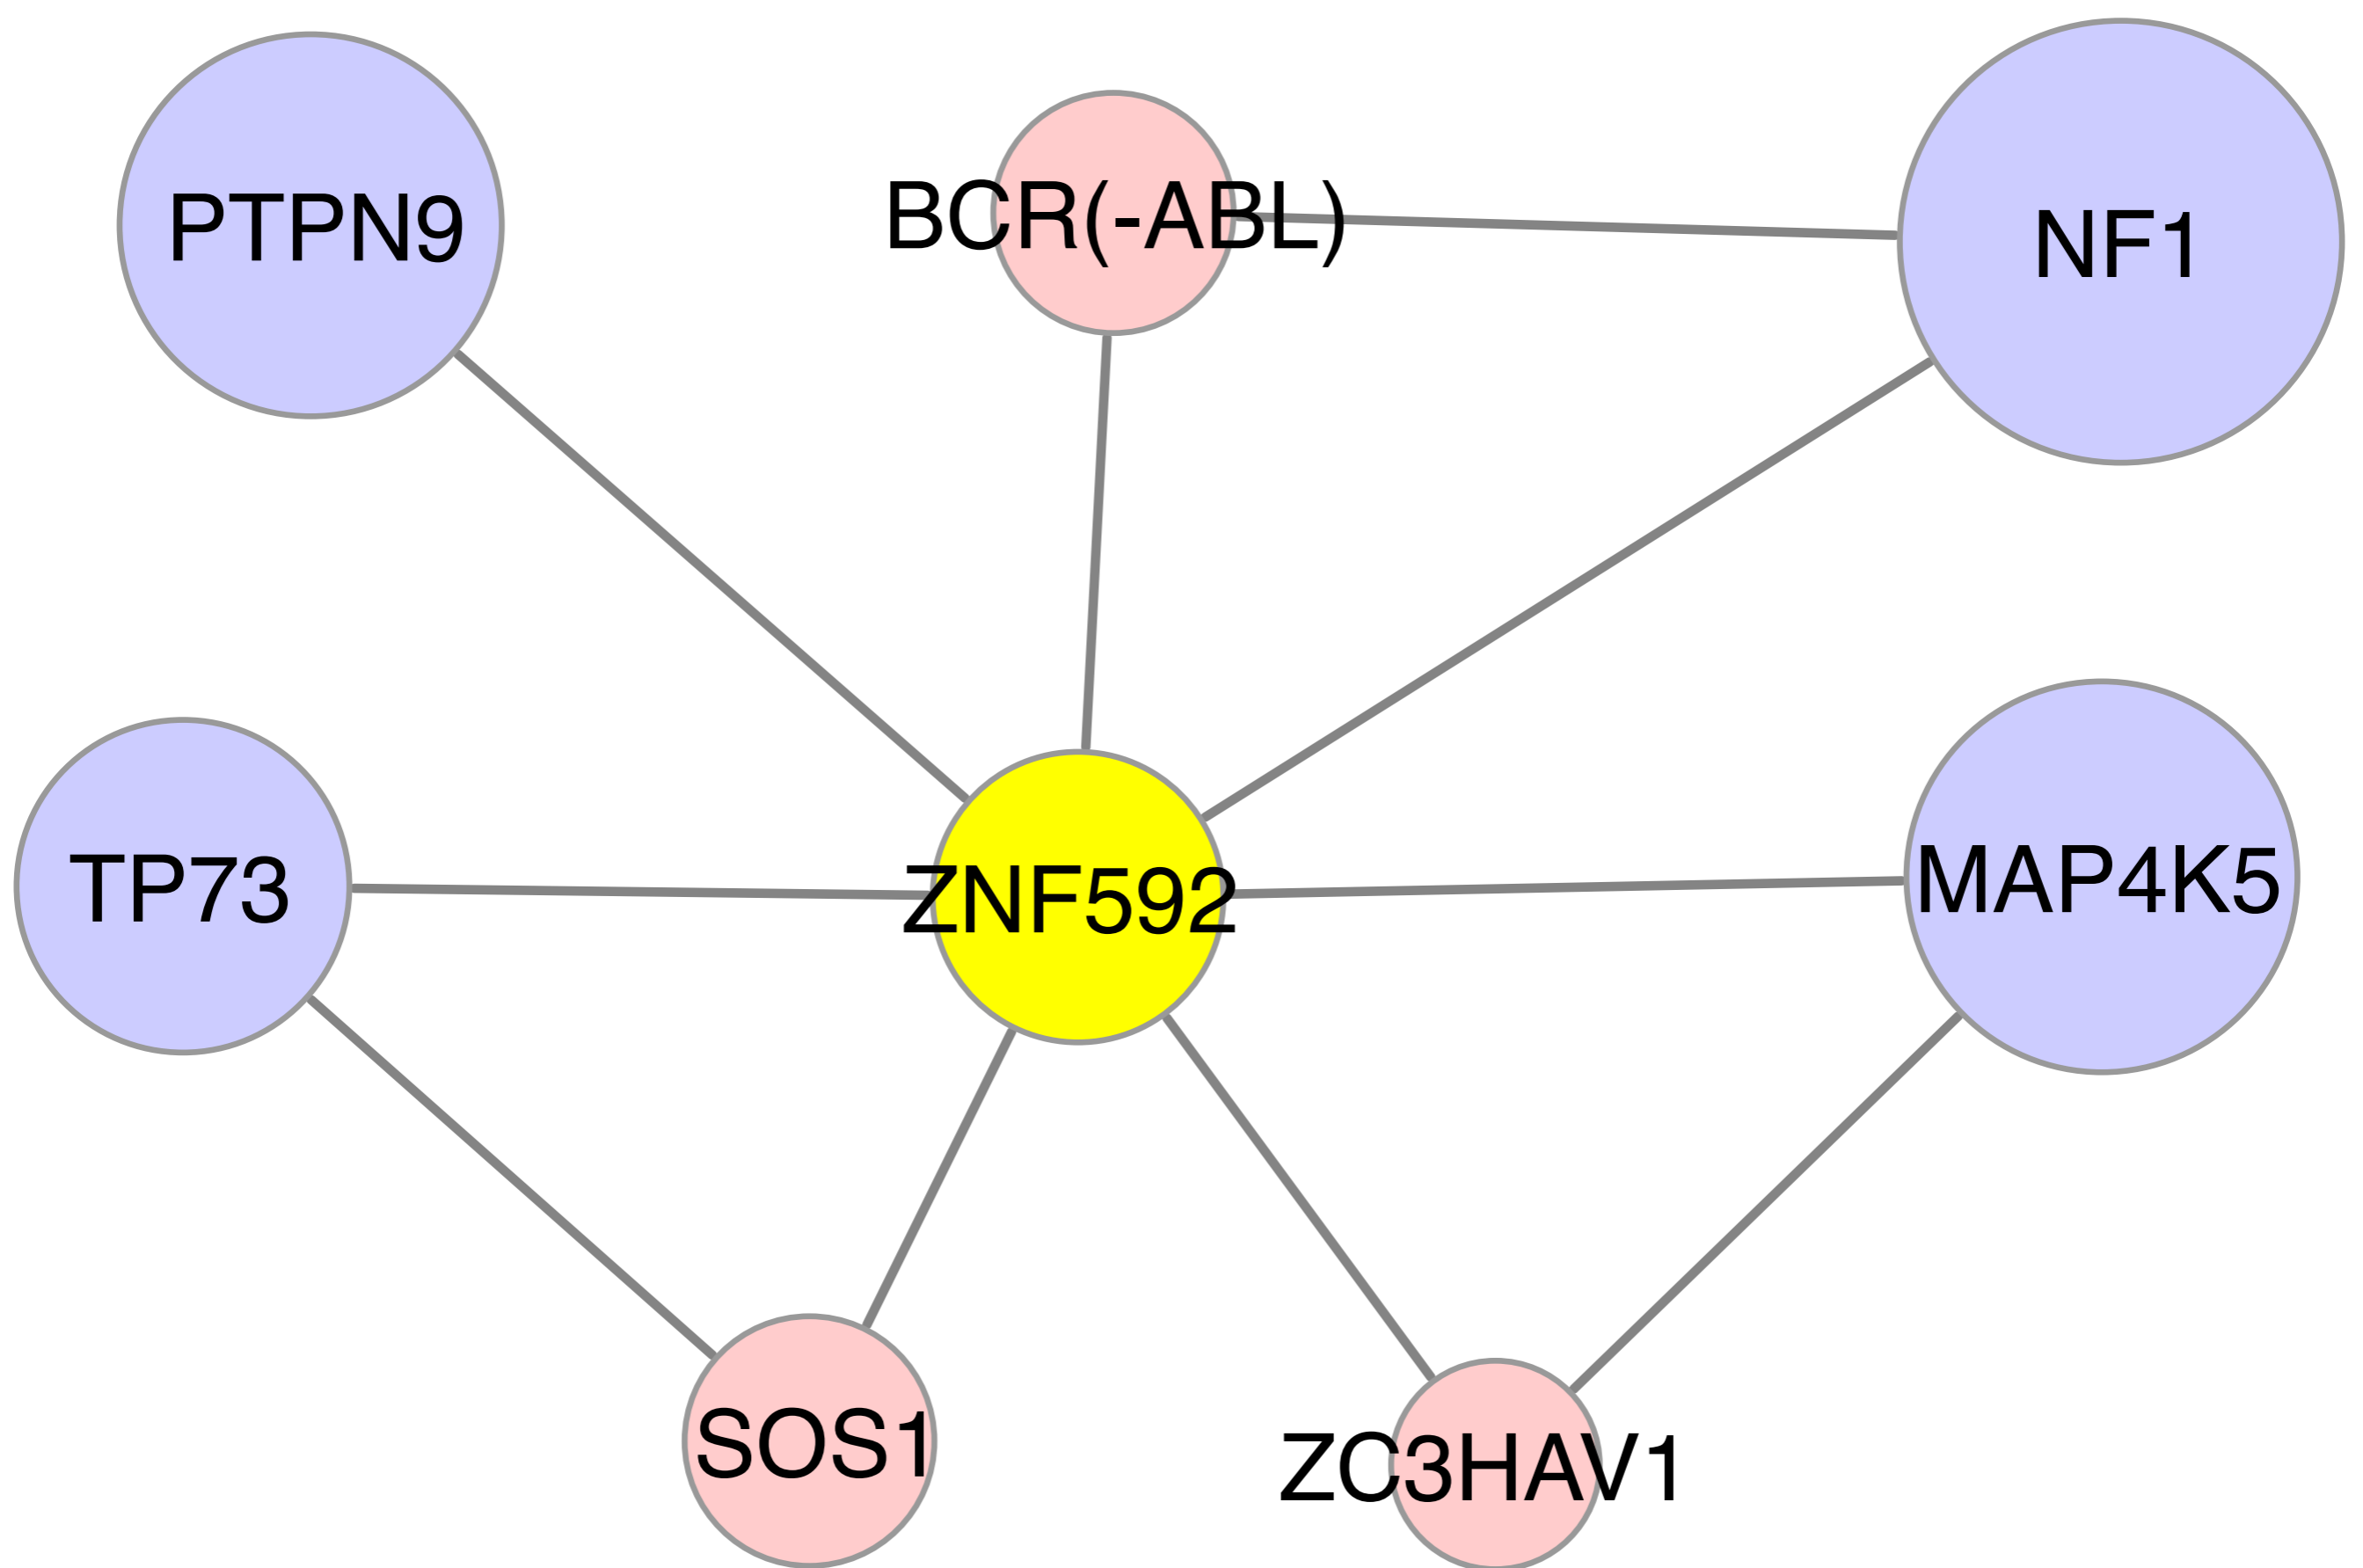

Supplement: Supplementary file [file 120170-6.pdf]
